# Supplementary material for: A multi-adenylate cyclase regulator at the flagellar tip controls African trypanosome transmission
Source: Research Square preprint supplement (doi:10.21203/rs.3.rs-1216579/v1), 2022-01-25
Supplement: Supplementary file 1 [file 13db95389aab21e760522e33.xlsx]

## Sheet: Sheet1
Supplementary Table 7: List of Primers used for cloning
Name	Sequence
CARP3_fw_HindIII	GTGCAAGCTTATGGGAGGAGGTTCATCC
CARP3_Ct_fw_HindIII	GTGCAAGCTTATGTCGCACACTCATG
CARP3_Ty1_Ct_rev_BamHI	GTGCGGATCCTTAGTCAAGTGGGTCCTGGTTAGTATGGACCTCGTTCAATTGGTCA
CARP3_Ty1_Nt_rev_BamHI	GTGCGGATCCTTAGTCAAGTGGGTCCTGGTTAGTATGGACCTCCAAAAGCACATGA
PAmCherry BamHI FWD	GAGCAGGGATCCATGGTGAGCAAGGGCGA
PAmCherry SacI REV	GGCGCCGAGCTCTTACTTGTACAGCTCGTCC
pPOTv4_Lr_mCherry_TY_CARP3 fw	AACAGAGTCTCATGCGCCGTGTGTTGGAGACCCGTAAACGCGGTGGTGCTCTTTTCATGATGTTTGATGACCAATTGAACGGATCGAGCGGTGGTGGCGG
pPOTv4_Lr_mCherry_TY_CARP3 rev	CCTTGACGCTTCCATTTCTTTTTCCTTTTTTTCTTTTCTCACATCCACCCATCCTATTTTCTTCTTTGCTTCCTTTGCATCCAATTTGAGAGACCTGTGC
CARP3_∆3_HindIII_fw	ATCGATAAGCTTATGTCATCCGTTGAAGAC
ACP1orfF	GCATGGTACCACATGGCTGCCCGCACAGAG
ACP1orfR	GCATCTCGAGGTTTTCCTCCTTTGGGGTTGA
ACP1utrF	GCATGGATCCGGGTCGTAGGCATGCGCCAT
ACP1utrR	GCATTCTAGAGGGGGAGCGGGCGCCTCAAT
ACP6orfF	GCATGGTACCGAGGCATATGTGGCGGATG
ACP6orfR	GCATCTCGAGCTGCTTCCCCTTTTCCTCC
ACP6utrF_2	GCATGGATCCTAACAGCAGTAGTGAATTG
ACP6utrR_2	GCATTCTAGAACTTCACCTTCATCCTTCA
mNeon_XhoI_fw	GGTAATCTCGAGATGGTGAGCAAGGGC
mNeon_SalI_rev	GGCAGGGTCGACTTACTTGTACAGCTC
ACP3_ORF_FW	CTTGATGGTACCCGAACACGGCAGCAAGGACAGAGAG
ACP3_ORF_REV	CCAGATCTCGAGAAAATCACCCAGCTCCCCCACGTGATTGGAAA
ACP3_UTR_FW	GGCGCGGGATCCATTAGGATCAAAAGAAGTTA
ACP3_UTR_REV	GGCGATTCTAGACTGATATGGAGGTTCCGTTTTGGAT
ACP4_ORF_FW	CTTGATGGTACCTGCGCGGACGGAAAATGTGACGAAC
ACP4_ORF_REV	CCAGATCTCGAGAAACTTATCAAAATCCGTGGTCCGATTGGGG
ACP4_UTR_FW	CTTGATGGATCCGGGTTTTGGGGGGTTAATGGCACAA
ACP4_UTR_REV	GGCGATTCTAGAATTTCACCGCCGGAGACGTTGTTGA
ACP5_ORF_FW	CTTATGGTACCATGGCTGCGCGGACGGAGA
ACP5_ORF_REV	CTTATCTCGAGCCGCTGCGCTTCGGGGTTT
ACP5_UTR_FW	CCAATGGATCCAAACCACTCCACGAACTAATGACAGG
ACP5_UTR_REV	GGCATTCTAGAGAAGGAGTGTTCCCTGCGATAA
CARP3_hairpin_up_HindIII	GAGTAAGCTTTCAGAGGAATCAGGCGGAG
CARP3_hairpin_up_BamHI	GAGTGGATCCTCAGAGGAATCAGGCGGAG
CARP3_hairpin_sense_XhoI	CTGCCTCGAGCGTTTGCATTTCCATCATC
CARP3_hairpin_antisense_XhoI	GCCACTCGAGCGATTGTCCGACTTTCTTC
mNeon_BamHI_fw	TCTTATGGATCCGGTGGCGGAATGGTGAGCAAGGGCGAGG
mNeon_EcoRI_rev	GGAGGAGAATTCTTACTTGTACAGCTCGTCC
PDEB1_KpnI_fw	CGAATTGGTACCAGATAAACCGTTGGATGTC
PDEB1_BamHI_rev	GCAACTGGATCCACGAGTACTGCTGTTGTTG
p3074_Calp1.3_fw	GGTTGCATTTAAATGGCCTCGAAGAGAATGAAA
p3074_Calp1.3_rev	TCCTCCGGATCCCTTTTTTTTATTTTCCACA
p3074_CARP3_up_SwaI	CGTAGTATTTAAATGTGACATGT
p3074_CARP3_low_BamHI	CGGTATGGATCCAGAACCGTTCAATTGG
MG30	CTAGTCTAGAGGAGGAGGTTCATCCGTT
MG31	AGTATGCGGCCGCGCCATCTTCTCCTGCTCC
MG32	AGTATGCGGCCGCGAAAATAGAGAAGCGGGT
MG33	CTAGGGATCCGATTGGCGATTAAGGATG
Tb927.7.5340F10His	ATACCATGGGCCACCACCACCACCACCACCACCACCACCACGGCGCGGGCGGAGGAGGTTCATCCGTTGAAGAC
Tb927.7.5340_BamHI_rev	AATTCGGATCCTGGCTTTAGTTCAATTGGTCATCAAACAT
ESAG4_fwd_BstBI	GCAAATAAACTTTCGAAGAATGGTTGT
ESAG4-2Ty1_rev_BamHI	TCTAGTGGATCCTTAGTCAAGTGGGTCCTGGTTAGTATGGACCTCACTTGGGTCAAGTGGGTCCTGGTTAGTATGGACCTCGGTGGTAGCGCTG
CARP3_rev_ApaI	AGTGCGGGCCCTTAGTTCAATTGGTC
CARP3_NoSTOP_SpeI	TCGCACTAGTGTTCAATTGGTCATCAAAC
DCAT_Mut1*	caaaggtacgaccaggcacTGCAAGATTGTTATCACGGGTGTTGC
DCAT_Mut2*	gtgcctggtcgtacctttgCTGGTC
restriction sites are underlined
*19 bp overlaps are in lower case
