# Supplementary material for: A multi-adenylate cyclase regulator at the flagellar tip controls African trypanosome transmission
Source: Research Square preprint supplement (doi:10.21203/rs.3.rs-1216579/v1), 2022-01-25
Supplement: Supplementary file 2 [file 1f97b5a678dbe67462b1193a.xlsx]

## Sheet: Sheet1
Supplementary Table 6: Summary of AC isoforms identified by proteome studies in Supplementary Tables 2, 4 and 5
			CARP3 interaction proteomics				Identified in previous transcrtiptome / proteome studies
AC gene ID	AC cluster (Durante et al., 2020)	localization (Saada et al., 20141; Durante et al., 20202; this study3)	CARP3-YFP BSF (Table S2A)	CARP3-YFP PCF (Table S2B)	CARP3 BioID BSF (Table S4)	CARP3 RNAi BSF (Table S5)	Savage et al., 2016 (comparative transcriptome of trypanosomes in tsetse organs)		Shimogawa et al., 2015 (comparative surface proteome BSF & PCF)	Dejung et al., 2016 (comparative label-free proteome BSF to PCF development)	Urbaniak et al., 2012 (comparative SILAC proteome BSF & PCF)	AC gene ID
							FC PV/MG	FC SG/PV	FC PCF/BSF	FC PCF/BSF	FC PCF/BSF
Tb927.11.13740 (ACP5)	2.4	throughout flagellar body, enriched at tip1, flagellar tip3					0.3		6.09	1.5	7.38	Tb927.11.13740 (ACP5)
Tb927.11.17040 (ACP1)	2.1	flagellar tip1,3			protein group	protein group		0.3	3.48		8.07	Tb927.11.17040 (ACP1)
Tb927.10.16190 (ACP2)	2.1	throughout flagellar body1					2.37	0.31				Tb927.10.16190 (ACP2)
Tb927.10.15990	pseudogene						5.01					Tb927.10.15990
Tb927.10.13040 (ACP4)	2.3	flagellar tip1,3					0.28		7.5	only detected in PCF	10.04	Tb927.10.13040 (ACP4)
Tb927.9.15660 (ACP6)	2.1	flagellar tip1,3	protein group				0.46	0.4	5.42		4.39	Tb927.9.15660 (ACP6)
Tb09.v4.0009	2.1											Tb09.v4.0009
Tb927.8.7920	1.1	flagellar tip2										Tb927.8.7920
Tb927.8.7940	1.1		protein group						0.13		0.08	Tb927.8.7940
Tb11.v5.0821	1.4					protein group						Tb11.v5.0821
Tb927.8.7590	1.1						4.07	0.42				Tb927.8.7590
Tb927.8.7930	1.1											Tb927.8.7930
Tb11.v5.0429	1.1				protein group							Tb11.v5.0429.1
Tb927.8.7900	1.1											Tb927.8.7900
Tb927.8.7870	1.1											Tb927.8.7870
Tb927.8.7860	1.1											Tb927.8.7860
Tb927.8.7890	1.1								4.33			Tb927.8.7890
Tb927.8.7910	1.1											Tb927.8.7910
Tb927.8.7880	fragment											Tb927.8.7880
Tb927.2.910	degenerate											Tb927.2.910
Tb927.7.7530	1.1					protein group		2.22	0.52	0.4		Tb927.7.7530
Tb927.7.7520	1.1	throughout flagellar body2						2.64			0.1	Tb927.7.7520
Tb927.7.7470 (ACP3)	2.3	flagellar tip3					0.25		2.82	5.6	5.1	Tb927.7.7470 (ACP3)
Tb927.7.6070	1.4					protein group					0.13 *protein group with Tb927.4.4430	Tb927.7.6080
Tb927.7.6080	1.4				protein group							Tb927.7.6070
Tb927.7.6040	1.4											Tb927.7.6040
Tb927.7.6060	1.4								0.042			Tb927.7.6060
Tb927.7.6050	1.4				*protein group with Tb927.5.650				0.42			Tb927.7.6050
Tb927.6.280	2.9					protein group						Tb927.6.280
Tb927.6.300	2.9											Tb927.6.300
Tb927.6.310	2.9											Tb927.6.310
Tb927.6.180	2.9		protein group									Tb927.6.180
Tb927.6.170	2.9											Tb927.6.170
Tb927.6.320	1.1									1.9		Tb927.6.320
Tb927.6.200	2.8						0.36	0.48	5.34		6.05	Tb927.6.200
Tb927.6.790	2.7							0.43				Tb927.6.790
Tb927.6.780	2.7							0.42				Tb927.6.780
Tb927.6.770	2.7							0.41				Tb927.6.770
Tb927.6.760	2.7							0.36				Tb927.6.760
Tb927.6.430	2.8							0.14				Tb927.6.430
Tb927.6.800	2.7							0.41				Tb927.6.800
Tb11.v5.0456	2.9											Tb11.v5.0456
Tb11.v5.0431	2.8											Tb11.v5.0431
Tb11.v5.0546	1.3											Tb11.v5.0546
Tb11.v5.0425	2.8											Tb11.v5.0425
Tb11.v5.0576	2.8											Tb11.v5.0576
Tb927.5.320	2.6			protein group				0.19			6.11	Tb927.5.320
Tb927.5.285b	2.6							0.19				Tb927.5.285b
Tb927.5.330	2.6	throughout flagellar body2						0.29		5.4		Tb927.5.330
Tb11.v5.0281	2.6											Tb11.v5.0281
Tb11.v5.0209	2.6											Tb11.v5.0209
Tb11.v5.0217	2.3											Tb11.v5.0217
Tb927.5.1450	2.2		protein group				3.47					Tb917.5.1450
Tb927.5.650	1.3				*protein group with Tb927.7.6050						0.13 *protein group with Tb927.4.4430	Tb927.5.650
Tb927.4.4470	1.1				protein group	protein group			0.92			Tb927.4.4470
Tb11.v5.0864	not included											Tb11.v5.0864
Tb11.v5.0865	not included											Tb11.v5.0865
Tb927.4.4460	1.1								8.75		0.13 *protein group with Tb927.4.4430	Tb927.4.4460
Tb927.6.390	pseudogene				protein group							Tb927.6.390
Tb927.6.340	pseudogene										0.13 *protein group with Tb927.4.4430	Tb927.6.340
Tb927.6.270	pseudogene											Tb927.6.270
Tb927.4.4430	1.1					protein group (+29 additional AC isoforms that share some of the peptides)			0.2	only detected in BSF		Tb927.4.4430
Tb927.4.4450	1.1											Tb927.4.4450
Tb927.4.4440	1.1											Tb927.4.4440
	significant hit in proteome analysis (see Tables S2, S4 and S5 for details regarding significance in individual proteome analyses)
	no significant change in abundance upon CARP3 RNAi
	blue: PCF enriched AC isoforms
	red: BSF enriched AC isoforms
	not identified in proteome analysis
protein groups: peptides match to several AC isoforms
FC fold change
