# Supplementary material for: A multi-adenylate cyclase regulator at the flagellar tip controls African trypanosome transmission
Source: Research Square preprint supplement (doi:10.21203/rs.3.rs-1216579/v1), 2022-01-25
Supplement: Supplementary file 3 [file a7ccaca2cb5ed1f6d8b8b6f8.xlsx]

## Sheet: S2a_C3YFP_BSF_sign_10fold
Supplementary Table 2a. CARP3-YFP pull-down in bloodstream forms
CARP3 interacting proteins identified by GFP trap pull-down in bloodstream forms of T. brucei AnTat 1.1E CARP3-YFP compared to wild type. Significantly enriched proteins are shown with p≤0.05 and at least 10-fold enrichment.
Protein IDs	Majority protein IDs	Product Description	Gene Name or Symbol	Fasta headers	Mol. weight [kDa]	Score	Intensity	MS/MS count	Number of proteins	Peptides BSF_WT1	Peptides BSF_WT2	Peptides BSF_YFP1	Peptides BSF_YFP2	Razor + unique peptides BSF_WT1	Razor + unique peptides BSF_WT2	Razor + unique peptides BSF_YFP1	Razor + unique peptides BSF_YFP2	Unique peptides BSF_WT1	Unique peptides BSF_WT2	Unique peptides BSF_YFP1	Unique peptides BSF_YFP2	Sequence coverage BSF_WT1 [%]	Sequence coverage BSF_WT2 [%]	Sequence coverage BSF_YFP1 [%]	Sequence coverage BSF_YFP2 [%]	Sequence length	Intensity BSF_WT1	Intensity BSF_WT2	Intensity BSF_YFP1	Intensity BSF_YFP2	-Log Student's T-test p-value BSF_YFP_BSF_WT	p value	Student's T-test q-value BSF_YFP_BSF_WT	Student's T-test Difference BSF_YFP_BSF_WT	fold change	Student's T-test Test statistic BSF_YFP_BSF_WT	iBAQ BSF_WT1	iBAQ BSF_WT2	iBAQ BSF_YFP1	iBAQ BSF_YFP2
Tb927.7.5340	Tb927.7.5340	cAMP response protein 3	CARP3	Tb927.7.5340 | transcript=Tb927.7.5340:mRNA | gene=Tb927.7.5340 | organism=Trypanosoma_brucei_brucei_TREU927 | gene_product=cAMP response protein 3 | transcript_product=cAMP response protein 3 | location=Tb927_07_v5.1:1419326-1420822(+) | protein_l	56.822	323.31	24739000000	220	1	1	1	34	44	1	1	34	44	1	1	34	44	3	2.2	59.4	72.1	498	891290	1167600	5773100000	13834000000	2.59711	0.00252864	0	13.0968	8760.53	4.92392	15.0651	15.4547	27.7262	28.9871
Tb927.4.4430	Tb927.4.4430	adenylyl cyclase	GRESAG 4.4	Tb927.4.4430 | transcript=Tb927.4.4430:mRNA | gene=Tb927.4.4430 | organism=Trypanosoma_brucei_brucei_TREU927 | gene_product=adenylyl cyclase | transcript_product=adenylyl cyclase | location=Tb927_04_v5.1:1177872-1181603(-) | protein_length=1243 | s	138.27	323.31	3837100000	159	1	0	0	46	70	0	0	46	70	0	0	2	6	0	0	32.7	45.9	1243	0	0	971410000	2838000000	2.20018	0.006307	0	9.8919	950.074	3.54635	14.579	14.8949	23.8555	25.4022
Tb927.8.7940; Tb11.v5.0821.1	Tb927.8.7940	receptor-type adenylate cyclase GRESAG 4, putative	GRESAG 4	Tb927.8.7940 | transcript=Tb927.8.7940:mRNA | gene=Tb927.8.7940 | organism=Trypanosoma_brucei_brucei_TREU927 | gene_product=receptor-type adenylate cyclase GRESAG 4, putative | transcript_product=receptor-type adenylate cyclase GRESAG 4, putative |	138.49	323.31	865910000	78	2	0	0	33	48	0	0	25	40	0	0	11	17	0	0	23.8	31	1250	0	0	215450000	650450000	2.01044	0.00976248	0	8.2624	307.064	2.92743	14.3978	13.9924	21.6604	23.2545
Tb927.7.7520	Tb927.7.7520	receptor-type adenylate cyclase GRESAG 4, putative	GRESAG 4	Tb927.7.7520 | transcript=Tb927.7.7520:mRNA | gene=Tb927.7.7520 | organism=Trypanosoma_brucei_brucei_TREU927 | gene_product=receptor-type adenylate cyclase GRESAG 4, putative | transcript_product=receptor-type adenylate cyclase GRESAG 4, putative |	137.88	132.71	867350000	48	1	0	0	36	61	0	0	11	31	0	0	0	0	0	0	26.2	39	1243	0	0	291740000	575610000	2.30928	0.00490596	0	8.07933	270.471	3.14617	14.7955	14.2217	22.0977	23.0782
Tb927.4.4440	Tb927.4.4440	adenylyl cyclase	GRESAG 4.4	Tb927.4.4440 | transcript=Tb927.4.4440:mRNA | gene=Tb927.4.4440 | organism=Trypanosoma_brucei_brucei_TREU927 | gene_product=adenylyl cyclase | transcript_product=adenylyl cyclase | location=Tb927_04_v5.1:1182723-1186466(-) | protein_length=1247 | s	138.7	34.278	150020000	16	1	0	0	47	66	0	0	6	8	0	0	0	0	0	0	32.5	42.7	1247	0	0	48490000	101530000	1.92258	0.0119514	0	6.09568	68.3882	2.28094	14.3785	13.5587	19.5312	20.5973
Tb927.4.4470; Tb927.5.650; Tb927.5.1450	Tb927.4.4470	adenylyl cyclase	GRESAG 4.4	Tb927.4.4470 | transcript=Tb927.4.4470:mRNA | gene=Tb927.4.4470 | organism=Trypanosoma_brucei_brucei_TREU927 | gene_product=adenylyl cyclase | transcript_product=adenylyl cyclase | location=Tb927_04_v5.1:1196301-1200116(-) | protein_length=1271 | s	141.96	33.601	80167000	9	3	0	0	36	48	0	0	4	5	0	0	1	2	0	0	27.6	36	1271	0	0	19593000	60574000	1.66036	0.0218596	0	5.74805	53.7448	2.00695	12.8921	13.4708	18.1153	19.7437
Tb927.4.4460	Tb927.4.4460	adenylyl cyclase	GRESAG 4.4	Tb927.4.4460 | transcript=Tb927.4.4460:mRNA | gene=Tb927.4.4460 | organism=Trypanosoma_brucei_brucei_TREU927 | gene_product=adenylyl cyclase | transcript_product=adenylyl cyclase | location=Tb927_04_v5.1:1191876-1195742(-) | protein_length=1288 | s	144.26	65.051	100340000	9	1	0	0	38	50	0	0	4	4	0	0	1	1	0	0	27.1	33.9	1288	0	0	39332000	61011000	1.95789	0.0110183	0	5.18676	36.4224	2.03483	13.7609	14.6578	19.0794	19.7128
Tb927.6.310	Tb927.6.310	receptor-type adenylate cyclase GRESAG 4, putative	GRESAG 4	Tb927.6.310 | transcript=Tb927.6.310:mRNA | gene=Tb927.6.310 | organism=Trypanosoma_brucei_brucei_TREU927 | gene_product=receptor-type adenylate cyclase GRESAG 4, putative | transcript_product=receptor-type adenylate cyclase GRESAG 4, putative | lo	140.37	4.8635	111360000	2	1	0	0	11	13	0	0	1	1	0	0	1	1	0	0	5.2	6.2	1272	0	0	38444000	72913000	2.03127	0.00930526	0	5.14584	35.4041	2.05843	14.9758	14.5926	19.4683	20.3917
Tb927.8.7930	Tb927.8.7930	receptor-type adenylate cyclase GRESAG 4, putative	GRESAG 4	Tb927.8.7930 | transcript=Tb927.8.7930:mRNA | gene=Tb927.8.7930 | organism=Trypanosoma_brucei_brucei_TREU927 | gene_product=receptor-type adenylate cyclase GRESAG 4, putative | transcript_product=receptor-type adenylate cyclase GRESAG 4, putative |	140.94	42.249	89421000	8	1	0	0	25	34	0	0	2	5	0	0	0	0	0	0	20.9	31.1	1267	0	0	23445000	65976000	1.65208	0.0222801	0	5.06366	33.4436	1.82887	14.3725	14.0038	18.5055	19.9981
Tb927.6.180; Tb11.v5.0456.1; Tb927.6.170; Tb11.v5.0431.1; Tb11.v5.0546.1; Tb927.6.320; Tb927.6.200; Tb11.v5.0425.1; Tb11.v5.0576.1; Tb927.6.790; Tb927.6.780; Tb927.6.770; Tb927.6.760; Tb927.6.430; Tb927.6.800	Tb927.6.180; Tb11.v5.0456.1; Tb927.6.170; Tb11.v5.0431.1; Tb11.v5.0546.1; Tb927.6.320; Tb927.6.200; Tb11.v5.0425.1; Tb11.v5.0576.1; Tb927.6.790; Tb927.6.780; Tb927.6.770; Tb927.6.760; Tb927.6.430; Tb927.6.800	receptor-type adenylate cyclase GRESAG 4, putative	GRESAG 4	Tb927.6.180 | transcript=Tb927.6.180:mRNA | gene=Tb927.6.180 | organism=Trypanosoma_brucei_brucei_TREU927 | gene_product=receptor-type adenylate cyclase GRESAG 4, putative | transcript_product=receptor-type adenylate cyclase GRESAG 4, putative | lo	140.36	10.945	100090000	4	15	0	0	12	14	0	0	1	2	0	0	0	0	0	0	6.4	7.8	1268	0	0	30152000	60800000	1.93057	0.0117335	0	4.70508	26.0837	1.8714	14.6476	14.8317	18.9389	19.9506
Tb927.8.7920	Tb927.8.7920	receptor-type adenylate cyclase GRESAG 4, putative	GRESAG 4	Tb927.8.7920 | transcript=Tb927.8.7920:mRNA | gene=Tb927.8.7920 | organism=Trypanosoma_brucei_brucei_TREU927 | gene_product=receptor-type adenylate cyclase GRESAG 4, putative | transcript_product=receptor-type adenylate cyclase GRESAG 4, putative |	140.55	32.957	108020000	15	1	0	0	23	34	0	0	5	8	0	0	0	1	0	0	19.1	28.3	1264	0	0	24860000	83159000	1.39881	0.0399203	0	4.42161	21.4307	1.51896	14.7277	15.261	18.5449	20.287
Tb927.10.2910	Tb927.10.2910	splicing factor PTSR1 interacting protein	TSR1IP	Tb927.10.2910 | transcript=Tb927.10.2910:mRNA | gene=Tb927.10.2910 | organism=Trypanosoma_brucei_brucei_TREU927 | gene_product=splicing factor PTSR1 interacting protein | transcript_product=splicing factor PTSR1 interacting protein | location=Tb927	43.652	2.7519	12354000	5	1	0	0	1	1	0	0	1	1	0	0	1	1	0	0	4.5	4.5	378	0	0	3040200	5533700	1.787	0.0163305	0	3.66047	12.6448	1.47982	14.9163	14.5283	17.9508	18.8148
Tb927.9.15660; Tb09.v4.0009	Tb927.9.15660; Tb09.v4.0009	procyclic-enriched flagellar receptor adenylate cyclase 6	ACP6	Tb927.9.15660 | transcript=Tb927.9.15660:mRNA | gene=Tb927.9.15660 | organism=Trypanosoma_brucei_brucei_TREU927 | gene_product=procyclic-enriched flagellar receptor adenylate cyclase 6 | transcript_product=procyclic-enriched flagellar receptor aden	137.52	21.301	52202000	2	2	0	0	2	2	0	0	1	1	0	0	1	1	0	0	2.3	2.3	1242	0	0	16671000	35531000	1.6657	0.0215925	0	3.65449	12.5925	1.43545	14.8413	14.8344	17.9464	19.0382
Tb927.11.13007; Tb927.11.13003; Tb11.v5.0537.1; Tb927.11.9920; Tb11.01.1680.v5.1	Tb927.11.13007; Tb927.11.13003; Tb11.v5.0537.1; Tb927.11.9920; Tb11.01.1680.v5.1	ubiquitin-60S ribosomal protein L40		Tb927.11.13007 | transcript=Tb927.11.13007:mRNA | gene=Tb927.11.13007 | organism=Trypanosoma_brucei_brucei_TREU927 | gene_product=ubiquitin-60S ribosomal protein L40 | transcript_product=ubiquitin-60S ribosomal protein L40 | location=Tb927_11_v5.1:	14.656	9.2362	20101000	9	5	0	0	1	2	0	0	1	2	0	0	1	2	0	0	9.4	23.4	128	0	0	2037800	3570700	1.62632	0.023642	0	3.54999	11.7126	1.38902	14.8472	15.6093	18.3736	19.1828

## Sheet: S2b_C3YFP_PCF_sign_10fold
Supplementary Table 2b. CARP3-YFP pull-down in procyclic forms
CARP3 interacting proteins identified by GFP trap pull-down in procyclic T. brucei AnTat 1.1E CARP3-YFP compared to wild type. Significantly enriched proteins are shown with p≤0.05 and at least 10-fold enrichment.
Protein IDs	Majority protein IDs	Product Description	Gene Name or Symbol	Fasta headers	Mol. weight [kDa]	Score	Intensity	MS/MS count	Number of proteins	Peptides PCF_WT1	Peptides PCF_WT2	Peptides PCF_YFP1	Peptides PCF_YFP2	Razor + unique peptides PCF_WT1	Razor + unique peptides PCF_WT2	Razor + unique peptides PCF_YFP1	Razor + unique peptides PCF_YFP2	Unique peptides PCF_WT1	Unique peptides PCF_WT2	Unique peptides PCF_YFP1	Unique peptides PCF_YFP2	Sequence length	Sequence coverage PCF_WT1 [%]	Sequence coverage PCF_WT2 [%]	Sequence coverage PCF_YFP1 [%]	Sequence coverage PCF_YFP2 [%]	Intensity PCF_WT1	Intensity PCF_WT2	Intensity PCF_YFP1	Intensity PCF_YFP2	-Log Student's T-test p-value PCF_YFP_PCF_WT	p value	Student's T-test q-value PCF_YFP_PCF_WT	Student's T-test Difference PCF_YFP_PCF_WT	fold change	Student's T-test Test statistic PCF_YFP_PCF_WT	iBAQ PCF_WT1	iBAQ PCF_WT2	iBAQ PCF_YFP1	iBAQ PCF_YFP2
Tb927.7.5340	Tb927.7.5340	cAMP response protein 3	CARP3	Tb927.7.5340 | transcript=Tb927.7.5340 | gene=Tb927.7.5340 | organism=Trypanosoma_brucei_brucei_TREU927 | gene_product=cAMP response protein 3 | transcript_product=cAMP response protein 3 | location=Tb927_07_v5.1:1419326-1420822(+) | protein_l	56.822	323.31	24739000000	220	1	0	0	29	33	0	0	29	33	0	0	29	33	498	0	0	53.6	61.8	0	0	2133600000	2996000000	2.79757	0.00159379	0.136	11.2887	2501.74	25.0187	14.8674	15.6253	26.2902	26.7799
Tb927.11.13740	Tb927.11.13740	procyclic-enriched flagellar receptor adenylate cyclase 5	ACP5	Tb927.11.13740 | transcript=Tb927.11.13740 | gene=Tb927.11.13740 | organism=Trypanosoma_brucei_brucei_TREU927 | gene_product=procyclic-enriched flagellar receptor adenylate cyclase 5 | transcript_product=procyclic-enriched flagellar receptor a	133.78	107.12	119320000	26	1	0	0	12	14	0	0	11	13	0	0	10	12	1214	0	0	17.9	16.5	0	0	52312000	63554000	2.70191	0.00198652	0.2176	6.2478	75.9935	22.403	13.7377	14.2196	20.086	20.3669
Tb927.10.2890; Tb11.v5.0650.1	Tb927.10.2890; Tb11.v5.0650.1	enolase		Tb927.10.2890 | transcript=Tb927.10.2890 | gene=Tb927.10.2890 | organism=Trypanosoma_brucei_brucei_TREU927 | gene_product=enolase | transcript_product=enolase | location=Tb927_10_v5.1:746309-747598(+) | protein_length=429 | sequence_SO=chromos	46.592	204.06	291280000	66	2	1	0	4	9	1	0	4	9	1	0	4	9	429	3.5	0	9.8	26.6	968050	0	7088700	20426000	1.39999	0.0398112	0.2445	3.75831	13.532	4.86094	15.2409	14.9958	18.1132	19.64
Tb927.5.320; Tb927.5.285b; Tb11.v5.0209.1; Tb927.5.330; Tb11.v5.0281.1; Tb11.v5.0217.1	Tb927.5.320; Tb927.5.285b; Tb11.v5.0209.1; Tb927.5.330; Tb11.v5.0281.1; Tb11.v5.0217.1	receptor-type adenylate cyclase GRESAG 4, putative	GRESAG 4	Tb927.5.320 | transcript=Tb927.5.320 | gene=Tb927.5.320 | organism=Trypanosoma_brucei_brucei_TREU927 | gene_product=receptor-type adenylate cyclase GRESAG 4, putative | transcript_product=receptor-type adenylate cyclase GRESAG 4, putative | lo	136.56	38.64	78795000	13	6	0	0	7	8	0	0	7	7	0	0	6	5	1236	0	0	7.8	7.5	0	0	33481000	45314000	2.81531	0.00152998	0.181333	5.73465	53.2479	25.5363	13.7554	13.8607	19.3244	19.761
Tb927.4.4430	Tb927.4.4430	adenylyl cyclase	GRESAG 4.4	Tb927.4.4430 | transcript=Tb927.4.4430 | gene=Tb927.4.4430 | organism=Trypanosoma_brucei_brucei_TREU927 | gene_product=adenylyl cyclase | transcript_product=adenylyl cyclase | location=Tb927_04_v5.1:1177872-1181603(-) | protein_length=1243 | s	138.27	323.31	3837100000	159	1	0	0	5	8	0	0	5	8	0	0	0	0	1243	0	0	7.5	10.5	0	0	9592200	18073000	1.78347	0.0164637	0.261	3.74832	13.4387	7.697	13.7336	14.0705	17.1934	18.1073
Tb927.10.13040	Tb927.10.13040	procyclic-enriched flagellar receptor adenylate cyclase 4	ACP4	Tb927.10.13040 | transcript=Tb927.10.13040 | gene=Tb927.10.13040 | organism=Trypanosoma_brucei_brucei_TREU927 | gene_product=procyclic-enriched flagellar receptor adenylate cyclase 4 | transcript_product=procyclic-enriched flagellar receptor a	133.33	36.56	21153000	11	1	0	0	6	7	0	0	5	6	0	0	5	6	1209	0	0	8.9	8.6	0	0	6544200	14609000	1.38995	0.0407425	0.288941	3.5924	12.062	4.80154	14.3742	13.4273	16.9138	18.0724
Tb927.7.7470	Tb927.7.7470	procyclic-enriched flagellar receptor adenylate cyclase 3	ACP3	Tb927.7.7470 | transcript=Tb927.7.7470 | gene=Tb927.7.7470 | organism=Trypanosoma_brucei_brucei_TREU927 | gene_product=procyclic-enriched flagellar receptor adenylate cyclase 3 | transcript_product=procyclic-enriched flagellar receptor adenyla	132.9	84.972	21072000	7	1	0	0	4	6	0	0	2	4	0	0	2	4	1205	0	0	4.1	5.1	0	0	8556600	12516000	2.03662	0.00919134	0.298286	3.5662	11.8449	10.3586	13.8563	14.2724	17.3562	17.9048
Tb927.11.13140; Tb927.11.13125	Tb927.11.13140; Tb927.11.13125	cytochrome oxidase subunit X	COXX	Tb927.11.13140 | transcript=Tb927.11.13140 | gene=Tb927.11.13140 | organism=Trypanosoma_brucei_brucei_TREU927 | gene_product=cytochrome oxidase subunit X | transcript_product=cytochrome oxidase subunit X | location=Tb927_11_v5.1:3520862-352121	13.672	8.582	17639000	6	2	0	0	1	4	0	0	1	4	0	0	1	4	116	0	0	9.5	45.7	0	0	3219000	14420000	1.4527	0.0352613	0.246857	5.67417	51.0619	5.1835	14.3863	14.0504	18.8108	20.9742
Tb927.9.8160	Tb927.9.8160	chaperone protein DnaJ, putative	J11	Tb927.9.8160 | transcript=Tb927.9.8160 | gene=Tb927.9.8160 | organism=Trypanosoma_brucei_brucei_TREU927 | gene_product=chaperone protein DnaJ, putative | transcript_product=chaperone protein DnaJ, putative | location=Tb927_09_v5.1:1339368-1340	47.83	27.597	42679000	7	1	0	0	3	3	0	0	3	3	0	0	3	3	430	0	0	8.1	8.1	0	0	17489000	25191000	1.50677	0.031134	0.272727	5.95804	62.1655	5.53418	14.9496	12.8617	19.6005	20.1269
Tb927.11.11690	Tb927.11.11690	Vacuolar proton pump subunit B, putative		Tb927.11.11690 | transcript=Tb927.11.11690 | gene=Tb927.11.11690 | organism=Trypanosoma_brucei_brucei_TREU927 | gene_product=Vacuolar proton pump subunit B, putative | transcript_product=Vacuolar proton pump subunit B, putative | location=Tb92	55.619	18.221	10580000	7	1	0	0	4	3	0	0	4	3	0	0	4	3	495	0	0	12.9	10.9	0	0	5357700	5222600	4.13966	7.25e-05	0	3.54874	11.7025	117.438	14.225	14.1771	17.7682	17.7314
Tb927.10.14930	Tb927.10.14930	Zinc finger CCCH domain-containing protein 39	ZC3H39	Tb927.10.14930 | transcript=Tb927.10.14930 | gene=Tb927.10.14930 | organism=Trypanosoma_brucei_brucei_TREU927 | gene_product=Zinc finger CCCH domain-containing protein 39 | transcript_product=Zinc finger CCCH domain-containing protein 39 | loc	31.519	6.1106	9110700	4	1	0	0	1	2	0	0	1	2	0	0	1	2	285	0	0	4.9	12.3	0	0	2139500	6394600	1.47389	0.0335821	0.230769	4.71673	26.2952	5.31849	12.8912	13.6979	17.2215	18.8011
Tb927.10.9400	Tb927.10.9400	splicing factor 1	SF1	Tb927.10.9400 | transcript=Tb927.10.9400 | gene=Tb927.10.9400 | organism=Trypanosoma_brucei_brucei_TREU927 | gene_product=splicing factor 1 | transcript_product=splicing factor 1 | location=Tb927_10_v5.1:2324478-2325293(+) | protein_length=271	31.63	21.857	32896000	11	1	0	0	1	1	0	0	1	1	0	0	1	1	271	0	0	5.5	5.5	0	0	2343200	3465000	1.50586	0.0311988	0.25	3.56368	11.8243	5.52815	14.4581	13.2989	17.16	17.7244
Tb927.4.3060	Tb927.4.3060	hypothetical protein, conserved		Tb927.4.3060 | transcript=Tb927.4.3060 | gene=Tb927.4.3060 | organism=Trypanosoma_brucei_brucei_TREU927 | gene_product=hypothetical protein, conserved | transcript_product=hypothetical protein, conserved | location=Tb927_04_v5.1:810076-810522(	17.732	1.7485	9412700	5	1	0	0	1	1	0	0	1	1	0	0	1	1	148	0	0	6.1	6.1	0	0	2430200	3149000	2.95121	0.00111891	0.272	5.7207	52.7353	29.8702	13.7206	13.6371	19.2126	19.5865
Tb927.1.3820	Tb927.1.3820	ATP synthase subunit, putative		Tb927.1.3820 | transcript=Tb927.1.3820 | gene=Tb927.1.3820 | organism=Trypanosoma_brucei_brucei_TREU927 | gene_product=ATP synthase subunit, putative | transcript_product=ATP synthase subunit, putative | location=Tb927_01_v5.1:815748-816149(+)	14.198	14.813	4884500	2	1	0	0	1	1	0	0	1	1	0	0	1	1	133	0	0	25.6	25.6	0	0	1969800	2914700	2.10694	0.00781741	0.348	5.72052	52.729	11.2437	13.8948	13.0487	18.9096	19.4749
Tb927.8.2310	Tb927.8.2310	(H+)-ATPase G subunit, putative		Tb927.8.2310 | transcript=Tb927.8.2310 | gene=Tb927.8.2310 | organism=Trypanosoma_brucei_brucei_TREU927 | gene_product=(H+)-ATPase G subunit, putative | transcript_product=(H+)-ATPase G subunit, putative | location=Tb927_08_v5.1:699549-699878(	12.749	4.014	3933700	2	1	0	0	1	1	0	0	1	1	0	0	1	1	109	0	0	12.8	12.8	0	0	1660200	2273500	1.70659	0.0196522	0.2088	4.89931	29.8427	7.02779	14.3277	13.0092	18.341	18.7946

## Sheet: C3Y_BSF_all_raw
Protein IDs	Majority protein IDs	Fasta headers	Mol. weight [kDa]	Score	Intensity	MS/MS count	Number of proteins	Peptides BSF_WT1	Peptides BSF_WT2	Peptides BSF_YFP1	Peptides BSF_YFP2	Razor + unique peptides BSF_WT1	Razor + unique peptides BSF_WT2	Razor + unique peptides BSF_YFP1	Razor + unique peptides BSF_YFP2	Unique peptides BSF_WT1	Unique peptides BSF_WT2	Unique peptides BSF_YFP1	Unique peptides BSF_YFP2	Sequence coverage BSF_WT1 [%]	Sequence coverage BSF_WT2 [%]	Sequence coverage BSF_YFP1 [%]	Sequence coverage BSF_YFP2 [%]	Sequence length	Intensity BSF_WT1	Intensity BSF_WT2	Intensity BSF_YFP1	Intensity BSF_YFP2	-Log Student's T-test p-value BSF_YFP_BSF_WT	p value	Student's T-test q-value BSF_YFP_BSF_WT	Student's T-test Difference BSF_YFP_BSF_WT	fold change	Student's T-test Test statistic BSF_YFP_BSF_WT	iBAQ BSF_WT1	iBAQ BSF_WT2	iBAQ BSF_YFP1	iBAQ BSF_YFP2
Tb927.7.5340	Tb927.7.5340	Tb927.7.5340 | transcript=Tb927.7.5340:mRNA | gene=Tb927.7.5340 | organism=Trypanosoma_brucei_brucei_TREU927 | gene_product=cAMP response protein 3 | transcript_product=cAMP response protein 3 | location=Tb927_07_v5.1:1419326-1420822(+) | protein_l	56.822	323.31	24739000000	220	1	1	1	34	44	1	1	34	44	1	1	34	44	3	2.2	59.4	72.1	498	891290	1167600	5773100000	13834000000	2.59711	0.00252864	0	13.0968	8760.53	4.92392	15.0651	15.4547	27.7262	28.9871
Tb927.7.7520	Tb927.7.7520	Tb927.7.7520 | transcript=Tb927.7.7520:mRNA | gene=Tb927.7.7520 | organism=Trypanosoma_brucei_brucei_TREU927 | gene_product=receptor-type adenylate cyclase GRESAG 4, putative | transcript_product=receptor-type adenylate cyclase GRESAG 4, putative |	137.88	132.71	867350000	48	1	0	0	36	61	0	0	11	31	0	0	0	0	0	0	26.2	39	1243	0	0	291740000	575610000	2.30928	0.00490596	0	8.07933	270.471	3.14617	14.7955	14.2217	22.0977	23.0782
Tb927.11.10910; Tb927.11.10790	Tb927.11.10910; Tb927.11.10790	Tb927.11.10910 | transcript=Tb927.11.10910:mRNA | gene=Tb927.11.10910 | organism=Trypanosoma_brucei_brucei_TREU927 | gene_product=40S ribosomal protein SA, putative | transcript_product=40S ribosomal protein SA, putative | location=Tb927_11_v5.1:29	27.609	195.21	151970000	26	2	1	3	2	1	1	3	2	1	1	3	2	1	3.3	14.8	14.8	7	244	8893800	9914100	4406900	4564400	2.22823	0.00591245	0.480821	-1.06604	0.477629	-0.511943	19.277	19.4337	18.264	18.3146
Tb927.4.4430	Tb927.4.4430	Tb927.4.4430 | transcript=Tb927.4.4430:mRNA | gene=Tb927.4.4430 | organism=Trypanosoma_brucei_brucei_TREU927 | gene_product=adenylyl cyclase | transcript_product=adenylyl cyclase | location=Tb927_04_v5.1:1177872-1181603(-) | protein_length=1243 | s	138.27	323.31	3837100000	159	1	0	0	46	70	0	0	46	70	0	0	2	6	0	0	32.7	45.9	1243	0	0	971410000	2838000000	2.20018	0.006307	0	9.8919	950.074	3.54635	14.579	14.8949	23.8555	25.4022
Tb927.6.310	Tb927.6.310	Tb927.6.310 | transcript=Tb927.6.310:mRNA | gene=Tb927.6.310 | organism=Trypanosoma_brucei_brucei_TREU927 | gene_product=receptor-type adenylate cyclase GRESAG 4, putative | transcript_product=receptor-type adenylate cyclase GRESAG 4, putative | lo	140.37	4.8635	111360000	2	1	0	0	11	13	0	0	1	1	0	0	1	1	0	0	5.2	6.2	1272	0	0	38444000	72913000	2.03127	0.00930526	0	5.14584	35.4041	2.05843	14.9758	14.5926	19.4683	20.3917
Tb927.8.7940; Tb11.v5.0821.1	Tb927.8.7940	Tb927.8.7940 | transcript=Tb927.8.7940:mRNA | gene=Tb927.8.7940 | organism=Trypanosoma_brucei_brucei_TREU927 | gene_product=receptor-type adenylate cyclase GRESAG 4, putative | transcript_product=receptor-type adenylate cyclase GRESAG 4, putative |	138.49	323.31	865910000	78	2	0	0	33	48	0	0	25	40	0	0	11	17	0	0	23.8	31	1250	0	0	215450000	650450000	2.01044	0.00976248	0	8.2624	307.064	2.92743	14.3978	13.9924	21.6604	23.2545
Tb927.4.4460	Tb927.4.4460	Tb927.4.4460 | transcript=Tb927.4.4460:mRNA | gene=Tb927.4.4460 | organism=Trypanosoma_brucei_brucei_TREU927 | gene_product=adenylyl cyclase | transcript_product=adenylyl cyclase | location=Tb927_04_v5.1:1191876-1195742(-) | protein_length=1288 | s	144.26	65.051	100340000	9	1	0	0	38	50	0	0	4	4	0	0	1	1	0	0	27.1	33.9	1288	0	0	39332000	61011000	1.95789	0.0110183	0	5.18676	36.4224	2.03483	13.7609	14.6578	19.0794	19.7128
Tb927.6.180; Tb11.v5.0456.1; Tb927.6.170; Tb11.v5.0431.1; Tb11.v5.0546.1; Tb927.6.320; Tb927.6.200; Tb11.v5.0425.1; Tb11.v5.0576.1; Tb927.6.790; Tb927.6.780; Tb927.6.770; Tb927.6.760; Tb927.6.430; Tb927.6.800	Tb927.6.180; Tb11.v5.0456.1; Tb927.6.170; Tb11.v5.0431.1; Tb11.v5.0546.1; Tb927.6.320; Tb927.6.200; Tb11.v5.0425.1; Tb11.v5.0576.1; Tb927.6.790; Tb927.6.780; Tb927.6.770; Tb927.6.760; Tb927.6.430; Tb927.6.800	Tb927.6.180 | transcript=Tb927.6.180:mRNA | gene=Tb927.6.180 | organism=Trypanosoma_brucei_brucei_TREU927 | gene_product=receptor-type adenylate cyclase GRESAG 4, putative | transcript_product=receptor-type adenylate cyclase GRESAG 4, putative | lo	140.36	10.945	100090000	4	15	0	0	12	14	0	0	1	2	0	0	0	0	0	0	6.4	7.8	1268	0	0	30152000	60800000	1.93057	0.0117335	0	4.70508	26.0837	1.8714	14.6476	14.8317	18.9389	19.9506
Tb927.4.4440	Tb927.4.4440	Tb927.4.4440 | transcript=Tb927.4.4440:mRNA | gene=Tb927.4.4440 | organism=Trypanosoma_brucei_brucei_TREU927 | gene_product=adenylyl cyclase | transcript_product=adenylyl cyclase | location=Tb927_04_v5.1:1182723-1186466(-) | protein_length=1247 | s	138.7	34.278	150020000	16	1	0	0	47	66	0	0	6	8	0	0	0	0	0	0	32.5	42.7	1247	0	0	48490000	101530000	1.92258	0.0119514	0	6.09568	68.3882	2.28094	14.3785	13.5587	19.5312	20.5973
Tb927.10.2910	Tb927.10.2910	Tb927.10.2910 | transcript=Tb927.10.2910:mRNA | gene=Tb927.10.2910 | organism=Trypanosoma_brucei_brucei_TREU927 | gene_product=splicing factor PTSR1 interacting protein | transcript_product=splicing factor PTSR1 interacting protein | location=Tb927	43.652	2.7519	12354000	5	1	0	0	1	1	0	0	1	1	0	0	1	1	0	0	4.5	4.5	378	0	0	3040200	5533700	1.787	0.0163305	0	3.66047	12.6448	1.47982	14.9163	14.5283	17.9508	18.8148
Tb927.9.15660; Tb09.v4.0009	Tb927.9.15660; Tb09.v4.0009	Tb927.9.15660 | transcript=Tb927.9.15660:mRNA | gene=Tb927.9.15660 | organism=Trypanosoma_brucei_brucei_TREU927 | gene_product=procyclic-enriched flagellar receptor adenylate cyclase 6 | transcript_product=procyclic-enriched flagellar receptor aden	137.52	21.301	52202000	2	2	0	0	2	2	0	0	1	1	0	0	1	1	0	0	2.3	2.3	1242	0	0	16671000	35531000	1.6657	0.0215925	0	3.65449	12.5925	1.43545	14.8413	14.8344	17.9464	19.0382
Tb927.4.4470; Tb927.5.650; Tb927.5.1450	Tb927.4.4470	Tb927.4.4470 | transcript=Tb927.4.4470:mRNA | gene=Tb927.4.4470 | organism=Trypanosoma_brucei_brucei_TREU927 | gene_product=adenylyl cyclase | transcript_product=adenylyl cyclase | location=Tb927_04_v5.1:1196301-1200116(-) | protein_length=1271 | s	141.96	33.601	80167000	9	3	0	0	36	48	0	0	4	5	0	0	1	2	0	0	27.6	36	1271	0	0	19593000	60574000	1.66036	0.0218596	0	5.74805	53.7448	2.00695	12.8921	13.4708	18.1153	19.7437
Tb927.8.7930	Tb927.8.7930	Tb927.8.7930 | transcript=Tb927.8.7930:mRNA | gene=Tb927.8.7930 | organism=Trypanosoma_brucei_brucei_TREU927 | gene_product=receptor-type adenylate cyclase GRESAG 4, putative | transcript_product=receptor-type adenylate cyclase GRESAG 4, putative |	140.94	42.249	89421000	8	1	0	0	25	34	0	0	2	5	0	0	0	0	0	0	20.9	31.1	1267	0	0	23445000	65976000	1.65208	0.0222801	0	5.06366	33.4436	1.82887	14.3725	14.0038	18.5055	19.9981
Tb927.11.13007; Tb927.11.13003; Tb11.v5.0537.1; Tb927.11.9920; Tb11.01.1680.v5.1	Tb927.11.13007; Tb927.11.13003; Tb11.v5.0537.1; Tb927.11.9920; Tb11.01.1680.v5.1	Tb927.11.13007 | transcript=Tb927.11.13007:mRNA | gene=Tb927.11.13007 | organism=Trypanosoma_brucei_brucei_TREU927 | gene_product=ubiquitin-60S ribosomal protein L40 | transcript_product=ubiquitin-60S ribosomal protein L40 | location=Tb927_11_v5.1:	14.656	9.2362	20101000	9	5	0	0	1	2	0	0	1	2	0	0	1	2	0	0	9.4	23.4	128	0	0	2037800	3570700	1.62632	0.023642	0	3.54999	11.7126	1.38902	14.8472	15.6093	18.3736	19.1828
Tb927.8.7920	Tb927.8.7920	Tb927.8.7920 | transcript=Tb927.8.7920:mRNA | gene=Tb927.8.7920 | organism=Trypanosoma_brucei_brucei_TREU927 | gene_product=receptor-type adenylate cyclase GRESAG 4, putative | transcript_product=receptor-type adenylate cyclase GRESAG 4, putative |	140.55	32.957	108020000	15	1	0	0	23	34	0	0	5	8	0	0	0	1	0	0	19.1	28.3	1264	0	0	24860000	83159000	1.39881	0.0399203	0	4.42161	21.4307	1.51896	14.7277	15.261	18.5449	20.287
Tb927.9.11270	Tb927.9.11270	Tb927.9.11270 | transcript=Tb927.9.11270:mRNA | gene=Tb927.9.11270 | organism=Trypanosoma_brucei_brucei_TREU927 | gene_product=t- complex protein 1 (eta subunit), putative | transcript_product=t- complex protein 1 (eta subunit), putative | location	61.471	10.559	28705000	7	1	0	0	2	3	0	0	2	3	0	0	2	3	0	0	4.4	6.2	568	0	0	5870800	14370000	1.31123	0.0488394	0	2.90341	7.48191	1.08893	15.3043	14.9756	17.3977	18.6891
Tb927.7.7530	Tb927.7.7530	Tb927.7.7530 | transcript=Tb927.7.7530:mRNA | gene=Tb927.7.7530 | organism=Trypanosoma_brucei_brucei_TREU927 | gene_product=receptor-type adenylate cyclase GRESAG 4, putative | transcript_product=receptor-type adenylate cyclase GRESAG 4, putative |	138.01	115.49	27870000	3	1	0	0	33	58	0	0	1	1	0	0	1	1	0	0	27.2	40	1243	0	0	9794200	18076000	1.2943	0.050781	0	2.86384	7.2795	1.07212	15.2407	14.2305	17.1574	18.0415
Tb927.9.2400	Tb927.9.2400	Tb927.9.2400 | transcript=Tb927.9.2400:mRNA | gene=Tb927.9.2400 | organism=Trypanosoma_brucei_brucei_TREU927 | gene_product=hypothetical protein, conserved | transcript_product=hypothetical protein, conserved | location=Tb927_09_v5.1:522081-522665(	21.661	17.305	36386000	7	1	0	0	2	3	0	0	2	3	0	0	2	3	0	0	17	23.7	194	0	0	6765700	29620000	1.26576	0.0542305	0	4.90737	30.0099	1.53748	15.7974	14.7279	19.1048	21.2351
Tb927.11.6440	Tb927.11.6440	Tb927.11.6440 | transcript=Tb927.11.6440:mRNA | gene=Tb927.11.6440 | organism=Trypanosoma_brucei_brucei_TREU927 | gene_product=hypothetical protein, conserved | transcript_product=hypothetical protein, conserved | location=Tb927_11_v5.1:1821094-182	48.841	14.487	62317000	16	1	1	2	1	1	1	2	1	1	1	2	1	1	3.4	5.9	3.4	2.5	441	2079800	2919800	1298900	1176900	1.22343	0.059782	0.6896	-0.994994	0.501738	-0.441268	16.6661	17.1555	15.987	15.8446
Tb11.v5.0470.1; Tb927.10.2430	Tb11.v5.0470.1; Tb927.10.2430	Tb11.v5.0470.1 | transcript=Tb11.v5.0470.1 | gene=Tb11.v5.0470 | organism=Trypanosoma_brucei_brucei_TREU927 | gene_product=receptor-type adenylate cyclase GRESAG 4, putative | transcript_product=receptor-type adenylate cyclase GRESAG 4, putative | locat	95.826	8.3296	127880000	5	2	0	0	8	9	0	0	1	3	0	0	1	3	0	0	3.9	4.4	862	0	0	24295000	103580000	1.21678	0.0607038	0	4.60405	24.3196	1.44364	16.2199	15.0885	19.2122	21.3043
Tb927.10.16190	Tb927.10.16190	Tb927.10.16190 | transcript=Tb927.10.16190:mRNA | gene=Tb927.10.16190 | organism=Trypanosoma_brucei_brucei_TREU927 | gene_product=procyclic-enriched flagellar receptor adenylate cyclase 2 | transcript_product=procyclic-enriched flagellar receptor a	137.9	34.578	57025000	9	1	0	0	3	7	0	0	3	7	0	0	1	1	0	0	3.2	6.3	1254	0	0	18005000	39020000	1.16154	0.0689379	0	4.03117	16.3495	1.29327	15.7635	13.828	18.269	19.3848
Tb927.11.7510; Tb927.11.7460	Tb927.11.7510; Tb927.11.7460	Tb927.11.7510 | transcript=Tb927.11.7510:mRNA | gene=Tb927.11.7510 | organism=Trypanosoma_brucei_brucei_TREU927 | gene_product=luminal binding protein 1 (BiP), putative | transcript_product=luminal binding protein 1 (BiP), putative | location=Tb927	71.434	36.215	68991000	24	2	3	3	6	13	3	3	6	13	3	3	6	13	7.5	8.6	13.6	28.5	653	2597900	2098800	11347000	52947000	1.0261	0.0941674	0	3.39189	10.4969	1.08656	16.139	15.8312	18.2659	20.4881
Tb927.3.3490	Tb927.3.3490	Tb927.3.3490 | transcript=Tb927.3.3490:mRNA | gene=Tb927.3.3490 | organism=Trypanosoma_brucei_brucei_TREU927 | gene_product=High mobility group protein TDP1 | transcript_product=High mobility group protein TDP1 | location=Tb927_03_v5.1:985621-98643	30.866	323.31	173790000	45	1	7	5	6	5	7	5	6	5	7	5	6	5	20.7	19.6	25.5	19.6	271	56505000	34300000	22181000	22694000	0.941925	0.114308	0.762894	-0.972507	0.50962	-0.411998	21.9445	21.2243	20.5954	20.6285
Tb927.3.4720	Tb927.3.4720	Tb927.3.4720 | transcript=Tb927.3.4720:mRNA | gene=Tb927.3.4720 | organism=Trypanosoma_brucei_brucei_TREU927 | gene_product=dynamin-1-like protein | transcript_product=dynamin-1-like protein | location=Tb927_03_v5.1:1334486-1336468(-) | protein_len	73.321	323.31	549660000	72	1	18	18	4	14	18	18	4	14	6	7	2	3	32.3	31.2	8.3	26.4	660	238420000	196220000	18120000	71139000	0.915259	0.121546	0.106783	-2.59079	0.165995	-0.864611	22.4027	22.1216	18.6848	20.6579
Tb927.9.13990	Tb927.9.13990	Tb927.9.13990 | transcript=Tb927.9.13990:mRNA | gene=Tb927.9.13990 | organism=Trypanosoma_brucei_brucei_TREU927 | gene_product=RNA-binding protein, putative | transcript_product=RNA-binding protein, putative | location=Tb927_09_v5.1:2186949-2187866	34.618	43.346	58469000	18	1	2	2	1	2	2	2	1	2	2	2	1	2	10.2	10.2	4.3	10.2	305	4262500	5105100	1327800	2673500	0.88983	0.128875	0.481474	-1.30794	0.403896	-0.518747	17.8534	18.1136	16.1707	17.1804
Tb927.9.2520; Tb11.v5.0868.1	Tb927.9.2520; Tb11.v5.0868.1	Tb927.9.2520 | transcript=Tb927.9.2520:mRNA | gene=Tb927.9.2520 | organism=Trypanosoma_brucei_brucei_TREU927 | gene_product=microtubule-associated protein | transcript_product=microtubule-associated protein | location=Tb927_09_v5.1:534345-558989(-)	928.36	3.5196	9426900	3	2	0	1	1	1	0	1	1	1	0	1	1	1	0	0.2	2	2	8214	0	5460600	1349300	2616900	0.884162	0.130568	0.11648	-2.35642	0.195275	-0.799644	15.2573	13.6224	11.6056	12.5612
Tb927.11.11330; Tb11.v5.1035.1; Tb927.7.710; Tb11.v5.1034.1	Tb927.11.11330; Tb11.v5.1035.1	Tb927.11.11330 | transcript=Tb927.11.11330:mRNA | gene=Tb927.11.11330 | organism=Trypanosoma_brucei_brucei_TREU927 | gene_product=heat shock protein 70 | transcript_product=heat shock protein 70 | location=Tb927_11_v5.1:3028681-3030666(+) | protein	71.408	45.217	93911000	34	4	3	3	2	8	3	3	2	8	1	2	1	3	7	7	5.9	14.7	661	4661600	7696300	12393000	32523000	0.806643	0.156084	0.3064	1.74489	3.3517	0.626681	17.065	17.7883	18.4755	19.8675
Tb927.1.2550; Tb927.1.2530; Tb927.1.2510; Tb927.1.2490; Tb927.1.2470; Tb927.1.2450; Tb927.1.2430; Tb927.10.15350	Tb927.1.2550; Tb927.1.2530; Tb927.1.2510; Tb927.1.2490; Tb927.1.2470; Tb927.1.2450; Tb927.1.2430	Tb927.1.2550 | transcript=Tb927.1.2550:mRNA | gene=Tb927.1.2550 | organism=Trypanosoma_brucei_brucei_TREU927 | gene_product=histone H3, putative | transcript_product=histone H3, putative | location=Tb927_01_v5.1:602011-602412(+) | protein_length=13	14.75	323.31	1619400000	71	8	3	3	3	1	3	3	3	1	3	3	3	1	19.5	30.1	19.5	9.8	133	57330000	36950000	22719000	8358600	0.801693	0.157873	0.28725	-1.7398	0.299412	-0.624074	22.9654	22.3317	21.6301	20.1875
Tb11.v5.0864.1	Tb11.v5.0864.1	Tb11.v5.0864.1 | transcript=Tb11.v5.0864.1 | gene=Tb11.v5.0864 | organism=Trypanosoma_brucei_brucei_TREU927 | gene_product=receptor-type adenylate cyclase GRESAG 4, putative | transcript_product=receptor-type adenylate cyclase GRESAG 4, putative | locat	23.031	9.1637	17687000	4	1	0	0	6	7	0	0	1	2	0	0	1	2	0	0	36.5	36.9	203	0	0	1636800	16050000	0.7916	0.161585	0	3.58855	12.0299	0.983285	15.1462	15.3363	17.183	20.4766
Tb927.8.6160; Tb927.8.6150	Tb927.8.6160; Tb927.8.6150	Tb927.8.6160 | transcript=Tb927.8.6160:mRNA | gene=Tb927.8.6160 | organism=Trypanosoma_brucei_brucei_TREU927 | gene_product=40S ribosomal protein S8, putative | transcript_product=40S ribosomal protein S8, putative | location=Tb927_08_v5.1:1796603-	24.937	87.873	211860000	42	2	4	4	2	2	4	4	2	2	4	4	2	2	33.2	33.2	15.5	18.6	220	8567600	6397500	3127500	5094100	0.79086	0.16186	0.862519	-0.891274	0.539138	-0.369801	20.2231	19.8017	18.7692	19.473
Tb927.5.4260; Tb927.5.4250; Tb927.5.4240; Tb927.5.4230; Tb927.5.4220; Tb927.5.4210; Tb927.5.4200; Tb927.5.4190; Tb927.5.4180; Tb927.5.4170	Tb927.5.4260; Tb927.5.4250; Tb927.5.4240; Tb927.5.4230; Tb927.5.4220; Tb927.5.4210; Tb927.5.4200; Tb927.5.4190; Tb927.5.4180; Tb927.5.4170	Tb927.5.4260 | transcript=Tb927.5.4260:mRNA | gene=Tb927.5.4260 | organism=Trypanosoma_brucei_brucei_TREU927 | gene_product=histone H4, putative | transcript_product=histone H4, putative | location=Tb927_05_v5.1:1334708-1335010(-) | protein_length=	11.142	278.14	1309800000	81	10	6	7	5	1	6	7	5	1	4	5	3	1	46	54	38	14	100	58527000	55612000	20796000	3584200	0.782816	0.164886	0.121333	-2.72423	0.15133	-0.833394	23.8026	23.7289	22.3098	19.7732
Tb927.10.9840	Tb927.10.9840	Tb927.10.9840 | transcript=Tb927.10.9840:mRNA | gene=Tb927.10.9840 | organism=Trypanosoma_brucei_brucei_TREU927 | gene_product=chaperone protein DnaJ, putative | transcript_product=chaperone protein DnaJ, putative | location=Tb927_10_v5.1:2433556-2	29.823	16.603	63194000	23	1	2	2	2	3	2	2	2	3	2	2	2	3	13	7.3	12.6	19.1	262	4390600	3450800	5729700	10813000	0.759795	0.173862	0.767833	1.01592	2.02219	0.408006	18.066	17.7185	18.45	19.3663
Tb927.3.3270	Tb927.3.3270	Tb927.3.3270 | transcript=Tb927.3.3270:mRNA | gene=Tb927.3.3270 | organism=Trypanosoma_brucei_brucei_TREU927 | gene_product=ATP-dependent 6-phosphofructokinase, glycosomal | transcript_product=ATP-dependent 6-phosphofructokinase, glycosomal | locat	53.517	139.96	268050000	82	1	8	14	4	1	8	14	4	1	8	14	4	1	24.4	33.5	11.1	3.3	487	10923000	46044000	4802500	324760	0.700871	0.199126	0	-4.1665	0.0556875	-0.991335	18.737	20.8127	17.5515	13.6652
Tb927.9.5860; Tb927.9.5770	Tb927.9.5860; Tb927.9.5770	Tb927.9.5860 | transcript=Tb927.9.5860:mRNA | gene=Tb927.9.5860 | organism=Trypanosoma_brucei_brucei_TREU927 | gene_product=tryparedoxin peroxidase | transcript_product=tryparedoxin peroxidase | location=Tb927_09_v5.1:989953-990552(+) | protein_len	22.424	167.24	318210000	53	2	5	4	3	3	5	4	3	3	5	4	3	3	32.7	27.6	27.6	23.6	199	20303000	22570000	11365000	17514000	0.69475	0.201953	1	-0.601493	0.659072	-0.259135	20.5747	20.7275	19.7377	20.3615
Tb927.11.13740	Tb927.11.13740	Tb927.11.13740 | transcript=Tb927.11.13740:mRNA | gene=Tb927.11.13740 | organism=Trypanosoma_brucei_brucei_TREU927 | gene_product=procyclic-enriched flagellar receptor adenylate cyclase 5 | transcript_product=procyclic-enriched flagellar receptor a	133.78	107.12	119320000	26	1	0	0	3	3	0	0	0	1	0	0	0	0	0	0	2	3	1214	0	0	0	3457200	0.683902	0.207061	1	0.255144	1.19345	0.119302	15.7288	15.8402	15.9127	16.1666
Tb927.6.4300; Tb927.6.4280	Tb927.6.4300; Tb927.6.4280	Tb927.6.4300 | transcript=Tb927.6.4300:mRNA | gene=Tb927.6.4300 | organism=Trypanosoma_brucei_brucei_TREU927 | gene_product=glyceraldehyde 3-phosphate dehydrogenase, glycosomal | transcript_product=glyceraldehyde 3-phosphate dehydrogenase, glycosom	39.047	210.93	977610000	119	2	17	19	12	14	17	19	12	14	17	19	12	14	54.3	61.3	42.6	43.7	359	247790000	246250000	60638000	165410000	0.670018	0.213787	0.610537	-1.30244	0.405441	-0.478157	23.3609	23.3521	21.3302	22.7779
Tb927.10.1100; Tb927.6.4690	Tb927.10.1100; Tb927.6.4690	Tb927.10.1100 | transcript=Tb927.10.1100:mRNA | gene=Tb927.10.1100 | organism=Trypanosoma_brucei_brucei_TREU927 | gene_product=60S ribosomal protein L9, putative | transcript_product=60S ribosomal protein L9, putative | location=Tb927_10_v5.1:29172	21.857	230.7	283290000	56	2	5	4	2	5	5	4	2	5	5	4	2	5	39.7	37.6	13.2	39.2	189	19144000	17600000	6531100	14197000	0.619256	0.240294	0.876509	-0.930773	0.524577	-0.363109	20.731	20.6096	19.1795	20.2996
Tb927.10.190	Tb927.10.190	Tb927.10.190 | transcript=Tb927.10.190:mRNA | gene=Tb927.10.190 | organism=Trypanosoma_brucei_brucei_TREU927 | gene_product=40S ribosomal protein S6, putative | transcript_product=40S ribosomal protein S6, putative | location=Tb927_10_v5.1:73558-74	28.44	4.9898	29586000	6	1	1	3	1	4	1	1	1	0	1	1	1	0	3.6	13.2	3.6	16	250	2706400	2500800	1828700	0	0.585262	0.259859	0.5894	-1.41732	0.374407	-0.486961	18.198	18.0841	17.6325	15.815
Tb927.7.2940; Tb927.7.2930; Tb927.7.2920; Tb927.7.2910; Tb927.7.2900; Tb927.7.2890; Tb927.7.2880; Tb927.7.2870; Tb927.7.2860; Tb927.7.2850; Tb927.7.2840; Tb927.7.2830; Tb927.7.2820	Tb927.7.2940; Tb927.7.2930; Tb927.7.2920; Tb927.7.2910; Tb927.7.2900; Tb927.7.2890; Tb927.7.2880; Tb927.7.2870; Tb927.7.2860; Tb927.7.2850; Tb927.7.2840; Tb927.7.2830; Tb927.7.2820	Tb927.7.2940 | transcript=Tb927.7.2940:mRNA | gene=Tb927.7.2940 | organism=Trypanosoma_brucei_brucei_TREU927 | gene_product=histone H2A, putative | transcript_product=histone H2A, putative | location=Tb927_07_v5.1:739893-740297(+) | protein_length=	14.212	323.31	4311100000	86	13	5	4	4	2	5	4	4	2	5	4	4	2	21.6	21.6	21.6	21.6	134	152360000	118380000	74602000	7876200	0.569686	0.269348	0.235852	-2.46996	0.180496	-0.680051	24.5979	24.2339	23.5678	20.3241
Tb927.11.9730; Tb927.10.12680	Tb927.11.9730; Tb927.10.12680	Tb927.11.9730 | transcript=Tb927.11.9730:mRNA | gene=Tb927.11.9730 | organism=Trypanosoma_brucei_brucei_TREU927 | gene_product=60S ribosomal protein L34, putative | transcript_product=60S ribosomal protein L34, putative | location=Tb927_11_v5.1:263	19.336	168.51	310780000	36	2	2	2	2	7	2	2	2	7	2	2	2	7	14.7	14.1	12.9	32.4	170	10195000	10565000	15378000	75925000	0.561943	0.274193	0.467459	1.71913	3.29237	0.545388	21.6964	21.7479	22.2894	24.5931
Tb927.10.10590; Tb927.10.10580; Tb927.10.10570; Tb927.10.10560; Tb927.10.10550; Tb927.10.10540; Tb927.10.10530; Tb927.10.10520; Tb927.10.10510; Tb927.10.10500; Tb927.10.10490; Tb927.10.10480; Tb927.10.10470; Tb927.10.10460; Tb927.10.10445	Tb927.10.10590; Tb927.10.10580; Tb927.10.10570; Tb927.10.10560; Tb927.10.10550; Tb927.10.10540; Tb927.10.10530; Tb927.10.10520; Tb927.10.10510; Tb927.10.10500; Tb927.10.10490; Tb927.10.10480; Tb927.10.10470; Tb927.10.10460; Tb927.10.10445	Tb927.10.10590 | transcript=Tb927.10.10590:mRNA | gene=Tb927.10.10590 | organism=Trypanosoma_brucei_brucei_TREU927 | gene_product=histone H2B, putative | transcript_product=histone H2B, putative | location=Tb927_10_v5.1:2584907-2585245(-) | protein	12.569	323.31	5369200000	89	15	7	7	7	1	7	7	7	1	7	7	7	1	60.7	56.2	60.7	8	112	165620000	150120000	90837000	7747400	0.545354	0.284869	0.244923	-2.57135	0.168247	-0.680758	24.3033	24.1615	23.4368	19.8853
Tb927.10.5620; Tb11.v5.0531.1	Tb927.10.5620; Tb11.v5.0531.1	Tb927.10.5620 | transcript=Tb927.10.5620:mRNA | gene=Tb927.10.5620 | organism=Trypanosoma_brucei_brucei_TREU927 | gene_product=fructose-bisphosphate aldolase, glycosomal | transcript_product=fructose-bisphosphate aldolase, glycosomal | location=Tb9	41.071	13.985	44050000	11	2	5	3	1	2	5	3	1	2	5	3	1	2	14.8	9.7	3.8	6.5	372	20279000	10577000	3172900	10021000	0.544539	0.285405	0.607442	-1.37706	0.385002	-0.466293	19.8812	18.9421	17.205	18.8641
Tb927.10.7340; Tb927.10.7330	Tb927.10.7340; Tb927.10.7330	Tb927.10.7340 | transcript=Tb927.10.7340:mRNA | gene=Tb927.10.7340 | organism=Trypanosoma_brucei_brucei_TREU927 | gene_product=40S ribosomal protein S24E, putative | transcript_product=40S ribosomal protein S24E, putative | location=Tb927_10_v5.1:1	15.683	153.79	145320000	32	2	4	3	1	2	4	3	1	2	4	3	1	2	38.7	24.8	11.7	15.3	137	14300000	8766000	654980	6648700	0.534868	0.291831	0.26	-2.42362	0.186387	-0.653512	22.1845	21.4785	17.7362	21.0797
Tb927.10.8980	Tb927.10.8980	Tb927.10.8980 | transcript=Tb927.10.8980:mRNA | gene=Tb927.10.8980 | organism=Trypanosoma_brucei_brucei_TREU927 | gene_product=hypothetical protein, conserved | transcript_product=hypothetical protein, conserved | location=Tb927_10_v5.1:2227157-222	17.598	11.459	34646000	12	1	3	2	4	3	3	2	4	3	3	2	4	3	19.5	18.9	25.4	17.2	169	8627000	5552800	8530000	11936000	0.513416	0.306608	1	0.543872	1.45788	0.226647	20.233	19.5974	20.2168	20.7014
Tb927.7.2370; Tb927.7.2340	Tb927.7.2370; Tb927.7.2340	Tb927.7.2370 | transcript=Tb927.7.2370:mRNA | gene=Tb927.7.2370 | organism=Trypanosoma_brucei_brucei_TREU927 | gene_product=40S ribosomal protein S15, putative | transcript_product=40S ribosomal protein S15, putative | location=Tb927_07_v5.1:611294	17.474	126.02	308950000	44	2	3	3	4	4	3	3	4	4	3	3	4	4	24.3	24.3	39.5	39.5	152	15069000	15152000	59373000	18127000	0.493058	0.321323	0.80624	1.11845	2.17114	0.391637	21.2601	21.268	23.2384	21.5267
Tb927.10.5030; Tb927.7.3680	Tb927.10.5030; Tb927.7.3680	Tb927.10.5030 | transcript=Tb927.10.5030:mRNA | gene=Tb927.10.5030 | organism=Trypanosoma_brucei_brucei_TREU927 | gene_product=ubiquitin/ribosomal protein S27a, putative | transcript_product=ubiquitin/ribosomal protein S27a, putative | location=Tb9	16.705	17.674	56121000	11	2	2	1	1	1	2	1	1	1	2	1	1	1	21.9	8.6	8.6	8.6	151	7022000	4394400	0	3607700	0.489533	0.323942	0.251034	-2.58966	0.166125	-0.648092	20.1584	19.4823	15.2637	19.1977
Tb927.6.280; Tb927.6.330	Tb927.6.280; Tb927.6.330	Tb927.6.280 | transcript=Tb927.6.280:mRNA | gene=Tb927.6.280 | organism=Trypanosoma_brucei_brucei_TREU927 | gene_product=receptor-type adenylate cyclase GRESAG 4, putative | transcript_product=receptor-type adenylate cyclase GRESAG 4, putative | lo	140.63	16.798	14073000	5	2	0	0	12	15	0	0	2	3	0	0	1	1	0	0	6.7	8	1268	0	0	3236100	10836000	0.482741	0.329048	0.801098	1.12031	2.17394	0.38961	15.4896	15.6503	15.8185	17.562
Tb927.1.3830	Tb927.1.3830	Tb927.1.3830 | transcript=Tb927.1.3830:mRNA | gene=Tb927.1.3830 | organism=Trypanosoma_brucei_brucei_TREU927 | gene_product=glucose-6-phosphate isomerase, glycosomal | transcript_product=glucose-6-phosphate isomerase, glycosomal | location=Tb927_01	67.614	3.2078	4183500	6	1	2	1	1	1	2	1	1	1	2	1	1	1	4.3	1.8	1.8	1.8	607	2340400	704210	343670	795180	0.462447	0.344789	0.694435	-1.29619	0.407201	-0.42404	16.351	14.6183	13.5833	14.7936
Tb927.9.6560	Tb927.9.6560	Tb927.9.6560 | transcript=Tb927.9.6560:mRNA | gene=Tb927.9.6560 | organism=Trypanosoma_brucei_brucei_TREU927 | gene_product=NAK family pseudokinase, putative | transcript_product=NAK family pseudokinase, putative | location=Tb927_09_v5.1:1077469-10	80.198	65.812	103530000	21	1	5	0	4	8	5	0	4	8	5	0	4	8	13.1	0	9.1	15.8	726	24651000	0	26063000	45606000	0.45511	0.350663	0.296516	2.59376	6.03669	0.625296	19.6482	15.4287	19.7286	20.5358
Tb927.10.1090; Tb927.10.1080	Tb927.10.1090; Tb927.10.1080	Tb927.10.1090 | transcript=Tb927.10.1090:mRNA | gene=Tb927.10.1090 | organism=Trypanosoma_brucei_brucei_TREU927 | gene_product=40S ribosomal protein S23, putative | transcript_product=40S ribosomal protein S23, putative | location=Tb927_10_v5.1:290	15.928	41.96	234890000	40	2	3	3	1	3	3	3	1	3	3	3	1	3	25.9	23.8	8.4	25.2	143	18368000	15199000	1075400	13084000	0.449243	0.355432	0.358857	-2.15519	0.224504	-0.56602	21.3233	21.0501	17.2291	20.834
Tb927.7.6040; Tb927.7.6060; Tb927.7.6050; Tb927.7.6080	Tb927.7.6040; Tb927.7.6060; Tb927.7.6050; Tb927.7.6080	Tb927.7.6040 | transcript=Tb927.7.6040:mRNA | gene=Tb927.7.6040 | organism=Trypanosoma_brucei_brucei_TREU927 | gene_product=receptor-type adenylate cyclase GRESAG 4, putative | transcript_product=receptor-type adenylate cyclase GRESAG 4, putative |	139.46	12.094	9449900	4	4	0	0	3	8	0	0	0	5	0	0	0	1	0	0	1.6	7.4	1267	0	0	0	9449900	0.438977	0.363935	0.608952	1.55996	2.94845	0.46731	14.709	14.1354	14.6751	17.2892
Tb927.10.14550	Tb927.10.14550	Tb927.10.14550 | transcript=Tb927.10.14550:mRNA | gene=Tb927.10.14550 | organism=Trypanosoma_brucei_brucei_TREU927 | gene_product=ATP-dependent RNA helicase HEL67 | transcript_product=ATP-dependent RNA helicase HEL67 | location=Tb927_10_v5.1:356501	66.588	113.26	140270000	27	1	1	1	1	2	1	1	1	2	1	1	1	2	3.9	3.9	3.9	6.3	618	1924600	2376700	2244100	8556900	0.397205	0.400677	0.895298	1.03486	2.04891	0.347572	15.6282	15.9326	15.8498	17.7807
Tb927.9.7620; Tb927.9.7590	Tb927.9.7620; Tb927.9.7590	Tb927.9.7620 | transcript=Tb927.9.7620:mRNA | gene=Tb927.9.7620 | organism=Trypanosoma_brucei_brucei_TREU927 | gene_product=60S ribosomal protein L11, putative | transcript_product=60S ribosomal protein L11, putative | location=Tb927_09_v5.1:124827	22.369	63.207	106050000	36	2	0	2	2	4	0	2	2	4	0	2	2	4	0	13.9	12.4	26.8	194	0	7560700	4947800	14192000	0.378105	0.418692	0.44	2.42438	5.36799	0.551048	15.4907	20.0427	19.431	20.9512
Tb927.7.5180; Tb927.7.5170	Tb927.7.5180; Tb927.7.5170	Tb927.7.5180 | transcript=Tb927.7.5180:mRNA | gene=Tb927.7.5180 | organism=Trypanosoma_brucei_brucei_TREU927 | gene_product=60S ribosomal protein L23a, putative | transcript_product=60S ribosomal protein L23a, putative | location=Tb927_07_v5.1:1364	18.17	248.23	274920000	44	2	4	5	1	4	4	5	1	4	4	5	1	4	25	34.8	6.1	32.9	164	16408000	18522000	1890400	17333000	0.375473	0.421237	0.692909	-1.60666	0.328357	-0.446199	21.383	21.5578	18.2653	21.4621
Tb927.8.6850	Tb927.8.6850	Tb927.8.6850 | transcript=Tb927.8.6850:mRNA | gene=Tb927.8.6850 | organism=Trypanosoma_brucei_brucei_TREU927 | gene_product=Zinc finger, C3HC4 type (RING finger)/EF-hand domain pair, putative | transcript_product=Zinc finger, C3HC4 type (RING finge	32.389	2.468	3739500	2	1	1	0	1	1	1	0	1	1	1	0	1	1	4.2	0	4.2	4.2	286	1248200	0	1211500	1279900	0.372793	0.423845	0.813388	1.3024	2.46639	0.393896	16.444	13.8323	16.401	16.4802
Tb927.8.7910	Tb927.8.7910	Tb927.8.7910 | transcript=Tb927.8.7910 | gene=Tb927.8.7910 | organism=Trypanosoma_brucei_brucei_TREU927 | gene_product=receptor-type adenylate cyclase GRESAG 4, frameshift | transcript_product=receptor-type	128.32	2.216	55103000	2	1	0	0	14	24	0	0	0	1	0	0	0	1	0	0	13.7	22.7	1184	0	0	0	55103000	0.367932	0.428616	0.306182	3.03475	8.19504	0.597138	13.1587	15.3214	14.3885	20.161
Tb927.2.4510	Tb927.2.4510	Tb927.2.4510 | transcript=Tb927.2.4510:mRNA | gene=Tb927.2.4510 | organism=Trypanosoma_brucei_brucei_TREU927 | gene_product=cdc2-related kinase 9 | transcript_product=cdc2-related kinase 9 | location=Tb927_02_v5.1:798058-800382(-) | protein_length=	85.591	14.562	24446000	11	1	2	2	2	4	2	2	2	4	2	2	2	4	2.6	4.3	4.3	7.2	774	3350400	3097700	3139400	9073200	0.353677	0.442917	1	0.728247	1.65662	0.263129	16.6315	16.5184	16.5376	18.0688
Tb927.11.14900	Tb927.11.14900	Tb927.11.14900 | transcript=Tb927.11.14900:mRNA | gene=Tb927.11.14900 | organism=Trypanosoma_brucei_brucei_TREU927 | gene_product=coatomer subunit epsilon | transcript_product=coatomer subunit epsilon | location=Tb927_11_v5.1:3955731-3956705(-) | p	34.594	5.6487	8644400	8	1	1	0	1	1	1	0	1	1	1	0	1	1	3.1	0	3.4	7.1	324	0	0	0	3478000	0.339381	0.45774	0.822462	1.32479	2.50496	0.383831	14.6873	14.8868	14.6638	17.5599
Tb927.10.6060; Tb11.v5.0199.1	Tb927.10.6060; Tb11.v5.0199.1	Tb927.10.6060 | transcript=Tb927.10.6060:mRNA | gene=Tb927.10.6060 | organism=Trypanosoma_brucei_brucei_TREU927 | gene_product=universal minicircle sequence binding protein 2 | transcript_product=universal minicircle sequence binding protein 2 | lo	21.836	202.72	737640000	87	2	7	6	7	9	7	6	7	9	6	5	6	8	58.7	54	62	75.1	213	81245000	38245000	62374000	122800000	0.33053	0.467165	1	0.650811	1.57005	0.238318	22.3689	21.2819	21.9876	22.9648
Tb927.1.3180	Tb927.1.3180	Tb927.1.3180 | transcript=Tb927.1.3180:mRNA | gene=Tb927.1.3180 | organism=Trypanosoma_brucei_brucei_TREU927 | gene_product=40S ribosomal protein S11, putative | transcript_product=40S ribosomal protein S11, putative | location=Tb927_01_v5.1:688963	20.059	86.844	131470000	18	1	7	9	4	10	2	2	1	2	2	2	1	2	47.1	48.9	36.2	55.7	174	11060000	17004000	1961700	15189000	0.32671	0.471292	0.837736	-1.32898	0.39805	-0.37877	20.2289	20.8494	17.7338	20.6866
Tb927.9.15190	Tb927.9.15190	Tb927.9.15190 | transcript=Tb927.9.15190:mRNA | gene=Tb927.9.15190 | organism=Trypanosoma_brucei_brucei_TREU927 | gene_product=ribosomal protein L15, putative | transcript_product=ribosomal protein L15, putative | location=Tb927_09_v5.1:2361569-236	24.401	1.8133	2707300	2	1	4	5	3	5	0	1	0	0	0	1	0	0	16.7	22.1	13.2	22.5	204	0	1029500	0	0	0.326698	0.471305	0.870571	-1.18531	0.439731	-0.354286	14.5715	17.1661	14.3262	15.0409
Tb927.9.15210	Tb927.9.15210	Tb927.9.15210 | transcript=Tb927.9.15210:mRNA | gene=Tb927.9.15210 | organism=Trypanosoma_brucei_brucei_TREU927 | gene_product=ribosomal protein L36, putative | transcript_product=ribosomal protein L36, putative | location=Tb927_09_v5.1:2362520-236	12.457	66.229	111040000	18	1	2	0	1	3	2	0	1	3	0	0	0	1	23.9	0	12.8	27.5	109	11758000	0	4645300	16683000	0.32394	0.474307	0.324	3.61669	12.2668	0.589195	22.4872	14.4186	21.1473	22.9918
Tb927.11.7685; Tb927.11.7675	Tb927.11.7685; Tb927.11.7675	Tb927.11.7685 | transcript=Tb927.11.7685:mRNA | gene=Tb927.11.7685 | organism=Trypanosoma_brucei_brucei_TREU927 | gene_product=ribosomal protein S10p/S20 | transcript_product=ribosomal protein S10p/S20 | location=Tb927_11_v5.1:2176931-2177284(-) |	13.354	181.62	192000000	27	2	4	4	3	5	4	4	3	5	4	4	3	5	27.4	34.2	21.4	30.8	117	29012000	27458000	26494000	72787000	0.323764	0.4745	1	0.637715	1.55586	0.23359	22.4682	22.3888	22.3372	23.7952
Tb927.10.3500	Tb927.10.3500	Tb927.10.3500 | transcript=Tb927.10.3500:mRNA | gene=Tb927.10.3500 | organism=Trypanosoma_brucei_brucei_TREU927 | gene_product=splicing factor u2af 65 kda subunit | transcript_product=splicing factor u2af 65 kda subunit | location=Tb927_10_v5.1:899	96.56	24.154	28164000	15	1	2	1	1	4	2	1	1	4	2	1	1	4	2.8	1.5	2.4	4.1	878	2518600	1423700	1761400	9557600	0.320943	0.477592	0.923525	1.11553	2.16674	0.339323	15.9423	15.1193	15.4263	17.8663
Tb927.6.3100	Tb927.6.3100	Tb927.6.3100 | transcript=Tb927.6.3100:mRNA | gene=Tb927.6.3100 | organism=Trypanosoma_brucei_brucei_TREU927 | gene_product=Intraflagellar transport complex B protein 46 C terminal, putative | transcript_product=Intraflagellar transport complex B p	48.134	4.7022	2825500	2	1	0	0	1	1	0	0	1	1	0	0	1	1	0	0	3.9	5.1	435	0	0	757790	2067700	0.298266	0.503193	1	0.587969	1.50313	0.215667	15.2189	15.3316	15.1391	16.5873
Tb927.10.14140; Tb11.v5.0605.1	Tb927.10.14140; Tb11.v5.0605.1	Tb927.10.14140 | transcript=Tb927.10.14140:mRNA | gene=Tb927.10.14140 | organism=Trypanosoma_brucei_brucei_TREU927 | gene_product=pyruvate kinase 1 | transcript_product=pyruvate kinase 1 | location=Tb927_10_v5.1:3434635-3436134(-) | protein_length=	54.423	99.242	60507000	12	2	4	4	2	3	4	4	2	3	4	4	2	3	11.6	12.8	8.8	9.2	499	13439000	22743000	5426900	18898000	0.297029	0.504627	1	-0.787706	0.579264	-0.264621	18.9795	19.7385	17.6713	19.4713
Tb927.8.3530	Tb927.8.3530	Tb927.8.3530 | transcript=Tb927.8.3530:mRNA | gene=Tb927.8.3530 | organism=Trypanosoma_brucei_brucei_TREU927 | gene_product=glycerol-3-phosphate dehydrogenase [NAD+], glycosomal | transcript_product=glycerol-3-phosphate dehydrogenase [NAD+], glycos	37.805	323.31	1227500000	103	1	11	11	8	8	11	11	8	8	11	11	8	8	35	33.9	23.2	25.7	354	155340000	168220000	80848000	174420000	0.293608	0.508619	1	-0.44495	0.73461	-0.173968	23.2109	23.3258	22.2687	23.3781
Tb927.4.3060	Tb927.4.3060	Tb927.4.3060 | transcript=Tb927.4.3060:mRNA | gene=Tb927.4.3060 | organism=Trypanosoma_brucei_brucei_TREU927 | gene_product=hypothetical protein, conserved | transcript_product=hypothetical protein, conserved | location=Tb927_04_v5.1:810076-810522(	17.732	1.7485	9412700	5	1	0	1	1	1	0	1	1	1	0	1	1	1	0	6.1	6.1	6.1	148	0	1440300	963660	1429500	0.291416	0.511192	0.904966	1.2274	2.34144	0.345846	15.4126	18.4579	17.8782	18.4471
Tb927.11.11830; Tb927.11.11820	Tb927.11.11830; Tb927.11.11820	Tb927.11.11830 | transcript=Tb927.11.11830:mRNA | gene=Tb927.11.11830 | organism=Trypanosoma_brucei_brucei_TREU927 | gene_product=40S ribosomal protein S17, putative | transcript_product=40S ribosomal protein S17, putative | location=Tb927_11_v5.1:	16.222	80.992	461880000	63	2	7	7	5	6	7	7	5	6	7	7	5	6	38.7	39.4	33.1	34.5	142	48862000	48506000	32399000	51238000	0.285178	0.518587	1	-0.256858	0.836909	-0.110207	22.9572	22.9467	22.3645	23.0258
Tb927.11.3240	Tb927.11.3240	Tb927.11.3240 | transcript=Tb927.11.3240:mRNA | gene=Tb927.11.3240 | organism=Trypanosoma_brucei_brucei_TREU927 | gene_product=T-complex protein 1, zeta subunit, putative | transcript_product=T-complex protein 1, zeta subunit, putative | location=T	59.579	23.535	42244000	20	1	1	2	1	4	1	2	1	4	1	2	1	4	2.6	6.2	2.6	9.7	544	2991200	3131600	2604200	10897000	0.284055	0.51993	1	0.799508	1.74051	0.2636	16.6054	16.6716	16.4055	18.4705
Tb927.3.1120	Tb927.3.1120	Tb927.3.1120 | transcript=Tb927.3.1120:mRNA | gene=Tb927.3.1120 | organism=Trypanosoma_brucei_brucei_TREU927 | gene_product=GTP-binding nuclear protein rtb2, putative | transcript_product=GTP-binding nuclear protein rtb2, putative | location=Tb927_	24.406	36.781	113350000	38	1	4	3	4	7	4	3	4	7	4	3	4	7	27.6	16.1	18.9	36.9	217	12181000	6795200	8236500	30192000	0.283455	0.52065	1	0.793504	1.73328	0.262118	19.9532	19.1111	19.3886	21.2627
Tb927.11.3600; Tb927.11.3590; Tb11.v5.1059.1	Tb927.11.3600; Tb927.11.3590; Tb11.v5.1059.1	Tb927.11.3600 | transcript=Tb927.11.3600:mRNA | gene=Tb927.11.3600 | organism=Trypanosoma_brucei_brucei_TREU927 | gene_product=40S ribosomal protein S4, putative | transcript_product=40S ribosomal protein S4, putative | location=Tb927_11_v5.1:10633	30.644	111.15	363380000	75	3	8	6	2	8	8	6	2	8	8	6	2	8	31.1	37.7	12.1	34.4	273	35428000	24353000	4492800	36876000	0.283178	0.520981	0.908133	-1.19032	0.438206	-0.336022	20.9084	20.3677	17.9293	20.9663
Tb927.11.4820; Tb927.10.14580	Tb927.11.4820; Tb927.10.14580	Tb927.11.4820 | transcript=Tb927.11.4820:mRNA | gene=Tb927.11.4820 | organism=Trypanosoma_brucei_brucei_TREU927 | gene_product=60S ribosomal protein L17, putative | transcript_product=60S ribosomal protein L17, putative | location=Tb927_11_v5.1:138	19.105	160.24	147390000	39	2	4	5	2	6	4	5	2	6	4	5	2	6	28.3	40.4	13.9	44.6	166	14550000	17077000	4715700	18734000	0.272362	0.534119	1	-0.745903	0.596295	-0.248489	21.2096	21.4406	19.5841	21.5742
Tb927.11.8200	Tb927.11.8200	Tb927.11.8200 | transcript=Tb927.11.8200:mRNA | gene=Tb927.11.8200 | organism=Trypanosoma_brucei_brucei_TREU927 | gene_product=ribosomal protein S26, putative | transcript_product=ribosomal protein S26, putative | location=Tb927_11_v5.1:2305896-230	12.806	136.2	419910000	47	1	6	5	2	7	6	5	2	7	6	5	2	7	48.6	52.3	18.9	55	111	52360000	33507000	8095300	52455000	0.269888	0.53717	1	-1.02334	0.491977	-0.302234	23.642	22.998	20.9486	23.6446
Tb927.1.2400; Tb927.1.2380; Tb927.1.2360; Tb927.1.2340; Tb11.v5.0468.1	Tb927.1.2400; Tb927.1.2380; Tb927.1.2360; Tb927.1.2340; Tb11.v5.0468.1	Tb927.1.2400 | transcript=Tb927.1.2400:mRNA | gene=Tb927.1.2400 | organism=Trypanosoma_brucei_brucei_TREU927 | gene_product=alpha tubulin | transcript_product=alpha tubulin | location=Tb927_01_v5.1:583368-584723(+) | protein_length=451 | sequence_S	49.787	323.31	17659000000	285	5	8	14	10	5	8	14	10	5	8	14	10	5	24.4	43	33.9	14.6	451	65896000	145160000	119140000	17106000	0.269692	0.537413	0.974194	-1.11532	0.461587	-0.317621	21.5814	22.7207	22.4358	19.6357
Tb927.10.2240	Tb927.10.2240	Tb927.10.2240 | transcript=Tb927.10.2240:mRNA | gene=Tb927.10.2240 | organism=Trypanosoma_brucei_brucei_TREU927 | gene_product=RNA binding protein | transcript_product=RNA binding protein | location=Tb927_10_v5.1:578334-580100(+) | protein_length=5	66.352	230.84	303640000	45	1	3	3	1	3	3	3	1	3	3	3	1	3	7.3	8.8	3.1	7.3	588	27998000	20487000	3563400	32503000	0.261225	0.547992	0.966295	-1.1541	0.449346	-0.319653	19.9315	19.4808	16.9574	20.1467
Tb927.3.5050	Tb927.3.5050	Tb927.3.5050 | transcript=Tb927.3.5050:mRNA | gene=Tb927.3.5050 | organism=Trypanosoma_brucei_brucei_TREU927 | gene_product=60S ribosomal protein L4 | transcript_product=60S ribosomal protein L4 | location=Tb927_03_v5.1:1417717-1418841(+) | protein	41.856	158.2	563410000	80	1	7	6	7	8	7	6	7	8	7	6	7	8	28.9	19.8	26.2	28.9	374	40608000	40782000	36354000	80002000	0.260159	0.549339	1	0.406223	1.32521	0.158126	21.2753	21.2814	21.1156	22.2536
Tb927.9.10770	Tb927.9.10770	Tb927.9.10770 | transcript=Tb927.9.10770:mRNA | gene=Tb927.9.10770 | organism=Trypanosoma_brucei_brucei_TREU927 | gene_product=polyadenylate-binding protein 2 | transcript_product=polyadenylate-binding protein 2 | location=Tb927_09_v5.1:1700279-170	62.147	258.74	677280000	107	1	9	9	6	9	9	9	6	9	9	9	6	9	24	23.8	16.8	19.8	555	42969000	41430000	22397000	47019000	0.257385	0.552859	1	-0.378672	0.769145	-0.14934	20.4988	20.4462	19.5588	20.6288
Tb927.10.11390	Tb927.10.11390	Tb927.10.11390 | transcript=Tb927.10.11390:mRNA | gene=Tb927.10.11390 | organism=Trypanosoma_brucei_brucei_TREU927 | gene_product=60S ribosomal protein L6, putative | transcript_product=60S ribosomal protein L6, putative | location=Tb927_10_v5.1:27	21.185	76.806	219290000	54	1	7	4	3	8	7	4	3	8	7	4	3	8	35.9	23.4	20.8	27.1	192	34015000	26250000	7578500	37623000	0.255919	0.554729	1	-0.823421	0.565101	-0.259685	21.5602	21.1863	19.3941	21.7057
Tb927.9.11410; Tb927.9.11380	Tb927.9.11410; Tb927.9.11380	Tb927.9.11410 | transcript=Tb927.9.11410:mRNA | gene=Tb927.9.11410 | organism=Trypanosoma_brucei_brucei_TREU927 | gene_product=60S ribosomal protein L23, putative | transcript_product=60S ribosomal protein L23, putative | location=Tb927_09_v5.1:178	14.962	99.398	197700000	33	2	4	4	3	7	4	4	3	7	4	4	3	7	36	29.5	29.5	69.8	139	11720000	7603900	7178200	48712000	0.253164	0.558259	1	0.986094	1.98082	0.28866	20.4825	19.8583	19.7752	22.5378
Tb927.6.5040	Tb927.6.5040	Tb927.6.5040 | transcript=Tb927.6.5040:mRNA | gene=Tb927.6.5040 | organism=Trypanosoma_brucei_brucei_TREU927 | gene_product=ribosomal protein L15, putative | transcript_product=ribosomal protein L15, putative | location=Tb927_06_v5.1:1380714-138132	24.433	54.914	234270000	42	1	4	5	3	5	4	5	3	5	0	1	0	0	16.7	22.1	13.2	22.5	204	33779000	34732000	12858000	41130000	0.248685	0.564046	1	-0.574754	0.671401	-0.20245	22.2022	22.2424	20.8088	22.4863
Tb927.9.3290	Tb927.9.3290	Tb927.9.3290 | transcript=Tb927.9.3290:mRNA | gene=Tb927.9.3290 | organism=Trypanosoma_brucei_brucei_TREU927 | gene_product=4F5 protein family, putative | transcript_product=4F5 protein family, putative | location=Tb927_09_v5.1:696307-696477(+) | p	6.5213	6.1661	18685000	9	1	3	1	2	3	3	1	2	3	3	1	2	3	26.8	21.4	25	26.8	56	7013000	843690	3772400	7055500	0.247043	0.566183	1	1.08469	2.12092	0.301891	21.7416	18.6864	20.8471	21.7503
Tb927.1.4490	Tb927.1.4490	Tb927.1.4490 | transcript=Tb927.1.4490:mRNA | gene=Tb927.1.4490 | organism=Trypanosoma_brucei_brucei_TREU927 | gene_product=acetyltransferase, putative | transcript_product=acetyltransferase, putative | location=Tb927_01_v5.1:928858-929376(+) | pro	19.682	24.754	18720000	6	1	2	1	1	2	2	1	1	2	2	1	1	2	16.9	12.8	12.2	16.9	172	5562700	2162700	3530900	7463900	0.235036	0.582054	1	0.565676	1.48008	0.197137	19.2374	17.8745	18.5817	19.6616
Tb927.11.14100	Tb927.11.14100	Tb927.11.14100 | transcript=Tb927.11.14100:mRNA | gene=Tb927.11.14100 | organism=Trypanosoma_brucei_brucei_TREU927 | gene_product=Double RNA-binding domain containing protein 4 | transcript_product=Double RNA-binding domain containing protein 4 | l	54.707	118.14	109000000	34	1	3	4	3	5	3	4	3	5	3	4	3	5	8.5	12.3	8.5	20.2	505	12021000	18732000	7785400	16619000	0.227165	0.5927	1	-0.399679	0.758027	-0.151755	19.1268	19.7667	18.5	19.594
Tb927.10.4120.2; Tb927.10.4110; Tb927.10.4120.1	Tb927.10.4120.2; Tb927.10.4110; Tb927.10.4120.1	Tb927.10.4120.2 | transcript=Tb927.10.4120.2:mRNA | gene=Tb927.10.4120 | organism=Trypanosoma_brucei_brucei_TREU927 | gene_product=60S ribosomal protein L30 | transcript_product=60S ribosomal protein L30 | location=Tb927_10_v5.1:1082807-1083124(-)	11.512	85.012	163620000	39	3	8	5	4	9	8	5	4	9	8	5	4	9	80	53.3	41.9	88.6	105	52117000	29266000	14868000	46469000	0.222929	0.598509	1	-0.571258	0.67303	-0.195539	23.0503	22.2177	21.2407	22.8848
Tb927.11.6200; Tb927.11.6180	Tb927.11.6200; Tb927.11.6180	Tb927.11.6200 | transcript=Tb927.11.6200:mRNA | gene=Tb927.11.6200 | organism=Trypanosoma_brucei_brucei_TREU927 | gene_product=60S ribosomal protein L28, putative | transcript_product=60S ribosomal protein L28, putative | location=Tb927_11_v5.1:174	16.861	323.31	294450000	45	2	4	2	2	4	4	2	2	4	4	2	2	4	32.9	15.8	15.8	35.6	146	10672000	13132000	9415700	30518000	0.215585	0.608717	1	0.517934	1.4319	0.18101	20.7624	21.0616	20.5817	22.2782
Tb927.10.2890; Tb11.v5.0650.1	Tb927.10.2890; Tb11.v5.0650.1	Tb927.10.2890 | transcript=Tb927.10.2890:mRNA | gene=Tb927.10.2890 | organism=Trypanosoma_brucei_brucei_TREU927 | gene_product=enolase | transcript_product=enolase | location=Tb927_10_v5.1:746309-747598(+) | protein_length=429 | sequence_SO=chromos	46.592	204.06	291280000	66	2	15	12	6	14	15	12	6	14	15	12	6	14	36.8	28.2	14.2	34.3	429	87191000	58610000	31252000	85739000	0.213212	0.612052	1	-0.465706	0.724117	-0.167378	21.7338	21.1608	20.2536	21.7096
Tb927.1.2390; Tb927.1.2370; Tb927.1.2350; Tb927.1.2330; Tb11.v5.0469.1; Tb927.1.2410	Tb927.1.2390; Tb927.1.2370; Tb927.1.2350; Tb927.1.2330; Tb11.v5.0469.1; Tb927.1.2410	Tb927.1.2390 | transcript=Tb927.1.2390:mRNA | gene=Tb927.1.2390 | organism=Trypanosoma_brucei_brucei_TREU927 | gene_product=beta tubulin | transcript_product=beta tubulin | location=Tb927_01_v5.1:581408-582736(+) | protein_length=442 | sequence_SO=	49.704	323.31	19651000000	293	6	14	16	17	12	14	16	17	12	14	16	17	12	36	39.1	41	39.4	442	152060000	249310000	265650000	58843000	0.198828	0.632662	1	-0.639118	0.642105	-0.203265	22.8582	23.5715	23.663	21.4885
Tb927.7.5020; Tb927.7.5000; Tb11.v5.0182.1; Tb11.v5.0181.1	Tb927.7.5020; Tb927.7.5000; Tb11.v5.0182.1; Tb11.v5.0181.1	Tb927.7.5020 | transcript=Tb927.7.5020:mRNA | gene=Tb927.7.5020 | organism=Trypanosoma_brucei_brucei_TREU927 | gene_product=60S ribosomal protein L19, putative | transcript_product=60S ribosomal protein L19, putative | location=Tb927_07_v5.1:132559	29.408	79.12	248550000	50	4	7	5	3	7	7	5	3	7	7	5	3	7	18.1	18.8	11.2	23.8	260	23123000	20976000	7004800	30990000	0.191399	0.643578	1	-0.579941	0.668991	-0.1886	21.4628	21.3222	19.7399	21.8853
Tb927.8.1500	Tb927.8.1500	Tb927.8.1500 | transcript=Tb927.8.1500:mRNA | gene=Tb927.8.1500 | organism=Trypanosoma_brucei_brucei_TREU927 | gene_product=hypothetical protein, conserved | transcript_product=hypothetical protein, conserved | location=Tb927_08_v5.1:487358-489163(	63.206	33.363	34002000	14	1	2	2	1	2	2	2	1	2	2	2	1	2	5.2	5.2	2.5	5.2	601	4814300	5456900	1608000	7275300	0.189297	0.646701	1	-0.583557	0.667316	-0.188693	17.7395	17.9202	16.1574	18.3352
Tb927.6.3290	Tb927.6.3290	Tb927.6.3290 | transcript=Tb927.6.3290:mRNA | gene=Tb927.6.3290 | organism=Trypanosoma_brucei_brucei_TREU927 | gene_product=intraflagellar transport protein 20 | transcript_product=intraflagellar transport protein 20 | location=Tb927_06_v5.1:972730	15.419	3.7249	5303200	4	1	0	2	1	1	0	2	1	1	0	2	1	1	0	9.2	9.2	9.2	130	0	2574300	1268400	1460600	0.184473	0.653923	1	1.00564	2.00783	0.256033	14.6382	18.4884	17.4671	17.6707
Tb927.10.14710; Tb927.10.14600	Tb927.10.14710; Tb927.10.14600	Tb927.10.14710 | transcript=Tb927.10.14710:mRNA | gene=Tb927.10.14710 | organism=Trypanosoma_brucei_brucei_TREU927 | gene_product=40S ribosomal protein S2, putative | transcript_product=40S ribosomal protein S2, putative | location=Tb927_10_v5.1:35	28.642	267.35	437200000	87	2	10	8	3	11	10	8	3	11	10	8	3	11	27.4	31.6	13.5	35	266	43325000	31356000	7977900	60119000	0.179584	0.661326	1	-0.75104	0.594175	-0.216101	21.1988	20.7323	18.7577	21.6714
Tb927.10.3940; Tb11.v5.0501.1; Tb927.10.3930	Tb927.10.3940; Tb11.v5.0501.1; Tb927.10.3930	Tb927.10.3940 | transcript=Tb927.10.3940:mRNA | gene=Tb927.10.3940 | organism=Trypanosoma_brucei_brucei_TREU927 | gene_product=40S ribosomal protein S3A, putative | transcript_product=40S ribosomal protein S3A, putative | location=Tb927_10_v5.1:104	29.422	211.79	391800000	68	3	8	4	4	7	8	4	4	7	8	4	4	7	33.6	20.7	15.2	28.9	256	44471000	33140000	17611000	48805000	0.179287	0.66178	1	-0.388952	0.763684	-0.140657	21.4995	21.0752	20.1631	21.6336
Tb927.11.9720	Tb927.11.9720	Tb927.11.9720 | transcript=Tb927.11.9720:mRNA | gene=Tb927.11.9720 | organism=Trypanosoma_brucei_brucei_TREU927 | gene_product=40S ribosomal protein S27, putative | transcript_product=40S ribosomal protein S27, putative | location=Tb927_11_v5.1:263	9.6302	57.458	196020000	26	1	3	4	3	5	3	4	3	5	1	1	1	1	43	58.1	43	61.6	86	20436000	23051000	15603000	60022000	0.179188	0.661929	1	0.495663	1.40997	0.166571	21.9627	22.1364	21.5734	23.517
Tb927.2.6090; Tb927.11.3230	Tb927.2.6090; Tb927.11.3230	Tb927.2.6090 | transcript=Tb927.2.6090:mRNA | gene=Tb927.2.6090 | organism=Trypanosoma_brucei_brucei_TREU927 | gene_product=60S ribosomal protein L44 | transcript_product=60S ribosomal protein L44 | location=Tb927_02_v5.1:1099561-1099881(+) | prote	12.454	50.355	70875000	16	2	2	1	1	2	2	1	1	2	2	1	1	2	22.6	8.5	8.5	16	106	7459400	3384900	2802300	5424200	0.173342	0.6709	1	-0.366121	0.775866	-0.133483	20.5087	19.3688	19.0963	20.049
Tb927.10.3990	Tb927.10.3990	Tb927.10.3990 | transcript=Tb927.10.3990:mRNA | gene=Tb927.10.3990 | organism=Trypanosoma_brucei_brucei_TREU927 | gene_product=DHH1 | transcript_product=DHH1 | location=Tb927_10_v5.1:1056282-1057502(-) | protein_length=406 | sequence_SO=chromosome	46.468	38.837	19520000	7	1	1	1	1	3	1	1	1	3	1	1	1	3	6.2	6.2	6.2	11.1	406	1398300	3882400	1515800	9958300	0.16744	0.68008	1	0.737714	1.66753	0.208109	15.7148	17.188	15.8312	18.547
Tb927.7.1750; Tb927.7.1740; Tb927.7.1730	Tb927.7.1750; Tb927.7.1740; Tb927.7.1730	Tb927.7.1750 | transcript=Tb927.7.1750:mRNA | gene=Tb927.7.1750 | organism=Trypanosoma_brucei_brucei_TREU927 | gene_product=60S ribosomal protein L7, putative | transcript_product=60S ribosomal protein L7, putative | location=Tb927_07_v5.1:431071-4	27.713	58.301	208660000	39	3	6	4	2	7	6	4	2	7	6	4	2	7	33.9	24.4	12	33.5	242	37191000	20205000	4844900	50677000	0.161168	0.689972	1	-0.806882	0.571616	-0.215189	21.5635	20.6832	18.6231	22.0098
Tb927.5.1110; Tb927.11.16280	Tb927.5.1110; Tb927.11.16280	Tb927.5.1110 | transcript=Tb927.5.1110:mRNA | gene=Tb927.5.1110 | organism=Trypanosoma_brucei_brucei_TREU927 | gene_product=60S ribosomal protein L8, putative | transcript_product=60S ribosomal protein L8, putative | location=Tb927_05_v5.1:419367-4	28.314	60.757	439840000	70	2	7	6	5	10	7	6	5	10	7	6	5	10	26.5	25.4	23.5	36.5	260	60259000	22831000	27771000	102430000	0.155623	0.698839	1	0.524021	1.43796	0.165137	22.1442	20.744	21.0267	22.9096
Tb927.10.6070	Tb927.10.6070	Tb927.10.6070 | transcript=Tb927.10.6070:mRNA | gene=Tb927.10.6070 | organism=Trypanosoma_brucei_brucei_TREU927 | gene_product=universal minicircle sequence binding protein 1 | transcript_product=universal minicircle sequence binding protein 1 | lo	14.566	117.53	2853500000	80	1	8	8	8	9	7	7	7	8	7	7	7	8	67.9	67.9	62.9	72.1	140	317490000	163000000	193360000	420810000	0.15378	0.70181	1	0.326438	1.25391	0.119187	24.9202	23.9584	24.2048	25.3267
Tb927.10.560	Tb927.10.560	Tb927.10.560 | transcript=Tb927.10.560:mRNA | gene=Tb927.10.560 | organism=Trypanosoma_brucei_brucei_TREU927 | gene_product=40S ribosomal proteins S11, putative | transcript_product=40S ribosomal proteins S11, putative | location=Tb927_10_v5.1:1471	20.087	173.94	438440000	67	1	7	10	4	10	7	10	4	10	2	3	1	2	50	54	32.2	60.9	174	42231000	55717000	17124000	72052000	0.15353	0.702215	1	-0.46569	0.724125	-0.152403	22.1619	22.5617	20.8595	22.9326
Tb927.10.6370; Tb927.10.220	Tb927.10.6370; Tb927.10.220	Tb927.10.6370 | transcript=Tb927.10.6370:mRNA | gene=Tb927.10.6370 | organism=Trypanosoma_brucei_brucei_TREU927 | gene_product=60S ribosomal proteins L37, putative | transcript_product=60S ribosomal proteins L37, putative | location=Tb927_10_v5.1:1	10.458	18.134	167280000	18	2	3	1	2	2	3	1	2	2	3	1	2	2	35.5	7.5	26.9	26.9	93	35311000	4381100	14992000	26811000	0.153389	0.702443	1	0.688773	1.61191	0.193332	23.4886	20.4779	22.2527	23.0913
Tb927.11.9710; Tb927.10.13500	Tb927.11.9710; Tb927.10.13500	Tb927.11.9710 | transcript=Tb927.11.9710:mRNA | gene=Tb927.11.9710 | organism=Trypanosoma_brucei_brucei_TREU927 | gene_product=60S ribosomal protein L10a, putative | transcript_product=60S ribosomal protein L10a, putative | location=Tb927_11_v5.1:2	24.597	45.514	79527000	29	2	4	4	2	5	4	4	2	5	4	4	2	5	21	21.5	7.9	16.4	214	10459000	12603000	3499700	18151000	0.153347	0.702511	1	-0.526579	0.694199	-0.164815	19.9963	20.2653	18.4169	20.7916
Tb927.11.6300	Tb927.11.6300	Tb927.11.6300 | transcript=Tb927.11.6300:mRNA | gene=Tb927.11.6300 | organism=Trypanosoma_brucei_brucei_TREU927 | gene_product=40S ribosomal protein S5, putative | transcript_product=40S ribosomal protein S5, putative | location=Tb927_11_v5.1:17723	21.386	176.05	132230000	30	1	2	3	2	2	2	3	2	2	2	3	2	2	13.7	18.4	11.1	12.6	190	4346300	10765000	6036500	5170800	0.153059	0.702978	1	-0.291967	0.816787	-0.10961	18.8814	20.1899	19.3554	19.132
Tb927.11.15900; Tb927.11.15880	Tb927.11.15900; Tb927.11.15880	Tb927.11.15900 | transcript=Tb927.11.15900:mRNA | gene=Tb927.11.15900 | organism=Trypanosoma_brucei_brucei_TREU927 | gene_product=60S ribosomal protein L27, putative | transcript_product=60S ribosomal protein L27, putative | location=Tb927_11_v5.1:	15.581	73.451	107950000	18	2	2	2	1	3	2	2	1	3	2	2	1	3	13.5	13.5	7.5	19.5	133	11108000	11443000	3633000	17770000	0.148055	0.711124	1	-0.488729	0.712653	-0.155384	20.5978	20.6407	18.9854	21.2756
Tb927.11.11725; Tb927.11.11475	Tb927.11.11725; Tb927.11.11475	Tb927.11.11725 | transcript=Tb927.11.11725:mRNA | gene=Tb927.11.11725 | organism=Trypanosoma_brucei_brucei_TREU927 | gene_product=ribosomal protein S14p/S29e | transcript_product=ribosomal protein S14p/S29e | location=Tb927_11_v5.1:3145263-3145436(	6.7299	215.47	324850000	34	2	5	5	5	5	5	5	5	5	5	5	5	5	66.7	66.7	66.7	66.7	57	72358000	48853000	44553000	128320000	0.147805	0.711534	1	0.346817	1.27175	0.123247	24.1086	23.5419	23.409	24.9352
Tb927.4.1100; Tb927.11.680; Tb11.0880	Tb927.4.1100; Tb927.11.680; Tb11.0880	Tb927.4.1100 | transcript=Tb927.4.1100:mRNA | gene=Tb927.4.1100 | organism=Trypanosoma_brucei_brucei_TREU927 | gene_product=ribosomal protein L21E (60S), putative | transcript_product=ribosomal protein L21E (60S), putative | location=Tb927_04_v5.1:	18.015	118.6	243480000	36	3	5	4	2	5	5	4	2	5	5	4	2	5	30.8	23.3	11.9	25.8	159	33240000	28375000	14519000	42257000	0.13729	0.72897	1	-0.310204	0.806528	-0.111623	21.9864	21.7581	20.7915	22.3327
Tb927.9.8880; Tb927.9.8850	Tb927.9.8880; Tb927.9.8850	Tb927.9.8880 | transcript=Tb927.9.8880:mRNA | gene=Tb927.9.8880 | organism=Trypanosoma_brucei_brucei_TREU927 | gene_product=actin B | transcript_product=actin B | location=Tb927_09_v5.1:1427029-1428159(-) | protein_length=376 | sequence_SO=chromoso	41.895	24.538	42380000	19	2	2	2	1	5	2	2	1	5	2	2	1	5	12.5	7.4	2.7	18.4	376	3046600	5525000	2747800	10764000	0.129898	0.741484	1	0.406638	1.32559	0.132264	17.1464	18.0053	16.9976	18.9674
Tb927.9.13920; Tb927.9.13860; Tb927.9.13820; Tb927.9.13795; Tb927.9.13785	Tb927.9.13920; Tb927.9.13860; Tb927.9.13820; Tb927.9.13795; Tb927.9.13785	Tb927.9.13920 | transcript=Tb927.9.13920:mRNA | gene=Tb927.9.13920 | organism=Trypanosoma_brucei_brucei_TREU927 | gene_product=kinetoplastid membrane protein 11-1 | transcript_product=kinetoplastid membrane protein 11-1 | location=Tb927_09_v5.1:218	11.076	323.31	1801200000	75	5	1	6	3	1	1	6	3	1	1	6	3	1	17.4	53.3	30.4	17.4	92	4985800	25292000	16501000	3249500	0.127585	0.745444	1	-0.616884	0.652078	-0.16868	19.442	21.7848	21.1687	18.8244
Tb927.11.14130; Tb927.10.3840	Tb927.11.14130; Tb927.10.3840	Tb927.11.14130 | transcript=Tb927.11.14130:mRNA | gene=Tb927.11.14130 | organism=Trypanosoma_brucei_brucei_TREU927 | gene_product=ribosomal protein L18, putative | transcript_product=ribosomal protein L18, putative | location=Tb927_11_v5.1:3745050-	20.904	148.76	246300000	35	2	5	4	2	5	5	4	2	5	5	4	2	5	33.5	29.1	22.3	25.1	179	30768000	34503000	11757000	52888000	0.121057	0.756734	1	-0.385846	0.76533	-0.124956	21.553	21.7183	20.1651	22.3345
Tb927.8.1510	Tb927.8.1510	Tb927.8.1510 | transcript=Tb927.8.1510:mRNA | gene=Tb927.8.1510 | organism=Trypanosoma_brucei_brucei_TREU927 | gene_product=ATP-dependent RNA helicase DBP2B, putative | transcript_product=ATP-dependent RNA helicase DBP2B, putative | location=Tb927_	62.439	72.014	248310000	59	1	7	4	3	6	7	4	3	6	7	4	3	6	16	10	10	17.4	569	27562000	20716000	15417000	29287000	0.113495	0.770026	1	-0.169309	0.889269	-0.0675445	19.6287	19.2168	18.7906	19.7163
Tb927.4.2180	Tb927.4.2180	Tb927.4.2180 | transcript=Tb927.4.2180:mRNA | gene=Tb927.4.2180 | organism=Trypanosoma_brucei_brucei_TREU927 | gene_product=60S ribosomal protein L35a, putative | transcript_product=60S ribosomal protein L35a, putative | location=Tb927_04_v5.1:5606	17.021	93.228	358480000	73	1	8	6	5	9	8	6	5	9	8	6	5	9	56.4	43	39.6	64.4	149	53415000	38307000	18919000	69635000	0.110992	0.774475	1	-0.317581	0.802414	-0.106927	22.6707	22.1911	21.1733	23.0533
Tb927.3.3320; Tb927.3.3310	Tb927.3.3320; Tb927.3.3310	Tb927.3.3320 | transcript=Tb927.3.3320:mRNA | gene=Tb927.3.3320 | organism=Trypanosoma_brucei_brucei_TREU927 | gene_product=60S ribosomal protein L13, putative | transcript_product=60S ribosomal protein L13, putative | location=Tb927_03_v5.1:851801	25.427	201.97	528850000	78	2	6	6	6	9	6	6	6	9	6	6	6	9	28.4	23.9	22.9	39	218	50185000	38926000	15554000	76581000	0.103364	0.788199	1	-0.35686	0.780862	-0.112775	22.2588	21.8923	20.5689	22.8686
Tb927.6.720; Tb927.11.11230	Tb927.6.720; Tb927.11.11230	Tb927.6.720 | transcript=Tb927.6.720:mRNA | gene=Tb927.6.720 | organism=Trypanosoma_brucei_brucei_TREU927 | gene_product=40S ribosomal protein L14, putative | transcript_product=40S ribosomal protein L14, putative | location=Tb927_06_v5.1:298195-29	21.443	45.348	137620000	36	2	5	3	2	7	5	3	2	7	5	3	2	7	29.1	14.3	13.8	31.2	189	19722000	12618000	3723100	33954000	0.101129	0.792265	1	-0.488555	0.712739	-0.13471	21.4259	20.7816	19.0207	22.2097
Tb927.11.11370; Tb927.11.11360	Tb927.11.11370; Tb927.11.11360	Tb927.11.11370 | transcript=Tb927.11.11370:mRNA | gene=Tb927.11.11370 | organism=Trypanosoma_brucei_brucei_TREU927 | gene_product=receptor for activated C kinase 1 | transcript_product=receptor for activated C kinase 1 | location=Tb927_11_v5.1:3037	34.69	62.532	45109000	13	2	1	2	1	2	1	2	1	2	1	2	1	2	3.8	10.7	5.3	9.7	318	602390	9620800	987310	2593800	0.0931821	0.806897	1	-0.589125	0.664746	-0.143108	14.9524	18.9498	15.6652	17.0588
Tb10.v4.0052; Tb10.v4.0053; Tb927.10.10360	Tb10.v4.0052; Tb10.v4.0053; Tb927.10.10360	Tb10.v4.0052 | transcript=Tb10.v4.0052:mRNA | gene=Tb10.v4.0052 | organism=Trypanosoma_brucei_brucei_TREU927 | gene_product=microtubule-associated protein 2 | transcript_product=microtubule-associated protein 2 | location=Tp_ends-39g01.p1k:50-14692	561.21	323.31	8035300000	113	3	5	8	5	5	5	8	5	5	1	2	0	1	31.8	81.1	47.9	68.4	4880	60088000	214320000	129550000	67101000	0.0917891	0.809489	1	-0.283455	0.821621	-0.0934628	17.2821	19.1168	18.3905	17.4414
Tb927.10.7680	Tb927.10.7680	Tb927.10.7680 | transcript=Tb927.10.7680:mRNA | gene=Tb927.10.7680 | organism=Trypanosoma_brucei_brucei_TREU927 | gene_product=GTPase activating protein, putative | transcript_product=GTPase activating protein, putative | location=Tb927_10_v5.1:193	60.165	3.1029	2172100	3	1	0	0	1	1	0	0	1	1	0	0	1	1	0	0	2.8	2.8	530	0	0	418980	1088300	0.0795432	0.832639	1	-0.236358	0.848886	-0.0791941	15.7201	14.3128	14.0915	15.4687
Tb927.9.8420; Tb927.9.8070	Tb927.9.8420; Tb927.9.8070	Tb927.9.8420 | transcript=Tb927.9.8420:mRNA | gene=Tb927.9.8420 | organism=Trypanosoma_brucei_brucei_TREU927 | gene_product=QM-like protein | transcript_product=QM-like protein | location=Tb927_09_v5.1:1373453-1374094(-) | protein_length=213 | sequ	24.736	264.51	325320000	51	2	6	5	6	5	6	5	6	5	6	5	6	5	33.3	24.4	33.3	29.1	213	40225000	23373000	19757000	39496000	0.0696008	0.851921	1	-0.134429	0.91103	-0.0510197	21.8022	21.0189	20.7764	21.7758
Tb927.3.4760	Tb927.3.4760	Tb927.3.4760 | transcript=Tb927.3.4760:mRNA | gene=Tb927.3.4760 | organism=Trypanosoma_brucei_brucei_TREU927 | gene_product=dynamin-1-like protein | transcript_product=dynamin-1-like protein | location=Tb927_03_v5.1:1344510-1346492(-) | protein_len	73.148	2.426	17434000	6	1	13	12	2	11	1	1	0	0	1	1	0	0	23.5	19.8	4.1	21.8	660	2807400	2245700	0	0	0.0690027	0.853095	1	0.305595	1.23593	0.0884506	15.9946	15.6725	14.6931	17.5851
Tb927.10.5340; Tb927.10.5330; Tb11.v5.1060.1; Tb11.v5.0243.1	Tb927.10.5340; Tb927.10.5330; Tb11.v5.1060.1; Tb11.v5.0243.1	Tb927.10.5340 | transcript=Tb927.10.5340:mRNA | gene=Tb927.10.5340 | organism=Trypanosoma_brucei_brucei_TREU927 | gene_product=40S ribosomal protein S18, putative | transcript_product=40S ribosomal protein S18, putative | location=Tb927_10_v5.1:133	17.51	323.31	423600000	41	4	4	3	3	3	4	3	3	3	4	3	3	3	30.1	25.5	25.5	25.5	153	41878000	29826000	20633000	49956000	0.0664951	0.858035	1	-0.138572	0.908418	-0.0516439	22.1498	21.6601	21.1286	22.4042
Tb927.4.1800; Tb927.4.1790	Tb927.4.1800; Tb927.4.1790	Tb927.4.1800 | transcript=Tb927.4.1800:mRNA | gene=Tb927.4.1800 | organism=Trypanosoma_brucei_brucei_TREU927 | gene_product=Mitochondrial ribosomal protein L3 | transcript_product=Mitochondrial ribosomal protein L3 | location=Tb927_04_v5.1:450119-4	48.691	154.63	572080000	99	2	14	11	5	17	14	11	5	17	14	11	5	17	46.4	26.3	13.1	51.7	429	89631000	53521000	23493000	141200000	0.0646998	0.861589	1	-0.266047	0.831595	-0.07951	21.8939	21.15	19.9623	22.5496
Tb927.11.4360	Tb927.11.4360	Tb927.11.4360 | transcript=Tb927.11.4360:mRNA | gene=Tb927.11.4360 | organism=Trypanosoma_brucei_brucei_TREU927 | gene_product=Protein of unknown function (DUF1014), putative | transcript_product=Protein of unknown function (DUF1014), putative | lo	29.673	76.724	111580000	24	1	4	5	2	6	4	5	2	6	4	5	2	6	23.3	27.2	14	35.8	257	13254000	27566000	8960000	51176000	0.0384256	0.915323	1	0.163861	1.12028	0.0487185	20.338	21.3945	19.7731	22.287
Tb927.11.4900	Tb927.11.4900	Tb927.11.4900 | transcript=Tb927.11.4900:mRNA | gene=Tb927.11.4900 | organism=Trypanosoma_brucei_brucei_TREU927 | gene_product=WD40/YVTN repeat-like-containing protein | transcript_product=WD40/YVTN repeat-like-containing protein | location=Tb927_1	61.857	18.988	40524000	14	1	1	2	1	2	1	2	1	2	1	2	1	2	1.6	3.9	2.3	3.4	560	1943000	3213900	1381900	3944600	0.0373453	0.917603	1	-0.0981221	0.934248	-0.0345599	15.9357	16.6618	15.444	16.9572
Tb927.8.1340; Tb927.8.1330	Tb927.8.1340; Tb927.8.1330	Tb927.8.1340 | transcript=Tb927.8.1340:mRNA | gene=Tb927.8.1340 | organism=Trypanosoma_brucei_brucei_TREU927 | gene_product=60S ribosomal protein L7a, putative | transcript_product=60S ribosomal protein L7a, putative | location=Tb927_08_v5.1:429328	30.879	87.455	368140000	60	2	8	6	5	12	8	6	5	12	8	6	5	12	37.7	33.7	24.3	50.7	276	55990000	25270000	19608000	86727000	0.0347471	0.923109	1	0.132665	1.09632	0.0412463	22.4167	21.269	20.903	23.048
Tb927.5.1610; Tb927.4.3550	Tb927.5.1610; Tb927.4.3550	Tb927.5.1610 | transcript=Tb927.5.1610:mRNA | gene=Tb927.5.1610 | organism=Trypanosoma_brucei_brucei_TREU927 | gene_product=60S ribosomal protein L13a, putative | transcript_product=60S ribosomal protein L13a, putative | location=Tb927_05_v5.1:5681	25.711	42.744	217960000	42	2	8	5	4	7	8	5	4	7	8	5	4	7	32.4	24.3	23	33.8	222	30980000	26042000	12384000	55676000	0.0330059	0.926817	1	-0.113265	0.924493	-0.0366381	21.8848	21.6343	20.5621	22.7306
Tb927.10.14700	Tb927.10.14700	Tb927.10.14700 | transcript=Tb927.10.14700:mRNA | gene=Tb927.10.14700 | organism=Trypanosoma_brucei_brucei_TREU927 | gene_product=hypothetical protein, conserved | transcript_product=hypothetical protein, conserved | location=Tb927_10_v5.1:3590736-	37.7	21.505	270790000	29	1	4	4	4	4	4	4	4	4	4	4	4	4	13.7	13.7	13.7	13.7	342	28642000	28200000	20775000	36869000	0.0293202	0.934716	1	-0.0382996	0.973802	-0.0158659	20.7716	20.7492	20.3083	21.1359
Tb927.6.4980; Tb927.11.7705; Tb11.0390; Tb11.0290	Tb927.6.4980; Tb927.11.7705; Tb11.0390; Tb11.0290	Tb927.6.4980 | transcript=Tb927.6.4980:mRNA | gene=Tb927.6.4980 | organism=Trypanosoma_brucei_brucei_TREU927 | gene_product=40S ribosomal protein S14 | transcript_product=40S ribosomal protein S14 | location=Tb927_06_v5.1:1370239-1370673(+) | prote	15.513	157.22	391080000	64	4	8	5	4	8	8	5	4	8	8	5	4	8	50.7	41	33.3	50.7	144	51948000	34035000	26496000	73849000	0.0289591	0.935494	1	0.0731201	1.05199	0.0261156	22.8232	22.2132	21.8519	23.3307
Tb927.3.1370; Tb927.10.2840	Tb927.3.1370; Tb927.10.2840	Tb927.3.1370 | transcript=Tb927.3.1370:mRNA | gene=Tb927.3.1370 | organism=Trypanosoma_brucei_brucei_TREU927 | gene_product=40S ribosomal protein S25, putative | transcript_product=40S ribosomal protein S25, putative | location=Tb927_03_v5.1:343637	12.56	70.758	330780000	39	2	4	3	3	6	4	3	3	6	4	3	3	6	36.3	25.7	34.5	35.4	113	74109000	11849000	18678000	39358000	0.028445	0.936602	1	-0.128249	0.914941	-0.0374172	23.8212	21.1764	21.8329	22.9082
Tb927.9.6070; Tb927.10.11540	Tb927.9.6070; Tb927.10.11540	Tb927.9.6070 | transcript=Tb927.9.6070:mRNA | gene=Tb927.9.6070 | organism=Trypanosoma_brucei_brucei_TREU927 | gene_product=40S ribosomal protein S3, putative | transcript_product=40S ribosomal protein S3, putative | location=Tb927_09_v5.1:1008372-	24.216	140.83	475750000	58	2	6	7	4	8	6	7	4	8	6	7	4	8	37.4	42.5	26.6	42.5	214	57744000	46743000	31395000	79472000	0.0260633	0.941752	1	-0.056694	0.961465	-0.0210988	22.1982	21.8933	21.3191	22.659
Tb927.8.1110; Tb927.10.5610	Tb927.8.1110; Tb927.10.5610	Tb927.8.1110 | transcript=Tb927.8.1110:mRNA | gene=Tb927.8.1110 | organism=Trypanosoma_brucei_brucei_TREU927 | gene_product=40S ribosomal protein S9, putative | transcript_product=40S ribosomal protein S9, putative | location=Tb927_08_v5.1:355680-3	22.051	51.674	198170000	49	2	2	3	2	7	2	3	2	7	2	3	2	7	17.4	23.2	17.4	32.1	190	8961800	12549000	4740000	21016000	0.0250686	0.943912	1	-0.0874977	0.941154	-0.0282128	19.6359	20.1216	18.717	20.8655
Tb927.2.4710	Tb927.2.4710	Tb927.2.4710 | transcript=Tb927.2.4710:mRNA | gene=Tb927.2.4710 | organism=Trypanosoma_brucei_brucei_TREU927 | gene_product=RNA-binding protein, putative | transcript_product=RNA-binding protein, putative | location=Tb927_02_v5.1:834116-835441(-) |	49.983	33.373	104890000	31	1	4	2	2	6	4	2	2	6	4	2	2	6	11.3	6.6	4.3	14.7	441	10560000	7931100	3371500	29292000	0.0238219	0.946625	1	0.118916	1.08592	0.0332803	18.9398	18.5268	17.2927	20.4117
Tb927.9.14370; Tb927.8.6180	Tb927.9.14370; Tb927.8.6180	Tb927.9.14370 | transcript=Tb927.9.14370:mRNA | gene=Tb927.9.14370 | organism=Trypanosoma_brucei_brucei_TREU927 | gene_product=60S ribosomal protein L26, putative | transcript_product=60S ribosomal protein L26, putative | location=Tb927_09_v5.1:224	16.454	7.7865	50288000	10	2	1	1	1	1	1	1	1	1	1	1	1	1	6.3	6.3	6.3	6.3	143	4663100	5151100	3245400	7910700	0.0233822	0.947584	1	0.0480042	1.03383	0.0181373	20.1529	20.2965	19.63	20.9154
Tb927.8.595	Tb927.8.595	Tb927.8.595 | transcript=Tb927.8.595:mRNA | gene=Tb927.8.595 | organism=Trypanosoma_brucei_brucei_TREU927 | gene_product=hypothetical protein | transcript_product=hypothetical protein | location=Tb927_08_v5.1:169489-169734(-) | protein_length=81 |	8.8512	149.4	179080000	19	1	4	4	2	5	4	4	2	5	4	4	2	5	30.9	38.3	17.3	48.1	81	49761000	34044000	20763000	74510000	0.0213988	0.951922	1	-0.0654516	0.955646	-0.0221008	23.9835	23.4359	22.7226	24.566
Tb927.11.4300; Tb927.10.9880	Tb927.11.4300; Tb927.10.9880	Tb927.11.4300 | transcript=Tb927.11.4300:mRNA | gene=Tb927.11.4300 | organism=Trypanosoma_brucei_brucei_TREU927 | gene_product=60S ribosomal protein L18, putative | transcript_product=60S ribosomal protein L18, putative | location=Tb927_11_v5.1:125	21.874	143.26	379310000	66	2	9	6	2	11	9	6	2	11	9	6	2	11	54.9	42	17.1	56.5	193	63326000	22384000	14828000	84271000	0.0195292	0.956029	1	-0.0909224	0.938922	-0.0262727	23.1089	21.6086	21.0145	23.5212
Tb927.2.4200	Tb927.2.4200	Tb927.2.4200 | transcript=Tb927.2.4200:mRNA | gene=Tb927.2.4200 | organism=Trypanosoma_brucei_brucei_TREU927 | gene_product=CMGC/CLK family protein kinase, putative | transcript_product=CMGC/CLK family protein kinase, putative | location=Tb927_02_v	113.33	1.6332	586630000	8	1	1	1	1	1	1	1	1	1	1	1	1	1	1	1	1	1	1037	77260000	85952000	76762000	87340000	0.0179823	0.95944	1	0.00693417	1.00482	0.00326962	20.3703	20.5241	20.361	20.5473
Tb927.9.11490; Tb927.9.11470	Tb927.9.11490; Tb927.9.11470	Tb927.9.11490 | transcript=Tb927.9.11490:mRNA | gene=Tb927.9.11490 | organism=Trypanosoma_brucei_brucei_TREU927 | gene_product=60S ribosomal protein L29 | transcript_product=60S ribosomal protein L29 | location=Tb927_09_v5.1:1792681-1793118(+) | pr	16.266	69.981	216200000	37	2	3	4	2	6	3	4	2	6	3	4	2	6	26.2	26.9	15.9	40.7	145	10810000	15654000	3904900	38536000	0.0158065	0.964259	1	-0.0846109	0.943039	-0.0230367	20.3658	20.9	18.8969	22.1997
Tb927.10.2110; Tb927.10.2100; Tb927.10.2090; Tb11.v5.1046.1	Tb927.10.2110; Tb927.10.2100; Tb927.10.2090; Tb11.v5.1046.1	Tb927.10.2110 | transcript=Tb927.10.2110:mRNA | gene=Tb927.10.2110 | organism=Trypanosoma_brucei_brucei_TREU927 | gene_product=elongation factor 1-alpha | transcript_product=elongation factor 1-alpha | location=Tb927_10_v5.1:549417-550766(+) | prot	49.105	323.31	1814400000	155	4	14	16	11	17	14	16	11	17	14	16	11	17	33.2	38.3	30.1	39.9	449	235050000	203530000	139900000	349940000	0.00769883	0.982429	1	0.0166388	1.0116	0.00623294	23.2234	23.0157	22.4748	23.7976
Tb927.8.900	Tb927.8.900	Tb927.8.900 | transcript=Tb927.8.900:mRNA | gene=Tb927.8.900 | organism=Trypanosoma_brucei_brucei_TREU927 | gene_product=splicing factor TSR1 | transcript_product=splicing factor TSR1 | location=Tb927_08_v5.1:270276-271262(-) | protein_length=328 |	37.469	106.09	275930000	51	1	5	4	4	6	5	4	4	6	5	4	4	6	21.6	12.8	13.1	24.4	328	28853000	23439000	14329000	46027000	0.0065453	0.985042	1	-0.0180893	0.98754	-0.00633594	20.7822	20.4824	19.7724	21.456
Tb927.9.12240; Tb927.9.12200	Tb927.9.12240; Tb927.9.12200	Tb927.9.12240 | transcript=Tb927.9.12240:mRNA | gene=Tb927.9.12240 | organism=Trypanosoma_brucei_brucei_TREU927 | gene_product=60S ribosomal subunit protein L31, putative | transcript_product=60S ribosomal subunit protein L31, putative | location=T	21.692	170.19	204150000	32	2	3	2	1	3	3	2	1	3	3	2	1	3	22.9	12.8	9.6	22.3	188	15188000	3814400	4210700	14209000	0.0054124	0.987615	1	0.0232592	1.01625	0.00698928	21.2714	19.2781	19.4207	21.1754
Tb927.4.4410	Tb927.4.4410	Tb927.4.4410 | transcript=Tb927.4.4410:mRNA | gene=Tb927.4.4410 | organism=Trypanosoma_brucei_brucei_TREU927 | gene_product=adenylyl cyclase | transcript_product=adenylyl cyclase | location=Tb927_04_v5.1:1168174-1171908(-) | protein_length=1244 | s	138.25	1.7965	2380200	2	1	0	0	46	65	0	0	1	1	0	0	1	1	0	0	33.4	42.3	1244	0	0	949940	1430200	0.00436265	0.990005	1	0.00470066	1.00326	0.00201526	14.0175	14.3238	13.8802	14.4705
Tb927.3.4360; Tb927.11.6140	Tb927.3.4360; Tb927.11.6140	Tb927.3.4360 | transcript=Tb927.3.4360:mRNA | gene=Tb927.3.4360 | organism=Trypanosoma_brucei_brucei_TREU927 | gene_product=40S ribosomal protein S15A, putative | transcript_product=40S ribosomal protein S15A, putative | location=Tb927_03_v5.1:1223	14.645	24.496	80089000	10	2	1	1	1	2	1	1	1	2	1	1	1	2	8.5	8.5	8.5	21.5	130	5809000	5457500	3694500	8522500	0.00251145	0.994234	0.996114	-0.0049305	0.996588	-0.00189298	19.6625	19.5724	19.0096	20.2155
Tb927.5.320; Tb927.5.285b; Tb11.v5.0209.1; Tb927.5.330; Tb11.v5.0281.1; Tb11.v5.0217.1	Tb927.5.320; Tb927.5.285b; Tb11.v5.0209.1; Tb927.5.330; Tb11.v5.0281.1; Tb11.v5.0217.1	Tb927.5.320 | transcript=Tb927.5.320:mRNA | gene=Tb927.5.320 | organism=Trypanosoma_brucei_brucei_TREU927 | gene_product=receptor-type adenylate cyclase GRESAG 4, putative | transcript_product=receptor-type adenylate cyclase GRESAG 4, putative | lo	136.56	38.64	78795000	13	6	0	0	4	5	0	0	0	0	0	0	0	0	0	0	1.8	2.3	1236	0	0	0	0	NaN	#VALUE!	1	0	1	NaN	14.2369	13.8946	14.254	14.9706
Tb927.10.13040	Tb927.10.13040	Tb927.10.13040 | transcript=Tb927.10.13040:mRNA | gene=Tb927.10.13040 | organism=Trypanosoma_brucei_brucei_TREU927 | gene_product=procyclic-enriched flagellar receptor adenylate cyclase 4 | transcript_product=procyclic-enriched flagellar receptor a	133.33	36.56	21153000	11	1	0	0	1	1	0	0	0	0	0	0	0	0	0	0	0.9	0.9	1209	0	0	0	0	NaN	#VALUE!	1	0	1	NaN	15.1155	14.1224	15.2655	16.5819
Tb927.11.11290	Tb927.11.11290	Tb927.11.11290 | transcript=Tb927.11.11290:mRNA | gene=Tb927.11.11290 | organism=Trypanosoma_brucei_brucei_TREU927 | gene_product=heat shock protein 70, putative | transcript_product=heat shock protein 70, putative | location=Tb927_11_v5.1:3020888-	73.63	3.5098	10701000	5	1	2	1	1	5	0	0	0	0	0	0	0	0	4.4	2.1	3.4	7.8	676	0	0	0	0	NaN	#VALUE!	1	0	1	NaN	14.5373	13.4183	14.7389	15.498
Tb927.7.7470	Tb927.7.7470	Tb927.7.7470 | transcript=Tb927.7.7470:mRNA | gene=Tb927.7.7470 | organism=Trypanosoma_brucei_brucei_TREU927 | gene_product=procyclic-enriched flagellar receptor adenylate cyclase 3 | transcript_product=procyclic-enriched flagellar receptor adenyla	132.9	84.972	21072000	7	1	0	0	5	4	0	0	0	0	0	0	0	0	0	0	2.6	2.6	1205	0	0	0	0	NaN	#VALUE!	1	0	1	NaN	14.7374	14.8694	14.0587	14.4039

## Sheet: C3Y_PCF_all_raw
Protein IDs	Majority protein IDs	id	Fasta headers	Peptides	Razor + unique peptides	Unique peptides	Sequence coverage [%]	Unique + razor sequence coverage [%]	Unique sequence coverage [%]	Mol. weight [kDa]	Score	Intensity	MS/MS count	Number of proteins	Peptides PCF_WT1	Peptides PCF_WT2	Peptides PCF_YFP1	Peptides PCF_YFP2	Razor + unique peptides PCF_WT1	Razor + unique peptides PCF_WT2	Razor + unique peptides PCF_YFP1	Razor + unique peptides PCF_YFP2	Unique peptides PCF_WT1	Unique peptides PCF_WT2	Unique peptides PCF_YFP1	Unique peptides PCF_YFP2	Sequence length	Sequence coverage PCF_WT1 [%]	Sequence coverage PCF_WT2 [%]	Sequence coverage PCF_YFP1 [%]	Sequence coverage PCF_YFP2 [%]	Intensity PCF_WT1	Intensity PCF_WT2	Intensity PCF_YFP1	Intensity PCF_YFP2	-Log Student's T-test p-value PCF_YFP_PCF_WT	p value	Student's T-test q-value PCF_YFP_PCF_WT	Student's T-test Difference PCF_YFP_PCF_WT	fold change	Student's T-test Test statistic PCF_YFP_PCF_WT	iBAQ PCF_WT1	iBAQ PCF_WT2	iBAQ PCF_YFP1	iBAQ PCF_YFP2
Tb927.11.11690	Tb927.11.11690	254	Tb927.11.11690 | transcript=Tb927.11.11690:mRNA | gene=Tb927.11.11690 | organism=Trypanosoma_brucei_brucei_TREU927 | gene_product=Vacuolar proton pump subunit B, putative | transcript_product=Vacuolar proton pump subunit B, putative | location=Tb92	4	4	4	12.9	12.9	12.9	55.619	18.221	10580000	7	1	0	0	4	3	0	0	4	3	0	0	4	3	495	0	0	12.9	10.9	0	0	5357700	5222600	4.13966	7.25e-05	0	3.54874	11.7025	117.438	14.225	14.1771	17.7682	17.7314
Tb927.4.3060	Tb927.4.3060	460	Tb927.4.3060 | transcript=Tb927.4.3060:mRNA | gene=Tb927.4.3060 | organism=Trypanosoma_brucei_brucei_TREU927 | gene_product=hypothetical protein, conserved | transcript_product=hypothetical protein, conserved | location=Tb927_04_v5.1:810076-810522(	1	1	1	6.1	6.1	6.1	17.732	1.7485	9412700	5	1	0	0	1	1	0	0	1	1	0	0	1	1	148	0	0	6.1	6.1	0	0	2430200	3149000	2.95121	0.00111891	0.272	5.7207	52.7353	29.8702	13.7206	13.6371	19.2126	19.5865
Tb927.5.320; Tb927.5.285b; Tb11.v5.0209.1; Tb927.5.330; Tb11.v5.0281.1; Tb11.v5.0217.1	Tb927.5.320; Tb927.5.285b; Tb11.v5.0209.1; Tb927.5.330; Tb11.v5.0281.1; Tb11.v5.0217.1	47	Tb927.5.320 | transcript=Tb927.5.320:mRNA | gene=Tb927.5.320 | organism=Trypanosoma_brucei_brucei_TREU927 | gene_product=receptor-type adenylate cyclase GRESAG 4, putative | transcript_product=receptor-type adenylate cyclase GRESAG 4, putative | lo	13	8	6	11.1	8.7	7.3	136.56	38.64	78795000	13	6	0	0	7	8	0	0	7	7	0	0	6	5	1236	0	0	7.8	7.5	0	0	33481000	45314000	2.81531	0.00152998	0.181333	5.73465	53.2479	25.5363	13.7554	13.8607	19.3244	19.761
Tb927.7.5340	Tb927.7.5340	570	Tb927.7.5340 | transcript=Tb927.7.5340:mRNA | gene=Tb927.7.5340 | organism=Trypanosoma_brucei_brucei_TREU927 | gene_product=cAMP response protein 3 | transcript_product=cAMP response protein 3 | location=Tb927_07_v5.1:1419326-1420822(+) | protein_l	50	50	50	74.5	74.5	74.5	56.822	323.31	24739000000	220	1	0	0	29	33	0	0	29	33	0	0	29	33	498	0	0	53.6	61.8	0	0	2133600000	2996000000	2.79757	0.00159379	0.136	11.2887	2501.74	25.0187	14.8674	15.6253	26.2902	26.7799
Tb927.11.13740	Tb927.11.13740	267	Tb927.11.13740 | transcript=Tb927.11.13740:mRNA | gene=Tb927.11.13740 | organism=Trypanosoma_brucei_brucei_TREU927 | gene_product=procyclic-enriched flagellar receptor adenylate cyclase 5 | transcript_product=procyclic-enriched flagellar receptor a	18	15	14	22.4	20.4	19.3	133.78	107.12	119320000	26	1	0	0	12	14	0	0	11	13	0	0	10	12	1214	0	0	17.9	16.5	0	0	52312000	63554000	2.70191	0.00198652	0.2176	6.2478	75.9935	22.403	13.7377	14.2196	20.086	20.3669
Tb927.1.3820	Tb927.1.3820	95	Tb927.1.3820 | transcript=Tb927.1.3820:mRNA | gene=Tb927.1.3820 | organism=Trypanosoma_brucei_brucei_TREU927 | gene_product=ATP synthase subunit, putative | transcript_product=ATP synthase subunit, putative | location=Tb927_01_v5.1:815748-816149(+)	1	1	1	25.6	25.6	25.6	14.198	14.813	4884500	2	1	0	0	1	1	0	0	1	1	0	0	1	1	133	0	0	25.6	25.6	0	0	1969800	2914700	2.10694	0.00781741	0.348	5.72052	52.729	11.2437	13.8948	13.0487	18.9096	19.4749
Tb927.7.7470	Tb927.7.7470	586	Tb927.7.7470 | transcript=Tb927.7.7470:mRNA | gene=Tb927.7.7470 | organism=Trypanosoma_brucei_brucei_TREU927 | gene_product=procyclic-enriched flagellar receptor adenylate cyclase 3 | transcript_product=procyclic-enriched flagellar receptor adenyla	10	4	4	6.7	3.6	3.6	132.9	84.972	21072000	7	1	0	0	4	6	0	0	2	4	0	0	2	4	1205	0	0	4.1	5.1	0	0	8556600	12516000	2.03662	0.00919134	0.298286	3.5662	11.8449	10.3586	13.8563	14.2724	17.3562	17.9048
Tb927.4.4430	Tb927.4.4430	470	Tb927.4.4430 | transcript=Tb927.4.4430:mRNA | gene=Tb927.4.4430 | organism=Trypanosoma_brucei_brucei_TREU927 | gene_product=adenylyl cyclase | transcript_product=adenylyl cyclase | location=Tb927_04_v5.1:1177872-1181603(-) | protein_length=1243 | s	75	75	6	47.4	47.4	5.4	138.27	323.31	3837100000	159	1	0	0	5	8	0	0	5	8	0	0	0	0	1243	0	0	7.5	10.5	0	0	9592200	18073000	1.78347	0.0164637	0.261	3.74832	13.4387	7.697	13.7336	14.0705	17.1934	18.1073
Tb927.2.4550	Tb927.2.4550	388	Tb927.2.4550 | transcript=Tb927.2.4550:mRNA | gene=Tb927.2.4550 | organism=Trypanosoma_brucei_brucei_TREU927 | gene_product=2-O-ribose RNA methyltransferase SPB1 homolog | transcript_product=2-O-ribose RNA methyltransferase SPB1 homolog | locatio	3	3	3	6.3	6.3	6.3	102.88	4.9853	3919700	3	1	0	0	1	2	0	0	1	2	0	0	1	2	905	0	0	2.8	3.5	0	0	1708200	2211600	1.72731	0.0187364	0.232	1.80985	3.50605	7.20255	13.5196	13.8568	15.3117	15.6843
Tb927.8.2310	Tb927.8.2310	602	Tb927.8.2310 | transcript=Tb927.8.2310:mRNA | gene=Tb927.8.2310 | organism=Trypanosoma_brucei_brucei_TREU927 | gene_product=(H+)-ATPase G subunit, putative | transcript_product=(H+)-ATPase G subunit, putative | location=Tb927_08_v5.1:699549-699878(	1	1	1	12.8	12.8	12.8	12.749	4.014	3933700	2	1	0	0	1	1	0	0	1	1	0	0	1	1	109	0	0	12.8	12.8	0	0	1660200	2273500	1.70659	0.0196522	0.2088	4.89931	29.8427	7.02779	14.3277	13.0092	18.341	18.7946
Tb927.9.8160	Tb927.9.8160	716	Tb927.9.8160 | transcript=Tb927.9.8160:mRNA | gene=Tb927.9.8160 | organism=Trypanosoma_brucei_brucei_TREU927 | gene_product=chaperone protein DnaJ, putative | transcript_product=chaperone protein DnaJ, putative | location=Tb927_09_v5.1:1339368-1340	3	3	3	8.1	8.1	8.1	47.83	27.597	42679000	7	1	0	0	3	3	0	0	3	3	0	0	3	3	430	0	0	8.1	8.1	0	0	17489000	25191000	1.50677	0.031134	0.272727	5.95804	62.1655	5.53418	14.9496	12.8617	19.6005	20.1269
Tb927.10.9400	Tb927.10.9400	226	Tb927.10.9400 | transcript=Tb927.10.9400:mRNA | gene=Tb927.10.9400 | organism=Trypanosoma_brucei_brucei_TREU927 | gene_product=splicing factor 1 | transcript_product=splicing factor 1 | location=Tb927_10_v5.1:2324478-2325293(+) | protein_length=271	5	5	5	23.2	23.2	23.2	31.63	21.857	32896000	11	1	0	0	1	1	0	0	1	1	0	0	1	1	271	0	0	5.5	5.5	0	0	2343200	3465000	1.50586	0.0311988	0.25	3.56368	11.8243	5.52815	14.4581	13.2989	17.16	17.7244
Tb927.10.14930	Tb927.10.14930	146	Tb927.10.14930 | transcript=Tb927.10.14930:mRNA | gene=Tb927.10.14930 | organism=Trypanosoma_brucei_brucei_TREU927 | gene_product=Zinc finger CCCH domain-containing protein 39 | transcript_product=Zinc finger CCCH domain-containing protein 39 | loc	2	2	2	12.3	12.3	12.3	31.519	6.1106	9110700	4	1	0	0	1	2	0	0	1	2	0	0	1	2	285	0	0	4.9	12.3	0	0	2139500	6394600	1.47389	0.0335821	0.230769	4.71673	26.2952	5.31849	12.8912	13.6979	17.2215	18.8011
Tb927.11.13140; Tb927.11.13125	Tb927.11.13140; Tb927.11.13125	261	Tb927.11.13140 | transcript=Tb927.11.13140:mRNA | gene=Tb927.11.13140 | organism=Trypanosoma_brucei_brucei_TREU927 | gene_product=cytochrome oxidase subunit X | transcript_product=cytochrome oxidase subunit X | location=Tb927_11_v5.1:3520862-352121	4	4	4	45.7	45.7	45.7	13.672	8.582	17639000	6	2	0	0	1	4	0	0	1	4	0	0	1	4	116	0	0	9.5	45.7	0	0	3219000	14420000	1.4527	0.0352613	0.246857	5.67417	51.0619	5.1835	14.3863	14.0504	18.8108	20.9742
Tb927.4.2180	Tb927.4.2180	449	Tb927.4.2180 | transcript=Tb927.4.2180:mRNA | gene=Tb927.4.2180 | organism=Trypanosoma_brucei_brucei_TREU927 | gene_product=60S ribosomal protein L35a, putative | transcript_product=60S ribosomal protein L35a, putative | location=Tb927_04_v5.1:5606	11	11	11	65.8	65.8	65.8	17.021	93.228	358480000	73	1	7	5	10	10	7	5	10	10	7	5	10	10	149	58.4	37.6	65.8	59.7	27974000	18769000	61507000	69955000	1.42577	0.0375172	0.2608	1.51736	2.86267	5.01637	21.7376	21.1618	22.8743	23.0599
Tb927.10.2890; Tb11.v5.0650.1	Tb927.10.2890; Tb11.v5.0650.1	70	Tb927.10.2890 | transcript=Tb927.10.2890:mRNA | gene=Tb927.10.2890 | organism=Trypanosoma_brucei_brucei_TREU927 | gene_product=enolase | transcript_product=enolase | location=Tb927_10_v5.1:746309-747598(+) | protein_length=429 | sequence_SO=chromos	17	17	17	40.3	40.3	40.3	46.592	204.06	291280000	66	2	1	0	4	9	1	0	4	9	1	0	4	9	429	3.5	0	9.8	26.6	968050	0	7088700	20426000	1.39999	0.0398112	0.2445	3.75831	13.532	4.86094	15.2409	14.9958	18.1132	19.64
Tb927.10.13040	Tb927.10.13040	128	Tb927.10.13040 | transcript=Tb927.10.13040:mRNA | gene=Tb927.10.13040 | organism=Trypanosoma_brucei_brucei_TREU927 | gene_product=procyclic-enriched flagellar receptor adenylate cyclase 4 | transcript_product=procyclic-enriched flagellar receptor a	9	8	8	12.1	11.2	11.2	133.33	36.56	21153000	11	1	0	0	6	7	0	0	5	6	0	0	5	6	1209	0	0	8.9	8.6	0	0	6544200	14609000	1.38995	0.0407425	0.288941	3.5924	12.062	4.80154	14.3742	13.4273	16.9138	18.0724
Tb927.7.320	Tb927.7.320	554	Tb927.7.320 | transcript=Tb927.7.320:mRNA | gene=Tb927.7.320 | organism=Trypanosoma_brucei_brucei_TREU927 | gene_product=RNA-binding protein 8 | transcript_product=RNA-binding protein 8 | location=Tb927_07_v5.1:59534-60076(-) | protein_length=180 |	4	4	4	33.9	33.9	33.9	20.27	11.808	16645000	6	1	1	1	1	3	1	1	1	3	1	1	1	3	180	10	10	7.8	23.9	1561500	1198200	4489500	9395800	1.23693	0.0579526	0.500889	2.24739	4.74824	3.9712	17.115	16.733	18.6387	19.7041
Tb927.4.4490	Tb927.4.4490	474	Tb927.4.4490 | transcript=Tb927.4.4490:mRNA | gene=Tb927.4.4490 | organism=Trypanosoma_brucei_brucei_TREU927 | gene_product=multidrug resistance protein E | transcript_product=multidrug resistance protein E | location=Tb927_04_v5.1:1209090-1214369(	25	25	25	17.2	17.2	17.2	193.8	83.554	104350000	40	1	0	0	12	24	0	0	12	24	0	0	12	24	1759	0	0	8.9	17.1	0	0	22546000	81809000	1.21798	0.060537	0.498526	4.31933	19.964	3.87743	14.0655	15.2928	18.0688	19.9282
Tb927.3.1030	Tb927.3.1030	399	Tb927.3.1030 | transcript=Tb927.3.1030:mRNA | gene=Tb927.3.1030 | organism=Trypanosoma_brucei_brucei_TREU927 | gene_product=RNA-binding protein | transcript_product=RNA-binding protein | location=Tb927_03_v5.1:253218-254291(+) | protein_length=357	4	4	4	23	23	23	39.272	10.351	24284000	10	1	0	1	3	3	0	1	3	3	0	1	3	3	357	0	6.2	18.5	15.7	0	1565500	5457200	9404200	1.21592	0.0608242	0.4736	2.80358	6.9817	3.86736	14.8357	16.0546	17.8562	18.6413
Tb927.2.4210	Tb927.2.4210	382	Tb927.2.4210 | transcript=Tb927.2.4210:mRNA | gene=Tb927.2.4210 | organism=Trypanosoma_brucei_brucei_TREU927 | gene_product=Phosphoenolpyruvate carboxykinase [ATP], glycosomal | transcript_product=Phosphoenolpyruvate carboxykinase [ATP], glycosomal	4	4	4	12.4	12.4	12.4	58.564	17.121	5453700	6	1	0	0	2	4	0	0	2	4	0	0	2	4	525	0	0	6.7	12.4	0	0	1470200	3983400	1.18153	0.0658371	0.51619	2.77763	6.85726	3.70217	13.2145	13.6434	15.4876	16.9256
Tb927.3.5370	Tb927.3.5370	433	Tb927.3.5370 | transcript=Tb927.3.5370:mRNA | gene=Tb927.3.5370 | organism=Trypanosoma_brucei_brucei_TREU927 | gene_product=hypothetical protein, conserved | transcript_product=hypothetical protein, conserved | location=Tb927_03_v5.1:1504126-150506	2	2	2	7.3	7.3	7.3	34.254	1.7572	8390900	5	1	0	0	1	2	0	0	1	2	0	0	1	2	313	0	0	3.2	7.3	0	0	1559200	4857800	1.16381	0.0685781	0.492727	3.88621	14.7865	3.61935	12.9055	14.2926	16.6655	18.305
Tb927.3.4720	Tb927.3.4720	423	Tb927.3.4720 | transcript=Tb927.3.4720:mRNA | gene=Tb927.3.4720 | organism=Trypanosoma_brucei_brucei_TREU927 | gene_product=dynamin-1-like protein | transcript_product=dynamin-1-like protein | location=Tb927_03_v5.1:1334486-1336468(-) | protein_len	23	23	8	39.8	39.8	13.5	73.321	323.31	549660000	72	1	0	1	2	6	0	1	2	6	0	0	0	0	660	0	2.4	4.8	11.2	0	862400	5402900	19501000	1.14322	0.0719078	0.510957	4.41791	21.3759	3.52496	12.6023	14.2917	16.9391	18.7908
Tb927.6.5040	Tb927.6.5040	530	Tb927.6.5040 | transcript=Tb927.6.5040:mRNA | gene=Tb927.6.5040 | organism=Trypanosoma_brucei_brucei_TREU927 | gene_product=ribosomal protein L15, putative | transcript_product=ribosomal protein L15, putative | location=Tb927_06_v5.1:1380714-138132	8	8	1	41.7	41.7	5.4	24.433	54.914	234270000	42	1	4	2	5	6	4	2	5	6	1	0	1	1	204	31.4	13.2	22.1	28.9	16861000	8536100	37440000	48929000	1.13278	0.0736586	0.546667	1.835	3.56772	3.47783	21.1998	20.2177	22.3507	22.7368
Tb927.1.3070	Tb927.1.3070	91	Tb927.1.3070 | transcript=Tb927.1.3070:mRNA | gene=Tb927.1.3070 | organism=Trypanosoma_brucei_brucei_TREU927 | gene_product=hypothetical protein, conserved | transcript_product=hypothetical protein, conserved | location=Tb927_01_v5.1:675213-676454(	4	4	4	15.7	15.7	15.7	44.99	11.02	29533000	10	1	2	1	3	4	2	1	3	4	2	1	3	4	413	7	2.9	10.2	15.7	4293700	1815000	10641000	12783000	1.08022	0.0831345	0.67072	2.06276	4.17785	3.24813	17.5744	16.3321	18.8837	19.1483
Tb927.10.6070	Tb927.10.6070	198	Tb927.10.6070 | transcript=Tb927.10.6070:mRNA | gene=Tb927.10.6070 | organism=Trypanosoma_brucei_brucei_TREU927 | gene_product=universal minicircle sequence binding protein 1 | transcript_product=universal minicircle sequence binding protein 1 | lo	11	10	10	76.4	76.4	76.4	14.566	117.53	2853500000	80	1	10	8	9	11	9	7	8	10	9	7	8	10	140	72.1	67.9	72.1	76.4	297190000	211620000	490830000	759180000	1.07329	0.0844712	0.662462	1.2834	2.43412	3.21876	24.8249	24.335	25.5487	26.1779
Tb927.10.12840	Tb927.10.12840	127	Tb927.10.12840 | transcript=Tb927.10.12840:mRNA | gene=Tb927.10.12840 | organism=Trypanosoma_brucei_brucei_TREU927 | gene_product=mitochondrial carrier protein | transcript_product=mitochondrial carrier protein | location=Tb927_10_v5.1:3120238-3121	11	11	11	40.1	40.1	40.1	33.131	38.242	93637000	24	1	4	1	6	9	4	1	6	9	4	1	6	9	304	14.8	6.6	20.7	34.9	10800000	3637300	29245000	48830000	1.01688	0.0961882	0.688593	2.59197	6.02921	2.9869	19.4577	17.8876	20.8948	21.6344
Tb927.6.180; Tb11.v5.0456.1; Tb927.6.170; Tb11.v5.0431.1; Tb11.v5.0546.1; Tb927.6.320; Tb927.6.200; Tb11.v5.0425.1; Tb11.v5.0576.1; Tb927.6.790; Tb927.6.780; Tb927.6.770; Tb927.6.760; Tb927.6.430; Tb927.6.800	Tb927.6.180; Tb11.v5.0456.1; Tb927.6.170; Tb11.v5.0431.1; Tb11.v5.0546.1; Tb927.6.320; Tb927.6.200; Tb11.v5.0425.1; Tb11.v5.0576.1; Tb927.6.790; Tb927.6.780; Tb927.6.770; Tb927.6.760; Tb927.6.430; Tb927.6.800	56	Tb927.6.180 | transcript=Tb927.6.180:mRNA | gene=Tb927.6.180 | organism=Trypanosoma_brucei_brucei_TREU927 | gene_product=receptor-type adenylate cyclase GRESAG 4, putative | transcript_product=receptor-type adenylate cyclase GRESAG 4, putative | lo	17	3	1	9.7	3.2	1.2	140.36	10.945	100090000	4	15	0	0	3	4	0	0	1	2	0	0	1	1	1268	0	0	4.2	4.7	0	0	2579600	6559600	1.01398	0.0968326	0.664	2.30562	4.94382	2.97532	14.1432	13.3757	15.3918	16.7383
Tb927.9.15050	Tb927.9.15050	683	Tb927.9.15050 | transcript=Tb927.9.15050:mRNA | gene=Tb927.9.15050 | organism=Trypanosoma_brucei_brucei_TREU927 | gene_product=nexin-dynein regulatory complex 4 | transcript_product=nexin-dynein regulatory complex 4 | location=Tb927_09_v5.1:2349174	2	2	2	5	5	5	54.165	2.6967	4521400	3	1	1	0	1	1	1	0	1	1	1	0	1	1	461	2.4	0	2.6	2.6	657630	0	1370900	2492800	0.997872	0.100491	0.672552	2.04583	4.12912	2.91163	14.683	13.5737	15.7429	16.6055
Tb927.4.1800; Tb927.4.1790	Tb927.4.1800; Tb927.4.1790	444	Tb927.4.1800 | transcript=Tb927.4.1800:mRNA | gene=Tb927.4.1800 | organism=Trypanosoma_brucei_brucei_TREU927 | gene_product=Mitochondrial ribosomal protein L3 | transcript_product=Mitochondrial ribosomal protein L3 | location=Tb927_04_v5.1:450119-4	23	23	23	60.8	60.8	60.8	48.691	154.63	572080000	99	2	8	8	12	17	8	8	12	17	8	8	12	17	429	21.4	21.9	38	54.1	39839000	31299000	67441000	125660000	0.987545	0.102909	0.665333	1.38239	2.607	2.87131	20.7241	20.376	21.4836	22.3813
Tb927.10.14700	Tb927.10.14700	142	Tb927.10.14700 | transcript=Tb927.10.14700:mRNA | gene=Tb927.10.14700 | organism=Trypanosoma_brucei_brucei_TREU927 | gene_product=hypothetical protein, conserved | transcript_product=hypothetical protein, conserved | location=Tb927_10_v5.1:3590736-	4	4	4	13.7	13.7	13.7	37.7	21.505	270790000	29	1	3	2	4	4	3	2	4	4	3	2	4	4	342	10.8	7.3	13.7	13.7	28164000	13178000	55341000	59621000	0.985454	0.103406	0.643871	1.57611	2.98165	2.86319	20.7473	19.6516	21.7218	21.8293
Tb927.7.2680	Tb927.7.2680	547	Tb927.7.2680 | transcript=Tb927.7.2680:mRNA | gene=Tb927.7.2680 | organism=Trypanosoma_brucei_brucei_TREU927 | gene_product=zinc finger protein family member, putative | transcript_product=zinc finger protein family member, putative | location=Tb92	3	3	3	7.9	7.9	7.9	76.183	4.4784	6413900	5	1	0	0	1	3	0	0	1	3	0	0	1	3	708	0	0	2.8	7.9	0	0	1510900	4903000	0.9405	0.114683	0.695	2.42743	5.37933	2.6926	13.9298	13.3237	15.2051	16.9032
Tb927.10.6060; Tb11.v5.0199.1	Tb927.10.6060; Tb11.v5.0199.1	46	Tb927.10.6060 | transcript=Tb927.10.6060:mRNA | gene=Tb927.10.6060 | organism=Trypanosoma_brucei_brucei_TREU927 | gene_product=universal minicircle sequence binding protein 2 | transcript_product=universal minicircle sequence binding protein 2 | lo	11	11	10	81.7	81.7	81.7	21.836	202.72	737640000	87	2	9	7	8	11	9	7	8	11	8	6	7	10	213	75.1	60.1	69.5	81.7	71984000	59338000	109510000	192140000	0.937729	0.115417	0.687758	1.15019	2.21943	2.68232	22.1943	21.9156	22.7996	23.6107
Tb927.10.2240	Tb927.10.2240	161	Tb927.10.2240 | transcript=Tb927.10.2240:mRNA | gene=Tb927.10.2240 | organism=Trypanosoma_brucei_brucei_TREU927 | gene_product=RNA binding protein | transcript_product=RNA binding protein | location=Tb927_10_v5.1:578334-580100(+) | protein_length=5	8	8	8	29.3	29.3	29.3	66.352	230.84	303640000	45	1	7	3	6	5	7	3	6	5	7	3	6	5	588	25.3	7.3	18.4	13.3	43292000	20989000	74651000	80153000	0.912809	0.122234	0.748	1.35962	2.56617	2.59106	20.5602	19.5158	21.3463	21.4489
Tb927.6.4300; Tb927.6.4280	Tb927.6.4300; Tb927.6.4280	526	Tb927.6.4300 | transcript=Tb927.6.4300:mRNA | gene=Tb927.6.4300 | organism=Trypanosoma_brucei_brucei_TREU927 | gene_product=glyceraldehyde 3-phosphate dehydrogenase, glycosomal | transcript_product=glyceraldehyde 3-phosphate dehydrogenase, glycosom	23	23	23	67.1	67.1	67.1	39.047	210.93	977610000	119	2	10	7	12	18	10	7	12	18	10	7	12	18	359	36.8	24.2	46	55.2	31474000	15380000	61248000	149420000	0.906982	0.123885	0.752686	2.12038	4.34809	2.57002	20.3841	19.351	21.3446	22.6313
Tb927.7.2670	Tb927.7.2670	546	Tb927.7.2670 | transcript=Tb927.7.2670:mRNA | gene=Tb927.7.2670 | organism=Trypanosoma_brucei_brucei_TREU927 | gene_product=zinc finger protein family member, putative | transcript_product=zinc finger protein family member, putative | location=Tb92	6	6	4	19.3	19.3	13.2	49.686	34.876	34029000	13	1	2	2	3	6	2	2	3	6	2	1	2	4	461	7.2	7.8	11.7	19.3	4426700	4048800	7793700	17760000	0.878141	0.132391	0.744444	1.47456	2.779	2.46755	17.3774	17.2486	18.1934	19.3817
Tb927.10.7700	Tb927.10.7700	212	Tb927.10.7700 | transcript=Tb927.10.7700:mRNA | gene=Tb927.10.7700 | organism=Trypanosoma_brucei_brucei_TREU927 | gene_product=ATP-binding cassette protein subfamily G | transcript_product=ATP-binding cassette protein subfamily G | location=Tb927_1	1	1	1	2.7	2.7	2.7	75.051	1.4023	3188800	2	1	0	0	1	1	0	0	1	1	0	0	1	1	668	0	0	2.7	2.7	0	0	1029800	2159000	0.877617	0.132551	0.724324	1.83777	3.57457	2.46572	14.4352	13.3953	15.219	16.2871
Tb927.2.4400	Tb927.2.4400	384	Tb927.2.4400 | transcript=Tb927.2.4400:mRNA | gene=Tb927.2.4400 | organism=Trypanosoma_brucei_brucei_TREU927 | gene_product=SSU ribosomal protein, mitochondrial, putative | transcript_product=SSU ribosomal protein, mitochondrial, putative | locatio	3	3	3	2.8	2.8	2.8	136.9	4.627	4468100	3	1	0	0	1	2	0	0	1	2	0	0	1	2	1181	0	0	1.1	1.7	0	0	2087200	2380900	0.85563	0.139435	0.777263	1.69755	3.2435	2.38941	12.6865	14.0946	14.9932	15.1831
Tb927.11.6440	Tb927.11.6440	342	Tb927.11.6440 | transcript=Tb927.11.6440:mRNA | gene=Tb927.11.6440 | organism=Trypanosoma_brucei_brucei_TREU927 | gene_product=hypothetical protein, conserved | transcript_product=hypothetical protein, conserved | location=Tb927_11_v5.1:1821094-182	4	4	4	11.6	11.6	11.6	48.841	14.487	62317000	16	1	2	2	3	3	2	2	3	3	2	2	3	3	441	5.9	5.9	8.6	8.8	9567600	5220600	14298000	25755000	0.84863	0.1417	0.771282	1.44105	2.71518	2.36544	18.8678	17.9939	19.4474	20.2964
Tb927.6.720; Tb927.11.11230	Tb927.6.720; Tb927.11.11230	248	Tb927.6.720 | transcript=Tb927.6.720:mRNA | gene=Tb927.6.720 | organism=Trypanosoma_brucei_brucei_TREU927 | gene_product=40S ribosomal protein L14, putative | transcript_product=40S ribosomal protein L14, putative | location=Tb927_06_v5.1:298195-29	12	12	12	32.8	32.8	32.8	21.443	45.348	137620000	36	2	3	4	6	7	3	4	6	7	3	4	6	7	189	29.6	20.6	30.7	29.6	12518000	6996200	17750000	30334000	0.828135	0.148547	0.8432	1.31009	2.47957	2.29608	20.7702	19.9308	21.274	22.0471
Tb927.7.2140; Tb07.11L3.90	Tb927.7.2140; Tb07.11L3.90	29	Tb927.7.2140 | transcript=Tb927.7.2140:mRNA | gene=Tb927.7.2140 | organism=Trypanosoma_brucei_brucei_TREU927 | gene_product=zinc finger protein family member, putative | transcript_product=zinc finger protein family member, putative | location=Tb92	3	3	3	15.2	15.2	15.2	40.864	26.279	22327000	10	2	1	1	2	3	1	1	2	3	1	1	2	3	376	5.3	3.2	8.5	15.2	2041400	683930	3355900	7176600	0.780124	0.165911	0.922732	2.05425	4.15329	2.13835	17.3762	15.7985	18.0933	19.1899
Tb927.9.6070; Tb927.10.11540	Tb927.9.6070; Tb927.10.11540	118	Tb927.9.6070 | transcript=Tb927.9.6070:mRNA | gene=Tb927.9.6070 | organism=Trypanosoma_brucei_brucei_TREU927 | gene_product=40S ribosomal protein S3, putative | transcript_product=40S ribosomal protein S3, putative | location=Tb927_09_v5.1:1008372-	14	14	14	60.7	60.7	60.7	24.216	140.83	475750000	58	2	4	4	7	11	4	4	7	11	4	4	7	11	214	24.8	28	44.4	57.5	43338000	22797000	62022000	132240000	0.777997	0.166726	0.900762	1.52668	2.88121	2.13151	21.7842	20.8574	22.3013	23.3936
Tb927.9.15210	Tb927.9.15210	686	Tb927.9.15210 | transcript=Tb927.9.15210:mRNA | gene=Tb927.9.15210 | organism=Trypanosoma_brucei_brucei_TREU927 | gene_product=ribosomal protein L36, putative | transcript_product=ribosomal protein L36, putative | location=Tb927_09_v5.1:2362520-236	5	5	1	38.5	38.5	13.8	12.457	66.229	111040000	18	1	2	3	3	4	2	3	3	4	0	0	0	0	109	23.9	24.8	24.8	33	15159000	6801700	21251000	34746000	0.76628	0.171285	0.901023	1.42018	2.67619	2.09405	22.8536	21.6974	23.3411	24.0503
Tb927.11.6280	Tb927.11.6280	339	Tb927.11.6280 | transcript=Tb927.11.6280:mRNA | gene=Tb927.11.6280 | organism=Trypanosoma_brucei_brucei_TREU927 | gene_product=pyruvate phosphate dikinase | transcript_product=pyruvate phosphate dikinase | location=Tb927_11_v5.1:1768333-1771074(-)	19	19	19	32.4	32.4	32.4	100.45	146.24	105050000	37	1	6	3	10	15	6	3	10	15	6	3	10	15	913	14.5	6.2	19.6	23.8	11482000	4415500	19798000	69350000	0.765875	0.171445	0.880545	2.37957	5.20382	2.09276	17.7524	16.3737	18.5384	20.3469
Tb927.10.9840	Tb927.10.9840	230	Tb927.10.9840 | transcript=Tb927.10.9840:mRNA | gene=Tb927.10.9840 | organism=Trypanosoma_brucei_brucei_TREU927 | gene_product=chaperone protein DnaJ, putative | transcript_product=chaperone protein DnaJ, putative | location=Tb927_10_v5.1:2433556-2	5	5	5	22.5	22.5	22.5	29.823	16.603	63194000	23	1	3	2	4	4	3	2	4	4	3	2	4	4	262	16.4	13	16.4	16.4	5944100	6034800	8805200	18026000	0.760379	0.173628	0.860978	1.0728	2.10351	2.07532	18.503	18.5249	19.0699	20.1035
Tb927.2.4710	Tb927.2.4710	389	Tb927.2.4710 | transcript=Tb927.2.4710:mRNA | gene=Tb927.2.4710 | organism=Trypanosoma_brucei_brucei_TREU927 | gene_product=RNA-binding protein, putative | transcript_product=RNA-binding protein, putative | location=Tb927_02_v5.1:834116-835441(-) |	10	10	10	26.3	26.3	26.3	49.983	33.373	104890000	31	1	3	3	4	7	3	3	4	7	3	3	4	7	441	8.8	8.6	12.9	20.2	9562100	4670800	12778000	26727000	0.729202	0.186551	0.961217	1.46741	2.76525	1.97785	18.7966	17.7629	19.2149	20.2795
Tb927.8.1560	Tb927.8.1560	598	Tb927.8.1560 | transcript=Tb927.8.1560:mRNA | gene=Tb927.8.1560 | organism=Trypanosoma_brucei_brucei_TREU927 | gene_product=hypothetical protein, conserved | transcript_product=hypothetical protein, conserved | location=Tb927_08_v5.1:508257-510107(	1	1	1	1.8	1.8	1.8	69.483	2.9977	2828600	2	1	0	0	1	1	0	0	1	1	0	0	1	1	616	0	0	1.8	1.8	0	0	1090900	1737600	0.727984	0.187075	0.950468	1.20496	2.30531	1.97409	13.6782	14.6977	15.0571	15.7287
Tb927.8.900	Tb927.8.900	650	Tb927.8.900 | transcript=Tb927.8.900:mRNA | gene=Tb927.8.900 | organism=Trypanosoma_brucei_brucei_TREU927 | gene_product=splicing factor TSR1 | transcript_product=splicing factor TSR1 | location=Tb927_08_v5.1:270276-271262(-) | protein_length=328 |	9	9	9	31.1	31.1	31.1	37.469	106.09	275930000	51	1	5	5	6	9	5	5	6	9	5	5	6	9	328	17.4	18	17.7	31.1	24782000	28310000	36892000	73302000	0.713362	0.193481	0.987667	0.973332	1.96337	1.92925	20.5627	20.7547	21.1368	22.1274
Tb927.9.9290	Tb927.9.9290	723	Tb927.9.9290 | transcript=Tb927.9.9290:mRNA | gene=Tb927.9.9290 | organism=Trypanosoma_brucei_brucei_TREU927 | gene_product=polyadenylate-binding protein 1 | transcript_product=polyadenylate-binding protein 1 | location=Tb927_09_v5.1:1478398-148009	5	5	5	13.1	13.1	13.1	63.029	20.128	11199000	9	1	2	0	2	5	2	0	2	5	2	0	2	5	566	4.8	0	5.8	13.1	1629000	0	2549900	7020200	0.666651	0.215451	1	2.69258	6.46468	1.78935	15.8282	13.1971	16.4747	17.9357
Tb927.11.4300; Tb927.10.9880	Tb927.11.4300; Tb927.10.9880	231	Tb927.11.4300 | transcript=Tb927.11.4300:mRNA | gene=Tb927.11.4300 | organism=Trypanosoma_brucei_brucei_TREU927 | gene_product=60S ribosomal protein L18, putative | transcript_product=60S ribosomal protein L18, putative | location=Tb927_11_v5.1:125	14	14	14	60.6	60.6	60.6	21.874	143.26	379310000	66	2	9	7	9	8	9	7	9	8	9	7	9	8	193	52.3	43	51.8	49.2	45164000	23016000	53338000	72987000	0.662104	0.217719	1	0.952546	1.93529	1.77599	22.6213	21.6487	22.8613	23.3138
Tb927.11.13007; Tb927.11.13003; Tb11.v5.0537.1; Tb927.11.9920; Tb11.01.1680.v5.1	Tb927.11.13007; Tb927.11.13003; Tb11.v5.0537.1; Tb927.11.9920; Tb11.01.1680.v5.1	34	Tb927.11.13007 | transcript=Tb927.11.13007:mRNA | gene=Tb927.11.13007 | organism=Trypanosoma_brucei_brucei_TREU927 | gene_product=ubiquitin-60S ribosomal protein L40 | transcript_product=ubiquitin-60S ribosomal protein L40 | location=Tb927_11_v5.1:	2	2	2	23.4	23.4	23.4	14.656	9.2362	20101000	9	5	2	1	2	2	2	1	2	2	2	1	2	2	128	23.4	9.4	23.4	23.4	3228000	865380	4992700	5406800	0.64286	0.227583	1	1.63627	3.10862	1.71994	19.0372	17.138	19.6664	19.7814
Tb927.11.4360	Tb927.11.4360	319	Tb927.11.4360 | transcript=Tb927.11.4360:mRNA | gene=Tb927.11.4360 | organism=Trypanosoma_brucei_brucei_TREU927 | gene_product=Protein of unknown function (DUF1014), putative | transcript_product=Protein of unknown function (DUF1014), putative | lo	8	8	8	40.9	40.9	40.9	29.673	76.724	111580000	24	1	0	1	1	3	0	1	1	3	0	1	1	3	257	0	6.2	3.5	21.8	0	1336600	1889200	7400500	0.641271	0.228417	1	2.74646	6.71071	1.71535	14.5035	17.0282	17.5274	19.4973
Tb927.11.14130; Tb927.10.3840	Tb927.11.14130; Tb927.10.3840	176	Tb927.11.14130 | transcript=Tb927.11.14130:mRNA | gene=Tb927.11.14130 | organism=Trypanosoma_brucei_brucei_TREU927 | gene_product=ribosomal protein L18, putative | transcript_product=ribosomal protein L18, putative | location=Tb927_11_v5.1:3745050-	9	9	9	48.6	48.6	48.6	20.904	148.76	246300000	35	2	3	1	6	7	3	1	6	7	3	1	6	7	179	29.1	6.7	40.2	40.2	20976000	4949300	26664000	63797000	0.621087	0.239284	1	2.01717	4.0479	1.65743	21.0003	18.9169	21.3465	22.6051
Tb927.1.120; Tb09.v4.0067; Tb927.2.510; Tb927.2.560; Tb927.2.1210	Tb927.1.120	84	Tb927.1.120 | transcript=Tb927.1.120:mRNA | gene=Tb927.1.120 | organism=Trypanosoma_brucei_brucei_TREU927 | gene_product=retrotransposon hot spot protein 4 (RHS4), putative | transcript_product=retrotransposon hot spot protein 4 (RHS4), putative |	7	7	2	9.7	9.7	3.5	98.024	20.078	28943000	14	5	2	0	3	7	2	0	3	7	1	0	1	2	856	3	0	4.6	9.7	3805100	0	5159700	15050000	0.616284	0.241945	1	2.57339	5.95207	1.64377	16.3677	13.644	16.807	18.3514
Tb927.10.14710; Tb927.10.14600	Tb927.10.14710; Tb927.10.14600	139	Tb927.10.14710 | transcript=Tb927.10.14710:mRNA | gene=Tb927.10.14710 | organism=Trypanosoma_brucei_brucei_TREU927 | gene_product=40S ribosomal protein S2, putative | transcript_product=40S ribosomal protein S2, putative | location=Tb927_10_v5.1:35	17	17	17	52.6	52.6	52.6	28.642	267.35	437200000	87	2	10	9	10	14	10	9	10	14	10	9	10	14	266	32	26.3	44	49.6	64035000	43848000	69166000	117370000	0.612239	0.244209	1	0.765855	1.70038	1.6323	21.7624	21.2161	21.8737	22.6366
Tb927.3.3740	Tb927.3.3740	418	Tb927.3.3740 | transcript=Tb927.3.3740:mRNA | gene=Tb927.3.3740 | organism=Trypanosoma_brucei_brucei_TREU927 | gene_product=Zinc-finger double-stranded RNA-binding, putative | transcript_product=Zinc-finger double-stranded RNA-binding, putative | l	6	6	6	16.1	16.1	16.1	69.176	8.4371	10042000	9	1	2	1	1	5	2	1	1	5	2	1	1	5	621	6.3	1.9	1.9	14.2	1371900	644170	1657300	6369000	0.603036	0.249439	1	1.78907	3.45591	1.60631	15.3003	14.2096	15.5729	17.5151
Tb927.10.5920	Tb927.10.5920	196	Tb927.10.5920 | transcript=Tb927.10.5920:mRNA | gene=Tb927.10.5920 | organism=Trypanosoma_brucei_brucei_TREU927 | gene_product=hypothetical protein, conserved | transcript_product=hypothetical protein, conserved | location=Tb927_10_v5.1:1482999-148	2	2	2	2.5	2.5	2.5	85.743	3.0136	3772800	3	1	0	0	1	2	0	0	1	2	0	0	1	2	791	0	0	2.3	2.5	0	0	1119400	2653400	0.602835	0.249554	1	1.04949	2.06979	1.60575	14.6568	14.259	14.8848	16.13
Tb927.11.3250	Tb927.11.3250	309	Tb927.11.3250 | transcript=Tb927.11.3250:mRNA | gene=Tb927.11.3250 | organism=Trypanosoma_brucei_brucei_TREU927 | gene_product=dynein heavy chain, putative | transcript_product=dynein heavy chain, putative | location=Tb927_11_v5.1:927364-941340(+)	19	19	19	6.7	6.7	6.7	531.18	161.97	40839000	25	1	17	0	1	6	17	0	1	6	17	0	1	6	4658	6.1	0	0.4	2.2	29954000	0	1691300	8905500	0.602182	0.24993	1	-2.23587	0.212293	-1.60391	16.7541	15.3293	12.6076	15.0041
Tb927.6.3800; Tb927.6.3750; Tb927.6.3740	Tb927.6.3800; Tb927.6.3750; Tb927.6.3740	521	Tb927.6.3800 | transcript=Tb927.6.3800:mRNA | gene=Tb927.6.3800 | organism=Trypanosoma_brucei_brucei_TREU927 | gene_product=heat shock 70 kDa protein, mitochondrial precursor, putative | transcript_product=heat shock 70 kDa protein, mitochondrial p	4	4	4	8.1	8.1	8.1	71.474	7.7192	15051000	7	3	0	0	1	4	0	0	1	4	0	0	1	4	657	0	0	2	8.1	0	0	2976300	9187900	0.578648	0.263847	1	3.81384	14.0631	1.5382	15.7592	11.0746	16.4176	18.0438
Tb927.10.8780	Tb927.10.8780	221	Tb927.10.8780 | transcript=Tb927.10.8780:mRNA | gene=Tb927.10.8780 | organism=Trypanosoma_brucei_brucei_TREU927 | gene_product=AAA domain containing protein, putative | transcript_product=AAA domain containing protein, putative | location=Tb927_10_	7	7	7	4.6	4.6	4.6	244.9	29.736	19058000	10	1	7	0	1	2	7	0	1	2	7	0	1	2	2169	4.6	0	0.7	1.2	16004000	0	745100	2309000	0.565861	0.271731	1	-2.30799	0.201942	-1.50291	17.2738	14.6717	12.8489	14.4807
Tb927.9.15170; Tb927.9.15110	Tb927.9.15170; Tb927.9.15110	684	Tb927.9.15170 | transcript=Tb927.9.15170:mRNA | gene=Tb927.9.15170 | organism=Trypanosoma_brucei_brucei_TREU927 | gene_product=60S ribosomal protein L5, putative | transcript_product=60S ribosomal protein L5, putative | location=Tb927_09_v5.1:23604	2	2	2	4.5	4.5	4.5	34.636	1.5164	12051000	5	2	1	0	1	2	1	0	1	2	1	0	1	2	308	2.3	0	2.3	4.5	1712500	0	2301600	5817400	0.563155	0.273429	1	2.95403	7.74908	1.49547	17.3857	13.6685	17.8123	19.15
Tb927.10.12720	Tb927.10.12720	126	Tb927.10.12720 | transcript=Tb927.10.12720:mRNA | gene=Tb927.10.12720 | organism=Trypanosoma_brucei_brucei_TREU927 | gene_product=hypothetical protein, conserved | transcript_product=hypothetical protein, conserved | location=Tb927_10_v5.1:3088703-	1	1	1	1.4	1.4	1.4	104.64	2.4209	11286000	3	1	1	0	1	1	1	0	1	1	1	0	1	1	902	1.4	0	1.4	1.4	2864400	0	2941100	5480000	0.554814	0.278731	1	0.954871	1.93841	1.47263	15.6425	14.7067	15.6806	16.5784
Tb927.3.5050	Tb927.3.5050	430	Tb927.3.5050 | transcript=Tb927.3.5050:mRNA | gene=Tb927.3.5050 | organism=Trypanosoma_brucei_brucei_TREU927 | gene_product=60S ribosomal protein L4 | transcript_product=60S ribosomal protein L4 | location=Tb927_03_v5.1:1417717-1418841(+) | protein	16	16	16	49.7	49.7	49.7	41.856	158.2	563410000	80	1	10	4	12	13	10	4	12	13	10	4	12	13	374	42	17.6	36.6	46	84992000	24908000	93696000	162070000	0.552336	0.280326	1	1.42125	2.67817	1.46587	22.3408	20.5702	22.4815	23.272
Tb927.10.14840; Tb927.10.14830; Tb927.10.14820	Tb927.10.14840; Tb927.10.14830; Tb927.10.14820	145	Tb927.10.14840 | transcript=Tb927.10.14840:mRNA | gene=Tb927.10.14840 | organism=Trypanosoma_brucei_brucei_TREU927 | gene_product=Mitochondrial ADP/ATP carrier protein 5a | transcript_product=Mitochondrial ADP/ATP carrier protein 5a | location=Tb92	7	7	7	25.7	25.7	25.7	34.074	24.947	15556000	9	3	2	0	2	5	2	0	2	5	2	0	2	5	307	13	0	5.9	16.6	1656700	0	1749500	12149000	0.548027	0.283121	1	2.86232	7.27184	1.45413	16.5724	13.8009	16.651	19.4469
Tb927.11.9710; Tb927.10.13500	Tb927.11.9710; Tb927.10.13500	130	Tb927.11.9710 | transcript=Tb927.11.9710:mRNA | gene=Tb927.11.9710 | organism=Trypanosoma_brucei_brucei_TREU927 | gene_product=60S ribosomal protein L10a, putative | transcript_product=60S ribosomal protein L10a, putative | location=Tb927_11_v5.1:2	8	8	8	29.9	29.9	29.9	24.597	45.514	79527000	29	2	3	1	3	4	3	1	3	4	3	1	3	4	214	9.8	7.5	14.5	22	8069700	1611100	9561500	15571000	0.545898	0.284513	1	1.75873	3.38401	1.44834	19.6222	17.2977	19.8669	20.5704
Tb927.8.4140	Tb927.8.4140	616	Tb927.8.4140 | transcript=Tb927.8.4140:mRNA | gene=Tb927.8.4140 | organism=Trypanosoma_brucei_brucei_TREU927 | gene_product=Anaphase-promoting complex-associated protein AP3 | transcript_product=Anaphase-promoting complex-associated protein AP3 | l	6	6	6	14.1	14.1	14.1	45.78	8.8084	21210000	13	1	2	1	3	3	2	1	3	3	2	1	3	3	404	6.4	2	6.7	6.7	3223700	1152000	3576200	4855400	0.541634	0.28732	1	1.11263	2.16239	1.43677	17.0353	15.5507	17.185	17.6262
Tb927.11.2250	Tb927.11.2250	297	Tb927.11.2250 | transcript=Tb927.11.2250:mRNA | gene=Tb927.11.2250 | organism=Trypanosoma_brucei_brucei_TREU927 | gene_product=conserved protein, unknown function | transcript_product=conserved protein, unknown function | location=Tb927_11_v5.1:637	2	2	2	11.6	11.6	11.6	26.94	4.255	13497000	3	1	1	0	1	2	1	0	1	2	1	0	1	2	241	3.7	0	7.9	11.6	2504400	0	2770900	8221700	0.537866	0.289824	1	2.48825	5.61097	1.42657	17.6711	14.5554	17.817	19.386
Tb927.11.7685; Tb927.11.7675	Tb927.11.7685; Tb927.11.7675	357	Tb927.11.7685 | transcript=Tb927.11.7685:mRNA | gene=Tb927.11.7685 | organism=Trypanosoma_brucei_brucei_TREU927 | gene_product=ribosomal protein S10p/S20 | transcript_product=ribosomal protein S10p/S20 | location=Tb927_11_v5.1:2176931-2177284(-) |	6	6	6	37.6	37.6	37.6	13.354	181.62	192000000	27	2	1	0	2	3	1	0	2	3	1	0	2	3	117	8.5	0	21.4	21.4	6471400	0	11359000	18415000	0.534186	0.29229	1	3.86901	14.6113	1.41663	20.3037	14.8861	21.1154	21.8125
Tb927.11.9730; Tb927.10.12680	Tb927.11.9730; Tb927.10.12680	125	Tb927.11.9730 | transcript=Tb927.11.9730:mRNA | gene=Tb927.11.9730 | organism=Trypanosoma_brucei_brucei_TREU927 | gene_product=60S ribosomal protein L34, putative | transcript_product=60S ribosomal protein L34, putative | location=Tb927_11_v5.1:263	8	8	8	32.9	32.9	32.9	19.336	168.51	310780000	36	2	5	1	5	7	5	1	5	7	5	1	5	7	170	25.9	8.2	25.9	32.9	42597000	3467000	53727000	98922000	0.523517	0.29956	1	2.58469	5.99888	1.38792	23.7593	20.1403	24.0942	24.9748
Tb927.5.4260; Tb927.5.4250; Tb927.5.4240; Tb927.5.4230; Tb927.5.4220; Tb927.5.4210; Tb927.5.4200; Tb927.5.4190; Tb927.5.4180; Tb927.5.4170	Tb927.5.4260; Tb927.5.4250; Tb927.5.4240; Tb927.5.4230; Tb927.5.4220; Tb927.5.4210; Tb927.5.4200; Tb927.5.4190; Tb927.5.4180; Tb927.5.4170	503	Tb927.5.4260 | transcript=Tb927.5.4260:mRNA | gene=Tb927.5.4260 | organism=Trypanosoma_brucei_brucei_TREU927 | gene_product=histone H4, putative | transcript_product=histone H4, putative | location=Tb927_05_v5.1:1334708-1335010(-) | protein_length=	15	15	11	64	64	63	11.142	278.14	1309800000	81	10	13	7	13	14	13	7	13	14	10	5	9	10	100	64	54	57	64	270010000	49204000	292550000	559490000	0.519996	0.301998	1	1.81147	3.51001	1.37848	26.0084	23.5523	26.1241	27.0595
Tb927.10.15410	Tb927.10.15410	150	Tb927.10.15410 | transcript=Tb927.10.15410:mRNA | gene=Tb927.10.15410 | organism=Trypanosoma_brucei_brucei_TREU927 | gene_product=glycosomal malate dehydrogenase | transcript_product=glycosomal malate dehydrogenase | location=Tb927_10_v5.1:3786037-	8	8	8	40.9	40.9	40.9	33.71	14.873	28964000	10	1	3	0	2	5	3	0	2	5	3	0	2	5	323	19.5	0	8.4	20.4	5551200	0	9278300	14135000	0.5183	0.303179	1	3.7766	13.7047	1.37394	19.2344	13.7706	19.9755	20.5828
Tb927.8.3530	Tb927.8.3530	610	Tb927.8.3530 | transcript=Tb927.8.3530:mRNA | gene=Tb927.8.3530 | organism=Trypanosoma_brucei_brucei_TREU927 | gene_product=glycerol-3-phosphate dehydrogenase [NAD+], glycosomal | transcript_product=glycerol-3-phosphate dehydrogenase [NAD+], glycos	19	19	19	55.9	55.9	55.9	37.805	323.31	1227500000	103	1	12	5	12	16	12	5	12	16	12	5	12	16	354	36.2	16.4	31.1	49.2	148550000	41224000	149590000	309300000	0.517785	0.303539	1	1.45878	2.74876	1.37256	23.1463	21.297	23.1565	24.2044
Tb927.10.560	Tb927.10.560	190	Tb927.10.560 | transcript=Tb927.10.560:mRNA | gene=Tb927.10.560 | organism=Trypanosoma_brucei_brucei_TREU927 | gene_product=40S ribosomal proteins S11, putative | transcript_product=40S ribosomal proteins S11, putative | location=Tb927_10_v5.1:1471	13	13	3	61.5	61.5	14.4	20.087	173.94	438440000	67	1	6	2	9	12	6	2	9	12	1	0	3	3	174	49.4	23	56.9	61.5	59697000	6279400	75425000	109920000	0.511612	0.307885	1	2.23351	4.70277	1.35608	22.6612	19.4123	22.9986	23.5419
Tb927.11.3600; Tb927.11.3590; Tb11.v5.1059.1	Tb927.11.3600; Tb927.11.3590; Tb11.v5.1059.1	83	Tb927.11.3600 | transcript=Tb927.11.3600:mRNA | gene=Tb927.11.3600 | organism=Trypanosoma_brucei_brucei_TREU927 | gene_product=40S ribosomal protein S4, putative | transcript_product=40S ribosomal protein S4, putative | location=Tb927_11_v5.1:10633	18	18	18	57.9	57.9	57.9	30.644	111.15	363380000	75	3	7	3	9	16	7	3	9	16	7	3	9	16	273	34.1	15.4	37.7	57.1	55998000	8147200	56753000	141330000	0.507163	0.311055	1	2.06796	4.19292	1.34423	21.5689	18.7879	21.5882	22.9046
Tb927.9.14000; Tb927.8.6030	Tb927.9.14000; Tb927.8.6030	631	Tb927.9.14000 | transcript=Tb927.9.14000:mRNA | gene=Tb927.9.14000 | organism=Trypanosoma_brucei_brucei_TREU927 | gene_product=60S ribosomal protein L12, putative | transcript_product=60S ribosomal protein L12, putative | location=Tb927_09_v5.1:218	4	4	4	32.3	32.3	32.3	17.578	10.333	25280000	9	2	2	0	2	3	2	0	2	3	2	0	2	3	164	23.2	0	16.5	30.5	4477900	0	5530400	10206000	0.495994	0.319158	1	2.93479	7.64644	1.3146	19.0944	14.7178	19.3989	20.2829
Tb927.8.5260	Tb927.8.5260	627	Tb927.8.5260 | transcript=Tb927.8.5260:mRNA | gene=Tb927.8.5260 | organism=Trypanosoma_brucei_brucei_TREU927 | gene_product=60S ribosomal protein L39, putative | transcript_product=60S ribosomal protein L39, putative | location=Tb927_08_v5.1:157166	1	1	1	23.5	23.5	23.5	6.5468	1.9633	13500000	5	1	1	0	1	1	1	0	1	1	1	0	1	1	51	23.5	0	23.5	23.5	2477700	0	5778400	5243900	0.495395	0.319599	1	4.82805	28.4045	1.31302	21.2406	13.8878	22.4622	22.3222
Tb927.10.5340; Tb927.10.5330; Tb11.v5.1060.1; Tb11.v5.0243.1	Tb927.10.5340; Tb927.10.5330; Tb11.v5.1060.1; Tb11.v5.0243.1	50	Tb927.10.5340 | transcript=Tb927.10.5340:mRNA | gene=Tb927.10.5340 | organism=Trypanosoma_brucei_brucei_TREU927 | gene_product=40S ribosomal protein S18, putative | transcript_product=40S ribosomal protein S18, putative | location=Tb927_10_v5.1:133	10	10	10	58.2	58.2	58.2	17.51	323.31	423600000	41	4	7	3	4	9	7	3	4	9	7	3	4	9	153	51	25.5	31.4	58.2	66165000	27487000	62110000	125540000	0.487925	0.325143	1	1.05003	2.07058	1.2933	22.8096	21.5424	22.7184	23.7337
Tb927.11.6510; Tb927.11.6500	Tb927.11.6510; Tb927.11.6500	344	Tb927.11.6510 | transcript=Tb927.11.6510:mRNA | gene=Tb927.11.6510 | organism=Trypanosoma_brucei_brucei_TREU927 | gene_product=40S ribosomal protein S21, putative | transcript_product=40S ribosomal protein S21, putative | location=Tb927_11_v5.1:183	3	3	3	25.8	25.8	25.8	21.118	28.049	170720000	11	2	3	0	1	3	3	0	1	3	3	0	1	3	194	25.8	0	7.7	25.8	25638000	0	46610000	65499000	0.483615	0.328386	1	5.00162	32.036	1.28196	22.0268	14.2392	22.8892	23.3801
Tb927.3.1120	Tb927.3.1120	401	Tb927.3.1120 | transcript=Tb927.3.1120:mRNA | gene=Tb927.3.1120 | organism=Trypanosoma_brucei_brucei_TREU927 | gene_product=GTP-binding nuclear protein rtb2, putative | transcript_product=GTP-binding nuclear protein rtb2, putative | location=Tb927_	8	8	8	47.9	47.9	47.9	24.406	36.781	113350000	38	1	5	2	4	6	5	2	4	6	5	2	4	6	217	30	10.6	24.4	28.1	12178000	4678100	11070000	28016000	0.47945	0.33155	1	1.22236	2.33328	1.27102	19.9528	18.5725	19.8152	21.1548
Tb927.5.1110; Tb927.11.16280	Tb927.5.1110; Tb927.11.16280	289	Tb927.5.1110 | transcript=Tb927.5.1110:mRNA | gene=Tb927.5.1110 | organism=Trypanosoma_brucei_brucei_TREU927 | gene_product=60S ribosomal protein L8, putative | transcript_product=60S ribosomal protein L8, putative | location=Tb927_05_v5.1:419367-4	14	14	14	61.2	61.2	61.2	28.314	60.757	439840000	70	2	11	4	7	11	11	4	7	11	11	4	7	11	260	50.8	23.5	24.6	54.6	57398000	16029000	55253000	97873000	0.477925	0.332717	1	1.27762	2.42439	1.26702	22.0741	20.2337	22.0191	22.844
Tb927.10.13800	Tb927.10.13800	131	Tb927.10.13800 | transcript=Tb927.10.13800:mRNA | gene=Tb927.10.13800 | organism=Trypanosoma_brucei_brucei_TREU927 | gene_product=hypothetical protein, conserved | transcript_product=hypothetical protein, conserved | location=Tb927_10_v5.1:3372730-	6	6	6	23.9	23.9	23.9	46.281	31.236	63855000	17	1	3	2	3	5	3	2	3	5	3	2	3	5	431	11.6	5.1	12.5	21.1	12867000	11253000	13014000	21680000	0.476881	0.333518	1	0.481244	1.39595	1.26428	19.2248	19.0315	19.2412	19.9776
Tb927.10.11390	Tb927.10.11390	117	Tb927.10.11390 | transcript=Tb927.10.11390:mRNA | gene=Tb927.10.11390 | organism=Trypanosoma_brucei_brucei_TREU927 | gene_product=60S ribosomal protein L6, putative | transcript_product=60S ribosomal protein L6, putative | location=Tb927_10_v5.1:27	12	12	12	36.5	36.5	36.5	21.185	76.806	219290000	54	1	10	3	7	11	10	3	7	11	10	3	7	11	192	31.2	20.8	30.7	36.5	27734000	6160300	25958000	53966000	0.474314	0.335495	1	1.51773	2.86341	1.25756	21.2657	19.0951	21.1702	22.2261
Tb927.11.14000; Tb927.11.14020	Tb927.11.14000; Tb927.11.14020	268	Tb927.11.14000 | transcript=Tb927.11.14000:mRNA | gene=Tb927.11.14000 | organism=Trypanosoma_brucei_brucei_TREU927 | gene_product=nuclear RNA binding domain 1 | transcript_product=nuclear RNA binding domain 1 | location=Tb927_11_v5.1:3709461-371024	1	1	1	4.6	4.6	4.6	28.776	3.0173	41394000	6	2	1	0	1	1	1	0	1	1	1	0	1	1	262	4.6	0	4.6	4.6	6334900	0	9090300	11438000	0.4659	0.342058	1	3.57693	11.9333	1.23557	18.8945	13.114	19.4154	19.7469
Tb927.10.5480; Tb927.10.5460	Tb927.10.5480; Tb927.10.5460	188	Tb927.10.5480 | transcript=Tb927.10.5480:mRNA | gene=Tb927.10.5480 | organism=Trypanosoma_brucei_brucei_TREU927 | gene_product=60S ribosomal protein L24, putative | transcript_product=60S ribosomal protein L24, putative | location=Tb927_10_v5.1:137	6	6	6	48	48	48	14.595	36.854	105830000	26	2	3	1	3	5	3	1	3	5	3	1	3	5	125	40	5.6	32	47.2	17173000	906020	20355000	29344000	0.463923	0.343619	1	2.63134	6.19603	1.23042	21.7117	17.4672	21.957	22.4846
Tb927.7.6900	Tb927.7.6900	579	Tb927.7.6900 | transcript=Tb927.7.6900:mRNA | gene=Tb927.7.6900 | organism=Trypanosoma_brucei_brucei_TREU927 | gene_product=Sister chromatid cohesion protein 1 | transcript_product=Sister chromatid cohesion protein 1 | location=Tb927_07_v5.1:196493	3	3	3	8.9	8.9	8.9	63.033	8.6616	6519000	6	1	1	0	2	2	1	0	2	2	1	0	2	2	584	3.8	0	6.2	6.5	1784600	0	1955000	2779400	0.463032	0.344325	1	1.96617	3.90728	1.2281	16.1233	12.9618	16.2549	16.7625
Tb927.9.14370; Tb927.8.6180	Tb927.9.14370; Tb927.8.6180	635	Tb927.9.14370 | transcript=Tb927.9.14370:mRNA | gene=Tb927.9.14370 | organism=Trypanosoma_brucei_brucei_TREU927 | gene_product=60S ribosomal protein L26, putative | transcript_product=60S ribosomal protein L26, putative | location=Tb927_09_v5.1:224	3	3	3	15.4	15.4	15.4	16.454	7.7865	50288000	10	2	1	0	1	3	1	0	1	3	1	0	1	3	143	6.3	0	6.3	15.4	5987100	0	7381700	15948000	0.460373	0.346439	1	4.50346	22.6817	1.22117	20.5135	13.222	20.8155	21.9269
Tb927.11.4820; Tb927.10.14580	Tb927.11.4820; Tb927.10.14580	138	Tb927.11.4820 | transcript=Tb927.11.4820:mRNA | gene=Tb927.11.4820 | organism=Trypanosoma_brucei_brucei_TREU927 | gene_product=60S ribosomal protein L17, putative | transcript_product=60S ribosomal protein L17, putative | location=Tb927_11_v5.1:138	12	12	12	61.4	61.4	61.4	19.105	160.24	147390000	39	2	4	0	6	8	4	0	6	8	4	0	6	8	166	23.5	0	34.3	37.3	18940000	0	22841000	50529000	0.458005	0.348333	1	4.51231	22.8214	1.21502	21.5899	14.2512	21.8601	23.0056
Tb927.8.1340; Tb927.8.1330	Tb927.8.1340; Tb927.8.1330	593	Tb927.8.1340 | transcript=Tb927.8.1340:mRNA | gene=Tb927.8.1340 | organism=Trypanosoma_brucei_brucei_TREU927 | gene_product=60S ribosomal protein L7a, putative | transcript_product=60S ribosomal protein L7a, putative | location=Tb927_08_v5.1:429328	16	16	16	56.2	56.2	56.2	30.879	87.455	368140000	60	2	8	5	7	10	8	5	7	10	8	5	7	10	276	40.9	29.3	33.7	41.7	45943000	17132000	41987000	75484000	0.4575	0.348738	1	1.00479	2.00665	1.2137	22.1314	20.7083	22.0015	22.8477
Tb927.11.1450	Tb927.11.1450	273	Tb927.11.1450 | transcript=Tb927.11.1450:mRNA | gene=Tb927.11.1450 | organism=Trypanosoma_brucei_brucei_TREU927 | gene_product=2-oxoglutarate dehydrogenase E1 component, putative | transcript_product=2-oxoglutarate dehydrogenase E1 component, putat	1	1	1	1.7	1.7	1.7	113.38	4.4106	3411600	3	1	0	1	1	1	0	1	1	1	0	1	1	1	1008	0	1.7	1.7	1.7	0	879200	1020600	1511900	0.455569	0.350292	1	0.374185	1.29611	1.20869	14.44	14.1912	14.4063	14.9733
Tb927.3.3320; Tb927.3.3310	Tb927.3.3320; Tb927.3.3310	415	Tb927.3.3320 | transcript=Tb927.3.3320:mRNA | gene=Tb927.3.3320 | organism=Trypanosoma_brucei_brucei_TREU927 | gene_product=60S ribosomal protein L13, putative | transcript_product=60S ribosomal protein L13, putative | location=Tb927_03_v5.1:851801	14	14	14	49.1	49.1	49.1	25.427	201.97	528850000	78	2	12	4	10	12	12	4	10	12	12	4	10	12	218	46.3	20.2	40.4	43.6	90347000	24802000	82223000	150230000	0.45098	0.354013	1	1.23135	2.34787	1.19678	23.107	21.242	22.9711	23.8407
Tb927.5.2080	Tb927.5.2080	494	Tb927.5.2080 | transcript=Tb927.5.2080:mRNA | gene=Tb927.5.2080 | organism=Trypanosoma_brucei_brucei_TREU927 | gene_product=GMP reductase | transcript_product=GMP reductase | location=Tb927_05_v5.1:713439-714914(-) | protein_length=491 | sequence_S	1	1	1	2.2	2.2	2.2	52.238	1.4902	2855100	2	1	0	0	1	1	0	0	1	1	0	0	1	1	491	0	0	2.2	2.2	0	0	943930	1911200	0.439931	0.363136	1	1.16225	2.23807	1.16821	15.0956	13.3858	14.8941	15.9119
Tb927.9.9210; Tb927.11.3000	Tb927.9.9210; Tb927.11.3000	305	Tb927.9.9210 | transcript=Tb927.9.9210:mRNA | gene=Tb927.9.9210 | organism=Trypanosoma_brucei_brucei_TREU927 | gene_product=60S ribosomal protein L37, putative | transcript_product=60S ribosomal protein L37, putative | location=Tb927_09_v5.1:146924	4	4	4	39.3	39.3	39.3	10.1	12.662	67192000	14	2	2	0	3	3	2	0	3	3	2	0	3	3	84	20.2	0	28.6	31	11130000	0	11147000	30719000	0.436618	0.365917	1	4.86014	29.0434	1.15967	21.823	13.5696	21.8252	23.2877
Tb927.7.5180; Tb927.7.5170	Tb927.7.5180; Tb927.7.5170	568	Tb927.7.5180 | transcript=Tb927.7.5180:mRNA | gene=Tb927.7.5180 | organism=Trypanosoma_brucei_brucei_TREU927 | gene_product=60S ribosomal protein L23a, putative | transcript_product=60S ribosomal protein L23a, putative | location=Tb927_07_v5.1:1364	8	8	8	43.3	43.3	43.3	18.17	248.23	274920000	44	2	7	3	6	8	7	3	6	8	7	3	6	8	164	34.8	23.8	34.8	43.3	63177000	8622800	66033000	82933000	0.433381	0.368654	1	1.66476	3.17061	1.15133	23.3279	20.4547	23.3917	23.7205
Tb927.2.5910; Tb927.10.15120	Tb927.2.5910; Tb927.10.15120	148	Tb927.2.5910 | transcript=Tb927.2.5910:mRNA | gene=Tb927.2.5910 | organism=Trypanosoma_brucei_brucei_TREU927 | gene_product=40S ribosomal protein S13, putative | transcript_product=40S ribosomal protein S13, putative | location=Tb927_02_v5.1:107704	8	8	8	41.7	41.7	41.7	17.309	54.207	116820000	21	2	6	0	5	8	6	0	5	8	6	0	5	8	151	31.1	0	30.5	41.7	25451000	0	21963000	64689000	0.432324	0.369552	1	3.62332	12.3234	1.14861	21.4313	15.3178	21.2186	22.7771
Tb927.11.3300	Tb927.11.3300	310	Tb927.11.3300 | transcript=Tb927.11.3300:mRNA | gene=Tb927.11.3300 | organism=Trypanosoma_brucei_brucei_TREU927 | gene_product=Spindle assembly abnormal 4 | transcript_product=Spindle assembly abnormal 4 | location=Tb927_11_v5.1:962243-965041(+) |	7	7	7	10	10	10	107.86	42.163	72306000	21	1	5	2	5	7	5	2	5	7	5	2	5	7	932	8.7	3.9	8.7	10	19830000	5634300	27841000	18342000	0.431404	0.370336	1	1.09619	2.13789	1.14624	18.8837	17.0682	19.3732	18.7711
Tb927.5.1610; Tb927.4.3550	Tb927.5.1610; Tb927.4.3550	464	Tb927.5.1610 | transcript=Tb927.5.1610:mRNA | gene=Tb927.5.1610 | organism=Trypanosoma_brucei_brucei_TREU927 | gene_product=60S ribosomal protein L13a, putative | transcript_product=60S ribosomal protein L13a, putative | location=Tb927_05_v5.1:5681	13	13	13	43.2	43.2	43.2	25.711	42.744	217960000	42	2	6	3	6	7	6	3	6	7	6	3	6	7	222	30.2	12.6	27	32.4	24834000	6930200	21692000	39418000	0.428051	0.373206	1	1.15639	2.22899	1.13762	21.5658	19.7245	21.3707	22.2324
Tb927.7.5020; Tb927.7.5000; Tb11.v5.0182.1; Tb11.v5.0181.1	Tb927.7.5020; Tb927.7.5000; Tb11.v5.0182.1; Tb11.v5.0181.1	43	Tb927.7.5020 | transcript=Tb927.7.5020:mRNA | gene=Tb927.7.5020 | organism=Trypanosoma_brucei_brucei_TREU927 | gene_product=60S ribosomal protein L19, putative | transcript_product=60S ribosomal protein L19, putative | location=Tb927_07_v5.1:132559	10	10	10	30.4	30.4	30.4	29.408	79.12	248550000	50	4	7	1	7	10	7	1	7	10	7	1	7	10	260	20	4.6	20	30.4	40790000	1405100	34253000	90005000	0.427911	0.373327	1	2.87465	7.33427	1.13726	22.2817	17.4223	22.0297	23.4235
Tb927.10.6370; Tb927.10.220	Tb927.10.6370; Tb927.10.220	160	Tb927.10.6370 | transcript=Tb927.10.6370:mRNA | gene=Tb927.10.6370 | organism=Trypanosoma_brucei_brucei_TREU927 | gene_product=60S ribosomal proteins L37, putative | transcript_product=60S ribosomal proteins L37, putative | location=Tb927_10_v5.1:1	5	5	5	53.8	53.8	53.8	10.458	18.134	167280000	18	2	3	2	2	3	3	2	2	3	3	2	2	3	93	33.3	28	26.9	38.7	18130000	18686000	18968000	29999000	0.424597	0.376186	1	0.374048	1.29598	1.12876	22.527	22.5705	22.5921	23.2534
Tb927.6.4980; Tb927.11.7705; Tb11.0390; Tb11.0290	Tb927.6.4980; Tb927.11.7705; Tb11.0390; Tb11.0290	35	Tb927.6.4980 | transcript=Tb927.6.4980:mRNA | gene=Tb927.6.4980 | organism=Trypanosoma_brucei_brucei_TREU927 | gene_product=40S ribosomal protein S14 | transcript_product=40S ribosomal protein S14 | location=Tb927_06_v5.1:1370239-1370673(+) | prote	9	9	9	50.7	50.7	50.7	15.513	157.22	391080000	64	4	7	5	7	9	7	5	7	9	7	5	7	9	144	42.4	38.9	50.7	50.7	49527000	24020000	42692000	88515000	0.423177	0.377418	1	0.833738	1.7823	1.12511	22.7543	21.7104	22.5401	23.5921
Tb927.10.13110	Tb927.10.13110	129	Tb927.10.13110 | transcript=Tb927.10.13110:mRNA | gene=Tb927.10.13110 | organism=Trypanosoma_brucei_brucei_TREU927 | gene_product=Outer arm dynein light chain 7 | transcript_product=Outer arm dynein light chain 7 | location=Tb927_10_v5.1:3191431-31	2	2	2	27.1	27.1	27.1	12.826	14.58	3932800	5	1	1	0	2	2	1	0	2	2	1	0	2	2	118	13.6	0	27.1	27.1	1209700	0	1161400	1561700	0.421147	0.379187	1	1.25482	2.38638	1.11991	17.3988	15.199	17.3401	17.7673
Tb927.11.15900; Tb927.11.15880	Tb927.11.15900; Tb927.11.15880	287	Tb927.11.15900 | transcript=Tb927.11.15900:mRNA | gene=Tb927.11.15900 | organism=Trypanosoma_brucei_brucei_TREU927 | gene_product=60S ribosomal protein L27, putative | transcript_product=60S ribosomal protein L27, putative | location=Tb927_11_v5.1:	6	6	6	33.8	33.8	33.8	15.581	73.451	107950000	18	2	3	1	2	5	3	1	2	5	3	1	2	5	133	18	7.5	17.3	24.1	12135000	2879500	8844700	40139000	0.417568	0.382325	1	1.67243	3.18752	1.11074	20.7253	18.65	20.269	22.4511
Tb927.9.11410; Tb927.9.11380	Tb927.9.11410; Tb927.9.11380	662	Tb927.9.11410 | transcript=Tb927.9.11410:mRNA | gene=Tb927.9.11410 | organism=Trypanosoma_brucei_brucei_TREU927 | gene_product=60S ribosomal protein L23, putative | transcript_product=60S ribosomal protein L23, putative | location=Tb927_09_v5.1:178	9	9	9	71.9	71.9	71.9	14.962	99.398	197700000	33	2	4	1	6	7	4	1	6	7	4	1	6	7	139	36.7	12.9	50.4	57.6	32083000	0	30682000	59724000	0.414673	0.384881	1	4.11031	17.2713	1.10334	21.9353	14.5468	21.8709	22.8318
Tb927.10.11080	Tb927.10.11080	114	Tb927.10.11080 | transcript=Tb927.10.11080:mRNA | gene=Tb927.10.11080 | organism=Trypanosoma_brucei_brucei_TREU927 | gene_product=paraflagellar rod protein | transcript_product=paraflagellar rod protein | location=Tb927_10_v5.1:2705276-2708770(-) |	3	3	3	5	5	5	134.45	28.585	12058000	7	1	3	0	2	1	3	0	2	1	3	0	2	1	1164	5	0	3.4	1.5	8618100	0	2002800	1437000	0.410169	0.388894	1	-1.23724	0.424182	-1.09183	17.132	14.9168	15.0267	14.5477
Tb927.11.13360	Tb927.11.13360	262	Tb927.11.13360 | transcript=Tb927.11.13360:mRNA | gene=Tb927.11.13360 | organism=Trypanosoma_brucei_brucei_TREU927 | gene_product=AAA ATPase, putative | transcript_product=AAA ATPase, putative | location=Tb927_11_v5.1:3579657-3583502(-) | protein_l	12	12	12	14.6	14.6	14.6	141.17	29.26	32789000	16	1	5	1	4	7	5	1	4	7	5	1	4	7	1281	7.1	0.7	3.9	8.3	9534100	872930	8638800	13744000	0.409985	0.389059	1	1.91727	3.77708	1.09136	16.9948	13.5457	16.8526	17.5224
Tb09.v4.0139	Tb09.v4.0139	31	Tb09.v4.0139 | transcript=Tb09.v4.0139 | gene=Tb09.v4.0139 | organism=Trypanosoma_brucei_brucei_TREU927 | gene_product=variant surface glycoprotein (VSG, pseudogene), putative | transcript_product=variant su	1	1	1	1.3	1.3	1.3	56.351	15.951	71420000	5	1	1	0	1	1	1	0	1	1	1	0	1	1	520	1.3	0	1.3	1.3	12800000	0	15657000	13207000	0.407217	0.391546	1	2.11	4.3169	1.08429	18.9658	15.0816	19.2565	19.011
Tb927.3.930	Tb927.3.930	437	Tb927.3.930 | transcript=Tb927.3.930:mRNA | gene=Tb927.3.930 | organism=Trypanosoma_brucei_brucei_TREU927 | gene_product=dynein heavy chain, putative | transcript_product=dynein heavy chain, putative | location=Tb927_03_v5.1:217342-231261(+) | prot	15	15	15	5.1	5.1	5.1	531.41	56.995	44486000	25	1	14	0	3	9	14	0	3	9	14	0	3	9	4639	4.3	0	0.9	3	26309000	0	3557700	14619000	0.406819	0.391905	1	-1.27638	0.412829	-1.08328	16.7303	15.5486	13.8436	15.8825
Tb927.1.3180	Tb927.1.3180	92	Tb927.1.3180 | transcript=Tb927.1.3180:mRNA | gene=Tb927.1.3180 | organism=Trypanosoma_brucei_brucei_TREU927 | gene_product=40S ribosomal protein S11, putative | transcript_product=40S ribosomal protein S11, putative | location=Tb927_01_v5.1:688963	12	2	2	56.3	9.2	9.2	20.059	86.844	131470000	18	1	7	2	8	11	2	0	2	2	2	0	2	2	174	51.7	23	51.7	56.3	23721000	0	20929000	41606000	0.404	0.394457	1	3.98314	15.8141	1.07609	21.3298	13.9934	21.1491	22.1404
Tb927.9.2470; Tb927.9.2490	Tb927.9.2470; Tb927.9.2490	693	Tb927.9.2470 | transcript=Tb927.9.2470:mRNA | gene=Tb927.9.2470 | organism=Trypanosoma_brucei_brucei_TREU927 | gene_product=nucleolar protein | transcript_product=nucleolar protein | location=Tb927_09_v5.1:528721-531003(-) | protein_length=760 | se	21	21	21	33.3	33.3	33.3	86.202	306.67	186900000	45	2	12	0	13	19	12	0	13	19	12	0	13	19	760	25.4	0	22.1	32.9	51407000	0	43252000	92244000	0.401555	0.396684	1	3.92329	15.1715	1.06986	20.2936	13.0412	20.0443	21.137
Tb927.9.15360	Tb927.9.15360	687	Tb927.9.15360 | transcript=Tb927.9.15360:mRNA | gene=Tb927.9.15360 | organism=Trypanosoma_brucei_brucei_TREU927 | gene_product=40S ribosomal protein S6, putative | transcript_product=40S ribosomal protein S6, putative | location=Tb927_09_v5.1:23843	10	10	4	33.2	33.2	14.4	28.476	35.128	166590000	30	1	7	1	4	9	7	1	4	9	3	0	0	3	250	30.4	6.4	12.4	32	39897000	1691500	30648000	69916000	0.397132	0.400745	1	2.49438	5.63486	1.0586	21.9278	17.3679	21.5474	22.7372
Tb927.10.14550	Tb927.10.14550	137	Tb927.10.14550 | transcript=Tb927.10.14550:mRNA | gene=Tb927.10.14550 | organism=Trypanosoma_brucei_brucei_TREU927 | gene_product=ATP-dependent RNA helicase HEL67 | transcript_product=ATP-dependent RNA helicase HEL67 | location=Tb927_10_v5.1:356501	10	10	10	25.7	25.7	25.7	66.588	113.26	140270000	27	1	4	4	4	8	4	4	4	8	4	4	4	8	618	11	12.8	12.5	21	26126000	11422000	20488000	67128000	0.396168	0.401635	1	1.10218	2.14679	1.05615	19.391	18.1974	19.0403	20.7525
Tb927.9.1850; Tb927.9.1810	Tb927.9.1850; Tb927.9.1810	689	Tb927.9.1850 | transcript=Tb927.9.1850:mRNA | gene=Tb927.9.1850 | organism=Trypanosoma_brucei_brucei_TREU927 | gene_product=60S ribosomal protein L35, putative | transcript_product=60S ribosomal protein L35, putative | location=Tb927_09_v5.1:427609	3	3	3	25.2	25.2	25.2	15.144	39.714	111680000	7	2	2	0	2	3	2	0	2	3	2	0	2	3	127	19.7	0	19.7	25.2	29123000	0	19282000	63280000	0.38871	0.408593	1	5.28761	39.0597	1.03721	23.7957	13.745	23.2007	24.9152
Tb927.11.11830; Tb927.11.11820	Tb927.11.11830; Tb927.11.11820	255	Tb927.11.11830 | transcript=Tb927.11.11830:mRNA | gene=Tb927.11.11830 | organism=Trypanosoma_brucei_brucei_TREU927 | gene_product=40S ribosomal protein S17, putative | transcript_product=40S ribosomal protein S17, putative | location=Tb927_11_v5.1:	12	12	12	72.5	72.5	72.5	16.222	80.992	461880000	63	2	10	3	5	11	10	3	5	11	10	3	5	11	142	57	18.3	33.1	65.5	78942000	14379000	60552000	127000000	0.385965	0.411183	1	1.3801	2.60286	1.03025	23.6493	21.1925	23.2667	24.3353
Tb927.9.7180	Tb927.9.7180	713	Tb927.9.7180 | transcript=Tb927.9.7180:mRNA | gene=Tb927.9.7180 | organism=Trypanosoma_brucei_brucei_TREU927 | gene_product=adenosine monophosphate deaminase, putative | transcript_product=adenosine monophosphate deaminase, putative | location=Tb92	6	6	6	5.1	5.1	5.1	189.71	14.142	12021000	8	1	5	1	1	1	5	1	1	1	5	1	1	1	1690	5.1	0.7	0.6	0.7	9845000	740590	905100	530380	0.385775	0.411363	1	-1.96246	0.256591	-1.02976	16.9456	13.2129	13.5023	12.7313
Tb927.9.10770	Tb927.9.10770	655	Tb927.9.10770 | transcript=Tb927.9.10770:mRNA | gene=Tb927.9.10770 | organism=Trypanosoma_brucei_brucei_TREU927 | gene_product=polyadenylate-binding protein 2 | transcript_product=polyadenylate-binding protein 2 | location=Tb927_09_v5.1:1700279-170	24	24	24	47.2	47.2	47.2	62.147	258.74	677280000	107	1	20	8	17	22	20	8	17	22	20	8	17	22	555	45.6	18.2	30.1	43.6	140340000	45140000	110670000	227310000	0.384469	0.412601	1	0.994748	1.99273	1.02645	22.2064	20.5699	21.8637	22.9021
Tb927.9.3990; Tb927.9.3920	Tb927.9.3990; Tb927.9.3920	700	Tb927.9.3990 | transcript=Tb927.9.3990:mRNA | gene=Tb927.9.3990 | organism=Trypanosoma_brucei_brucei_TREU927 | gene_product=ribosomal protein S7, putative | transcript_product=ribosomal protein S7, putative | location=Tb927_09_v5.1:771263-771871(+)	9	9	9	48	48	48	23.841	200.11	126270000	28	2	7	0	3	7	7	0	3	7	7	0	3	7	202	32.2	0	12.9	35.6	31466000	0	20505000	61315000	0.383303	0.413711	1	3.88099	14.7331	1.0235	21.4478	14.0305	20.83	22.4103
Tb927.8.1110; Tb927.10.5610	Tb927.8.1110; Tb927.10.5610	191	Tb927.8.1110 | transcript=Tb927.8.1110:mRNA | gene=Tb927.8.1110 | organism=Trypanosoma_brucei_brucei_TREU927 | gene_product=40S ribosomal protein S9, putative | transcript_product=40S ribosomal protein S9, putative | location=Tb927_08_v5.1:355680-3	13	13	13	48.4	48.4	48.4	22.051	51.674	198170000	49	2	9	1	7	11	9	1	7	11	9	1	7	11	190	44.7	5.8	26.8	43.7	39764000	2993100	25523000	82625000	0.378704	0.418115	1	2.07357	4.20928	1.01185	21.7855	18.0538	21.1458	22.8406
Tb11.v5.0489.1; Tb11.v5.0800.1; Tb927.4.220; Tb11.v5.0495.1; Tb11.v5.1020.1; Tb927.2.1180; Tb927.6.5160; Tb927.1.410; Tb927.2.1100; Tb927.2.480; Tb927.2.340; Tb927.2.470	Tb11.v5.0489.1	60	Tb11.v5.0489.1 | transcript=Tb11.v5.0489.1 | gene=Tb11.v5.0489 | organism=Trypanosoma_brucei_brucei_TREU927 | gene_product=retrotransposon hot spot (RHS) protein, putative | transcript_product=retrotransposon hot spot (RHS) protein, putative | location=	5	1	0	9.9	2.8	0	65.818	4.575	3385800	1	12	1	0	3	4	0	0	1	0	0	0	0	0	573	1.9	0	7	7.2	0	0	3385800	0	0.376265	0.42047	1	1.61796	3.0694	1.00568	13.0754	14.2689	16.7842	13.7961
Tb10.v4.0052; Tb10.v4.0053; Tb927.10.10360	Tb10.v4.0052; Tb10.v4.0053; Tb927.10.10360	32	Tb10.v4.0052 | transcript=Tb10.v4.0052:mRNA | gene=Tb10.v4.0052 | organism=Trypanosoma_brucei_brucei_TREU927 | gene_product=microtubule-associated protein 2 | transcript_product=microtubule-associated protein 2 | location=Tp_ends-39g01.p1k:50-14692	17	17	6	89.5	89.5	39.8	561.21	323.31	8035300000	113	3	15	9	14	15	15	9	14	15	5	2	4	5	4880	89.1	82.3	89.1	89.5	2463100000	174900000	2166500000	2759700000	0.370202	0.426381	1	1.89743	3.72549	0.990353	22.6394	18.8235	22.4543	22.8035
Tb927.11.4400	Tb927.11.4400	320	Tb927.11.4400 | transcript=Tb927.11.4400:mRNA | gene=Tb927.11.4400 | organism=Trypanosoma_brucei_brucei_TREU927 | gene_product=hypothetical protein, conserved | transcript_product=hypothetical protein, conserved | location=Tb927_11_v5.1:1275921-127	1	1	1	2	2	2	71.914	1.5409	62885000	3	1	1	0	1	1	1	0	1	1	1	0	1	1	646	2	0	2	2	21693000	0	15631000	25561000	0.354253	0.442331	1	2.67652	6.39314	0.950124	19.2008	13.6116	18.728	19.4375
Tb927.11.3360	Tb927.11.3360	311	Tb927.11.3360 | transcript=Tb927.11.3360:mRNA | gene=Tb927.11.3360 | organism=Trypanosoma_brucei_brucei_TREU927 | gene_product=Component of motile flagella 22 | transcript_product=Component of motile flagella 22 | location=Tb927_11_v5.1:986248-9889	10	10	10	17.8	17.8	17.8	102.85	35.688	16560000	12	1	9	0	1	1	9	0	1	1	9	0	1	1	909	16.5	0	1.3	1.3	15217000	0	522130	821140	0.348417	0.448314	1	-2.20457	0.21695	-0.935435	18.3673	13.6994	13.5022	14.1554
Tb927.10.190	Tb927.10.190	157	Tb927.10.190 | transcript=Tb927.10.190:mRNA | gene=Tb927.10.190 | organism=Trypanosoma_brucei_brucei_TREU927 | gene_product=40S ribosomal protein S6, putative | transcript_product=40S ribosomal protein S6, putative | location=Tb927_10_v5.1:73558-74	7	1	1	22.8	3.6	3.6	28.44	4.9898	29586000	6	1	5	1	5	7	1	0	1	1	1	0	1	1	250	20	6.4	16	22.8	7767800	0	5000800	9781200	0.34758	0.44918	1	2.69212	6.46263	0.933328	19.7192	14.0321	19.0838	20.0517
Tb927.10.270; Tb927.9.15420	Tb927.10.270; Tb927.9.15420	164	Tb927.10.270 | transcript=Tb927.10.270:mRNA | gene=Tb927.10.270 | organism=Trypanosoma_brucei_brucei_TREU927 | gene_product=60S ribosomal protein L32, putative | transcript_product=60S ribosomal protein L32, putative | location=Tb927_10_v5.1:83385-	9	9	9	56.1	56.1	56.1	15.396	26.021	146680000	20	2	7	0	2	5	7	0	2	5	7	0	2	5	132	41.7	0	9.8	34.8	44904000	0	21644000	67807000	0.346943	0.449839	1	4.17016	18.003	0.931725	22.613	13.8144	21.5601	23.2076
Tb927.9.7620; Tb927.9.7590	Tb927.9.7620; Tb927.9.7590	714	Tb927.9.7620 | transcript=Tb927.9.7620:mRNA | gene=Tb927.9.7620 | organism=Trypanosoma_brucei_brucei_TREU927 | gene_product=60S ribosomal protein L11, putative | transcript_product=60S ribosomal protein L11, putative | location=Tb927_09_v5.1:124827	10	10	10	48.5	48.5	48.5	22.369	63.207	106050000	36	2	5	2	3	9	5	2	3	9	5	2	3	9	194	28.4	12.4	21.1	46.9	24599000	3919900	17657000	33174000	0.345872	0.45095	1	1.30138	2.46465	0.92903	21.7448	19.095	21.2664	22.1762
Tb927.9.10400	Tb927.9.10400	653	Tb927.9.10400 | transcript=Tb927.9.10400:mRNA | gene=Tb927.9.10400 | organism=Trypanosoma_brucei_brucei_TREU927 | gene_product=hypothetical protein, conserved | transcript_product=hypothetical protein, conserved | location=Tb927_09_v5.1:1628940-163	2	2	2	5.8	5.8	5.8	50.645	9.1128	12426000	7	1	1	1	1	1	1	1	1	1	1	1	1	1	468	3.2	3.2	2.6	2.6	1449000	1165300	1294600	2288500	0.343021	0.45392	1	0.405621	1.32466	0.921861	16.3791	16.0648	16.2166	17.0385
Tb927.10.1100; Tb927.6.4690	Tb927.10.1100; Tb927.6.4690	113	Tb927.10.1100 | transcript=Tb927.10.1100:mRNA | gene=Tb927.10.1100 | organism=Trypanosoma_brucei_brucei_TREU927 | gene_product=60S ribosomal protein L9, putative | transcript_product=60S ribosomal protein L9, putative | location=Tb927_10_v5.1:29172	14	14	14	72	72	72	21.857	230.7	283290000	56	2	9	2	9	13	9	2	9	13	9	2	9	13	189	54	21.7	63.5	61.9	67862000	5581200	40599000	111770000	0.342788	0.454164	1	1.79135	3.46138	0.921276	22.5567	18.9527	21.8155	23.2765
Tb927.7.6360	Tb927.7.6360	576	Tb927.7.6360 | transcript=Tb927.7.6360:mRNA | gene=Tb927.7.6360 | organism=Trypanosoma_brucei_brucei_TREU927 | gene_product=histone H2A variant Z | transcript_product=histone H2A variant Z | location=Tb927_07_v5.1:1729044-1729583(-) | protein_lengt	4	4	4	24	24	24	18.667	129.54	106160000	15	1	3	0	3	3	3	0	3	3	3	0	3	3	179	24	0	24	19	39868000	0	23215000	41059000	0.339463	0.457654	1	4.06633	16.7528	0.912918	22.6638	13.7934	21.8836	22.7062
Tb927.11.6200; Tb927.11.6180	Tb927.11.6200; Tb927.11.6180	338	Tb927.11.6200 | transcript=Tb927.11.6200:mRNA | gene=Tb927.11.6200 | organism=Trypanosoma_brucei_brucei_TREU927 | gene_product=60S ribosomal protein L28, putative | transcript_product=60S ribosomal protein L28, putative | location=Tb927_11_v5.1:174	8	8	8	52.1	52.1	52.1	16.861	323.31	294450000	45	2	7	2	4	7	7	2	4	7	7	2	4	7	146	46.6	15.8	35.6	51.4	81237000	4462600	62212000	82796000	0.338388	0.458788	1	1.91436	3.76946	0.910218	23.6906	19.5045	23.3058	23.7181
Tb927.10.2110; Tb927.10.2100; Tb927.10.2090; Tb11.v5.1046.1	Tb927.10.2110; Tb927.10.2100; Tb927.10.2090; Tb11.v5.1046.1	81	Tb927.10.2110 | transcript=Tb927.10.2110:mRNA | gene=Tb927.10.2110 | organism=Trypanosoma_brucei_brucei_TREU927 | gene_product=elongation factor 1-alpha | transcript_product=elongation factor 1-alpha | location=Tb927_10_v5.1:549417-550766(+) | prot	19	19	19	41.4	41.4	41.4	49.105	323.31	1814400000	155	4	12	13	14	18	12	13	14	18	12	13	14	18	449	34.5	34.5	36.1	40.3	204800000	144800000	170750000	365680000	0.330309	0.467402	1	0.537152	1.45111	0.889928	23.0247	22.5245	22.7624	23.8611
Tb927.4.1100; Tb927.11.680; Tb11.0880	Tb927.4.1100; Tb927.11.680; Tb11.0880	37	Tb927.4.1100 | transcript=Tb927.4.1100:mRNA | gene=Tb927.4.1100 | organism=Trypanosoma_brucei_brucei_TREU927 | gene_product=ribosomal protein L21E (60S), putative | transcript_product=ribosomal protein L21E (60S), putative | location=Tb927_04_v5.1:	9	9	9	56	56	56	18.015	118.6	243480000	36	3	7	1	2	5	7	1	2	5	7	1	2	5	159	46.5	6.9	11.9	20.1	38954000	7203300	26942000	51993000	0.329407	0.468375	1	1.15984	2.23433	0.887662	22.2153	19.7802	21.6834	22.6318
Tb927.3.4360; Tb927.11.6140	Tb927.3.4360; Tb927.11.6140	337	Tb927.3.4360 | transcript=Tb927.3.4360:mRNA | gene=Tb927.3.4360 | organism=Trypanosoma_brucei_brucei_TREU927 | gene_product=40S ribosomal protein S15A, putative | transcript_product=40S ribosomal protein S15A, putative | location=Tb927_03_v5.1:1223	5	5	5	40	40	40	14.645	24.496	80089000	10	2	4	0	2	3	4	0	2	3	4	0	2	3	130	40	0	21.5	21.5	21868000	0	12318000	22420000	0.328338	0.469528	1	3.24344	9.47051	0.88498	21.5749	14.296	20.7469	21.6109
Tb11.v5.0827.1; Tb927.2.4230	Tb11.v5.0827.1; Tb927.2.4230	76	Tb11.v5.0827.1 | transcript=Tb11.v5.0827.1 | gene=Tb11.v5.0827 | organism=Trypanosoma_brucei_brucei_TREU927 | gene_product=NUP-1 protein, putative | transcript_product=NUP-1 protein, putative | location=Tb927_11_bin_v5.1:4319434-4321464(-) | protein_len	9	9	9	35.1	35.1	35.1	75.242	248.99	133370000	25	2	6	0	5	8	6	0	5	8	6	0	5	8	676	30.2	0	35.1	35.1	47139000	0	27536000	50730000	0.327968	0.469928	1	2.78879	6.91049	0.884052	20.2809	14.0337	19.5053	20.3869
Tb927.7.1750; Tb927.7.1740; Tb927.7.1730	Tb927.7.1750; Tb927.7.1740; Tb927.7.1730	538	Tb927.7.1750 | transcript=Tb927.7.1750:mRNA | gene=Tb927.7.1750 | organism=Trypanosoma_brucei_brucei_TREU927 | gene_product=60S ribosomal protein L7, putative | transcript_product=60S ribosomal protein L7, putative | location=Tb927_07_v5.1:431071-4	11	11	11	50.8	50.8	50.8	27.713	58.301	208660000	39	3	5	3	6	8	5	3	6	8	5	3	6	8	242	32.6	16.5	33.9	38	30514000	4828700	20871000	39527000	0.3275	0.470436	1	1.24257	2.36619	0.882876	21.278	18.6182	20.73	21.6514
Tb927.8.3060	Tb927.8.3060	608	Tb927.8.3060 | transcript=Tb927.8.3060:mRNA | gene=Tb927.8.3060 | organism=Trypanosoma_brucei_brucei_TREU927 | gene_product=metallo-peptidase, Clan MF, Family M17 | transcript_product=metallo-peptidase, Clan MF, Family M17 | location=Tb927_08_v5.1:	13	13	13	27	27	27	71.314	41.033	72377000	28	1	9	0	5	8	9	0	5	8	9	0	5	8	671	22.8	0	9.4	15.5	25704000	0	13999000	32675000	0.327015	0.470961	1	2.47765	5.56988	0.88166	19.4862	14.0004	18.6095	19.8324
Tb927.3.3270	Tb927.3.3270	413	Tb927.3.3270 | transcript=Tb927.3.3270:mRNA | gene=Tb927.3.3270 | organism=Trypanosoma_brucei_brucei_TREU927 | gene_product=ATP-dependent 6-phosphofructokinase, glycosomal | transcript_product=ATP-dependent 6-phosphofructokinase, glycosomal | locat	23	23	23	46.6	46.6	46.6	53.517	139.96	268050000	82	1	19	0	14	20	19	0	14	20	19	0	14	20	487	42.1	0	36.1	43.7	79678000	0	42360000	83915000	0.326857	0.471132	1	3.34389	10.1534	0.881264	21.6038	14.0793	20.6923	21.6786
Tb927.10.5880	Tb927.10.5880	195	Tb927.10.5880 | transcript=Tb927.10.5880:mRNA | gene=Tb927.10.5880 | organism=Trypanosoma_brucei_brucei_TREU927 | gene_product=Proteophosphoglycan, putative | transcript_product=Proteophosphoglycan, putative | location=Tb927_10_v5.1:1472277-1474157	4	4	4	12.3	12.3	12.3	66.774	11.155	12615000	7	1	4	0	1	1	4	0	1	1	4	0	1	1	626	12.3	0	3.5	3.5	8852800	0	1545900	2215900	0.326408	0.47162	1	-1.07016	0.476265	-0.880135	17.8298	15.4541	15.312	15.8315
Tb927.3.1370; Tb927.10.2840	Tb927.3.1370; Tb927.10.2840	166	Tb927.3.1370 | transcript=Tb927.3.1370:mRNA | gene=Tb927.3.1370 | organism=Trypanosoma_brucei_brucei_TREU927 | gene_product=40S ribosomal protein S25, putative | transcript_product=40S ribosomal protein S25, putative | location=Tb927_03_v5.1:343637	9	9	9	54	54	54	12.56	70.758	330780000	39	2	4	2	4	6	4	2	4	6	4	2	4	6	113	34.5	17.7	31.9	44.2	48473000	12885000	30517000	94908000	0.326153	0.471896	1	1.10667	2.15348	0.879497	23.2087	21.2973	22.5412	24.1781
Tb927.11.2410	Tb927.11.2410	299	Tb927.11.2410 | transcript=Tb927.11.2410:mRNA | gene=Tb927.11.2410 | organism=Trypanosoma_brucei_brucei_TREU927 | gene_product=Flabarin, putative | transcript_product=Flabarin, putative | location=Tb927_11_v5.1:701086-701754(-) | protein_length=222	6	6	6	53.6	53.6	53.6	24.58	98.661	61956000	12	1	5	0	1	6	5	0	1	6	5	0	1	6	222	43.7	0	4.1	53.6	19614000	0	6527100	35814000	0.319705	0.478955	1	3.48018	11.1593	0.863319	21.2254	13.5463	19.638	22.094
Tb927.2.4330; Tb11.v5.0777.1	Tb927.2.4330	383	Tb927.2.4330 | transcript=Tb927.2.4330:mRNA | gene=Tb927.2.4330 | organism=Trypanosoma_brucei_brucei_TREU927 | gene_product=paraflagellar rod protein 5, putative | transcript_product=paraflagellar rod protein 5, putative | location=Tb927_02_v5.1:76	9	9	9	15.6	15.6	15.6	87.142	31.74	162460000	16	2	9	0	1	5	9	0	1	5	9	0	1	5	762	15.6	0	1.4	9.8	65283000	0	37616000	59561000	0.317632	0.481247	1	2.90364	7.48311	0.85812	20.4683	13.7334	19.673	20.336
Tb927.9.12510	Tb927.9.12510	671	Tb927.9.12510 | transcript=Tb927.9.12510:mRNA | gene=Tb927.9.12510 | organism=Trypanosoma_brucei_brucei_TREU927 | gene_product=ATP-dependent DEAD/H RNA helicase, putative | transcript_product=ATP-dependent DEAD/H RNA helicase, putative | location=T	3	3	3	6	6	6	82.74	9.1874	8234200	6	1	0	0	1	3	0	0	1	3	0	0	1	3	735	0	0	2	6	0	0	1114400	4178800	0.31664	0.482348	1	0.818275	1.7633	0.855631	14.7742	14.6246	14.5643	16.4711
Tb927.10.3940; Tb11.v5.0501.1; Tb927.10.3930	Tb927.10.3940; Tb11.v5.0501.1; Tb927.10.3930	61	Tb927.10.3940 | transcript=Tb927.10.3940:mRNA | gene=Tb927.10.3940 | organism=Trypanosoma_brucei_brucei_TREU927 | gene_product=40S ribosomal protein S3A, putative | transcript_product=40S ribosomal protein S3A, putative | location=Tb927_10_v5.1:104	20	20	20	60.5	60.5	60.5	29.422	211.79	391800000	68	3	13	1	9	14	13	1	9	14	13	1	9	14	256	49.6	2.7	40.6	53.1	91039000	4145200	57780000	94809000	0.316411	0.482602	1	1.9298	3.81002	0.855058	22.5331	18.0761	21.8772	22.5916
Tb927.11.8200	Tb927.11.8200	361	Tb927.11.8200 | transcript=Tb927.11.8200:mRNA | gene=Tb927.11.8200 | organism=Trypanosoma_brucei_brucei_TREU927 | gene_product=ribosomal protein S26, putative | transcript_product=ribosomal protein S26, putative | location=Tb927_11_v5.1:2305896-230	8	8	8	56.8	56.8	56.8	12.806	136.2	419910000	47	1	8	3	6	5	8	3	6	5	8	3	6	5	111	56.8	41.4	54.1	54.1	90331000	17069000	66363000	99728000	0.314128	0.485146	1	1.0509	2.07182	0.849333	24.4287	22.0249	23.9839	24.5715
Tb927.11.9720	Tb927.11.9720	369	Tb927.11.9720 | transcript=Tb927.11.9720:mRNA | gene=Tb927.11.9720 | organism=Trypanosoma_brucei_brucei_TREU927 | gene_product=40S ribosomal protein S27, putative | transcript_product=40S ribosomal protein S27, putative | location=Tb927_11_v5.1:263	5	5	1	61.6	61.6	11.6	9.6302	57.458	196020000	26	1	3	1	2	4	3	1	2	4	1	1	1	1	86	43	11.6	26.7	45.3	16963000	14884000	15064000	30000000	0.306513	0.493727	1	0.419932	1.33786	0.830241	21.694	21.5054	21.5227	22.5165
Tb927.10.7340; Tb927.10.7330	Tb927.10.7340; Tb927.10.7330	207	Tb927.10.7340 | transcript=Tb927.10.7340:mRNA | gene=Tb927.10.7340 | organism=Trypanosoma_brucei_brucei_TREU927 | gene_product=40S ribosomal protein S24E, putative | transcript_product=40S ribosomal protein S24E, putative | location=Tb927_10_v5.1:1	7	7	7	43.1	43.1	43.1	15.683	153.79	145320000	32	2	5	1	3	5	5	1	3	5	5	1	3	5	137	38	11.7	24.8	29.2	39966000	1986300	20387000	52616000	0.305255	0.49516	1	1.87811	3.67592	0.827087	23.6673	19.3367	22.6962	24.0641
Tb927.10.5030; Tb927.7.3680	Tb927.10.5030; Tb927.7.3680	185	Tb927.10.5030 | transcript=Tb927.10.5030:mRNA | gene=Tb927.10.5030 | organism=Trypanosoma_brucei_brucei_TREU927 | gene_product=ubiquitin/ribosomal protein S27a, putative | transcript_product=ubiquitin/ribosomal protein S27a, putative | location=Tb9	3	3	3	27.2	27.2	27.2	16.705	17.674	56121000	11	2	2	1	3	2	2	1	3	2	2	1	3	2	151	21.9	13.2	27.2	13.9	14513000	2383900	12466000	11733000	0.293508	0.508736	1	1.0399	2.05609	0.79764	21.2059	18.5999	20.9866	20.8991
Tb927.10.8940	Tb927.10.8940	224	Tb927.10.8940 | transcript=Tb927.10.8940:mRNA | gene=Tb927.10.8940 | organism=Trypanosoma_brucei_brucei_TREU927 | gene_product=flagellum targeting protein kharon1, putative | transcript_product=flagellum targeting protein kharon1, putative | locati	42	42	42	85.4	85.4	85.4	45.398	323.31	1716600000	172	1	39	4	25	31	39	4	25	31	39	4	25	31	411	82.2	15.8	76.6	80.8	723370000	6814400	324600000	650770000	0.293146	0.50916	1	2.71065	6.54618	0.796733	25.1082	18.3782	23.9522	24.9556
Tb927.1.2550; Tb927.1.2530; Tb927.1.2510; Tb927.1.2490; Tb927.1.2470; Tb927.1.2450; Tb927.1.2430; Tb927.10.15350	Tb927.1.2550; Tb927.1.2530; Tb927.1.2510; Tb927.1.2490; Tb927.1.2470; Tb927.1.2450; Tb927.1.2430	89	Tb927.1.2550 | transcript=Tb927.1.2550:mRNA | gene=Tb927.1.2550 | organism=Trypanosoma_brucei_brucei_TREU927 | gene_product=histone H3, putative | transcript_product=histone H3, putative | location=Tb927_01_v5.1:602011-602412(+) | protein_length=13	16	16	16	82	82	82	14.75	323.31	1619400000	71	8	15	3	10	11	15	3	10	11	15	3	10	11	133	82	19.5	72.2	52.6	554230000	35603000	313280000	590890000	0.29228	0.510176	1	1.61488	3.06286	0.794562	26.2386	22.2782	25.4155	26.331
Tb927.7.3410	Tb927.7.3410	557	Tb927.7.3410 | transcript=Tb927.7.3410:mRNA | gene=Tb927.7.3410 | organism=Trypanosoma_brucei_brucei_TREU927 | gene_product=centrin-4 | transcript_product=centrin-4 | location=Tb927_07_v5.1:886750-887199(-) | protein_length=149 | sequence_SO=chromo	1	1	1	11.4	11.4	11.4	16.552	19.294	9270400	4	1	1	0	1	1	1	0	1	1	1	0	1	1	149	11.4	0	11.4	11.4	3725700	0	1916100	3009800	0.28965	0.513275	1	2.41902	5.34809	0.787967	18.8291	12.7238	17.8697	18.5212
Tb927.11.11290	Tb927.11.11290	249	Tb927.11.11290 | transcript=Tb927.11.11290:mRNA | gene=Tb927.11.11290 | organism=Trypanosoma_brucei_brucei_TREU927 | gene_product=heat shock protein 70, putative | transcript_product=heat shock protein 70, putative | location=Tb927_11_v5.1:3020888-	7	2	2	11.2	3.4	3.4	73.63	3.5098	10701000	5	1	3	0	3	4	1	0	2	2	1	0	2	2	676	7.2	0	6.8	8.9	3804300	0	2521000	4375800	0.288781	0.514303	1	0.961998	1.94801	0.785789	16.8148	14.4991	16.2212	17.0167
Tb927.11.11010	Tb927.11.11010	244	Tb927.11.11010 | transcript=Tb927.11.11010:mRNA | gene=Tb927.11.11010 | organism=Trypanosoma_brucei_brucei_TREU927 | gene_product=hypothetical protein, conserved | transcript_product=hypothetical protein, conserved | location=Tb927_11_v5.1:2943505-	30	30	30	63.5	63.5	63.5	41.653	307.91	683050000	85	1	27	1	14	23	27	1	14	23	27	1	14	23	348	63.5	4.3	38.8	58.9	345050000	0	101700000	235210000	0.287121	0.516273	1	4.26404	19.2134	0.781626	24.1143	13.2708	22.3518	23.5614
Tb927.7.2640	Tb927.7.2640	543	Tb927.7.2640 | transcript=Tb927.7.2640:mRNA | gene=Tb927.7.2640 | organism=Trypanosoma_brucei_brucei_TREU927 | gene_product=cytoskeleton associated protein, putative | transcript_product=cytoskeleton associated protein, putative | location=Tb927_07	31	31	23	45.3	45.3	38.2	50.853	323.31	1115600000	93	1	30	2	18	22	30	2	18	22	22	1	13	16	453	45.3	5.1	40.4	39.3	529900000	1583500	213900000	370250000	0.285999	0.517608	1	3.28025	9.71526	0.778813	24.2807	15.8943	22.972	23.7635
Tb927.10.14630; Tb927.10.14750	Tb927.10.14630; Tb927.10.14750	141	Tb927.10.14630 | transcript=Tb927.10.14630:mRNA | gene=Tb927.10.14630 | organism=Trypanosoma_brucei_brucei_TREU927 | gene_product=fibrillarin, putative | transcript_product=fibrillarin, putative | location=Tb927_10_v5.1:3582443-3583129(-) | protein	2	2	2	12.7	12.7	12.7	24.997	23.454	4991300	4	2	1	0	1	2	1	0	1	2	1	0	1	2	228	7	0	7	12.7	1471300	0	574410	2945700	0.282274	0.522066	1	1.71758	3.28885	0.769471	17.0292	13.2387	15.6723	18.0307
Tb927.7.2940; Tb927.7.2930; Tb927.7.2920; Tb927.7.2910; Tb927.7.2900; Tb927.7.2890; Tb927.7.2880; Tb927.7.2870; Tb927.7.2860; Tb927.7.2850; Tb927.7.2840; Tb927.7.2830; Tb927.7.2820	Tb927.7.2940; Tb927.7.2930; Tb927.7.2920; Tb927.7.2910; Tb927.7.2900; Tb927.7.2890; Tb927.7.2880; Tb927.7.2870; Tb927.7.2860; Tb927.7.2850; Tb927.7.2840; Tb927.7.2830; Tb927.7.2820	551	Tb927.7.2940 | transcript=Tb927.7.2940:mRNA | gene=Tb927.7.2940 | organism=Trypanosoma_brucei_brucei_TREU927 | gene_product=histone H2A, putative | transcript_product=histone H2A, putative | location=Tb927_07_v5.1:739893-740297(+) | protein_length=	13	13	13	41.8	41.8	41.8	14.212	323.31	4311100000	86	13	11	6	9	11	11	6	9	11	11	6	9	11	134	41	26.1	41	41	1441900000	110190000	745170000	1660700000	0.279348	0.525596	1	1.48078	2.79099	0.76213	27.8403	24.1304	26.8881	28.0442
Tb927.10.6510; Tb927.10.6400	Tb927.10.6510; Tb927.10.6400	200	Tb927.10.6510 | transcript=Tb927.10.6510:mRNA | gene=Tb927.10.6510 | organism=Trypanosoma_brucei_brucei_TREU927 | gene_product=chaperonin HSP60, mitochondrial precursor | transcript_product=chaperonin HSP60, mitochondrial precursor | location=Tb927	6	6	6	15.8	15.8	15.8	59.503	62.319	12158000	10	2	1	1	1	5	1	1	1	5	1	1	1	5	562	2.1	3	2.8	12.8	993990	794150	666960	7481600	0.278295	0.526872	1	1.33011	2.51421	0.759488	14.8785	14.5546	14.3029	17.7905
Tb927.11.7350	Tb927.11.7350	352	Tb927.11.7350 | transcript=Tb927.11.7350:mRNA | gene=Tb927.11.7350 | organism=Trypanosoma_brucei_brucei_TREU927 | gene_product=Histone H2B variant V | transcript_product=Histone H2B variant V | location=Tb927_11_v5.1:2071522-2071953(+) | protein_le	5	5	5	42.7	42.7	42.7	15.786	13.337	85705000	14	1	5	0	2	3	5	0	2	3	5	0	2	3	143	42.7	0	15.4	23.8	45676000	0	15562000	24466000	0.277458	0.527888	1	3.86331	14.5536	0.757389	22.445	12.2642	20.8915	21.5443
Tb927.11.10910; Tb927.11.10790	Tb927.11.10910; Tb927.11.10790	241	Tb927.11.10910 | transcript=Tb927.11.10910:mRNA | gene=Tb927.11.10910 | organism=Trypanosoma_brucei_brucei_TREU927 | gene_product=40S ribosomal protein SA, putative | transcript_product=40S ribosomal protein SA, putative | location=Tb927_11_v5.1:29	9	9	9	54.5	54.5	54.5	27.609	195.21	151970000	26	2	7	1	5	7	7	1	5	7	7	1	5	7	244	47.5	7.8	29.1	37.3	39694000	8647700	23659000	52190000	0.272732	0.533664	1	0.923391	1.89657	0.745528	21.4351	19.2365	20.6885	21.8299
Tb927.9.8420; Tb927.9.8070	Tb927.9.8420; Tb927.9.8070	715	Tb927.9.8420 | transcript=Tb927.9.8420:mRNA | gene=Tb927.9.8420 | organism=Trypanosoma_brucei_brucei_TREU927 | gene_product=QM-like protein | transcript_product=QM-like protein | location=Tb927_09_v5.1:1373453-1374094(-) | protein_length=213 | sequ	14	14	14	57.3	57.3	57.3	24.736	264.51	325320000	51	2	9	4	6	11	9	4	6	11	9	4	6	11	213	45.1	21.1	27.7	50.7	62453000	11168000	32525000	96324000	0.269796	0.537284	1	1.08364	2.11938	0.738155	22.4368	19.9535	21.4956	23.062
Tb927.7.1050; Tb927.7.1040	Tb927.7.1050; Tb927.7.1040	534	Tb927.7.1050 | transcript=Tb927.7.1050:mRNA | gene=Tb927.7.1050 | organism=Trypanosoma_brucei_brucei_TREU927 | gene_product=40S ribosomal protein S16, putative | transcript_product=40S ribosomal protein S16, putative | location=Tb927_07_v5.1:268952	6	6	6	47.7	47.7	47.7	16.998	60.02	98271000	25	2	5	1	3	6	5	1	3	6	5	1	3	6	149	38.9	9.4	19.5	47.7	30993000	1240900	11822000	41080000	0.268509	0.538879	1	1.82928	3.55359	0.734922	21.8855	17.2429	20.495	22.2919
Tb927.7.2650	Tb927.7.2650	544	Tb927.7.2650 | transcript=Tb927.7.2650:mRNA | gene=Tb927.7.2650 | organism=Trypanosoma_brucei_brucei_TREU927 | gene_product=hypothetical protein, conserved | transcript_product=hypothetical protein, conserved | location=Tb927_07_v5.1:680735-682348(	10	2	2	13	3.9	3.9	62.171	2.9069	5079200	3	1	9	1	5	7	1	0	0	1	1	0	0	1	537	11.7	2.6	7.4	9.3	1966100	0	0	1186400	0.265339	0.542827	1	-0.940521	0.521045	-0.726958	16.0489	14.4433	13.291	15.3202
Tb927.3.5010	Tb927.3.5010	427	Tb927.3.5010 | transcript=Tb927.3.5010:mRNA | gene=Tb927.3.5010 | organism=Trypanosoma_brucei_brucei_TREU927 | gene_product=hypothetical protein, conserved | transcript_product=hypothetical protein, conserved | location=Tb927_03_v5.1:1406292-140687	6	6	6	22.3	22.3	22.3	23.423	14.647	75175000	15	1	5	0	4	6	5	0	4	6	5	0	4	6	193	22.3	0	12.4	22.3	34325000	0	10998000	29852000	0.264616	0.543731	1	2.62288	6.15976	0.725143	21.7108	14.6216	20.0688	21.5094
Tb927.7.3550	Tb927.7.3550	559	Tb927.7.3550 | transcript=Tb927.7.3550:mRNA | gene=Tb927.7.3550 | organism=Trypanosoma_brucei_brucei_TREU927 | gene_product=cytoskeleton associated protein, putative | transcript_product=cytoskeleton associated protein, putative | location=Tb927_07	23	23	23	28.4	28.4	28.4	138.16	323.31	387090000	61	1	21	1	9	17	21	1	9	17	21	1	9	17	1241	26.8	1.5	10.8	20.4	184580000	1361600	67101000	129430000	0.260669	0.548695	1	2.55545	5.87851	0.715221	21.7592	14.6765	20.2994	21.2472
Tb927.6.2900	Tb927.6.2900	514	Tb927.6.2900 | transcript=Tb927.6.2900:mRNA | gene=Tb927.6.2900 | organism=Trypanosoma_brucei_brucei_TREU927 | gene_product=dendritic cell-derived IFNG-induced protein | transcript_product=dendritic cell-derived IFNG-induced protein | location=Tb92	1	1	1	2.9	2.9	2.9	81.733	1.8983	1652900000	5	1	1	0	1	1	1	0	1	1	1	0	1	1	735	2.9	0	2.9	2.9	961730000	0	275640000	415550000	0.259002	0.550805	1	3.72807	13.2513	0.71103	24.3492	13.8796	22.5463	23.1386
Tb927.7.2570; Tb11.v5.0611.1	Tb927.7.2570; Tb11.v5.0611.1	67	Tb927.7.2570 | transcript=Tb927.7.2570:mRNA | gene=Tb927.7.2570 | organism=Trypanosoma_brucei_brucei_TREU927 | gene_product=mitochondrial RNA binding protein 1 | transcript_product=mitochondrial RNA binding protein 1 | location=Tb927_07_v5.1:659885	1	1	1	3.6	3.6	3.6	52.545	7.2356	1129500	2	2	0	0	1	1	0	0	1	1	0	0	1	1	473	0	0	3.6	3.6	0	0	467000	662460	0.258687	0.551205	1	0.602927	1.5188	0.710236	14.6491	13.0279	14.1892	14.6937
Tb927.3.4330; Tb927.3.4320; Tb927.3.4310; Tb927.3.4300; Tb927.3.4290; Tb11.v5.1055.1	Tb927.3.4330; Tb927.3.4320; Tb927.3.4310; Tb927.3.4300; Tb927.3.4290; Tb11.v5.1055.1	82	Tb927.3.4330 | transcript=Tb927.3.4330:mRNA | gene=Tb927.3.4330 | organism=Trypanosoma_brucei_brucei_TREU927 | gene_product=Paraflagellar rod protein 1-5 | transcript_product=Paraflagellar rod protein 1-5 | location=Tb927_03_v5.1:1217516-1219285(-)	58	57	57	79.5	78.3	78.3	68.682	323.31	5775200000	235	6	48	14	42	46	47	13	41	45	47	13	41	45	589	71.1	26.5	66.4	74.7	2242800000	175660000	1398700000	1667800000	0.253282	0.558108	1	1.28293	2.43332	0.696635	26.2553	22.5809	25.5741	25.8279
Tb927.2.6090; Tb927.11.3230	Tb927.2.6090; Tb927.11.3230	307	Tb927.2.6090 | transcript=Tb927.2.6090:mRNA | gene=Tb927.2.6090 | organism=Trypanosoma_brucei_brucei_TREU927 | gene_product=60S ribosomal protein L44 | transcript_product=60S ribosomal protein L44 | location=Tb927_02_v5.1:1099561-1099881(+) | prote	6	6	6	60.4	60.4	60.4	12.454	50.355	70875000	16	2	6	0	1	2	6	0	1	2	6	0	1	2	106	60.4	0	8.5	22.6	24911000	0	4924400	21969000	0.250763	0.561355	1	3.10136	8.58228	0.690292	22.2484	13.5255	19.9096	22.067
Tb927.11.14880	Tb927.11.14880	274	Tb927.11.14880 | transcript=Tb927.11.14880:mRNA | gene=Tb927.11.14880 | organism=Trypanosoma_brucei_brucei_TREU927 | gene_product=Paraflagellar Rod Proteome Component 9, putative | transcript_product=Paraflagellar Rod Proteome Component 9, putative	12	12	12	31.8	31.8	31.8	41.086	323.31	375390000	46	1	10	2	9	9	10	2	9	9	10	2	9	9	371	31.5	7.8	28.3	29.9	169400000	3964200	74272000	122200000	0.249614	0.562841	1	1.87821	3.67619	0.687399	23.6354	18.2182	22.4459	23.1642
Tb927.6.1470	Tb927.6.1470	507	Tb927.6.1470 | transcript=Tb927.6.1470:mRNA | gene=Tb927.6.1470 | organism=Trypanosoma_brucei_brucei_TREU927 | gene_product=hypothetical protein, conserved | transcript_product=hypothetical protein, conserved | location=Tb927_06_v5.1:517183-517854(	9	9	9	28.7	28.7	28.7	27.521	34.927	95413000	20	1	7	0	2	9	7	0	2	9	7	0	2	9	223	27.8	0	12.1	28.7	51441000	0	9685400	34286000	0.249126	0.563474	1	3.45547	10.9698	0.686169	22.8091	12.9038	20.4	22.2238
Tb927.11.14100	Tb927.11.14100	269	Tb927.11.14100 | transcript=Tb927.11.14100:mRNA | gene=Tb927.11.14100 | organism=Trypanosoma_brucei_brucei_TREU927 | gene_product=Double RNA-binding domain containing protein 4 | transcript_product=Double RNA-binding domain containing protein 4 | l	6	6	6	21.8	21.8	21.8	54.707	118.14	109000000	34	1	3	3	3	5	3	3	3	5	3	3	3	5	505	8.5	10.1	10.1	13.9	13422000	6883500	8656900	24880000	0.245726	0.567903	1	0.610592	1.52689	0.677599	19.2857	18.3224	18.6531	20.1762
Tb927.11.11330; Tb11.v5.1035.1; Tb927.7.710; Tb11.v5.1034.1	Tb927.11.11330; Tb11.v5.1035.1	78	Tb927.11.11330 | transcript=Tb927.11.11330:mRNA | gene=Tb927.11.11330 | organism=Trypanosoma_brucei_brucei_TREU927 | gene_product=heat shock protein 70 | transcript_product=heat shock protein 70 | location=Tb927_11_v5.1:3028681-3030666(+) | protein	13	13	8	27.5	27.5	19.5	71.408	45.217	93911000	34	4	6	0	4	6	6	0	4	6	4	0	3	4	661	14.5	0	11.8	15.6	16210000	0	8247200	12181000	0.240839	0.57433	1	1.41562	2.66775	0.66527	18.8629	14.6445	17.888	18.4506
Tb927.11.4900	Tb927.11.4900	324	Tb927.11.4900 | transcript=Tb927.11.4900:mRNA | gene=Tb927.11.4900 | organism=Trypanosoma_brucei_brucei_TREU927 | gene_product=WD40/YVTN repeat-like-containing protein | transcript_product=WD40/YVTN repeat-like-containing protein | location=Tb927_1	10	10	10	20	20	20	61.857	18.988	40524000	14	1	4	2	1	5	4	2	1	5	4	2	1	5	560	6.4	3.4	1.8	12	9420800	5056400	0	15563000	0.240089	0.575323	1	-2.36761	0.193766	-0.663377	18.2132	17.3155	11.8561	18.9374
Tb927.9.5320	Tb927.9.5320	704	Tb927.9.5320 | transcript=Tb927.9.5320:mRNA | gene=Tb927.9.5320 | organism=Trypanosoma_brucei_brucei_TREU927 | gene_product=nucleolar RNA binding protein, putative | transcript_product=nucleolar RNA binding protein, putative | location=Tb927_09_v5.	11	11	11	40.5	40.5	40.5	46.864	74.87	62981000	21	1	10	0	4	6	10	0	4	6	10	0	4	6	427	37.7	0	18.3	27.6	33333000	0	8718100	20930000	0.239561	0.576022	1	2.65105	6.28124	0.662045	20.5981	12.6898	18.6633	19.9267
Tb927.9.11490; Tb927.9.11470	Tb927.9.11490; Tb927.9.11470	663	Tb927.9.11490 | transcript=Tb927.9.11490:mRNA | gene=Tb927.9.11490 | organism=Trypanosoma_brucei_brucei_TREU927 | gene_product=60S ribosomal protein L29 | transcript_product=60S ribosomal protein L29 | location=Tb927_09_v5.1:1792681-1793118(+) | pr	9	9	9	47.6	47.6	47.6	16.266	69.981	216200000	37	2	8	3	5	7	8	3	5	7	8	3	5	7	145	46.9	26.2	39.3	41.4	52051000	5291900	21174000	68777000	0.233813	0.583696	1	1.20123	2.29936	0.647521	22.6334	19.3354	21.3358	23.0354
Tb927.9.13990	Tb927.9.13990	681	Tb927.9.13990 | transcript=Tb927.9.13990:mRNA | gene=Tb927.9.13990 | organism=Trypanosoma_brucei_brucei_TREU927 | gene_product=RNA-binding protein, putative | transcript_product=RNA-binding protein, putative | location=Tb927_09_v5.1:2186949-2187866	4	4	4	22	22	22	34.618	43.346	58469000	18	1	3	1	3	4	3	1	3	4	3	1	3	4	305	19.3	4.3	19.3	22	17356000	2570200	10679000	14496000	0.232121	0.585975	1	0.897483	1.86281	0.643241	19.879	17.1235	19.1783	19.6192
Tb927.9.5150	Tb927.9.5150	703	Tb927.9.5150 | transcript=Tb927.9.5150:mRNA | gene=Tb927.9.5150 | organism=Trypanosoma_brucei_brucei_TREU927 | gene_product=ribosomal protein S6, putative | transcript_product=ribosomal protein S6, putative | location=Tb927_09_v5.1:912912-913292(+)	3	3	3	42.9	42.9	42.9	13.572	72.455	23575000	10	1	3	0	2	1	3	0	2	1	3	0	2	1	126	42.9	0	33.3	14.3	11270000	0	5756300	5888900	0.232005	0.586131	1	1.71588	3.28497	0.642948	20.6186	15.2812	19.6494	19.6822
Tb927.11.2610	Tb927.11.2610	302	Tb927.11.2610 | transcript=Tb927.11.2610:mRNA | gene=Tb927.11.2610 | organism=Trypanosoma_brucei_brucei_TREU927 | gene_product=hypothetical protein, conserved | transcript_product=hypothetical protein, conserved | location=Tb927_11_v5.1:766672-7680	24	24	24	56.2	56.2	56.2	50.887	323.31	1708200000	92	1	21	3	14	19	21	3	14	19	21	3	14	19	461	56.2	13.4	40.8	50.5	837720000	15741000	319960000	524800000	0.228967	0.590246	1	1.83532	3.56849	0.635258	24.9415	19.2076	23.5529	24.2668
Tb927.10.15250; Tb11.v5.0996.1; Tb11.1220	Tb927.10.15250; Tb11.v5.0996.1; Tb11.1220	38	Tb927.10.15250 | transcript=Tb927.10.15250:mRNA | gene=Tb927.10.15250 | organism=Trypanosoma_brucei_brucei_TREU927 | gene_product=paraflagellar rod component, putative | transcript_product=paraflagellar rod component, putative | location=Tb927_10_v	28	28	28	50.7	50.7	50.7	57.813	290.53	460320000	66	3	27	0	8	17	27	0	8	17	27	0	8	17	485	48.2	0	22.7	40.4	278730000	0	44564000	134470000	0.226487	0.593627	1	3.23827	9.4366	0.628975	23.4104	13.2375	20.7656	22.3589
Tb927.8.6660	Tb927.8.6660	639	Tb927.8.6660 | transcript=Tb927.8.6660:mRNA | gene=Tb927.8.6660 | organism=Trypanosoma_brucei_brucei_TREU927 | gene_product=paraflagellar rod component, putative | transcript_product=paraflagellar rod component, putative | location=Tb927_08_v5.1:19	44	44	44	69.2	69.2	69.2	69.055	323.31	1161500000	141	1	44	2	25	33	44	2	25	33	44	2	25	33	607	69.2	6.9	36.2	58.2	676080000	1951100	168830000	312350000	0.225804	0.59456	1	2.66055	6.32275	0.627245	24.3784	15.9417	22.3768	23.2644
Tb927.10.14610	Tb927.10.14610	140	Tb927.10.14610 | transcript=Tb927.10.14610:mRNA | gene=Tb927.10.14610 | organism=Trypanosoma_brucei_brucei_TREU927 | gene_product=leucine-rich repeat protein (LRRP), putative | transcript_product=leucine-rich repeat protein (LRRP), putative | locat	8	8	8	9.9	9.9	9.9	121.48	41.631	24031000	12	1	8	0	1	3	8	0	1	3	8	0	1	3	1103	9.9	0	1.4	3.2	19793000	0	313080	3925100	0.223248	0.598071	1	-1.83404	0.280478	-0.620763	18.8122	14.1638	12.8299	16.478
Tb927.4.4040	Tb927.4.4040	468	Tb927.4.4040 | transcript=Tb927.4.4040:mRNA | gene=Tb927.4.4040 | organism=Trypanosoma_brucei_brucei_TREU927 | gene_product=hypothetical protein, conserved | transcript_product=hypothetical protein, conserved | location=Tb927_04_v5.1:1073890-107466	6	6	6	26.6	26.6	26.6	30.274	23.263	57240000	11	1	5	0	2	4	5	0	2	4	5	0	2	4	259	21.6	0	10	20.8	33705000	0	8771700	14763000	0.22094	0.601256	1	2.52881	5.77097	0.614908	21.306	13.1154	19.364	20.115
Tb927.10.1090; Tb927.10.1080	Tb927.10.1090; Tb927.10.1080	112	Tb927.10.1090 | transcript=Tb927.10.1090:mRNA | gene=Tb927.10.1090 | organism=Trypanosoma_brucei_brucei_TREU927 | gene_product=40S ribosomal protein S23, putative | transcript_product=40S ribosomal protein S23, putative | location=Tb927_10_v5.1:290	10	10	10	62.9	62.9	62.9	15.928	41.96	234890000	40	2	9	2	4	7	9	2	4	7	9	2	4	7	143	58.7	18.2	32.9	54.5	82874000	2500400	25175000	76619000	0.217947	0.605415	1	1.60928	3.051	0.607305	23.497	18.4464	21.7781	23.3839
Tb927.9.5860; Tb927.9.5770	Tb927.9.5860; Tb927.9.5770	706	Tb927.9.5860 | transcript=Tb927.9.5860:mRNA | gene=Tb927.9.5860 | organism=Trypanosoma_brucei_brucei_TREU927 | gene_product=tryparedoxin peroxidase | transcript_product=tryparedoxin peroxidase | location=Tb927_09_v5.1:989953-990552(+) | protein_len	10	10	10	71.9	71.9	71.9	22.424	167.24	318210000	53	2	7	6	8	8	7	6	8	8	7	6	8	8	199	62.8	47.2	48.2	51.8	72694000	38784000	54563000	80413000	0.214687	0.609976	1	0.319022	1.24748	0.599016	22.4149	21.5085	22.001	22.5605
Tb927.1.2260	Tb927.1.2260	87	Tb927.1.2260 | transcript=Tb927.1.2260:mRNA | gene=Tb927.1.2260 | organism=Trypanosoma_brucei_brucei_TREU927 | gene_product=small myristoylated protein 1-2 | transcript_product=small myristoylated protein 1-2 | location=Tb927_01_v5.1:564977-565366(	6	6	4	54.3	54.3	34.1	14.03	147.13	110950000	14	1	5	0	2	4	5	0	2	4	4	0	1	2	129	45.7	0	21.7	30.2	49163000	0	5316200	56475000	0.214408	0.610369	1	2.7325	6.64607	0.598305	22.3812	13.9071	19.172	22.5812
Tb927.2.2160	Tb927.2.2160	375	Tb927.2.2160 | transcript=Tb927.2.2160:mRNA | gene=Tb927.2.2160 | organism=Trypanosoma_brucei_brucei_TREU927 | gene_product=paraflagellar rod component, putative | transcript_product=paraflagellar rod component, putative | location=Tb927_02_v5.1:41	18	18	18	66.3	66.3	66.3	37.731	323.31	217190000	43	1	17	0	8	8	17	0	8	8	17	0	8	8	329	66.3	0	29.5	27.4	135210000	0	34913000	44391000	0.213703	0.61136	1	2.63672	6.21916	0.596512	22.8407	14.007	20.8873	21.2339
Tb927.10.10590; Tb927.10.10580; Tb927.10.10570; Tb927.10.10560; Tb927.10.10550; Tb927.10.10540; Tb927.10.10530; Tb927.10.10520; Tb927.10.10510; Tb927.10.10500; Tb927.10.10490; Tb927.10.10480; Tb927.10.10470; Tb927.10.10460; Tb927.10.10445	Tb927.10.10590; Tb927.10.10580; Tb927.10.10570; Tb927.10.10560; Tb927.10.10550; Tb927.10.10540; Tb927.10.10530; Tb927.10.10520; Tb927.10.10510; Tb927.10.10500; Tb927.10.10490; Tb927.10.10480; Tb927.10.10470; Tb927.10.10460; Tb927.10.10445	110	Tb927.10.10590 | transcript=Tb927.10.10590:mRNA | gene=Tb927.10.10590 | organism=Trypanosoma_brucei_brucei_TREU927 | gene_product=histone H2B, putative | transcript_product=histone H2B, putative | location=Tb927_10_v5.1:2584907-2585245(-) | protein	17	17	17	79.5	79.5	79.5	12.569	323.31	5369200000	89	15	17	6	12	15	17	6	12	15	17	6	12	15	112	79.5	52.7	78.6	78.6	2242200000	86269000	769150000	1857200000	0.212109	0.613607	1	1.4423	2.71754	0.592455	28.0622	23.3624	26.5187	27.7905
Tb927.8.3750	Tb927.8.3750	612	Tb927.8.3750 | transcript=Tb927.8.3750:mRNA | gene=Tb927.8.3750 | organism=Trypanosoma_brucei_brucei_TREU927 | gene_product=nucleolar protein 56 | transcript_product=nucleolar protein 56 | location=Tb927_08_v5.1:1120813-1122264(-) | protein_length=	9	9	9	31.3	31.3	31.3	54.358	70.365	57805000	17	1	8	0	3	5	8	0	3	5	8	0	3	5	483	28.6	0	12.2	15.9	27945000	0	8188400	21671000	0.21197	0.613804	1	1.67967	3.20355	0.5921	19.9812	14.4841	18.2102	19.6144
Tb927.6.4140	Tb927.6.4140	525	Tb927.6.4140 | transcript=Tb927.6.4140:mRNA | gene=Tb927.6.4140 | organism=Trypanosoma_brucei_brucei_TREU927 | gene_product=paraflagellar rod component, putative | transcript_product=paraflagellar rod component, putative | location=Tb927_06_v5.1:11	10	10	10	98.3	98.3	98.3	13.009	215.68	563340000	41	1	10	1	7	6	10	1	7	6	10	1	7	6	115	98.3	11.3	63.5	53.9	319600000	2113600	86970000	154180000	0.211767	0.614092	1	2.15554	4.45536	0.591582	25.6667	18.4263	23.7891	24.6151
Tb927.10.10140	Tb927.10.10140	107	Tb927.10.10140 | transcript=Tb927.10.10140:mRNA | gene=Tb927.10.10140 | organism=Trypanosoma_brucei_brucei_TREU927 | gene_product=paraflagellar rod component, putative | transcript_product=paraflagellar rod component, putative | location=Tb927_10_v	17	17	17	47.1	47.1	47.1	37.014	323.31	381540000	49	1	16	1	9	11	16	1	9	11	16	1	9	11	331	43.8	5.7	37.8	45	228220000	877410	56717000	93972000	0.210228	0.616271	1	2.36711	5.15906	0.587662	23.9585	15.9355	21.9499	22.6784
Tb927.3.1010	Tb927.3.1010	398	Tb927.3.1010 | transcript=Tb927.3.1010:mRNA | gene=Tb927.3.1010 | organism=Trypanosoma_brucei_brucei_TREU927 | gene_product=hypothetical protein, conserved | transcript_product=hypothetical protein, conserved | location=Tb927_03_v5.1:246909-248711(	24	24	24	51.3	51.3	51.3	64.339	201.96	291190000	52	1	23	0	7	16	23	0	7	16	23	0	7	16	600	51.3	0	14.5	32.8	182530000	0	31221000	76643000	0.209383	0.617472	1	2.74698	6.71313	0.585509	22.2736	12.9803	19.7261	21.0217
Tb927.1.3310	Tb927.1.3310	94	Tb927.1.3310 | transcript=Tb927.1.3310:mRNA | gene=Tb927.1.3310 | organism=Trypanosoma_brucei_brucei_TREU927 | gene_product=hypothetical protein, conserved | transcript_product=hypothetical protein, conserved | location=Tb927_01_v5.1:722222-722980(	4	4	4	27.4	27.4	27.4	28.503	15.135	31695000	11	1	4	0	1	3	4	0	1	3	4	0	1	3	252	27.4	0	15.5	23.4	15766000	0	3396300	12533000	0.205943	0.622381	1	1.91975	3.78357	0.576734	20.2098	13.8245	17.9951	19.8787
Tb927.9.12240; Tb927.9.12200	Tb927.9.12240; Tb927.9.12200	669	Tb927.9.12240 | transcript=Tb927.9.12240:mRNA | gene=Tb927.9.12240 | organism=Trypanosoma_brucei_brucei_TREU927 | gene_product=60S ribosomal subunit protein L31, putative | transcript_product=60S ribosomal subunit protein L31, putative | location=T	10	10	10	42	42	42	21.692	170.19	204150000	32	2	9	2	4	6	9	2	4	6	9	2	4	6	188	41.5	12.8	29.3	40.4	75224000	3699300	27561000	60243000	0.204846	0.623956	1	1.28844	2.44263	0.573931	23.5797	19.2339	22.1312	23.2593
Tb927.11.1100; Tb927.11.1110.1; Tb11.v5.1038.1; Tb927.11.1090	Tb927.11.1100; Tb927.11.1110.1; Tb11.v5.1038.1; Tb927.11.1090	79	Tb927.11.1100 | transcript=Tb927.11.1100:mRNA | gene=Tb927.11.1100 | organism=Trypanosoma_brucei_brucei_TREU927 | gene_product=cysteine peptidase, Clan CA, family C2, putative | transcript_product=cysteine peptidase, Clan CA, family C2, putative |	3	3	3	23	23	23	125.63	15.907	25600000	8	4	2	0	3	1	2	0	3	1	2	0	3	1	1096	12.3	0	23	4.7	11164000	0	3609200	10827000	0.202389	0.627497	1	1.28629	2.439	0.567653	17.7119	13.4661	16.0828	17.6677
Tb927.6.4670	Tb927.6.4670	529	Tb927.6.4670 | transcript=Tb927.6.4670:mRNA | gene=Tb927.6.4670 | organism=Trypanosoma_brucei_brucei_TREU927 | gene_product=MORN repeat-containing protein 1 | transcript_product=MORN repeat-containing protein 1 | location=Tb927_06_v5.1:1303156-1304	2	2	2	9.5	9.5	9.5	40.686	25.531	26486000	6	1	2	0	2	1	2	0	2	1	2	0	2	1	358	9.5	0	9.5	4.2	13227000	0	8613600	4645500	0.202023	0.628026	1	1.44325	2.71933	0.566717	19.072	14.0571	18.4532	17.5624
Tb11.v5.0807.1; Tb927.9.13510	Tb11.v5.0807.1; Tb927.9.13510	75	Tb11.v5.0807.1 | transcript=Tb11.v5.0807.1 | gene=Tb11.v5.0807 | organism=Trypanosoma_brucei_brucei_TREU927 | gene_product=ribonuclease, putative | transcript_product=ribonuclease, putative | location=Tb927_11_bin_v5.1:4205482-4207182(+) | protein_lengt	2	2	2	3.4	3.4	3.4	64.261	6.0987	3359900	2	2	1	0	1	1	1	0	1	1	1	0	1	1	566	1.6	0	1.8	1.6	861200	0	450700	2048000	0.201215	0.629194	1	0.684569	1.60722	0.564653	14.9611	13.9076	14.027	16.2109
Tb927.1.3910	Tb927.1.3910	97	Tb927.1.3910 | transcript=Tb927.1.3910:mRNA | gene=Tb927.1.3910 | organism=Trypanosoma_brucei_brucei_TREU927 | gene_product=Anaphase-promoting complex subunit CDC23 | transcript_product=Anaphase-promoting complex subunit CDC23 | location=Tb927_01_v	4	4	4	6.5	6.5	6.5	99.782	18.595	17396000	10	1	2	0	1	3	2	0	1	3	2	0	1	3	907	3	0	1.7	4.6	4023400	0	2008600	7527300	0.199404	0.631824	1	0.667931	1.58879	0.560018	16.3854	14.9511	15.3832	17.2892
Tb927.11.15100	Tb927.11.15100	278	Tb927.11.15100 | transcript=Tb927.11.15100:mRNA | gene=Tb927.11.15100 | organism=Trypanosoma_brucei_brucei_TREU927 | gene_product=Tb5.20 | transcript_product=Tb5.20 | location=Tb927_11_v5.1:4013255-4016506(-) | protein_length=1083 | sequence_SO=chr	24	24	24	21.6	21.6	21.6	118.44	300.61	522870000	70	1	24	1	14	16	24	1	14	16	24	1	14	16	1083	21.6	0.8	14.8	16.9	321540000	1124100	65248000	134960000	0.19937	0.631874	1	2.3033	4.93586	0.55993	23.3062	15.1462	21.0053	22.0537
Tb927.8.6240	Tb927.8.6240	637	Tb927.8.6240 | transcript=Tb927.8.6240:mRNA | gene=Tb927.8.6240 | organism=Trypanosoma_brucei_brucei_TREU927 | gene_product=STOP axonemal protein | transcript_product=STOP axonemal protein | location=Tb927_08_v5.1:1814348-1815148(+) | protein_lengt	15	15	15	53.4	53.4	53.4	30.042	196.09	415080000	42	1	15	1	7	10	15	1	7	10	15	1	7	10	266	53.4	6.4	32	38	239990000	1798800	62545000	107670000	0.198611	0.632978	1	1.98175	3.94971	0.557988	23.7509	16.6911	21.8109	22.5946
Tb927.3.2310	Tb927.3.2310	406	Tb927.3.2310 | transcript=Tb927.3.2310:mRNA | gene=Tb927.3.2310 | organism=Trypanosoma_brucei_brucei_TREU927 | gene_product=parkin coregulated gene protein | transcript_product=parkin coregulated gene protein | location=Tb927_03_v5.1:593475-594377(	11	11	11	51	51	51	33.785	121.91	58927000	17	1	9	0	4	6	9	0	4	6	9	0	4	6	300	48	0	13.7	28	35119000	0	8297400	15511000	0.194105	0.639581	1	1.99773	3.99372	0.546436	20.9783	13.7223	18.8968	19.7993
Tb927.11.12210	Tb927.11.12210	257	Tb927.11.12210 | transcript=Tb927.11.12210:mRNA | gene=Tb927.11.12210 | organism=Trypanosoma_brucei_brucei_TREU927 | gene_product=Domain of unknown function (DUF4586), putative | transcript_product=Domain of unknown function (DUF4586), putative | l	10	10	10	52.2	52.2	52.2	32.43	82.511	112960000	23	1	9	0	3	8	9	0	3	8	9	0	3	8	291	48.1	0	15.5	37.8	66455000	0	6544300	39959000	0.191799	0.642986	1	2.60994	6.1048	0.540515	21.8984	12.6006	18.5543	21.1645
Tb927.3.4760	Tb927.3.4760	424	Tb927.3.4760 | transcript=Tb927.3.4760:mRNA | gene=Tb927.3.4760 | organism=Trypanosoma_brucei_brucei_TREU927 | gene_product=dynamin-1-like protein | transcript_product=dynamin-1-like protein | location=Tb927_03_v5.1:1344510-1346492(-) | protein_len	17	2	2	30.6	4.2	4.2	73.148	2.426	17434000	6	1	2	2	2	7	2	1	0	1	2	1	0	1	660	4.2	4.2	4.8	13	4061600	2743000	0	5576700	0.190919	0.644289	1	-0.891615	0.53901	-0.538256	16.5274	15.9611	13.7205	16.9847
Tb927.11.3240	Tb927.11.3240	308	Tb927.11.3240 | transcript=Tb927.11.3240:mRNA | gene=Tb927.11.3240 | organism=Trypanosoma_brucei_brucei_TREU927 | gene_product=T-complex protein 1, zeta subunit, putative | transcript_product=T-complex protein 1, zeta subunit, putative | location=T	10	10	10	24.8	24.8	24.8	59.579	23.535	42244000	20	1	2	2	1	7	2	2	1	7	2	2	1	7	544	8.6	6.2	3.7	16.2	2349300	3087300	1597900	15586000	0.190726	0.644575	1	0.889871	1.85301	0.537759	16.2569	16.651	15.7008	18.9868
Tb927.11.11210	Tb927.11.11210	246	Tb927.11.11210 | transcript=Tb927.11.11210:mRNA | gene=Tb927.11.11210 | organism=Trypanosoma_brucei_brucei_TREU927 | gene_product=paraflagellar rod component, putative | transcript_product=paraflagellar rod component, putative | location=Tb927_11_v	18	18	18	61.1	61.1	61.1	41.94	175.32	156530000	32	1	18	0	5	5	18	0	5	5	18	0	5	5	360	61.1	0	21.9	20.6	110040000	0	15613000	30876000	0.190387	0.645078	1	2.72352	6.60483	0.536888	23.013	12.9153	20.1958	21.1796
Tb927.11.3710	Tb927.11.3710	315	Tb927.11.3710 | transcript=Tb927.11.3710:mRNA | gene=Tb927.11.3710 | organism=Trypanosoma_brucei_brucei_TREU927 | gene_product=hypothetical protein, conserved | transcript_product=hypothetical protein, conserved | location=Tb927_11_v5.1:1090522-109	23	23	23	58.3	58.3	58.3	61.184	166.25	199270000	42	1	23	0	6	10	23	0	6	10	23	0	6	10	515	58.3	0	16.9	30.1	132800000	0	24844000	41631000	0.187402	0.649528	1	2.31751	4.98472	0.529208	22.1267	13.4	19.7084	20.4532
Tb927.11.12150	Tb927.11.12150	256	Tb927.11.12150 | transcript=Tb927.11.12150:mRNA | gene=Tb927.11.12150 | organism=Trypanosoma_brucei_brucei_TREU927 | gene_product=flagellar pocket cytoskeletal protein bilbo1 | transcript_product=flagellar pocket cytoskeletal protein bilbo1 | locat	14	14	14	32	32	32	67.325	175.84	110900000	32	1	13	0	10	6	13	0	10	6	13	0	10	6	587	32	0	23.5	14.5	66963000	0	25532000	18400000	0.187157	0.649894	1	1.83366	3.56441	0.528578	20.8676	13.9456	19.4765	19.0039
Tb927.7.4460	Tb927.7.4460	567	Tb927.7.4460 | transcript=Tb927.7.4460:mRNA | gene=Tb927.7.4460 | organism=Trypanosoma_brucei_brucei_TREU927 | gene_product=von Willebrand factor type A domain containing protein, putative | transcript_product=von Willebrand factor type A domain co	9	9	9	14.1	14.1	14.1	91.199	30.671	34277000	10	1	9	0	1	1	9	0	1	1	9	0	1	1	842	14.1	0	1.9	2	29863000	0	872920	3540700	0.18693	0.650234	1	-1.47723	0.359179	-0.527994	19.7875	14.5692	14.6911	16.7112
Tb927.8.3790	Tb927.8.3790	613	Tb927.8.3790 | transcript=Tb927.8.3790:mRNA | gene=Tb927.8.3790 | organism=Trypanosoma_brucei_brucei_TREU927 | gene_product=paraflagellar rod component, putative | transcript_product=paraflagellar rod component, putative | location=Tb927_08_v5.1:11	9	9	9	63.7	63.7	63.7	25.119	46.266	75391000	21	1	8	0	4	6	8	0	4	6	8	0	4	6	223	60.1	0	30.9	39.9	51256000	0	9075200	15060000	0.183813	0.654919	1	2.32586	5.01363	0.519958	22.2893	13.3729	19.7916	20.5223
Tb927.9.3010	Tb927.9.3010	697	Tb927.9.3010 | transcript=Tb927.9.3010:mRNA | gene=Tb927.9.3010 | organism=Trypanosoma_brucei_brucei_TREU927 | gene_product=hypothetical protein, conserved | transcript_product=hypothetical protein, conserved | location=Tb927_09_v5.1:671977-672207(	3	3	3	28.9	28.9	28.9	8.3381	9.4589	20210000	6	1	3	0	1	2	3	0	1	2	3	0	1	2	76	28.9	0	14.5	28.9	12156000	0	2396600	5657600	0.1832	0.655843	1	1.91089	3.76042	0.518377	21.2132	13.9455	18.8706	20.1098
Tb927.8.4580	Tb927.8.4580	619	Tb927.8.4580 | transcript=Tb927.8.4580:mRNA | gene=Tb927.8.4580 | organism=Trypanosoma_brucei_brucei_TREU927 | gene_product=Basal body protein | transcript_product=Basal body protein | location=Tb927_08_v5.1:1357391-1358842(-) | protein_length=483	25	25	25	53.8	53.8	53.8	58.084	323.31	206350000	48	1	23	0	6	14	23	0	6	14	23	0	6	14	483	50.5	0	15.3	31.9	132690000	0	18193000	55459000	0.18236	0.657113	1	2.27957	4.85535	0.51621	22.0293	13.345	19.1627	20.7707
Tb927.7.2370; Tb927.7.2340	Tb927.7.2370; Tb927.7.2340	542	Tb927.7.2370 | transcript=Tb927.7.2370:mRNA | gene=Tb927.7.2370 | organism=Trypanosoma_brucei_brucei_TREU927 | gene_product=40S ribosomal protein S15, putative | transcript_product=40S ribosomal protein S15, putative | location=Tb927_07_v5.1:611294	9	9	9	48.7	48.7	48.7	17.474	126.02	308950000	44	2	6	4	3	7	6	4	3	7	6	4	3	7	152	46.1	39.5	34.9	44.7	69285000	36862000	8908600	86178000	0.180056	0.660608	1	-0.866988	0.54829	-0.510259	23.461	22.5507	20.5018	23.7759
Tb927.11.8030	Tb927.11.8030	358	Tb927.11.8030 | transcript=Tb927.11.8030:mRNA | gene=Tb927.11.8030 | organism=Trypanosoma_brucei_brucei_TREU927 | gene_product=hypothetical protein, conserved | transcript_product=hypothetical protein, conserved | location=Tb927_11_v5.1:2257349-225	8	8	8	27.3	27.3	27.3	46.474	47.02	28645000	8	1	7	0	1	1	7	0	1	1	7	0	1	1	417	23.3	0	4.1	2.6	26195000	0	1106300	1344000	0.17987	0.660891	1	-1.49527	0.354715	-0.509779	20.1834	14.3238	15.618	15.8986
Tb927.7.3560	Tb927.7.3560	560	Tb927.7.3560 | transcript=Tb927.7.3560:mRNA | gene=Tb927.7.3560 | organism=Trypanosoma_brucei_brucei_TREU927 | gene_product=Component of motile flagella 7 | transcript_product=Component of motile flagella 7 | location=Tb927_07_v5.1:921562-926844(-)	8	8	8	7.3	7.3	7.3	199.21	51.233	34296000	9	1	7	0	1	3	7	0	1	3	7	0	1	3	1760	6.4	0	0.9	2.7	23600000	0	907960	9788100	0.177327	0.664773	1	-1.2335	0.425284	-0.5032	17.8629	14.3602	13.1629	16.5932
Tb927.5.3970	Tb927.5.3970	501	Tb927.5.3970 | transcript=Tb927.5.3970:mRNA | gene=Tb927.5.3970 | organism=Trypanosoma_brucei_brucei_TREU927 | gene_product=adenylate kinase, putative | transcript_product=adenylate kinase, putative | location=Tb927_05_v5.1:1284634-1285416(+) | pro	11	11	11	44.2	44.2	44.2	29.872	56.566	32188000	14	1	11	0	1	1	11	0	1	1	11	0	1	1	260	44.2	0	5.4	3.8	30148000	0	714310	1324800	0.168553	0.678339	1	-1.61722	0.325963	-0.48043	21.1451	14.472	15.7458	16.6369
Tb927.9.13070	Tb927.9.13070	675	Tb927.9.13070 | transcript=Tb927.9.13070:mRNA | gene=Tb927.9.13070 | organism=Trypanosoma_brucei_brucei_TREU927 | gene_product=Heat shock factor binding 1 domain-containing protein | transcript_product=Heat shock factor binding 1 domain-containing	1	1	1	19.5	19.5	19.5	9.2493	3.3968	11332000	5	1	1	0	1	1	1	0	1	1	1	0	1	1	82	19.5	0	19.5	19.5	3299300	0	1009100	1682200	0.167969	0.679252	1	1.25587	2.38812	0.478909	19.3318	14.1391	17.6227	18.36
Tb927.9.12170	Tb927.9.12170	668	Tb927.9.12170 | transcript=Tb927.9.12170:mRNA | gene=Tb927.9.12170 | organism=Trypanosoma_brucei_brucei_TREU927 | gene_product=leucine-rich repeat protein (LRRP), putative | transcript_product=leucine-rich repeat protein (LRRP), putative | location	3	3	3	22	22	22	32.359	9.6727	18391000	6	1	3	0	1	2	3	0	1	2	3	0	1	2	291	22	0	4.1	9.6	8439200	0	2597600	7354100	0.167844	0.679447	1	0.999409	1.99918	0.478585	19.1018	15.2045	17.4018	18.9032
Tb11.0840; Tb927.11.720	Tb11.0840; Tb927.11.720	36	Tb11.0840 | transcript=Tb11.0840:mRNA | gene=Tb11.0840 | organism=Trypanosoma_brucei_brucei_TREU927 | gene_product=hypothetical protein | transcript_product=hypothetical protein | location=tryp_XI-147f01.q1ca:1458-2243(+) | protein_length=261 | seq	6	6	6	34.9	34.9	34.9	29.807	11.854	48761000	11	2	6	0	1	1	6	0	1	1	6	0	1	1	261	34.9	0	4.2	4.2	30372000	0	6447000	11943000	0.167759	0.67958	1	1.66878	3.17946	0.478363	21.3968	14.4766	19.1608	20.0502
Tb927.10.6490	Tb927.10.6490	201	Tb927.10.6490 | transcript=Tb927.10.6490:mRNA | gene=Tb927.10.6490 | organism=Trypanosoma_brucei_brucei_TREU927 | gene_product=KIAA1430 homologue, putative | transcript_product=KIAA1430 homologue, putative | location=Tb927_10_v5.1:1644685-1645170(+	3	3	3	21.1	21.1	21.1	19.53	7.6717	35045000	9	1	3	1	3	2	3	1	3	2	3	1	3	2	161	21.1	6.8	21.1	14.3	20742000	320030	6408100	7574300	0.167059	0.680677	1	1.43511	2.70403	0.476539	21.1361	15.1179	19.4415	19.6828
Tb927.11.2540	Tb927.11.2540	300	Tb927.11.2540 | transcript=Tb927.11.2540:mRNA | gene=Tb927.11.2540 | organism=Trypanosoma_brucei_brucei_TREU927 | gene_product=hypothetical protein, conserved | transcript_product=hypothetical protein, conserved | location=Tb927_11_v5.1:748768-7496	16	16	16	62.6	62.6	62.6	33.848	188	164420000	38	1	15	0	7	8	15	0	7	8	15	0	7	8	297	62.6	0	20.5	35.7	112260000	0	19282000	32883000	0.163897	0.685651	1	1.91526	3.77182	0.468295	22.7422	14.5988	20.2007	20.9708
Tb927.8.1510	Tb927.8.1510	595	Tb927.8.1510 | transcript=Tb927.8.1510:mRNA | gene=Tb927.8.1510 | organism=Trypanosoma_brucei_brucei_TREU927 | gene_product=ATP-dependent RNA helicase DBP2B, putative | transcript_product=ATP-dependent RNA helicase DBP2B, putative | location=Tb927_	17	17	17	39.9	39.9	39.9	62.439	72.014	248310000	59	1	11	4	6	14	11	4	6	14	11	4	6	14	569	28.5	12.7	14.1	33.6	48674000	13614000	21081000	71957000	0.163823	0.685767	1	0.597434	1.51302	0.468104	20.4492	18.6111	19.242	21.0132
Tb927.10.14500	Tb927.10.14500	136	Tb927.10.14500 | transcript=Tb927.10.14500:mRNA | gene=Tb927.10.14500 | organism=Trypanosoma_brucei_brucei_TREU927 | gene_product=hypothetical protein, conserved | transcript_product=hypothetical protein, conserved | location=Tb927_10_v5.1:3545522-	14	14	14	62.3	62.3	62.3	37.027	283.03	826160000	56	1	13	2	9	10	13	2	9	10	13	2	9	10	337	54	13.9	45.4	41.5	486070000	5662400	105620000	214640000	0.16366	0.686026	1	1.52101	2.86992	0.467676	24.4643	18.0407	22.2619	23.285
Tb927.11.2790	Tb927.11.2790	303	Tb927.11.2790 | transcript=Tb927.11.2790:mRNA | gene=Tb927.11.2790 | organism=Trypanosoma_brucei_brucei_TREU927 | gene_product=Solute carrier (proton/amino acid symporter), TRAMD3 or PAT1, putative | transcript_product=Solute carrier (proton/amino	10	10	10	22.4	22.4	22.4	80.033	51.472	31374000	14	1	10	0	1	4	10	0	1	4	10	0	1	4	709	22.4	0	3.7	9.2	25166000	0	815570	5392000	0.16298	0.687101	1	-1.25683	0.418464	-0.465901	19.5406	14.884	14.593	17.318
Tb927.5.4390; Tb05.5K5.40	Tb927.5.4390; Tb05.5K5.40	27	Tb927.5.4390 | transcript=Tb927.5.4390:mRNA | gene=Tb927.5.4390 | organism=Trypanosoma_brucei_brucei_TREU927 | gene_product=hypothetical protein, conserved | transcript_product=hypothetical protein, conserved | location=Tb927_05_v5.1:1363428-136383	9	9	9	86.7	86.7	86.7	15.063	207.62	220410000	21	2	9	0	3	4	9	0	3	4	9	0	3	4	135	86.7	0	51.9	74.1	168900000	0	17107000	34411000	0.162879	0.68726	1	2.46033	5.50343	0.465638	24.5242	14.0049	21.2207	22.229
Tb927.10.14490; Tb11.v5.0420.1	Tb927.10.14490; Tb11.v5.0420.1	55	Tb927.10.14490 | transcript=Tb927.10.14490:mRNA | gene=Tb927.10.14490 | organism=Trypanosoma_brucei_brucei_TREU927 | gene_product=hypothetical protein, conserved | transcript_product=hypothetical protein, conserved | location=Tb927_10_v5.1:3542653-	23	23	23	49.8	49.8	49.8	46.24	323.31	499110000	57	2	23	1	9	13	23	1	9	13	23	1	9	13	420	49.8	5.5	26.9	28.8	340720000	983180	47804000	109600000	0.162848	0.687309	1	1.98361	3.95481	0.465557	23.8205	15.3835	20.987	22.1842
Tb927.8.6160; Tb927.8.6150	Tb927.8.6160; Tb927.8.6150	634	Tb927.8.6160 | transcript=Tb927.8.6160:mRNA | gene=Tb927.8.6160 | organism=Trypanosoma_brucei_brucei_TREU927 | gene_product=40S ribosomal protein S8, putative | transcript_product=40S ribosomal protein S8, putative | location=Tb927_08_v5.1:1796603-	9	9	9	46.4	46.4	46.4	24.937	87.873	211860000	42	2	9	3	4	7	9	3	4	7	9	3	4	7	220	46.4	21.4	31.8	37.7	76382000	5672700	19790000	86830000	0.160938	0.690338	1	0.993762	1.99137	0.460566	23.3794	19.6283	21.4309	23.5643
Tb927.6.1400; Tb927.6.1380; Tb927.6.1360; Tb927.6.1340; Tb927.6.1320	Tb927.6.1400	506	Tb927.6.1400 | transcript=Tb927.6.1400:mRNA | gene=Tb927.6.1400 | organism=Trypanosoma_brucei_brucei_TREU927 | gene_product=cyclophilin-type peptidyl-prolyl cis-trans isomerase, putative | transcript_product=cyclophilin-type peptidyl-prolyl cis-tra	4	4	4	19.6	19.6	19.6	28.779	6.2573	4603700	4	5	2	0	1	1	2	0	1	1	2	0	1	1	260	10	0	3.5	6.2	2655500	0	0	1948200	0.160241	0.691448	1	-1.22862	0.426725	-0.458742	17.7556	14.8313	12.8209	17.3087
Tb927.2.4200	Tb927.2.4200	381	Tb927.2.4200 | transcript=Tb927.2.4200:mRNA | gene=Tb927.2.4200 | organism=Trypanosoma_brucei_brucei_TREU927 | gene_product=CMGC/CLK family protein kinase, putative | transcript_product=CMGC/CLK family protein kinase, putative | location=Tb927_02_v	1	1	1	1	1	1	113.33	1.6332	586630000	8	1	1	1	1	1	1	1	1	1	1	1	1	1	1037	1	1	1	1	72414000	60238000	62939000	63723000	0.15893	0.693538	1	-0.0605965	0.958868	-0.455311	20.2769	20.0113	20.0746	20.0924
Tb927.11.11725; Tb927.11.11475	Tb927.11.11725; Tb927.11.11475	251	Tb927.11.11725 | transcript=Tb927.11.11725:mRNA | gene=Tb927.11.11725 | organism=Trypanosoma_brucei_brucei_TREU927 | gene_product=ribosomal protein S14p/S29e | transcript_product=ribosomal protein S14p/S29e | location=Tb927_11_v5.1:3145263-3145436(	5	5	5	66.7	66.7	66.7	6.7299	215.47	324850000	34	2	1	1	1	3	1	1	1	3	1	1	1	3	57	24.6	17.5	17.5	38.6	5481500	3077500	2330500	19876000	0.158822	0.693711	1	0.728618	1.65705	0.455028	20.3862	19.5533	19.1522	22.2445
Tb927.8.5010; Tb927.8.5000; Tb927.8.4990; Tb927.8.4980; Tb927.8.4970; Tb11.v5.0538.1	Tb927.8.5010; Tb927.8.5000; Tb927.8.4990; Tb927.8.4980; Tb927.8.4970; Tb11.v5.0538.1	64	Tb927.8.5010 | transcript=Tb927.8.5010:mRNA | gene=Tb927.8.5010 | organism=Trypanosoma_brucei_brucei_TREU927 | gene_product=Paraflagellar rod protein 2-5 | transcript_product=Paraflagellar rod protein 2-5 | location=Tb927_08_v5.1:1483434-1485236(+)	64	64	63	90.2	90.2	89	69.596	323.31	3853500000	225	6	56	13	34	42	56	13	34	42	55	12	33	41	600	85.3	23.2	61.3	76.2	1919300000	86713000	645060000	1063800000	0.1575	0.695825	1	1.02191	2.03061	0.451565	25.9799	21.5118	24.4068	25.1286
Tb927.3.3790; Tb927.3.3770; Tb11.v5.0741.1	Tb927.3.3790; Tb927.3.3770; Tb11.v5.0741.1	73	Tb927.3.3790 | transcript=Tb927.3.3790:mRNA | gene=Tb927.3.3790 | organism=Trypanosoma_brucei_brucei_TREU927 | gene_product=hypothetical protein, conserved | transcript_product=hypothetical protein, conserved | location=Tb927_03_v5.1:1054662-105552	20	20	20	74.1	74.1	74.1	31.661	168.31	634790000	57	3	20	3	11	12	20	3	11	12	20	3	11	12	286	74.1	21.3	51	51	327400000	13170000	101980000	181830000	0.155682	0.698744	1	1.05226	2.07377	0.446797	24.1166	19.4808	22.4338	23.2681
Tb927.9.13920; Tb927.9.13860; Tb927.9.13820; Tb927.9.13795; Tb927.9.13785	Tb927.9.13920; Tb927.9.13860; Tb927.9.13820; Tb927.9.13795; Tb927.9.13785	679	Tb927.9.13920 | transcript=Tb927.9.13920:mRNA | gene=Tb927.9.13920 | organism=Trypanosoma_brucei_brucei_TREU927 | gene_product=kinetoplastid membrane protein 11-1 | transcript_product=kinetoplastid membrane protein 11-1 | location=Tb927_09_v5.1:218	15	15	15	82.6	82.6	82.6	11.076	323.31	1801200000	75	5	14	2	10	12	14	2	10	12	14	2	10	12	92	81.5	30.4	81.5	82.6	1007700000	21082000	253540000	468890000	0.153011	0.703055	1	1.24215	2.36551	0.43978	27.1011	21.5222	25.1103	25.9973
Tb927.4.2080	Tb927.4.2080	447	Tb927.4.2080 | transcript=Tb927.4.2080:mRNA | gene=Tb927.4.2080 | organism=Trypanosoma_brucei_brucei_TREU927 | gene_product=Coiled-coil and C2 domain-containing protein | transcript_product=Coiled-coil and C2 domain-containing protein | location=Tb	21	21	21	35.9	35.9	35.9	104.88	307.94	200610000	46	1	18	0	6	13	18	0	6	13	18	0	6	13	906	33.2	0	9.3	23.7	123380000	0	20426000	56799000	0.147715	0.711681	1	1.43769	2.70886	0.425827	21.0206	14.4313	18.4259	19.9014
Tb927.2.5660	Tb927.2.5660	396	Tb927.2.5660 | transcript=Tb927.2.5660:mRNA | gene=Tb927.2.5660 | organism=Trypanosoma_brucei_brucei_TREU927 | gene_product=adenylate kinase, putative | transcript_product=adenylate kinase, putative | location=Tb927_02_v5.1:1021719-1022501(+) | pro	20	20	20	66.9	66.9	66.9	29.339	254.49	275010000	50	1	19	0	4	14	19	0	4	14	19	0	4	14	260	66.9	0	30	60	192070000	0	11837000	71106000	0.146833	0.713128	1	2.12756	4.36977	0.423499	23.4296	13.7207	19.4094	21.996
Tb927.11.6460	Tb927.11.6460	343	Tb927.11.6460 | transcript=Tb927.11.6460:mRNA | gene=Tb927.11.6460 | organism=Trypanosoma_brucei_brucei_TREU927 | gene_product=hypothetical protein, conserved | transcript_product=hypothetical protein, conserved | location=Tb927_11_v5.1:1825897-182	27	27	27	36.9	36.9	36.9	107.35	162.35	188420000	51	1	24	1	7	17	24	1	7	17	24	1	7	17	954	34.2	1.8	13	25.3	128040000	540380	16673000	43170000	0.146267	0.714058	1	1.68946	3.22536	0.422003	21.2041	13.3157	18.2631	19.6356
Tb927.10.15760	Tb927.10.15760	152	Tb927.10.15760 | transcript=Tb927.10.15760:mRNA | gene=Tb927.10.15760 | organism=Trypanosoma_brucei_brucei_TREU927 | gene_product=hypothetical protein, conserved | transcript_product=hypothetical protein, conserved | location=Tb927_10_v5.1:3895573-	3	3	3	13.3	13.3	13.3	36.411	18.786	10973000	6	1	2	0	1	3	2	0	1	3	2	0	1	3	315	10.8	0	4.4	13.3	3776400	0	685960	6510600	0.146041	0.714428	1	1.0487	2.06867	0.421408	17.8486	14.0761	15.3878	18.6343
Tb927.8.4640	Tb927.8.4640	620	Tb927.8.4640 | transcript=Tb927.8.4640:mRNA | gene=Tb927.8.4640 | organism=Trypanosoma_brucei_brucei_TREU927 | gene_product=Component of motile flagella 19 | transcript_product=Component of motile flagella 19 | location=Tb927_08_v5.1:1366682-136783	14	14	14	33	33	33	46.865	64.737	113620000	24	1	13	0	2	7	13	0	2	7	13	0	2	7	385	33	0	3.4	16.1	80152000	0	6142400	27329000	0.145613	0.715133	1	1.99564	3.98793	0.420276	22.1688	12.9193	18.4629	20.6165
Tb927.1.4310	Tb927.1.4310	100	Tb927.1.4310 | transcript=Tb927.1.4310:mRNA | gene=Tb927.1.4310 | organism=Trypanosoma_brucei_brucei_TREU927 | gene_product=Flagellum attachment zone protein 2 | transcript_product=Flagellum attachment zone protein 2 | location=Tb927_01_v5.1:890927	28	28	28	21.4	21.4	21.4	183.76	83.159	133140000	44	1	22	0	6	16	22	0	6	16	22	0	6	16	1638	16.8	0	5.8	12.1	83455000	0	14199000	35489000	0.14248	0.720311	1	1.37364	2.59124	0.411982	19.6563	13.1201	17.101	18.4226
Tb927.11.7470	Tb927.11.7470	354	Tb927.11.7470 | transcript=Tb927.11.7470:mRNA | gene=Tb927.11.7470 | organism=Trypanosoma_brucei_brucei_TREU927 | gene_product=hypothetical protein, conserved | transcript_product=hypothetical protein, conserved | location=Tb927_11_v5.1:2120179-212	9	9	9	54.3	54.3	54.3	26.198	50.205	78974000	14	1	9	0	2	4	9	0	2	4	9	0	2	4	247	54.3	0	10.5	24.7	57610000	0	8593200	12771000	0.142039	0.721043	1	1.72152	3.29784	0.410813	22.0794	13.7178	19.3343	19.9059
Tb927.4.4700	Tb927.4.4700	477	Tb927.4.4700 | transcript=Tb927.4.4700:mRNA | gene=Tb927.4.4700 | organism=Trypanosoma_brucei_brucei_TREU927 | gene_product=hypothetical protein, conserved | transcript_product=hypothetical protein, conserved | location=Tb927_04_v5.1:1293878-129468	15	15	15	63.9	63.9	63.9	30.771	160.93	153350000	29	1	15	0	3	7	15	0	3	7	15	0	3	7	269	63.9	0	16	37.2	113660000	0	7870300	31826000	0.140219	0.72407	1	2.01465	4.04083	0.405985	22.8532	13.1353	19.0011	21.0168
Tb927.11.1430	Tb927.11.1430	270	Tb927.11.1430 | transcript=Tb927.11.1430:mRNA | gene=Tb927.11.1430 | organism=Trypanosoma_brucei_brucei_TREU927 | gene_product=Component of motile flagella 2 | transcript_product=Component of motile flagella 2 | location=Tb927_11_v5.1:422497-424755	27	27	27	51.5	51.5	51.5	86.855	323.31	301870000	57	1	25	0	6	14	25	0	6	14	25	0	6	14	752	45.2	0	11	27.8	205230000	0	21862000	73818000	0.140123	0.724231	1	1.67105	3.18446	0.405729	22.0891	14.0411	18.8584	20.6139
Tb927.10.9570; Tb11.v5.0579.1	Tb927.10.9570; Tb11.v5.0579.1	227	Tb927.10.9570 | transcript=Tb927.10.9570:mRNA | gene=Tb927.10.9570 | organism=Trypanosoma_brucei_brucei_TREU927 | gene_product=paraflagellar rod component, putative | transcript_product=paraflagellar rod component, putative | location=Tb927_10_v5.1	40	40	40	54.9	54.9	54.9	118.67	323.31	681930000	96	2	39	2	20	22	39	2	20	22	39	2	20	22	1082	53.8	3	24.4	36.5	428850000	5201700	80841000	167040000	0.138981	0.726138	1	1.29887	2.46036	0.402696	22.8685	16.5032	20.4612	21.5082
Tb927.11.15130	Tb927.11.15130	280	Tb927.11.15130 | transcript=Tb927.11.15130:mRNA | gene=Tb927.11.15130 | organism=Trypanosoma_brucei_brucei_TREU927 | gene_product=DnaJ homolog, putative | transcript_product=DnaJ homolog, putative | location=Tb927_11_v5.1:4023873-4024832(-) | prote	18	18	18	74.3	74.3	74.3	35.32	161.3	119660000	33	1	16	0	4	8	16	0	4	8	16	0	4	8	319	74.3	0	12.5	47	87386000	0	12657000	19621000	0.137731	0.72823	1	1.65123	3.14102	0.399372	22.2934	14.0485	19.506	20.1385
Tb927.11.13500	Tb927.11.13500	264	Tb927.11.13500 | transcript=Tb927.11.13500:mRNA | gene=Tb927.11.13500 | organism=Trypanosoma_brucei_brucei_TREU927 | gene_product=par1 | transcript_product=par1 | location=Tb927_11_v5.1:3610617-3612395(-) | protein_length=592 | sequence_SO=chromoso	26	26	25	49.8	49.8	46.8	68.349	224.77	458140000	55	1	23	1	8	12	23	1	8	12	23	1	8	12	592	46.1	2.5	15.5	23.1	276510000	4153400	48802000	127590000	0.13515	0.732571	1	1.21941	2.32851	0.392498	22.8728	16.8159	20.3705	21.757
Tb927.11.6300	Tb927.11.6300	340	Tb927.11.6300 | transcript=Tb927.11.6300:mRNA | gene=Tb927.11.6300 | organism=Trypanosoma_brucei_brucei_TREU927 | gene_product=40S ribosomal protein S5, putative | transcript_product=40S ribosomal protein S5, putative | location=Tb927_11_v5.1:17723	9	9	9	41.1	41.1	41.1	21.386	176.05	132230000	30	1	8	2	2	8	8	2	2	8	8	2	2	8	190	41.1	12.6	13.2	40.5	35118000	3749800	7235800	59809000	0.132988	0.736228	1	0.858251	1.81284	0.386726	21.8958	18.6684	19.6168	22.6639
Tb927.8.1550	Tb927.8.1550	597	Tb927.8.1550 | transcript=Tb927.8.1550:mRNA | gene=Tb927.8.1550 | organism=Trypanosoma_brucei_brucei_TREU927 | gene_product=paraflagellar rod component, putative | transcript_product=paraflagellar rod component, putative | location=Tb927_08_v5.1:50	35	35	35	53	53	53	88.178	323.31	1040300000	119	1	34	5	20	26	34	5	20	26	34	5	20	26	778	51.3	8.9	35.2	38.3	644350000	10895000	135480000	240500000	0.127698	0.745251	1	1.10727	2.15437	0.372562	23.7714	17.8853	21.5217	22.3496
Tb927.2.4520	Tb927.2.4520	387	Tb927.2.4520 | transcript=Tb927.2.4520:mRNA | gene=Tb927.2.4520 | organism=Trypanosoma_brucei_brucei_TREU927 | gene_product=hypothetical protein, conserved | transcript_product=hypothetical protein, conserved | location=Tb927_02_v5.1:801493-805257(	10	10	10	12.3	12.3	12.3	143.93	50.232	25790000	12	1	9	0	1	2	9	0	1	2	9	0	1	2	1254	11.1	0	1	2.2	21588000	0	1049400	3152400	0.125616	0.748831	1	-0.990174	0.503417	-0.36697	18.5058	13.3478	14.1432	15.73
Tb927.11.4480	Tb927.11.4480	321	Tb927.11.4480 | transcript=Tb927.11.4480:mRNA | gene=Tb927.11.4480 | organism=Trypanosoma_brucei_brucei_TREU927 | gene_product=Flagellar radial spoke protein 4/6 | transcript_product=Flagellar radial spoke protein 4/6 | location=Tb927_11_v5.1:12972	20	20	20	48.5	48.5	48.5	66.905	208.96	275300000	49	1	19	1	8	11	19	1	8	11	19	1	8	11	585	46	2.6	23.6	29.9	191440000	1118800	23732000	59010000	0.122859	0.7536	1	1.35447	2.55704	0.359548	22.8685	15.4497	19.8565	21.1706
Tb927.7.6910	Tb927.7.6910	580	Tb927.7.6910 | transcript=Tb927.7.6910:mRNA | gene=Tb927.7.6910 | organism=Trypanosoma_brucei_brucei_TREU927 | gene_product=Phosphatidylinositol 4-phosphate 5-kinase, putative | transcript_product=Phosphatidylinositol 4-phosphate 5-kinase, putative	31	31	31	52.7	52.7	52.7	92.255	273.41	312140000	63	1	29	1	9	13	29	1	9	13	29	1	9	13	823	49.8	2.3	17.3	25.5	230220000	835410	26964000	54115000	0.122245	0.754666	1	1.4617	2.75432	0.357892	22.3861	14.2798	19.2922	20.2971
Tb927.10.11300	Tb927.10.11300	116	Tb927.10.11300 | transcript=Tb927.10.11300:mRNA | gene=Tb927.10.11300 | organism=Trypanosoma_brucei_brucei_TREU927 | gene_product=paraflagellar rod component, putative | transcript_product=paraflagellar rod component, putative | location=Tb927_10_v	14	14	14	96.8	96.8	96.8	14.328	172.8	693660000	53	1	14	1	8	9	14	1	8	9	14	1	8	9	126	96.8	19.8	71.4	71.4	448430000	5329100	80696000	144860000	0.121196	0.756491	1	1.14513	2.21166	0.355061	25.7403	19.3455	23.266	24.11
Tb927.4.3950; Tb927.8.8330	Tb927.4.3950	467	Tb927.4.3950 | transcript=Tb927.4.3950:mRNA | gene=Tb927.4.3950 | organism=Trypanosoma_brucei_brucei_TREU927 | gene_product=cytoskeleton-associated protein CAP5.5, putative | transcript_product=cytoskeleton-associated protein CAP5.5, putative | loc	9	9	9	17.9	17.9	17.9	94.653	42.565	28946000	12	2	7	0	1	4	7	0	1	4	7	0	1	4	853	14.1	0	1.8	7.4	14795000	0	2139000	12012000	0.119053	0.760234	1	0.984891	1.97916	0.349268	18.6893	13.6287	15.8992	18.3886
Tb927.3.3690	Tb927.3.3690	417	Tb927.3.3690 | transcript=Tb927.3.3690:mRNA | gene=Tb927.3.3690 | organism=Trypanosoma_brucei_brucei_TREU927 | gene_product=flagellar radial spoke protein-like, putative | transcript_product=flagellar radial spoke protein-like, putative | location=	20	20	20	39.6	39.6	39.6	60.992	99.747	173390000	41	1	20	0	7	10	20	0	7	10	20	0	7	10	548	39.6	0	14.8	24.5	123910000	0	12922000	36555000	0.118063	0.761968	1	1.37017	2.58501	0.346589	22.2998	14.5368	19.0384	20.5386
Tb927.10.11250; Tb11.v5.0575.1	Tb927.10.11250	115	Tb927.10.11250 | transcript=Tb927.10.11250:mRNA | gene=Tb927.10.11250 | organism=Trypanosoma_brucei_brucei_TREU927 | gene_product=Coiled-coil domain-containing protein 40 homolog | transcript_product=Coiled-coil domain-containing protein 40 homolog	8	8	8	15.8	15.8	15.8	101.14	18.834	23439000	12	2	8	0	1	2	8	0	1	2	8	0	1	2	872	15.8	0	1	3.4	19739000	0	859540	2840200	0.118036	0.762016	1	-0.976436	0.508234	-0.346517	18.5341	13.1687	14.0128	15.7371
Tb927.3.3300	Tb927.3.3300	414	Tb927.3.3300 | transcript=Tb927.3.3300:mRNA | gene=Tb927.3.3300 | organism=Trypanosoma_brucei_brucei_TREU927 | gene_product=Flagellum attachment zone protein 19 | transcript_product=Flagellum attachment zone protein 19 | location=Tb927_03_v5.1:8480	12	12	12	21.9	21.9	21.9	89.197	45.634	57707000	18	1	10	0	4	7	10	0	4	7	10	0	4	7	814	18.4	0	7.1	12.5	37405000	0	6909300	13392000	0.115797	0.765954	1	1.03087	2.04325	0.340446	20.1124	14.1321	17.6757	18.6305
Tb927.10.2380	Tb927.10.2380	162	Tb927.10.2380 | transcript=Tb927.10.2380:mRNA | gene=Tb927.10.2380 | organism=Trypanosoma_brucei_brucei_TREU927 | gene_product=Tetratricopeptide repeat, putative | transcript_product=Tetratricopeptide repeat, putative | location=Tb927_10_v5.1:60941	6	6	6	13	13	13	102.45	17.81	22305000	12	1	6	0	1	3	6	0	1	3	6	0	1	3	916	13	0	1.9	5.3	17747000	0	645120	3912700	0.115058	0.76726	1	-0.960154	0.514002	-0.338439	18.5893	13.5463	13.8074	16.4079
Tb927.11.9860	Tb927.11.9860	372	Tb927.11.9860 | transcript=Tb927.11.9860:mRNA | gene=Tb927.11.9860 | organism=Trypanosoma_brucei_brucei_TREU927 | gene_product=EF-hand domain pair, putative | transcript_product=EF-hand domain pair, putative | location=Tb927_11_v5.1:2662380-2662691	13	13	13	100	100	100	11.865	159.65	553700000	36	1	10	1	5	8	10	1	5	8	10	1	5	8	103	100	12.6	56.3	66	329920000	9176300	72658000	141940000	0.114286	0.768625	1	0.884169	1.8457	0.336341	25.7126	20.5445	23.5297	24.4958
Tb927.3.4970	Tb927.3.4970	425	Tb927.3.4970 | transcript=Tb927.3.4970:mRNA | gene=Tb927.3.4970 | organism=Trypanosoma_brucei_brucei_TREU927 | gene_product=hypothetical protein, conserved | transcript_product=hypothetical protein, conserved | location=Tb927_03_v5.1:1395382-139857	12	12	12	19.3	19.3	19.3	115.81	42.607	32490000	15	1	11	0	1	3	11	0	1	3	11	0	1	3	1063	18.2	0	1.1	4.3	24191000	0	534710	7764600	0.110243	0.775813	1	-1.03612	0.487638	-0.325329	18.7466	13.6798	13.247	17.1071
Tb927.11.14900	Tb927.11.14900	275	Tb927.11.14900 | transcript=Tb927.11.14900:mRNA | gene=Tb927.11.14900 | organism=Trypanosoma_brucei_brucei_TREU927 | gene_product=coatomer subunit epsilon | transcript_product=coatomer subunit epsilon | location=Tb927_11_v5.1:3955731-3956705(-) | p	3	3	3	13.6	13.6	13.6	34.594	5.6487	8644400	8	1	1	0	1	2	1	0	1	2	1	0	1	2	324	7.1	0	3.1	6.5	2404300	0	712160	2049900	0.109421	0.777282	1	0.558453	1.47269	0.323086	17.0272	13.9249	15.2719	16.7972
Tb927.11.5680	Tb927.11.5680	333	Tb927.11.5680 | transcript=Tb927.11.5680:mRNA | gene=Tb927.11.5680 | organism=Trypanosoma_brucei_brucei_TREU927 | gene_product=dynein light chain 1, axonemal | transcript_product=dynein light chain 1, axonemal | location=Tb927_11_v5.1:1603384-16040	2	2	2	12.4	12.4	12.4	23.96	6.9296	8622800	5	1	2	0	1	1	2	0	1	1	2	0	1	1	210	12.4	0	5.7	5.7	6640300	0	642910	1339600	0.10924	0.777607	1	-0.708272	0.612053	-0.32259	19.2034	14.9419	15.8348	16.8939
Tb927.3.1990	Tb927.3.1990	405	Tb927.3.1990 | transcript=Tb927.3.1990:mRNA | gene=Tb927.3.1990 | organism=Trypanosoma_brucei_brucei_TREU927 | gene_product=Tetratricopeptide repeat, putative | transcript_product=Tetratricopeptide repeat, putative | location=Tb927_03_v5.1:519226-5	2	2	2	5.6	5.6	5.6	53.496	1.8732	7918500	3	1	1	0	1	2	1	0	1	2	1	0	1	2	481	2.7	0	2.7	5.6	3686800	0	1099500	3132200	0.108	0.779831	1	0.546619	1.46066	0.319199	16.8598	13.7858	15.1142	16.6246
Tb927.10.5990; Tb11.v5.0193.1	Tb927.10.5990; Tb11.v5.0193.1	45	Tb927.10.5990 | transcript=Tb927.10.5990:mRNA | gene=Tb927.10.5990 | organism=Trypanosoma_brucei_brucei_TREU927 | gene_product=Centrosomal protein of 57 kDa, putative | transcript_product=Centrosomal protein of 57 kDa, putative | location=Tb927_10_	3	3	3	9.7	9.7	9.7	50.768	8.2702	16772000	7	2	3	0	2	2	3	0	2	2	3	0	2	2	443	9.7	0	6.5	6.5	8188900	0	2620000	5963400	0.107454	0.780811	1	0.539162	1.45313	0.317705	18.0583	14.8784	16.4142	17.6008
Tb927.9.6130	Tb927.9.6130	708	Tb927.9.6130 | transcript=Tb927.9.6130:mRNA | gene=Tb927.9.6130 | organism=Trypanosoma_brucei_brucei_TREU927 | gene_product=calmodulin, putative | transcript_product=calmodulin, putative | location=Tb927_09_v5.1:1018085-1018558(+) | protein_length=	3	3	3	33.8	33.8	33.8	17.842	23.003	33350000	10	1	3	0	1	2	3	0	1	2	3	0	1	2	157	33.8	0	13.4	20.4	23832000	0	1587800	7929600	0.106032	0.783371	1	1.33058	2.51504	0.313811	21.1845	13.0279	17.2767	19.5969
Tb927.10.830	Tb927.10.830	217	Tb927.10.830 | transcript=Tb927.10.830:mRNA | gene=Tb927.10.830 | organism=Trypanosoma_brucei_brucei_TREU927 | gene_product=adenylate kinase, putative | transcript_product=adenylate kinase, putative | location=Tb927_10_v5.1:215236-216018(+) | prote	7	7	7	34.2	34.2	34.2	29.765	115.28	91259000	17	1	7	0	2	3	7	0	2	3	7	0	2	3	260	34.2	0	8.8	14.2	66715000	0	7897600	15276000	0.105914	0.783585	1	1.20198	2.30055	0.313486	22.2911	14.6819	19.2125	20.1644
Tb927.7.7030	Tb927.7.7030	582	Tb927.7.7030 | transcript=Tb927.7.7030:mRNA | gene=Tb927.7.7030 | organism=Trypanosoma_brucei_brucei_TREU927 | gene_product=zinc-finger of a C2HC-type, putative | transcript_product=zinc-finger of a C2HC-type, putative | location=Tb927_07_v5.1:2009	3	3	3	6	6	6	68.705	7.4368	6434500	5	1	2	0	1	2	2	0	1	2	2	0	1	2	651	5.2	0	3.2	5.2	2140100	0	927790	3366700	0.105339	0.784623	1	0.349533	1.27415	0.311909	16.0292	14.778	14.8234	16.6829
Tb927.8.810	Tb927.8.810	646	Tb927.8.810 | transcript=Tb927.8.810:mRNA | gene=Tb927.8.810 | organism=Trypanosoma_brucei_brucei_TREU927 | gene_product=radial spoke protein RSP9, putative | transcript_product=radial spoke protein RSP9, putative | location=Tb927_08_v5.1:231908-23	9	9	9	37.5	37.5	37.5	37.518	51.487	82605000	20	1	9	1	3	5	9	1	3	5	9	1	3	5	333	37.5	3	16.8	20.7	50362000	1278500	10971000	18339000	0.103615	0.787744	1	0.821907	1.76774	0.307174	21.1935	15.8937	18.9949	19.7361
Tb927.3.3750	Tb927.3.3750	419	Tb927.3.3750 | transcript=Tb927.3.3750:mRNA | gene=Tb927.3.3750 | organism=Trypanosoma_brucei_brucei_TREU927 | gene_product=paraflagellar rod component, putative | transcript_product=paraflagellar rod component, putative | location=Tb927_03_v5.1:10	11	11	11	79.5	79.5	79.5	19.859	212.29	371450000	31	1	11	1	6	6	11	1	6	6	11	1	6	6	176	79.5	11.9	51.7	46	249060000	3490100	42217000	76679000	0.102866	0.789104	1	0.948446	1.92979	0.305114	24.57	18.4129	22.0094	22.8704
Tb927.7.1920	Tb927.7.1920	539	Tb927.7.1920 | transcript=Tb927.7.1920:mRNA | gene=Tb927.7.1920 | organism=Trypanosoma_brucei_brucei_TREU927 | gene_product=paraflagellar rod component, putative | transcript_product=paraflagellar rod component, putative | location=Tb927_07_v5.1:45	19	19	19	46.4	46.4	46.4	59.271	158.45	128780000	34	1	18	0	3	10	18	0	3	10	18	0	3	10	543	46.4	0	14	29.5	98753000	0	6701000	23326000	0.102523	0.789726	1	1.34386	2.53829	0.304172	21.9135	13.2625	18.0321	19.8315
Tb927.1.2390; Tb927.1.2370; Tb927.1.2350; Tb927.1.2330; Tb11.v5.0469.1; Tb927.1.2410	Tb927.1.2390; Tb927.1.2370; Tb927.1.2350; Tb927.1.2330; Tb11.v5.0469.1; Tb927.1.2410	57	Tb927.1.2390 | transcript=Tb927.1.2390:mRNA | gene=Tb927.1.2390 | organism=Trypanosoma_brucei_brucei_TREU927 | gene_product=beta tubulin | transcript_product=beta tubulin | location=Tb927_01_v5.1:581408-582736(+) | protein_length=442 | sequence_SO=	42	42	42	74.9	74.9	74.9	49.704	323.31	19651000000	293	6	41	20	31	36	41	20	31	36	41	20	31	36	442	74.9	54.3	70.8	74.9	10637000000	467270000	2475500000	5344600000	0.102519	0.789735	1	0.70617	1.63147	0.30416	28.9865	24.4778	26.8831	27.9935
Tb11.v5.0394.1; Tb927.10.15750	Tb11.v5.0394.1; Tb927.10.15750	53	Tb11.v5.0394.1 | transcript=Tb11.v5.0394.1 | gene=Tb11.v5.0394 | organism=Trypanosoma_brucei_brucei_TREU927 | gene_product=hypothetical protein, conserved | transcript_product=hypothetical protein, conserved | location=Tb927_11_bin_v5.1:1381337-1386175(	7	7	7	21.8	21.8	21.8	183.78	58.754	46834000	12	2	6	0	3	3	6	0	3	3	6	0	3	3	1612	20.3	0	12.4	9.7	23018000	0	10781000	13035000	0.102469	0.789825	1	0.421145	1.33899	0.304023	17.9644	15.2075	16.8701	17.1441
Tb927.4.1890	Tb927.4.1890	446	Tb927.4.1890 | transcript=Tb927.4.1890:mRNA | gene=Tb927.4.1890 | organism=Trypanosoma_brucei_brucei_TREU927 | gene_product=hypothetical protein, conserved | transcript_product=hypothetical protein, conserved | location=Tb927_04_v5.1:474726-475400(	3	3	3	31.2	31.2	31.2	26.433	34.315	26195000	8	1	3	0	1	1	3	0	1	1	3	0	1	1	224	31.2	0	5.4	9.8	21508000	0	1044800	3642900	0.102361	0.790022	1	-0.841736	0.557972	-0.303725	20.7734	15.5316	16.4099	18.2117
Tb927.10.3160	Tb927.10.3160	170	Tb927.10.3160 | transcript=Tb927.10.3160:mRNA | gene=Tb927.10.3160 | organism=Trypanosoma_brucei_brucei_TREU927 | gene_product=hypothetical protein, conserved | transcript_product=hypothetical protein, conserved | location=Tb927_10_v5.1:823231-8236	6	6	6	61.5	61.5	61.5	14.605	33.247	34872000	13	1	6	0	1	5	6	0	1	5	6	0	1	5	130	61.5	0	11.5	53.8	24243000	0	3531000	7098400	0.101467	0.79165	1	0.997794	1.99694	0.301263	21.2091	14.6621	18.4297	19.4371
Tb927.5.1730	Tb927.5.1730	490	Tb927.5.1730 | transcript=Tb927.5.1730:mRNA | gene=Tb927.5.1730 | organism=Trypanosoma_brucei_brucei_TREU927 | gene_product=Ecotin-like protein | transcript_product=Ecotin-like protein | location=Tb927_05_v5.1:602593-603090(+) | protein_length=165	7	7	7	66.7	66.7	66.7	19.342	94.757	57556000	14	1	7	0	2	4	7	0	2	4	7	0	2	4	165	66.7	0	18.8	52.1	44449000	0	5307600	7799000	0.101165	0.7922	1	1.20163	2.29999	0.300432	22.0837	14.1036	19.0177	19.5729
Tb927.9.9100	Tb927.9.9100	721	Tb927.9.9100 | transcript=Tb927.9.9100:mRNA | gene=Tb927.9.9100 | organism=Trypanosoma_brucei_brucei_TREU927 | gene_product=hypothetical protein, conserved | transcript_product=hypothetical protein, conserved | location=Tb927_09_v5.1:1452678-145293	7	7	7	90.5	90.5	90.5	9.5887	60.238	264190000	22	1	6	1	4	7	6	1	4	7	6	1	4	7	84	89.3	25	40.5	90.5	158390000	4492000	30946000	68776000	0.101046	0.792417	1	0.79041	1.72957	0.300103	24.654	19.514	22.2983	23.4505
Tb927.3.3200	Tb927.3.3200	412	Tb927.3.3200 | transcript=Tb927.3.3200:mRNA | gene=Tb927.3.3200 | organism=Trypanosoma_brucei_brucei_TREU927 | gene_product=Domain of unknown function (DUF4586), putative | transcript_product=Domain of unknown function (DUF4586), putative | locatio	2	2	2	9.1	9.1	9.1	39.357	7.634	10640000	5	1	1	0	1	2	1	0	1	2	1	0	1	2	350	2.3	0	2.3	9.1	5179400	0	1436900	4023900	0.100692	0.793064	1	0.540638	1.45462	0.299127	17.9824	14.6871	16.1326	17.6182
Tb927.10.8930	Tb927.10.8930	223	Tb927.10.8930 | transcript=Tb927.10.8930:mRNA | gene=Tb927.10.8930 | organism=Trypanosoma_brucei_brucei_TREU927 | gene_product=paraflagellar rod component, putative | transcript_product=paraflagellar rod component, putative | location=Tb927_10_v5.1	27	27	27	41.1	41.1	41.1	80.014	323.31	165430000	39	1	25	0	6	8	25	0	6	8	25	0	6	8	710	39.7	0	13.2	17.5	124040000	0	13731000	27658000	0.100079	0.794184	1	1.14452	2.21073	0.297436	22.1313	14.502	18.956	19.9663
Tb927.1.2230	Tb927.1.2230	86	Tb927.1.2230 | transcript=Tb927.1.2230:mRNA | gene=Tb927.1.2230 | organism=Trypanosoma_brucei_brucei_TREU927 | gene_product=small myristoylated protein 1-1 | transcript_product=small myristoylated protein 1-1 | location=Tb927_01_v5.1:562244-562615(	5	3	3	39	17.9	17.9	13.535	5.0158	78489000	4	1	3	1	2	4	2	1	1	2	2	1	1	2	123	23.6	9.8	22	37.4	45592000	1780200	10532000	20584000	0.0998048	0.794685	1	0.708689	1.63432	0.296679	22.4423	17.7636	20.3283	21.295
Tb927.10.15690	Tb927.10.15690	151	Tb927.10.15690 | transcript=Tb927.10.15690:mRNA | gene=Tb927.10.15690 | organism=Trypanosoma_brucei_brucei_TREU927 | gene_product=anaphase promoting complex, subunit 10-like protein | transcript_product=anaphase promoting complex, subunit 10-like p	2	2	2	14	14	14	25.691	8.6112	1844600	3	1	1	0	1	1	1	0	1	1	1	0	1	1	235	7.2	0	6.8	7.2	855150	0	323280	666170	0.0995535	0.795145	1	0.413222	1.33166	0.295985	16.8984	14.3084	15.4951	16.5382
Tb927.4.1860	Tb927.4.1860	445	Tb927.4.1860 | transcript=Tb927.4.1860:mRNA | gene=Tb927.4.1860 | organism=Trypanosoma_brucei_brucei_TREU927 | gene_product=ribosomal protein S19, putative | transcript_product=ribosomal protein S19, putative | location=Tb927_04_v5.1:465052-465555(	12	12	12	58.1	58.1	58.1	18.846	89.26	317810000	44	1	11	3	4	10	11	3	4	10	11	3	4	10	167	58.1	21.6	31.1	50.9	140990000	7474000	23538000	106360000	0.0873605	0.817786	1	0.624206	1.54136	0.262078	24.486	20.2485	21.9035	24.0794
Tb927.9.14480	Tb927.9.14480	682	Tb927.9.14480 | transcript=Tb927.9.14480:mRNA | gene=Tb927.9.14480 | organism=Trypanosoma_brucei_brucei_TREU927 | gene_product=dynein-associated protein, putative | transcript_product=dynein-associated protein, putative | location=Tb927_09_v5.1:226	4	4	4	79.6	79.6	79.6	11.13	31.115	16805000	6	1	4	0	1	1	4	0	1	1	4	0	1	1	98	79.6	0	21.4	21.4	12399000	0	2156200	2250200	0.08714	0.818201	1	0.882577	1.84367	0.26146	20.9788	14.2279	18.4551	18.5167
Tb927.10.7690	Tb927.10.7690	211	Tb927.10.7690 | transcript=Tb927.10.7690:mRNA | gene=Tb927.10.7690 | organism=Trypanosoma_brucei_brucei_TREU927 | gene_product=Component of motile flagella 4 | transcript_product=Component of motile flagella 4 | location=Tb927_10_v5.1:1934727-19369	10	10	10	22.5	22.5	22.5	82.837	25.241	29334000	13	1	10	0	1	2	10	0	1	2	10	0	1	2	724	22.5	0	4.7	6.2	22706000	0	2106900	4521400	0.0869842	0.818495	1	-0.609581	0.655387	-0.261023	19.0103	14.4714	15.5804	16.6821
Tb927.7.6890	Tb927.7.6890	578	Tb927.7.6890 | transcript=Tb927.7.6890:mRNA | gene=Tb927.7.6890 | organism=Trypanosoma_brucei_brucei_TREU927 | gene_product=methyltransferase domain containing protein, putative | transcript_product=methyltransferase domain containing protein, puta	8	8	8	35.8	35.8	35.8	28.794	20.007	54824000	13	1	8	0	2	2	8	0	2	2	8	0	2	2	254	35.8	0	9.4	9.4	40836000	0	5524000	8464800	0.0818243	0.828277	1	0.848004	1.80001	0.246515	21.5829	14.7305	18.6968	19.3126
Tb927.11.8950	Tb927.11.8950	363	Tb927.11.8950 | transcript=Tb927.11.8950:mRNA | gene=Tb927.11.8950 | organism=Trypanosoma_brucei_brucei_TREU927 | gene_product=leucine rich repeat | transcript_product=leucine rich repeat | location=Tb927_11_v5.1:2454099-2456240(+) | protein_length	4	4	4	5.8	5.8	5.8	78.96	43.585	12574000	8	1	2	0	2	3	2	0	2	3	2	0	2	3	713	3.6	0	4.2	3.8	4024100	0	1930700	6619400	0.0816265	0.828654	1	0.240919	1.18175	0.245957	16.4484	15.625	15.3888	17.1664
Tb927.8.5230	Tb927.8.5230	626	Tb927.8.5230 | transcript=Tb927.8.5230:mRNA | gene=Tb927.8.5230 | organism=Trypanosoma_brucei_brucei_TREU927 | gene_product=peptidyl-prolyl cis-trans isomerase, putative | transcript_product=peptidyl-prolyl cis-trans isomerase, putative | location=	8	8	8	56.4	56.4	56.4	30.645	123.46	44746000	13	1	8	0	1	4	8	0	1	4	8	0	1	4	282	56.4	0	2.8	23.4	33348000	0	2424800	8973400	0.0808173	0.8302	1	0.951564	1.93397	0.243672	21.4061	13.8275	17.6245	19.5123
Tb927.10.6960; Tb927.10.6920; Tb10.v4.0248	Tb927.10.6960; Tb927.10.6920; Tb10.v4.0248	33	Tb927.10.6960 | transcript=Tb927.10.6960:mRNA | gene=Tb927.10.6960 | organism=Trypanosoma_brucei_brucei_TREU927 | gene_product=hypothetical protein, conserved | transcript_product=hypothetical protein, conserved | location=Tb927_10_v5.1:1755170-175	4	4	4	20.3	20.3	20.3	36.056	24.016	48948000	9	3	4	0	1	2	4	0	1	2	4	0	1	2	320	20.3	0	4.7	10	42048000	0	0	6899900	0.0803454	0.831102	1	-1.0521	0.482265	-0.242339	21.0036	13.5088	14.012	18.3962
Tb927.5.1230; Tb11.v5.0639.1	Tb927.5.1230; Tb11.v5.0639.1	68	Tb927.5.1230 | transcript=Tb927.5.1230:mRNA | gene=Tb927.5.1230 | organism=Trypanosoma_brucei_brucei_TREU927 | gene_product=hypothetical protein, conserved | transcript_product=hypothetical protein, conserved | location=Tb927_05_v5.1:465845-467296(	13	13	13	34.2	34.2	34.2	58.564	103.54	97698000	27	2	13	0	3	6	13	0	3	6	13	0	3	6	483	34.2	0	6.6	15.9	79236000	0	4292300	14170000	0.0801219	0.83153	1	1.09259	2.13257	0.241707	21.7161	12.8412	17.5097	19.2327
Tb927.10.8200	Tb927.10.8200	216	Tb927.10.8200 | transcript=Tb927.10.8200:mRNA | gene=Tb927.10.8200 | organism=Trypanosoma_brucei_brucei_TREU927 | gene_product=Ribosomal protein L1p/L10e family, putative | transcript_product=Ribosomal protein L1p/L10e family, putative | location=T	1	1	1	2.6	2.6	2.6	30.838	3.9936	25009000	4	1	1	1	1	1	1	1	1	1	1	1	1	1	269	2.6	2.6	2.6	2.6	7540100	5303100	4346000	7820000	0.0786054	0.834439	1	-0.117276	0.921927	-0.237415	19.0388	18.531	18.2439	19.0914
Tb927.11.7240; Tb11.v5.0258.1	Tb927.11.7240; Tb11.v5.0258.1	51	Tb927.11.7240 | transcript=Tb927.11.7240:mRNA | gene=Tb927.11.7240 | organism=Trypanosoma_brucei_brucei_TREU927 | gene_product=nexin-dynein regulatory complex 2 | transcript_product=nexin-dynein regulatory complex 2 | location=Tb927_11_v5.1:2047814	3	3	3	6.1	6.1	6.1	58.672	7.0983	5899000	4	2	3	0	1	1	3	0	1	1	3	0	1	1	507	6.1	0	2	2	3676900	0	608320	1613800	0.0775201	0.836527	1	-0.388888	0.763718	-0.234338	16.9031	13.8974	14.3076	15.7152
Tb927.9.15190	Tb927.9.15190	685	Tb927.9.15190 | transcript=Tb927.9.15190:mRNA | gene=Tb927.9.15190 | organism=Trypanosoma_brucei_brucei_TREU927 | gene_product=ribosomal protein L15, putative | transcript_product=ribosomal protein L15, putative | location=Tb927_09_v5.1:2361569-236	8	1	1	41.7	5.4	5.4	24.401	1.8133	2707300	2	1	3	2	4	6	0	0	0	1	0	0	0	1	204	26	13.2	16.7	28.9	0	0	0	1677800	0.0765873	0.838326	1	0.566018	1.48043	0.23169	14.7976	14.9278	12.9866	17.8708
Tb927.1.2400; Tb927.1.2380; Tb927.1.2360; Tb927.1.2340; Tb11.v5.0468.1	Tb927.1.2400; Tb927.1.2380; Tb927.1.2360; Tb927.1.2340; Tb11.v5.0468.1	88	Tb927.1.2400 | transcript=Tb927.1.2400:mRNA | gene=Tb927.1.2400 | organism=Trypanosoma_brucei_brucei_TREU927 | gene_product=alpha tubulin | transcript_product=alpha tubulin | location=Tb927_01_v5.1:583368-584723(+) | protein_length=451 | sequence_S	48	48	48	83.1	83.1	83.1	49.787	323.31	17659000000	285	5	48	16	27	40	48	16	27	40	48	16	27	40	451	83.1	38.8	66.1	81.2	10261000000	380070000	1675400000	4995000000	0.07245	0.84635	1	0.550763	1.46486	0.219905	28.8641	24.1094	26.2495	27.8255
Tb927.11.4920	Tb927.11.4920	325	Tb927.11.4920 | transcript=Tb927.11.4920:mRNA | gene=Tb927.11.4920 | organism=Trypanosoma_brucei_brucei_TREU927 | gene_product=hypothetical protein, conserved | transcript_product=hypothetical protein, conserved | location=Tb927_11_v5.1:1405656-140	9	9	9	40.1	40.1	40.1	30.707	72.663	54670000	9	1	8	0	1	3	8	0	1	3	8	0	1	3	272	34.6	0	4.4	13.6	46375000	0	863440	7431900	0.071778	0.847661	1	-0.811399	0.569829	-0.217985	21.2969	14.5311	15.5498	18.6554
Tb927.9.6920	Tb927.9.6920	711	Tb927.9.6920 | transcript=Tb927.9.6920:mRNA | gene=Tb927.9.6920 | organism=Trypanosoma_brucei_brucei_TREU927 | gene_product=hypothetical protein, conserved | transcript_product=hypothetical protein, conserved | location=Tb927_09_v5.1:1130911-113199	13	13	13	47.8	47.8	47.8	41.39	43.638	93068000	25	1	12	0	3	8	12	0	3	8	12	0	3	8	362	41.4	0	14.6	31.8	54955000	0	4713600	33399000	0.0703037	0.850543	1	0.670691	1.59183	0.213765	21.1268	15.5236	17.5834	20.4083
Tb927.8.8280	Tb927.8.8280	649	Tb927.8.8280 | transcript=Tb927.8.8280:mRNA | gene=Tb927.8.8280 | organism=Trypanosoma_brucei_brucei_TREU927 | gene_product=hypothetical protein, conserved | transcript_product=hypothetical protein, conserved | location=Tb927_08_v5.1:2451686-245247	5	5	5	22.1	22.1	22.1	30.098	41.583	22872000	8	1	5	0	1	2	5	0	1	2	5	0	1	2	262	22.1	0	3.8	8	17953000	0	1417900	3501500	0.0669878	0.857062	1	0.78692	1.72539	0.204242	20.5128	12.9182	16.8503	18.1546
Tb927.7.4510; Tb11.v5.0264.1	Tb927.7.4510; Tb11.v5.0264.1	52	Tb927.7.4510 | transcript=Tb927.7.4510:mRNA | gene=Tb927.7.4510 | organism=Trypanosoma_brucei_brucei_TREU927 | gene_product=Domain of unknown function (DUF4201), putative | transcript_product=Domain of unknown function (DUF4201), putative | locatio	1	1	1	3.9	3.9	3.9	48.154	7.3936	7093000	3	2	1	0	1	1	1	0	1	1	1	0	1	1	407	3.9	0	3.9	3.9	4000500	0	1047400	2045100	0.0640921	0.862796	1	0.368732	1.29122	0.195889	17.2879	13.6491	15.3545	16.3199
Tb927.3.3040	Tb927.3.3040	410	Tb927.3.3040 | transcript=Tb927.3.3040:mRNA | gene=Tb927.3.3040 | organism=Trypanosoma_brucei_brucei_TREU927 | gene_product=Right handed beta helix region, putative | transcript_product=Right handed beta helix region, putative | location=Tb927_03_v	7	7	7	39.7	39.7	39.7	28.762	116.99	56576000	14	1	7	0	3	4	7	0	3	4	7	0	3	4	267	39.7	0	17.2	17.2	47567000	0	2756300	6252700	0.0600685	0.870826	1	-0.556395	0.679999	-0.184223	21.6961	15.7724	17.587	18.7687
Tb927.9.1980	Tb927.9.1980	691	Tb927.9.1980 | transcript=Tb927.9.1980:mRNA | gene=Tb927.9.1980 | organism=Trypanosoma_brucei_brucei_TREU927 | gene_product=hypothetical protein, conserved | transcript_product=hypothetical protein, conserved | location=Tb927_09_v5.1:448276-450390(	14	14	14	29.3	29.3	29.3	78.486	79.425	49135000	19	1	13	0	3	5	13	0	3	5	13	0	3	5	704	27	0	7.7	12.9	36429000	0	4025700	8679900	0.058921	0.87313	1	0.589817	1.50506	0.180883	19.9893	13.5626	16.8115	17.92
Tb927.7.3740	Tb927.7.3740	562	Tb927.7.3740 | transcript=Tb927.7.3740:mRNA | gene=Tb927.7.3740 | organism=Trypanosoma_brucei_brucei_TREU927 | gene_product=hypothetical protein, conserved | transcript_product=hypothetical protein, conserved | location=Tb927_07_v5.1:978815-981364(	20	20	20	29.2	29.2	29.2	93.25	222.92	186080000	39	1	20	1	3	10	20	1	3	10	20	1	3	10	849	29.2	2.5	6.5	16.5	142220000	857560	9212100	33790000	0.0578187	0.875349	1	0.675883	1.59757	0.177669	21.4397	14.066	17.4912	19.3662
Tb927.11.7560	Tb927.11.7560	355	Tb927.11.7560 | transcript=Tb927.11.7560:mRNA | gene=Tb927.11.7560 | organism=Trypanosoma_brucei_brucei_TREU927 | gene_product=Component of motile flagella 15 | transcript_product=Component of motile flagella 15 | location=Tb927_11_v5.1:2138649-214	11	11	11	23.2	23.2	23.2	67.695	53.284	52323000	13	1	10	0	2	5	10	0	2	5	10	0	2	5	629	21.6	0	3.3	10.7	35326000	0	5406900	11590000	0.0574877	0.876017	1	0.475332	1.39024	0.176702	19.9449	14.6786	17.2371	18.3371
Tb927.7.3920	Tb927.7.3920	563	Tb927.7.3920 | transcript=Tb927.7.3920:mRNA | gene=Tb927.7.3920 | organism=Trypanosoma_brucei_brucei_TREU927 | gene_product=hypothetical protein, conserved | transcript_product=hypothetical protein, conserved | location=Tb927_07_v5.1:1024201-102516	6	6	5	39.4	39.4	35	36.085	8.2888	25528000	10	1	5	0	1	3	5	0	1	3	5	0	1	3	320	35	0	7.2	20.6	17215000	0	2270000	6043200	0.0566258	0.877757	1	0.486657	1.40119	0.174184	20.0371	14.6308	17.1143	18.5269
Tb927.11.6530	Tb927.11.6530	345	Tb927.11.6530 | transcript=Tb927.11.6530:mRNA | gene=Tb927.11.6530 | organism=Trypanosoma_brucei_brucei_TREU927 | gene_product=hypothetical protein, conserved | transcript_product=hypothetical protein, conserved | location=Tb927_11_v5.1:1836934-183	9	9	9	34.2	34.2	34.2	45.865	45.181	45641000	18	1	9	0	2	7	9	0	2	7	9	0	2	7	415	34.2	0	9.4	28.4	31363000	0	2025700	12252000	0.0529203	0.885278	1	0.567257	1.4817	0.16332	20.2587	13.8156	16.3061	18.9027
Tb927.1.2670	Tb927.1.2670	90	Tb927.1.2670 | transcript=Tb927.1.2670:mRNA | gene=Tb927.1.2670 | organism=Trypanosoma_brucei_brucei_TREU927 | gene_product=paralyzed flagella 16 | transcript_product=paralyzed flagella 16 | location=Tb927_01_v5.1:618929-620470(+) | protein_length=	14	14	14	40.4	40.4	40.4	56.126	91.843	64247000	20	1	12	0	3	3	12	0	3	3	12	0	3	3	513	34.9	0	6	8	49571000	0	6172700	8503300	0.0515675	0.88804	1	0.527399	1.44133	0.159337	20.7556	14.1519	17.7501	18.2122
Tb927.11.2570	Tb927.11.2570	301	Tb927.11.2570 | transcript=Tb927.11.2570:mRNA | gene=Tb927.11.2570 | organism=Trypanosoma_brucei_brucei_TREU927 | gene_product=hypothetical protein, conserved | transcript_product=hypothetical protein, conserved | location=Tb927_11_v5.1:754151-7558	11	11	11	33.3	33.3	33.3	63.115	59.83	44093000	18	1	11	0	1	4	11	0	1	4	11	0	1	4	573	33.3	0	6.1	14.5	31667000	0	4536400	7889200	0.051512	0.888153	1	0.460378	1.3759	0.159174	19.707	13.9778	16.9036	17.702
Tb927.4.4690	Tb927.4.4690	476	Tb927.4.4690 | transcript=Tb927.4.4690:mRNA | gene=Tb927.4.4690 | organism=Trypanosoma_brucei_brucei_TREU927 | gene_product=hypothetical protein, conserved | transcript_product=hypothetical protein, conserved | location=Tb927_04_v5.1:1292329-129316	10	10	10	47.5	47.5	47.5	31.337	121.63	105390000	18	1	9	0	1	5	9	0	1	5	9	0	1	5	278	43.2	0	5.8	31.7	76360000	0	6663400	22370000	0.0509628	0.889277	1	0.516798	1.43078	0.157554	22.0164	15.6931	18.4979	20.2452
Tb927.9.5900	Tb927.9.5900	707	Tb927.9.5900 | transcript=Tb927.9.5900:mRNA | gene=Tb927.9.5900 | organism=Trypanosoma_brucei_brucei_TREU927 | gene_product=glutamate dehydrogenase | transcript_product=glutamate dehydrogenase | location=Tb927_09_v5.1:995307-998285(+) | protein_len	1	1	1	1.8	1.8	1.8	112.11	1.3967	2536800	2	1	0	0	1	1	0	0	1	1	0	0	1	1	992	0	0	1.8	1.8	0	0	859390	1677400	0.0508482	0.889512	1	0.151654	1.11084	0.157216	13.4804	15.1511	13.985	14.9498
Tb927.8.2030	Tb927.8.2030	600	Tb927.8.2030 | transcript=Tb927.8.2030:mRNA | gene=Tb927.8.2030 | organism=Trypanosoma_brucei_brucei_TREU927 | gene_product=hypothetical protein, conserved | transcript_product=hypothetical protein, conserved | location=Tb927_08_v5.1:638854-640119(	6	6	6	25.9	25.9	25.9	48.238	8.0017	20293000	10	1	5	0	1	4	5	0	1	4	5	0	1	4	421	23.3	0	4	14	10899000	0	1598000	7796100	0.0505399	0.890144	1	0.358001	1.28165	0.156306	18.7928	14.8235	16.0229	18.3094
Tb927.3.2890	Tb927.3.2890	408	Tb927.3.2890 | transcript=Tb927.3.2890:mRNA | gene=Tb927.3.2890 | organism=Trypanosoma_brucei_brucei_TREU927 | gene_product=radial spoke protein RSP10, putative | transcript_product=radial spoke protein RSP10, putative | location=Tb927_03_v5.1:7442	6	6	6	26.7	26.7	26.7	37.011	164.48	40499000	15	1	6	0	2	2	6	0	2	2	6	0	2	2	322	26.7	0	10.6	5	31918000	0	4245800	4336000	0.0455002	0.900533	1	0.476662	1.39152	0.141368	20.8404	14.0969	17.9301	17.9605
Tb927.11.15220	Tb927.11.15220	283	Tb927.11.15220 | transcript=Tb927.11.15220:mRNA | gene=Tb927.11.15220 | organism=Trypanosoma_brucei_brucei_TREU927 | gene_product=hypothetical protein, conserved | transcript_product=hypothetical protein, conserved | location=Tb927_11_v5.1:4041643-	3	3	3	11	11	11	33.135	71.205	26457000	7	1	3	0	2	2	3	0	2	2	3	0	2	2	301	11	0	11	11	17123000	0	3849600	5484300	0.0449715	0.90163	1	0.31081	1.2404	0.139794	20.4445	16.0272	18.2913	18.8019
Tb927.3.5020	Tb927.3.5020	428	Tb927.3.5020 | transcript=Tb927.3.5020:mRNA | gene=Tb927.3.5020 | organism=Trypanosoma_brucei_brucei_TREU927 | gene_product=Flagellar Member 6 | transcript_product=Flagellar Member 6 | location=Tb927_03_v5.1:1408124-1412365(+) | protein_length=1413	13	13	13	17.3	17.3	17.3	155.86	37.74	29480000	15	1	11	0	1	5	11	0	1	5	11	0	1	5	1413	14.5	0	1.3	5.5	20423000	0	1656200	7400400	0.0440565	0.903532	1	-0.336843	0.791772	-0.137066	18.0939	13.6788	14.4696	16.6294
Tb927.6.4520	Tb927.6.4520	527	Tb927.6.4520 | transcript=Tb927.6.4520:mRNA | gene=Tb927.6.4520 | organism=Trypanosoma_brucei_brucei_TREU927 | gene_product=Tumour suppressor, Mitostatin, putative | transcript_product=Tumour suppressor, Mitostatin, putative | location=Tb927_06_v5.	11	11	11	29.8	29.8	29.8	52.589	34.618	71436000	18	1	10	0	1	5	10	0	1	5	10	0	1	5	436	26.8	0	2.3	12.6	52435000	0	1760800	17240000	0.0430497	0.905629	1	0.555938	1.47012	0.134059	21.2517	13.6388	16.3555	19.6469
Tb927.10.12410	Tb927.10.12410	124	Tb927.10.12410 | transcript=Tb927.10.12410:mRNA | gene=Tb927.10.12410 | organism=Trypanosoma_brucei_brucei_TREU927 | gene_product=hypothetical protein, conserved | transcript_product=hypothetical protein, conserved | location=Tb927_10_v5.1:3009094-	4	4	4	25	25	25	24.659	62.988	23829000	8	1	4	0	1	2	4	0	1	2	4	0	1	2	228	25	0	7	12.3	16969000	0	1559300	5300500	0.0412358	0.909419	1	0.397109	1.31687	0.128629	20.316	14.3992	16.8721	18.6373
Tb927.9.8990	Tb927.9.8990	720	Tb927.9.8990 | transcript=Tb927.9.8990:mRNA | gene=Tb927.9.8990 | organism=Trypanosoma_brucei_brucei_TREU927 | gene_product=Ankyrin repeats (3 copies), putative | transcript_product=Ankyrin repeats (3 copies), putative | location=Tb927_09_v5.1:1440	6	6	6	32.5	32.5	32.5	38.856	14.846	22688000	10	1	6	0	1	2	6	0	1	2	6	0	1	2	345	32.5	0	5.2	10.7	17322000	0	1698600	3667300	0.0393046	0.913472	1	0.39809	1.31776	0.122829	20.2388	13.8526	16.8886	17.9989
Tb927.4.1740	Tb927.4.1740	443	Tb927.4.1740 | transcript=Tb927.4.1740:mRNA | gene=Tb927.4.1740 | organism=Trypanosoma_brucei_brucei_TREU927 | gene_product=Component of motile flagella 41 | transcript_product=Component of motile flagella 41 | location=Tb927_04_v5.1:441720-442988(	10	10	10	41	41	41	47.677	83.534	43869000	16	1	10	0	1	3	10	0	1	3	10	0	1	3	422	41	0	6.2	11.8	33825000	0	1667700	8376400	0.0388303	0.914471	1	0.464198	1.37955	0.121402	20.6193	13.3351	16.2771	18.6056
Tb927.10.14010	Tb927.10.14010	132	Tb927.10.14010 | transcript=Tb927.10.14010:mRNA | gene=Tb927.10.14010 | organism=Trypanosoma_brucei_brucei_TREU927 | gene_product=tubulin cofactor C domain-containing protein RP2 | transcript_product=tubulin cofactor C domain-containing protein RP2	11	11	11	26.1	26.1	26.1	50.631	41.404	45701000	16	1	10	0	1	3	10	0	1	3	10	0	1	3	463	21.8	0	4.3	11.2	35829000	0	1650500	8221600	0.0383044	0.915579	1	0.470539	1.38563	0.119818	20.5097	13.0048	16.0695	18.386
Tb927.11.5510	Tb927.11.5510	331	Tb927.11.5510 | transcript=Tb927.11.5510:mRNA | gene=Tb927.11.5510 | organism=Trypanosoma_brucei_brucei_TREU927 | gene_product=dynein light chain p28, axonemal, putative | transcript_product=dynein light chain p28, axonemal, putative | location=Tb9	8	8	8	41.3	41.3	41.3	27.371	39.654	45760000	13	1	8	0	1	3	8	0	1	3	8	0	1	3	235	41.3	0	6	21.3	37077000	0	1147300	7535400	0.0354387	0.92164	1	0.484415	1.39902	0.11116	21.2371	12.9553	16.2229	18.9384
Tb927.10.10630	Tb927.10.10630	111	Tb927.10.10630 | transcript=Tb927.10.10630:mRNA | gene=Tb927.10.10630 | organism=Trypanosoma_brucei_brucei_TREU927 | gene_product=hypothetical protein, conserved | transcript_product=hypothetical protein, conserved | location=Tb927_10_v5.1:2589236-	3	3	3	19.2	19.2	19.2	29.655	10.636	7188300	4	1	2	0	1	1	2	0	1	1	2	0	1	1	260	13.5	0	5.8	5.8	4705500	0	778350	1704400	0.035157	0.922238	1	-0.210244	0.864391	-0.110306	18.4655	14.8251	15.8696	17.0004
Tb927.10.7230; Tb11.v5.0615.1	Tb927.10.7230	206	Tb927.10.7230 | transcript=Tb927.10.7230:mRNA | gene=Tb927.10.7230 | organism=Trypanosoma_brucei_brucei_TREU927 | gene_product=Flagellar Member 1 | transcript_product=Flagellar Member 1 | location=Tb927_10_v5.1:1818813-1826378(-) | protein_length=2	21	21	21	14.6	14.6	14.6	284.7	90.431	115690000	35	2	20	0	3	9	20	0	3	9	20	0	3	9	2521	13.7	0	2.1	5.8	78700000	0	4375000	32616000	0.0344744	0.923689	1	0.369324	1.29175	0.108236	19.1213	12.9429	14.9523	17.8506
Tb927.11.10430	Tb927.11.10430	238	Tb927.11.10430 | transcript=Tb927.11.10430:mRNA | gene=Tb927.11.10430 | organism=Trypanosoma_brucei_brucei_TREU927 | gene_product=hypothetical protein, conserved | transcript_product=hypothetical protein, conserved | location=Tb927_11_v5.1:2778167-	7	7	7	21.1	21.1	21.1	63.675	51.171	38840000	12	1	7	0	1	3	7	0	1	3	7	0	1	3	568	21.1	0	3.2	8.3	30442000	0	1316600	7081500	0.0292193	0.934933	1	0.356835	1.28061	0.0922134	20.1047	12.7559	15.5735	18.0007
Tb927.7.2660	Tb927.7.2660	545	Tb927.7.2660 | transcript=Tb927.7.2660:mRNA | gene=Tb927.7.2660 | organism=Trypanosoma_brucei_brucei_TREU927 | gene_product=zinc finger protein family member, putative | transcript_product=zinc finger protein family member, putative | location=Tb92	3	1	1	11.1	4.2	4.2	43.757	1.9974	730270	1	1	0	1	1	3	0	0	0	1	0	0	0	1	405	0	4.7	4.7	11.1	0	0	0	730270	0.0290396	0.93532	1	0.0935297	1.06698	0.0916628	14.6724	13.8774	13.4287	15.3082
Tb927.3.1670	Tb927.3.1670	402	Tb927.3.1670 | transcript=Tb927.3.1670:mRNA | gene=Tb927.3.1670 | organism=Trypanosoma_brucei_brucei_TREU927 | gene_product=hypothetical protein, conserved | transcript_product=hypothetical protein, conserved | location=Tb927_03_v5.1:439329-442412(	7	7	7	12	12	12	112.56	33.832	28489000	12	1	7	0	2	4	7	0	2	4	7	0	2	4	1027	12	0	3.7	5.7	19992000	0	2217900	6278400	0.0287915	0.935855	1	0.252473	1.19125	0.090902	18.6091	13.261	15.4369	16.9381
Tb927.11.5000	Tb927.11.5000	326	Tb927.11.5000 | transcript=Tb927.11.5000:mRNA | gene=Tb927.11.5000 | organism=Trypanosoma_brucei_brucei_TREU927 | gene_product=Dynein intermediate chain 1, axonemal | transcript_product=Dynein intermediate chain 1, axonemal | location=Tb927_11_v5.1	5	5	5	9.9	9.9	9.9	73.293	13.865	18081000	7	1	5	0	2	3	5	0	2	3	5	0	2	3	655	9.9	0	2.9	5.3	10980000	0	995660	6105000	0.0287811	0.935877	1	0.24867	1.18811	0.0908701	18.2185	13.4112	14.7554	17.3716
Tb927.5.2250; Tb927.5.2220; Tb927.5.2190	Tb927.5.2250; Tb927.5.2220; Tb927.5.2190	495	Tb927.5.2250 | transcript=Tb927.5.2250:mRNA | gene=Tb927.5.2250 | organism=Trypanosoma_brucei_brucei_TREU927 | gene_product=META domain/Domain of unknown function (DUF1935), putative | transcript_product=META domain/Domain of unknown function (DUF1	4	4	4	17.7	17.7	17.7	48.809	59.988	28774000	10	3	4	0	1	3	4	0	1	3	4	0	1	3	446	17.7	0	4.7	11.2	21320000	0	1221300	6232500	0.0282238	0.937079	1	-0.261617	0.834152	-0.0891605	19.8221	14.4454	15.6965	18.0478
Tb927.10.650	Tb927.10.650	202	Tb927.10.650 | transcript=Tb927.10.650:mRNA | gene=Tb927.10.650 | organism=Trypanosoma_brucei_brucei_TREU927 | gene_product=Component of motile flagella 17 | transcript_product=Component of motile flagella 17 | location=Tb927_10_v5.1:173390-174052(	3	3	3	23.2	23.2	23.2	25.588	4.6523	10080000	6	1	3	0	2	1	3	0	2	1	3	0	2	1	220	23.2	0	11.4	4.5	7888400	0	1052300	1139400	0.0264571	0.940899	1	0.260371	1.19779	0.083728	19.5894	13.371	16.6832	16.7979
Tb927.7.4910; Tb11.v5.0172.1	Tb927.7.4910; Tb11.v5.0172.1	42	Tb927.7.4910 | transcript=Tb927.7.4910:mRNA | gene=Tb927.7.4910 | organism=Trypanosoma_brucei_brucei_TREU927 | gene_product=hypothetical protein, conserved | transcript_product=hypothetical protein, conserved | location=Tb927_07_v5.1:1294952-129606	18	18	18	52	52	52	40.483	170.16	186740000	33	2	18	1	2	9	18	1	2	9	18	1	2	9	369	52	6.8	5.7	38.8	129630000	1281300	4851300	50974000	0.0242186	0.945761	1	0.287119	1.2202	0.0768186	22.4263	15.7656	17.6864	21.0797
Tb927.5.4150	Tb927.5.4150	502	Tb927.5.4150 | transcript=Tb927.5.4150:mRNA | gene=Tb927.5.4150 | organism=Trypanosoma_brucei_brucei_TREU927 | gene_product=hypothetical protein, conserved | transcript_product=hypothetical protein, conserved | location=Tb927_05_v5.1:1325242-132640	13	13	13	46.9	46.9	46.9	42.589	52.675	57476000	20	1	13	0	2	5	13	0	2	5	13	0	2	5	386	46.9	0	8.3	14.5	44735000	0	1810000	10931000	0.0236912	0.94691	1	0.289066	1.22185	0.0751863	21.167	13.9285	16.5397	19.134
Tb927.8.1500	Tb927.8.1500	594	Tb927.8.1500 | transcript=Tb927.8.1500:mRNA | gene=Tb927.8.1500 | organism=Trypanosoma_brucei_brucei_TREU927 | gene_product=hypothetical protein, conserved | transcript_product=hypothetical protein, conserved | location=Tb927_08_v5.1:487358-489163(	3	3	3	8.3	8.3	8.3	63.206	33.363	34002000	14	1	1	3	1	2	1	3	1	2	1	3	1	2	601	2.5	8.3	2.5	5.7	2296700	5248600	2186700	5115700	0.0197946	0.955444	1	-0.053937	0.963304	-0.0630739	16.6718	17.8641	16.6009	17.8271
Tb927.5.4480; Tb05.5K5.130	Tb927.5.4480; Tb05.5K5.130	26	Tb927.5.4480 | transcript=Tb927.5.4480:mRNA | gene=Tb927.5.4480 | organism=Trypanosoma_brucei_brucei_TREU927 | gene_product=paraflagellar rod component par4, putative | transcript_product=paraflagellar rod component par4, putative | location=Tb927_	18	18	18	36.4	36.4	36.4	68.313	166.98	134840000	30	2	18	0	3	6	18	0	3	6	18	0	3	6	579	36.4	0	5.5	13.3	107920000	0	7485500	19436000	0.0197166	0.955616	1	-0.191542	0.875669	-0.0628303	21.6853	15.7457	17.8357	19.2123
Tb927.8.8150; Tb927.4.4190	Tb927.8.8150	647	Tb927.8.8150 | transcript=Tb927.8.8150:mRNA | gene=Tb927.8.8150 | organism=Trypanosoma_brucei_brucei_TREU927 | gene_product=C2 domain containing protein, putative | transcript_product=C2 domain containing protein, putative | location=Tb927_08_v5.1:	3	3	3	21.4	21.4	21.4	19.746	4.9989	13561000	6	2	3	0	1	1	3	0	1	1	3	0	1	1	182	21.4	0	6	6	11159000	0	1110900	1291700	0.0193816	0.956353	0.999178	0.212133	1.1584	0.0617845	20.4116	13.5482	17.0833	17.3008
Tb927.3.3490	Tb927.3.3490	416	Tb927.3.3490 | transcript=Tb927.3.3490:mRNA | gene=Tb927.3.3490 | organism=Trypanosoma_brucei_brucei_TREU927 | gene_product=High mobility group protein TDP1 | transcript_product=High mobility group protein TDP1 | location=Tb927_03_v5.1:985621-98643	8	8	8	26.2	26.2	26.2	30.866	323.31	173790000	45	1	1	5	1	5	1	5	1	5	1	5	1	5	271	5.2	21	5.2	20.3	1892300	17350000	2377200	16488000	0.018876	0.957467	0.996075	0.127807	1.09263	0.0602048	17.0443	20.2411	17.3735	20.1675
Tb927.9.1880	Tb927.9.1880	690	Tb927.9.1880 | transcript=Tb927.9.1880:mRNA | gene=Tb927.9.1880 | organism=Trypanosoma_brucei_brucei_TREU927 | gene_product=WD domain, G-beta repeat, putative | transcript_product=WD domain, G-beta repeat, putative | location=Tb927_09_v5.1:428422-4	14	14	14	42.9	42.9	42.9	63.117	52.745	59910000	21	1	13	0	2	6	13	0	2	6	13	0	2	6	569	42.2	0	7.2	20.6	46217000	0	2261000	11432000	0.0169215	0.961786	0.994402	0.193304	1.14338	0.0540822	20.8181	14.0627	16.4647	18.8027
Tb927.11.4550	Tb927.11.4550	322	Tb927.11.4550 | transcript=Tb927.11.4550:mRNA | gene=Tb927.11.4550 | organism=Trypanosoma_brucei_brucei_TREU927 | gene_product=Domain of unknown function (DUF4200), putative | transcript_product=Domain of unknown function (DUF4200), putative | loca	3	3	3	11.4	11.4	11.4	35.629	10.089	11202000	4	1	2	0	1	2	2	0	1	2	2	0	1	2	299	8.4	0	4	7	6122200	0	955560	4123900	0.0168668	0.961907	0.991333	0.109428	1.0788	0.0539105	18.5456	15.0771	15.866	17.9756
Tb927.2.4060	Tb927.2.4060	380	Tb927.2.4060 | transcript=Tb927.2.4060:mRNA | gene=Tb927.2.4060 | organism=Trypanosoma_brucei_brucei_TREU927 | gene_product=Dynein intermediate chain 138 | transcript_product=Dynein intermediate chain 138 | location=Tb927_02_v5.1:715419-718013(-) |	7	7	7	11.6	11.6	11.6	94.636	88.522	22987000	11	1	7	0	3	1	7	0	3	1	7	0	3	1	864	11.6	0	6.4	1.7	17832000	0	3767100	1387700	0.0168512	0.961942	0.988283	-0.156099	0.897448	-0.0538615	18.918	13.3036	16.6751	15.2344
Tb927.11.1150	Tb927.11.1150	252	Tb927.11.1150 | transcript=Tb927.11.1150:mRNA | gene=Tb927.11.1150 | organism=Trypanosoma_brucei_brucei_TREU927 | gene_product=radial spoke protein 3 | transcript_product=radial spoke protein 3 | location=Tb927_11_v5.1:335897-336895(+) | protein_le	7	7	7	28.9	28.9	28.9	39.377	22.385	46736000	9	1	7	0	1	1	7	0	1	1	7	0	1	1	332	28.9	0	2.4	2.4	35977000	0	3631200	7127700	0.0133368	0.969758	0.98665	0.127932	1.09273	0.0427888	20.9306	15.0306	17.6221	18.5951
Tb927.11.10540	Tb927.11.10540	239	Tb927.11.10540 | transcript=Tb927.11.10540:mRNA | gene=Tb927.11.10540 | organism=Trypanosoma_brucei_brucei_TREU927 | gene_product=hypothetical protein, conserved | transcript_product=hypothetical protein, conserved | location=Tb927_11_v5.1:2804994-	14	14	14	22.9	22.9	22.9	99.443	91.669	93229000	23	1	14	0	1	5	14	0	1	5	14	0	1	5	855	22.9	0	1.3	11.3	75959000	0	2942300	14328000	0.0101713	0.976852	0.991682	0.12599	1.09126	0.0327453	20.4782	13.1298	15.7881	18.0719
Tb927.11.4880	Tb927.11.4880	323	Tb927.11.4880 | transcript=Tb927.11.4880:mRNA | gene=Tb927.11.4880 | organism=Trypanosoma_brucei_brucei_TREU927 | gene_product=Calmodulin-binding, putative | transcript_product=Calmodulin-binding, putative | location=Tb927_11_v5.1:1397126-1397950(+	9	9	9	48.2	48.2	48.2	30.214	77.474	57594000	16	1	7	0	1	6	7	0	1	6	7	0	1	6	274	42.7	0	7.3	30.7	40278000	0	1496200	15820000	0.00616583	0.985903	0.999463	0.0708575	1.05034	0.0199382	21.6785	15.438	16.928	20.3302
Tb927.11.1960	Tb927.11.1960	295	Tb927.11.1960 | transcript=Tb927.11.1960:mRNA | gene=Tb927.11.1960 | organism=Trypanosoma_brucei_brucei_TREU927 | gene_product=leucine-rich repeat protein (LRRP), putative | transcript_product=leucine-rich repeat protein (LRRP), putative | location	6	6	6	24	24	24	42.608	65.103	16693000	10	1	6	0	1	2	6	0	1	2	6	0	1	2	392	24	0	4.1	8.4	12351000	0	1266500	3075200	0.0055628	0.987273	0.997812	-0.0481563	0.967172	-0.0180003	19.3102	14.1149	16.0245	17.3043
Tb927.8.2290	Tb927.8.2290	601	Tb927.8.2290 | transcript=Tb927.8.2290:mRNA | gene=Tb927.8.2290 | organism=Trypanosoma_brucei_brucei_TREU927 | gene_product=hypothetical protein, conserved | transcript_product=hypothetical protein, conserved | location=Tb927_08_v5.1:697189-697848(	3	3	3	23.7	23.7	23.7	23.428	24.185	14512000	6	1	3	0	2	1	3	0	2	1	3	0	2	1	219	23.7	0	11.9	7.3	9974500	0	2622800	1914800	0.00499882	0.988556	0.997818	-0.0345035	0.976368	-0.0161856	19.6649	15.4256	17.7377	17.2837
Tb927.11.17000; Tb11.v5.0404.1	Tb927.11.17000; Tb11.v5.0404.1	293	Tb927.11.17000 | transcript=Tb927.11.17000:mRNA | gene=Tb927.11.17000 | organism=Trypanosoma_brucei_brucei_TREU927 | gene_product=AIR9-like protein | transcript_product=AIR9-like protein | location=Tb927_11_v5.1:4532213-4535212(-) | protein_length=	17	17	17	25.3	25.3	25.3	109.72	70.258	63715000	31	2	15	0	2	10	15	0	2	10	15	0	2	10	999	24.2	0	3	16.2	38730000	0	2699100	22286000	0.00248131	0.994303	1	-0.0222106	0.984723	-0.00805709	19.5922	14.9965	15.7493	18.7949
Tb927.4.2640	Tb927.4.2640	456	Tb927.4.2640 | transcript=Tb927.4.2640:mRNA | gene=Tb927.4.2640 | organism=Trypanosoma_brucei_brucei_TREU927 | gene_product=hypothetical protein, conserved | transcript_product=hypothetical protein, conserved | location=Tb927_04_v5.1:697918-701742(	4	4	4	5.1	5.1	5.1	145.37	5.9873	698300000	7	1	4	0	1	1	4	0	1	1	4	0	1	1	1274	5.1	0	0.7	1.6	167720000	0	233610000	580320	0.00129178	0.99703	1	-0.0242538	0.983329	-0.00420025	21.621	13.9726	22.0991	13.446
Tb927.9.10790	Tb927.9.10790	656	Tb927.9.10790 | transcript=Tb927.9.10790:mRNA | gene=Tb927.9.10790 | organism=Trypanosoma_brucei_brucei_TREU927 | gene_product=hypothetical protein | transcript_product=hypothetical protein | location=Tb927_09_v5.1:1704864-1705781(-) | protein_leng	10	10	10	43.9	43.9	43.9	33.139	59.367	54599000	20	1	10	0	2	5	10	0	2	5	10	0	2	5	305	43.9	0	8.9	23.9	41597000	0	3406800	9594600	0.000433844	0.999002	1	0.00418377	1.0029	0.00141204	21.062	15.3276	17.4521	18.9459
Tb927.11.11680	Tb927.11.11680	253	Tb927.11.11680 | transcript=Tb927.11.11680:mRNA | gene=Tb927.11.11680 | organism=Trypanosoma_brucei_brucei_TREU927 | gene_product=2-oxoglutarate dehydrogenase E2 component, putative | transcript_product=2-oxoglutarate dehydrogenase E2 component, pu	5	5	5	18.8	18.8	18.8	41.143	13.291	15100000	8	1	3	1	1	3	3	1	1	3	3	1	1	3	383	11.7	3.1	3.1	10.2	6395200	1453100	1667200	5584800	0.000311758	0.999282	1	0.00139999	1.00097	0.00101483	18.4386	16.3008	16.499	18.2432
Tb11.v5.0470.1; Tb927.10.2430	Tb11.v5.0470.1; Tb927.10.2430	58	Tb11.v5.0470.1 | transcript=Tb11.v5.0470.1 | gene=Tb11.v5.0470 | organism=Trypanosoma_brucei_brucei_TREU927 | gene_product=receptor-type adenylate cyclase GRESAG 4, putative | transcript_product=receptor-type adenylate cyclase GRESAG 4, putative | locat	10	3	3	4.4	1.4	1.4	95.826	8.3296	127880000	5	2	0	0	1	1	0	0	0	0	0	0	0	0	862	0	0	2.8	2.8	0	0	0	0	NaN	#VALUE!	1	0	1	NaN	15.2511	14.2543	12.6618	13.3396
Tb927.4.4410	Tb927.4.4410	469	Tb927.4.4410 | transcript=Tb927.4.4410:mRNA | gene=Tb927.4.4410 | organism=Trypanosoma_brucei_brucei_TREU927 | gene_product=adenylyl cyclase | transcript_product=adenylyl cyclase | location=Tb927_04_v5.1:1168174-1171908(-) | protein_length=1244 | s	69	1	1	43.7	0.9	0.9	138.25	1.7965	2380200	2	1	0	0	5	8	0	0	0	0	0	0	0	0	1244	0	0	7.5	10.5	0	0	0	0	NaN	#VALUE!	1	0	1	NaN	13.0687	12.6441	13.187	14.4787
Tb927.4.4440	Tb927.4.4440	471	Tb927.4.4440 | transcript=Tb927.4.4440:mRNA | gene=Tb927.4.4440 | organism=Trypanosoma_brucei_brucei_TREU927 | gene_product=adenylyl cyclase | transcript_product=adenylyl cyclase | location=Tb927_04_v5.1:1182723-1186466(-) | protein_length=1247 | s	70	8	0	44.1	6.2	0	138.7	34.278	150020000	16	1	0	0	4	8	0	0	0	0	0	0	0	0	1247	0	0	5.5	10.5	0	0	0	0	NaN	#VALUE!	1	0	1	NaN	14.0382	13.7475	12.506	11.9097
Tb927.4.4460	Tb927.4.4460	472	Tb927.4.4460 | transcript=Tb927.4.4460:mRNA | gene=Tb927.4.4460 | organism=Trypanosoma_brucei_brucei_TREU927 | gene_product=adenylyl cyclase | transcript_product=adenylyl cyclase | location=Tb927_04_v5.1:1191876-1195742(-) | protein_length=1288 | s	56	6	2	36.7	5	2.1	144.26	65.051	100340000	9	1	0	0	4	8	0	0	0	0	0	0	0	0	1288	0	0	5.3	10.2	0	0	0	0	NaN	#VALUE!	1	0	1	NaN	15.5126	13.7705	13.6195	13.2459
Tb927.4.4470; Tb927.5.650; Tb927.5.1450	Tb927.4.4470	473	Tb927.4.4470 | transcript=Tb927.4.4470:mRNA | gene=Tb927.4.4470 | organism=Trypanosoma_brucei_brucei_TREU927 | gene_product=adenylyl cyclase | transcript_product=adenylyl cyclase | location=Tb927_04_v5.1:1196301-1200116(-) | protein_length=1271 | s	52	5	2	38.1	6.8	3.5	141.96	33.601	80167000	9	3	0	0	4	7	0	0	0	0	0	0	0	0	1271	0	0	5.4	9.2	0	0	0	0	NaN	#VALUE!	1	0	1	NaN	15.5852	14.3193	12.7623	11.3636
Tb927.6.280; Tb927.6.330	Tb927.6.280; Tb927.6.330	513	Tb927.6.280 | transcript=Tb927.6.280:mRNA | gene=Tb927.6.280 | organism=Trypanosoma_brucei_brucei_TREU927 | gene_product=receptor-type adenylate cyclase GRESAG 4, putative | transcript_product=receptor-type adenylate cyclase GRESAG 4, putative | lo	16	3	1	8	2.7	1.3	140.63	16.798	14073000	5	2	0	0	1	2	0	0	0	0	0	0	0	0	1268	0	0	1.9	2.4	0	0	0	0	NaN	#VALUE!	1	0	1	NaN	13.938	14.0371	13.8381	14.645
Tb927.6.310	Tb927.6.310	515	Tb927.6.310 | transcript=Tb927.6.310:mRNA | gene=Tb927.6.310 | organism=Trypanosoma_brucei_brucei_TREU927 | gene_product=receptor-type adenylate cyclase GRESAG 4, putative | transcript_product=receptor-type adenylate cyclase GRESAG 4, putative | lo	14	1	1	6.2	0.6	0.6	140.37	4.8635	111360000	2	1	0	0	1	2	0	0	0	0	0	0	0	0	1272	0	0	1.9	2.4	0	0	0	0	NaN	#VALUE!	1	0	1	NaN	13.783	14.8731	12.9086	13.6716
Tb927.7.6040; Tb927.7.6060; Tb927.7.6050; Tb927.7.6080	Tb927.7.6040; Tb927.7.6060; Tb927.7.6050; Tb927.7.6080	574	Tb927.7.6040 | transcript=Tb927.7.6040:mRNA | gene=Tb927.7.6040 | organism=Trypanosoma_brucei_brucei_TREU927 | gene_product=receptor-type adenylate cyclase GRESAG 4, putative | transcript_product=receptor-type adenylate cyclase GRESAG 4, putative |	10	5	1	8.4	4.9	2.2	139.46	12.094	9449900	4	4	0	0	1	2	0	0	0	0	0	0	0	0	1267	0	0	1.1	2	0	0	0	0	NaN	#VALUE!	1	0	1	NaN	14.8023	14.5005	12.8833	13.0991
Tb927.7.7520	Tb927.7.7520	587	Tb927.7.7520 | transcript=Tb927.7.7520:mRNA | gene=Tb927.7.7520 | organism=Trypanosoma_brucei_brucei_TREU927 | gene_product=receptor-type adenylate cyclase GRESAG 4, putative | transcript_product=receptor-type adenylate cyclase GRESAG 4, putative |	64	32	0	39.7	26.6	0	137.88	132.71	867350000	48	1	0	0	2	4	0	0	0	0	0	0	0	0	1243	0	0	2.8	5.2	0	0	0	0	NaN	#VALUE!	1	0	1	NaN	13.1199	15.3848	14.0342	13.0839
Tb927.7.7530	Tb927.7.7530	588	Tb927.7.7530 | transcript=Tb927.7.7530:mRNA | gene=Tb927.7.7530 | organism=Trypanosoma_brucei_brucei_TREU927 | gene_product=receptor-type adenylate cyclase GRESAG 4, putative | transcript_product=receptor-type adenylate cyclase GRESAG 4, putative |	61	1	1	40.7	1.4	1.4	138.01	115.49	27870000	3	1	0	0	1	3	0	0	0	0	0	0	0	0	1243	0	0	0.9	3.3	0	0	0	0	NaN	#VALUE!	1	0	1	NaN	14.6014	14.9793	13.759	13.0914
Tb927.8.7910	Tb927.8.7910	642	Tb927.8.7910 | transcript=Tb927.8.7910 | gene=Tb927.8.7910 | organism=Trypanosoma_brucei_brucei_TREU927 | gene_product=receptor-type adenylate cyclase GRESAG 4, frameshift | transcript_product=receptor-type	25	1	1	23.3	1.4	1.4	128.32	2.216	55103000	2	1	0	0	1	1	0	0	0	0	0	0	0	0	1184	0	0	0.9	0.9	0	0	0	0	NaN	#VALUE!	1	0	1	NaN	13.3666	13.6045	14.546	14.687
Tb927.8.7920	Tb927.8.7920	643	Tb927.8.7920 | transcript=Tb927.8.7920:mRNA | gene=Tb927.8.7920 | organism=Trypanosoma_brucei_brucei_TREU927 | gene_product=receptor-type adenylate cyclase GRESAG 4, putative | transcript_product=receptor-type adenylate cyclase GRESAG 4, putative |	38	10	1	28.9	10.6	0.9	140.55	32.957	108020000	15	1	0	0	1	1	0	0	0	0	0	0	0	0	1264	0	0	0.9	0.9	0	0	0	0	NaN	#VALUE!	1	0	1	NaN	14.1801	14.3931	13.1443	13.1592
Tb927.8.7930	Tb927.8.7930	644	Tb927.8.7930 | transcript=Tb927.8.7930:mRNA | gene=Tb927.8.7930 | organism=Trypanosoma_brucei_brucei_TREU927 | gene_product=receptor-type adenylate cyclase GRESAG 4, putative | transcript_product=receptor-type adenylate cyclase GRESAG 4, putative |	38	5	0	31.6	5.2	0	140.94	42.249	89421000	8	1	0	0	1	2	0	0	0	0	0	0	0	0	1267	0	0	0.9	2	0	0	0	0	NaN	#VALUE!	1	0	1	NaN	13.8679	13.8462	13.1315	13.9911
Tb927.8.7940; Tb11.v5.0821.1	Tb927.8.7940	645	Tb927.8.7940 | transcript=Tb927.8.7940:mRNA | gene=Tb927.8.7940 | organism=Trypanosoma_brucei_brucei_TREU927 | gene_product=receptor-type adenylate cyclase GRESAG 4, putative | transcript_product=receptor-type adenylate cyclase GRESAG 4, putative |	50	41	17	31	27.5	10.5	138.49	323.31	865910000	78	2	0	0	2	2	0	0	0	0	0	0	0	0	1250	0	0	2.8	2.8	0	0	0	0	NaN	#VALUE!	1	0	1	NaN	15.0509	13.6902	14.697	12.7791
Tb927.2.2670	Tb927.2.2670	376	Tb927.2.2670 | transcript=Tb927.2.2670:mRNA | gene=Tb927.2.2670 | organism=Trypanosoma_brucei_brucei_TREU927 | gene_product=histone H4 variant | transcript_product=histone H4 variant | location=Tb927_02_v5.1:531130-531432(+) | protein_length=100 |	5	1	1	27	12	12	11.253	12.525	0	1	1	3	2	4	5	0	0	0	1	0	0	0	1	100	15	14	15	27	0	0	0	0	NaN	#VALUE!	1	0	1	NaN	14.8667	14.5124	12.987	12.9457
