# Supplementary material for: A multi-adenylate cyclase regulator at the flagellar tip controls African trypanosome transmission
Source: Research Square preprint supplement (doi:10.21203/rs.3.rs-1216579/v1), 2022-01-25
Supplement: Supplementary file 4 [file c7241d5231707d1c7f6e94ec.xlsx]

## Sheet: CARP3RNAi_BSF
Supplementary Table 5. Quantitative proteomics upon CARP3 knock down
Label-free quantitative proteomics upon tetracycline-induced CARP3 knock down (5 µg/ml Tet, 24h) versus uninduced. Significance was determined in Perseus with a two-sided Student's t-test, p-value ≤ 0.05, s0 = 0.1.
Green: proteins with significantly altered abundance upon CARP3 RNAi compared to non-induced.
Significant	-log10 p value	p value	Difference	fold change	Protein IDs	Majority protein IDs	Fasta headers	Protein Name	Gene Name	Peptides	Razor + unique peptides	Unique peptides	Sequence coverage [%]	Unique + razor sequence coverage [%]	Unique sequence coverage [%]	Mol. weight [kDa]	Q-value	Score	Intensity	MS/MS count	Peptides 2i	Peptides 2u	Peptides 3i	Peptides 3u	Peptides 4i	Peptides 4u	Peptides 5i	Peptides 5u	Razor + unique peptides 2i	Razor + unique peptides 2u	Razor + unique peptides 3i	Razor + unique peptides 3u	Razor + unique peptides 4i	Razor + unique peptides 4u	Razor + unique peptides 5i	Razor + unique peptides 5u	Unique peptides 2i	Unique peptides 2u	Unique peptides 3i	Unique peptides 3u	Unique peptides 4i	Unique peptides 4u	Unique peptides 5i	Unique peptides 5u	Sequence length	Sequence lengths	Sequence coverage 2i [%]	Sequence coverage 2u [%]	Sequence coverage 3i [%]
+	7.05638	8.78247e-08	-1.21653	0.430317	Tb927.8.7930:mRNA-p1	Tb927.8.7930:mRNA-p1	Tb927.8.7930:mRNA-p1 | transcript=Tb927.8.7930:mRNA | gene=Tb927.8.7930 | organism=Trypanosoma_brucei_brucei_TREU927 | gene_product=receptor-type adenylate cyclase GRESAG 4, putative | transcript_product=receptor-type adenylate cyclase GRESAG 4, putative |	receptor-type adenylate cyclase GRESAG 4	Tb927.8.7930	10	6	0	11	7.2	0	140.94	0	20.762	68191000	21	6	9	7	8	7	8	5	9	3	6	3	5	4	5	2	5	0	0	0	0	0	0	0	0	1267	1267	7.5	10.2	6.2
+	4.65314	2.22262e-05	-3.6551	0.079379	Tb927.7.5340:mRNA-p1	Tb927.7.5340:mRNA-p1	Tb927.7.5340:mRNA-p1 | transcript=Tb927.7.5340:mRNA | gene=Tb927.7.5340 | organism=Trypanosoma_brucei_brucei_TREU927 | gene_product=cAMP response protein 3 | transcript_product=cAMP response protein 3 | location=Tb927_07_v5.1:1419326-1420822(+) | protein_l	cAMP response protein 3	Tb927.7.5340	12	12	12	26.3	26.3	26.3	56.822	0	34.395	253650000	41	4	12	3	10	3	11	3	11	4	12	3	10	3	11	3	11	4	12	3	10	3	11	3	11	498	498	8.4	26.3	6.2
+	3.3655	0.000431018	-1.72668	0.302147	Tb927.8.7590:mRNA-p1;Tb11.v5.0821.1-p1	Tb927.8.7590:mRNA-p1;Tb11.v5.0821.1-p1	Tb927.8.7590:mRNA-p1 | transcript=Tb927.8.7590:mRNA | gene=Tb927.8.7590 | organism=Trypanosoma_brucei_brucei_TREU927 | gene_product=receptor-type adenylate cyclase GRESAG 4, putative | transcript_product=receptor-type adenylate cyclase GRESAG 4, putative |	receptor-type adenylate cyclase GRESAG 4	Tb927.8.7590	6	1	1	4.8	1	1	139.52	0.0080037	1.1814	11831000	3	3	5	5	5	5	5	4	6	1	1	1	1	1	1	1	1	1	1	1	1	1	1	1	1	1267	NaN	2.5	3.9	4.1
+	3.24278	0.000571773	-0.990065	0.503455	Tb927.10.16190:mRNA-p1;Tb927.11.17040:mRNA-p1	Tb927.10.16190:mRNA-p1;Tb927.11.17040:mRNA-p1	Tb927.10.16190:mRNA-p1 | transcript=Tb927.10.16190:mRNA | gene=Tb927.10.16190 | organism=Trypanosoma_brucei_brucei_TREU927 | gene_product=procyclic-enriched flagellar receptor adenylate cyclase 2 | transcript_product=procyclic-enriched flagellar receptor a	procyclic-enriched flagellar receptor adenylate cyclase 2	Tb927.10.16190	4	4	4	4	4	4	137.9	0	6.9281	155550000	19	4	3	3	4	4	4	3	4	4	3	3	4	4	4	3	4	4	3	3	4	4	4	3	4	1254	NaN	4	3.2	2.6
+	3.02633	0.000941176	-0.729461	0.603129	Tb927.7.7530:mRNA-p1;Tb927.7.7520:mRNA-p1	Tb927.7.7530:mRNA-p1;Tb927.7.7520:mRNA-p1	Tb927.7.7530:mRNA-p1 | transcript=Tb927.7.7530:mRNA | gene=Tb927.7.7530 | organism=Trypanosoma_brucei_brucei_TREU927 | gene_product=receptor-type adenylate cyclase GRESAG 4, putative | transcript_product=receptor-type adenylate cyclase GRESAG 4, putative |	receptor-type adenylate cyclase GRESAG 4	Tb927.7.7530	16	7	7	17.4	7.6	7.6	138.01	0	20.378	182440000	22	14	14	14	15	13	14	14	15	6	7	5	7	6	7	7	7	6	7	5	7	6	7	7	7	1243	NaN	14.9	15.9	15.4
+	2.87494	0.0013337	-1.99673	0.250566	Tb927.8.7940:mRNA-p1	Tb927.8.7940:mRNA-p1	Tb927.8.7940:mRNA-p1 | transcript=Tb927.8.7940:mRNA | gene=Tb927.8.7940 | organism=Trypanosoma_brucei_brucei_TREU927 | gene_product=receptor-type adenylate cyclase GRESAG 4, putative | transcript_product=receptor-type adenylate cyclase GRESAG 4, putative |	receptor-type adenylate cyclase GRESAG 4	Tb927.8.7940	9	2	2	10.2	2.4	2.4	138.49	0	6.5161	40326000	7	4	8	5	7	6	7	4	8	0	2	0	2	1	2	1	2	0	2	0	2	1	2	1	2	1250	1250	5.4	9.3	4.2
	3.63314	0.000232733	-0.324209	0.798736	Tb927.8.3540:mRNA-p1	Tb927.8.3540:mRNA-p1	Tb927.8.3540:mRNA-p1 | transcript=Tb927.8.3540:mRNA | gene=Tb927.8.3540 | organism=Trypanosoma_brucei_brucei_TREU927 | gene_product=hypothetical protein, conserved | transcript_product=hypothetical protein, conserved | location=Tb927_08_v5.1:1059272-106217	hypothetical protein	Tb927.8.3540	4	4	4	4.3	4.3	4.3	105.84	0.00025381	2.7355	33074000	6	3	2	2	4	2	2	3	3	3	2	2	4	2	2	3	3	3	2	2	4	2	2	3	3	968	968	3.1	2.4	2.1
	3.5373	0.000290199	0.0683093	1.04849	Tb927.11.2400:mRNA-p1	Tb927.11.2400:mRNA-p1	Tb927.11.2400:mRNA-p1 | transcript=Tb927.11.2400:mRNA | gene=Tb927.11.2400 | organism=Trypanosoma_brucei_brucei_TREU927 | gene_product=Flabarin-like protein | transcript_product=Flabarin-like protein | location=Tb927_11_v5.1:688369-689025(+) | protein_leng	Flabarin-like protein	Tb927.11.2400	9	9	9	54.1	54.1	54.1	24.436	0	119.89	3573300000	138	9	9	9	9	9	9	9	9	9	9	9	9	9	9	9	9	9	9	9	9	9	9	9	9	218	218	54.1	54.1	54.1
	2.83432	0.00146446	-0.231074	0.852	Tb927.10.1560:mRNA-p1	Tb927.10.1560:mRNA-p1	Tb927.10.1560:mRNA-p1 | transcript=Tb927.10.1560:mRNA | gene=Tb927.10.1560 | organism=Trypanosoma_brucei_brucei_TREU927 | gene_product=Nucleolar protein 91 | transcript_product=Nucleolar protein 91 | location=Tb927_10_v5.1:428589-431072(-) | protein_length	Nucleolar protein 91	Tb927.10.1560	12	12	12	18.1	18.1	18.1	91.596	0	29.511	7438400000	63	11	11	11	11	11	12	11	12	11	11	11	11	11	12	11	12	11	11	11	11	11	12	11	12	827	827	16.7	16.7	16.7
	2.68948	0.00204418	0.281236	1.21524	Tb927.7.190:mRNA-p1	Tb927.7.190:mRNA-p1	Tb927.7.190:mRNA-p1 | transcript=Tb927.7.190:mRNA | gene=Tb927.7.190 | organism=Trypanosoma_brucei_brucei_TREU927 | gene_product=thimet oligopeptidase, putative | transcript_product=thimet oligopeptidase, putative | location=Tb927_07_v5.1:34206-36263(+) |	thimet oligopeptidase	Tb927.7.190	28	28	28	48.8	48.8	48.8	77.472	0	86.719	1197200000	142	26	25	25	24	25	26	25	22	26	25	25	24	25	26	25	22	26	25	25	24	25	26	25	22	685	685	47.2	41.9	41.9
	2.66117	0.00218187	0.0973144	1.06978	Tb927.9.7520:mRNA-p1	Tb927.9.7520:mRNA-p1	Tb927.9.7520:mRNA-p1 | transcript=Tb927.9.7520:mRNA | gene=Tb927.9.7520 | organism=Trypanosoma_brucei_brucei_TREU927 | gene_product=hypothetical protein, conserved | transcript_product=hypothetical protein, conserved | location=Tb927_09_v5.1:1234752-123579	hypothetical protein	Tb927.9.7520	25	25	25	82.7	82.7	82.7	38.016	0	238.41	11178000000	301	24	25	24	24	23	24	22	22	24	25	24	24	23	24	22	22	24	25	24	24	23	24	22	22	346	346	80.6	82.7	80.6
	2.65418	0.00221726	-0.453785	0.730125	Tb927.7.7230:mRNA-p1	Tb927.7.7230:mRNA-p1	Tb927.7.7230:mRNA-p1 | transcript=Tb927.7.7230:mRNA | gene=Tb927.7.7230 | organism=Trypanosoma_brucei_brucei_TREU927 | gene_product=nitroreductase | transcript_product=nitroreductase | location=Tb927_07_v5.1:2083473-2084435(-) | protein_length=320 | sequen	nitroreductase	Tb927.7.7230	4	4	4	22.8	22.8	22.8	35.522	0	11.41	98218000	3	3	4	3	4	4	3	4	3	3	4	3	4	4	3	4	3	3	4	3	4	4	3	4	3	320	320	15.3	22.8	18.4
	2.55358	0.00279526	0.296544	1.2282	Tb927.4.4850:mRNA-p1;Tb927.4.4830:mRNA-p1;Tb927.4.4870:mRNA-p1;Tb11.v5.0541.1-p1	Tb927.4.4850:mRNA-p1;Tb927.4.4830:mRNA-p1;Tb927.4.4870:mRNA-p1	Tb927.4.4850:mRNA-p1 | transcript=Tb927.4.4850:mRNA | gene=Tb927.4.4850 | organism=Trypanosoma_brucei_brucei_TREU927 | gene_product=amino acid transporter, putative | transcript_product=amino acid transporter, putative | location=Tb927_04_v5.1:1325309-1326	amino acid transporter	Tb927.4.4850	5	5	5	12.9	12.9	12.9	48.013	0	16.502	602730000	30	5	5	5	5	5	5	5	5	5	5	5	5	5	5	5	5	5	5	5	5	5	5	5	5	450	NaN	12.9	12.9	12.9
	2.49927	0.00316762	0.18339	1.13555	Tb927.8.7970:mRNA-p1	Tb927.8.7970:mRNA-p1	Tb927.8.7970:mRNA-p1 | transcript=Tb927.8.7970:mRNA | gene=Tb927.8.7970 | organism=Trypanosoma_brucei_brucei_TREU927 | gene_product=hypothetical protein | transcript_product=hypothetical protein | location=Tb927_08_v5.1:2347985-2349469(+) | protein_length=	hypothetical protein	Tb927.8.7970	11	11	11	40.1	40.1	40.1	53.211	0	75.862	1127800000	90	10	9	9	11	11	10	10	10	10	9	9	11	11	10	10	10	10	9	9	11	11	10	10	10	494	494	38.3	34.2	34.2
	2.49674	0.00318613	-0.29103	0.817318	Tb927.10.7050:mRNA-p1	Tb927.10.7050:mRNA-p1	Tb927.10.7050:mRNA-p1 | transcript=Tb927.10.7050:mRNA | gene=Tb927.10.7050 | organism=Trypanosoma_brucei_brucei_TREU927 | gene_product=chromatin assembly factor 1 subunit B, putative | transcript_product=chromatin assembly factor 1 subunit B, putative | lo	chromatin assembly factor 1 subunit B	Tb927.10.7050	4	4	4	9.8	9.8	9.8	60.344	0	6.6944	35329000	14	4	3	4	4	4	4	4	4	4	3	4	4	4	4	4	4	4	3	4	4	4	4	4	4	550	550	9.8	7.1	9.8
	2.49172	0.00322311	-0.288161	0.818945	Tb927.4.3140:mRNA-p1	Tb927.4.3140:mRNA-p1	Tb927.4.3140:mRNA-p1 | transcript=Tb927.4.3140:mRNA | gene=Tb927.4.3140 | organism=Trypanosoma_brucei_brucei_TREU927 | gene_product=Ribosome maturation protein SDO1 | transcript_product=Ribosome maturation protein SDO1 | location=Tb927_04_v5.1:825953-82735	Ribosome maturation protein SDO1	Tb927.4.3140	7	7	7	16.9	16.9	16.9	51.815	0	17.701	115840000	20	6	4	6	5	5	7	6	5	6	4	6	5	5	7	6	5	6	4	6	5	5	7	6	5	468	468	15.4	13	16.7
	2.45253	0.00352755	0.335982	1.26224	Tb927.9.4200:mRNA-p1	Tb927.9.4200:mRNA-p1	Tb927.9.4200:mRNA-p1 | transcript=Tb927.9.4200:mRNA | gene=Tb927.9.4200 | organism=Trypanosoma_brucei_brucei_TREU927 | gene_product=fatty acyl CoA synthetase 2 | transcript_product=fatty acyl CoA synthetase 2 | location=Tb927_09_v5.1:794396-796522(+) | pro	fatty acyl CoA synthetase 2	Tb927.9.4200	18	11	11	28.4	18.5	18.5	79.586	0	32.568	277090000	58	17	16	18	17	18	16	18	17	11	11	11	11	11	11	11	11	11	11	11	11	11	11	11	11	708	708	28.4	25.8	28.4
	2.40358	0.00394839	-0.0909781	0.938886	Tb927.2.2120:mRNA-p1	Tb927.2.2120:mRNA-p1	Tb927.2.2120:mRNA-p1 | transcript=Tb927.2.2120:mRNA | gene=Tb927.2.2120 | organism=Trypanosoma_brucei_brucei_TREU927 | gene_product=Serine/threonine-protein kinase NEK22, putative | transcript_product=Serine/threonine-protein kinase NEK22, putative | locat	Serine/threonine-protein kinase NEK22	Tb927.2.2120	12	12	12	36.4	36.4	36.4	50.602	0	102.4	767390000	73	11	10	10	10	12	12	12	11	11	10	10	10	12	12	12	11	11	10	10	10	12	12	12	11	453	453	34.2	34.2	34.2
	2.38331	0.004137	-0.408251	0.753536	Tb927.8.2910:mRNA-p1	Tb927.8.2910:mRNA-p1	Tb927.8.2910:mRNA-p1 | transcript=Tb927.8.2910:mRNA | gene=Tb927.8.2910 | organism=Trypanosoma_brucei_brucei_TREU927 | gene_product=ER degradation-enhancing alpha-mannosidase-like protein 1, putative | transcript_product=ER degradation-enhancing alpha-mann	ER degradation-enhancing alpha-mannosidase-like protein 1	Tb927.8.2910	12	2	1	31.3	6.6	3.2	65.812	0	24.102	146850000	17	10	11	12	10	9	10	10	12	2	2	2	2	2	2	2	2	1	1	1	1	1	1	1	1	588	588	28.4	29.8	31.3
	2.36659	0.00429947	-0.144754	0.904533	Tb927.11.6740:mRNA-p1	Tb927.11.6740:mRNA-p1	Tb927.11.6740:mRNA-p1 | transcript=Tb927.11.6740:mRNA | gene=Tb927.11.6740 | organism=Trypanosoma_brucei_brucei_TREU927 | gene_product=pumilio/PUF RNA binding protein 10, putative | transcript_product=pumilio/PUF RNA binding protein 10, putative | location	pumilio/PUF RNA binding protein 10	Tb927.11.6740	13	13	13	26.4	26.4	26.4	75.167	0	42.1	413850000	61	13	13	12	13	13	13	12	11	13	13	12	13	13	13	12	11	13	13	12	13	13	13	12	11	683	683	26.4	26.4	23.9
	2.33678	0.00460487	-0.283565	0.821559	Tb927.5.530:mRNA-p1	Tb927.5.530:mRNA-p1	Tb927.5.530:mRNA-p1 | transcript=Tb927.5.530:mRNA | gene=Tb927.5.530 | organism=Trypanosoma_brucei_brucei_TREU927 | gene_product=hypothetical protein, conserved | transcript_product=hypothetical protein, conserved | location=Tb927_05_v5.1:224348-226333(-)	hypothetical protein	Tb927.5.530	3	3	3	6.8	6.8	6.8	71.4	0	9.6314	63448000	16	3	3	3	3	3	3	3	3	3	3	3	3	3	3	3	3	3	3	3	3	3	3	3	3	661	661	6.8	6.8	6.8
	2.33241	0.00465151	-0.234605	0.849917	Tb927.1.1730:mRNA-p1	Tb927.1.1730:mRNA-p1	Tb927.1.1730:mRNA-p1 | transcript=Tb927.1.1730:mRNA | gene=Tb927.1.1730 | organism=Trypanosoma_brucei_brucei_TREU927 | gene_product=Polyadenylation mediator complex protein PAMC1, putative | transcript_product=Polyadenylation mediator complex protein PAMC1	Polyadenylation mediator complex protein PAMC1	Tb927.1.1730	6	6	6	12.8	12.8	12.8	75.065	0	16.56	196590000	21	5	5	5	6	5	5	5	5	5	5	5	6	5	5	5	5	5	5	5	6	5	5	5	5	693	693	10.8	10.4	10.4
	2.33159	0.00466029	-0.0743995	0.949737	Tb927.11.12410:mRNA-p1	Tb927.11.12410:mRNA-p1	Tb927.11.12410:mRNA-p1 | transcript=Tb927.11.12410:mRNA | gene=Tb927.11.12410 | organism=Trypanosoma_brucei_brucei_TREU927 | gene_product=kinetoplastid kinetochore protein 10 | transcript_product=kinetoplastid kinetochore protein 10 | location=Tb927_11_v5.	kinetoplastid kinetochore protein 10	Tb927.11.12410	15	15	5	38.9	38.9	12.9	53.169	0	55.987	1602800000	122	14	13	14	14	13	14	14	14	14	13	14	14	13	14	14	14	5	5	5	5	5	5	5	5	465	465	36.1	32.9	36.1
	2.33093	0.00466731	-0.284886	0.820806	Tb927.4.4430:mRNA-p1;Tb927.4.4450:mRNA-p1;Tb927.6.170:mRNA-p1;Tb927.6.180:mRNA-p1;Tb11.v5.0456.1-p1;Tb927.7.7470:mRNA-p1;Tb927.11.13740:mRNA-p1;Tb927.6.190:mRNA-p1;Tb11.v5.0546.1-p1;Tb927.6.200:mRNA-p1;Tb927.6.780:mRNA-p1;Tb927.5.1450:mRNA-p1;Tb927.6.800:mRNA-p1;Tb05.5K5.190:mRNA-p1;Tb05.5K5.180:mRNA-p1;Tb927.5.4540:mRNA-p1;Tb927.6.310:mRNA-p1;Tb11.v5.0425.1-p1;Tb927.5.4550:mRNA-p1;Tb927.6.790:mR…	Tb927.4.4430:mRNA-p1;Tb927.4.4450:mRNA-p1	Tb927.4.4430:mRNA-p1 | transcript=Tb927.4.4430:mRNA | gene=Tb927.4.4430 | organism=Trypanosoma_brucei_brucei_TREU927 | gene_product=adenylyl cyclase | transcript_product=adenylyl cyclase | location=Tb927_04_v5.1:1177872-1181603(-) | protein_length=1243 | s	adenylyl cyclase	Tb927.4.4430	24	24	2	30.9	30.9	3.8	138.27	0	81.327	1142900000	108	19	21	22	21	19	22	21	23	19	21	22	21	19	22	21	23	1	2	2	2	1	2	2	2	1243	NaN	25	28.8	28.8
	2.24414	0.00569975	0.272347	1.20777	Tb06.3A7.960:mRNA-p1	Tb06.3A7.960:mRNA-p1	Tb06.3A7.960:mRNA-p1 | transcript=Tb06.3A7.960:mRNA | gene=Tb06.3A7.960 | organism=Trypanosoma_brucei_brucei_TREU927 | gene_product=hypothetical protein | transcript_product=hypothetical protein | location=Tb927_06_v5.1:484320-485252(+) | protein_length=31	hypothetical protein	Tb06.3A7.960	4	4	4	15.2	15.2	15.2	34.146	0	10.72	124120000	17	4	4	4	3	3	4	4	2	4	4	4	3	3	4	4	2	4	4	4	3	3	4	4	2	310	310	15.2	15.2	15.2
	2.23998	0.0057547	0.120622	1.0872	Tb927.10.8000:mRNA-p1	Tb927.10.8000:mRNA-p1	Tb927.10.8000:mRNA-p1 | transcript=Tb927.10.8000:mRNA | gene=Tb927.10.8000 | organism=Trypanosoma_brucei_brucei_TREU927 | gene_product=hypothetical protein, conserved | transcript_product=hypothetical protein, conserved | location=Tb927_10_v5.1:1991925-199	hypothetical protein	Tb927.10.8000	21	21	21	25.3	25.3	25.3	151.01	0	80.025	598530000	81	20	19	20	19	18	17	19	20	20	19	20	19	18	17	19	20	20	19	20	19	18	17	19	20	1329	1329	24.5	20.4	23.9
	2.23376	0.00583767	-0.351835	0.783587	Tb927.9.14410:mRNA-p1	Tb927.9.14410:mRNA-p1	Tb927.9.14410:mRNA-p1 | transcript=Tb927.9.14410:mRNA | gene=Tb927.9.14410 | organism=Trypanosoma_brucei_brucei_TREU927 | gene_product=RNA 3-terminal phosphate cyclase, putative | transcript_product=RNA 3-terminal phosphate cyclase, putative | location=T	RNA 3-terminal phosphate cyclase	Tb927.9.14410	2	2	2	9.7	9.7	9.7	39.228	0	4.8097	34492000	11	2	2	2	2	1	2	2	2	2	2	2	2	1	2	2	2	2	2	2	2	1	2	2	2	362	362	9.7	9.7	9.7
	2.2029	0.00626761	0.247521	1.18717	Tb927.5.4260:mRNA-p1;Tb927.5.4250:mRNA-p1;Tb927.5.4240:mRNA-p1;Tb927.5.4230:mRNA-p1;Tb927.5.4220:mRNA-p1;Tb927.5.4210:mRNA-p1;Tb927.5.4200:mRNA-p1;Tb927.5.4190:mRNA-p1;Tb927.5.4180:mRNA-p1;Tb927.5.4170:mRNA-p1	Tb927.5.4260:mRNA-p1;Tb927.5.4250:mRNA-p1;Tb927.5.4240:mRNA-p1;Tb927.5.4230:mRNA-p1;Tb927.5.4220:mRNA-p1;Tb927.5.4210:mRNA-p1;Tb927.5.4200:mRNA-p1;Tb927.5.4190:mRNA-p1;Tb927.5.4180:mRNA-p1;Tb927.5.4170:mRNA-p1	Tb927.5.4260:mRNA-p1 | transcript=Tb927.5.4260:mRNA | gene=Tb927.5.4260 | organism=Trypanosoma_brucei_brucei_TREU927 | gene_product=histone H4, putative | transcript_product=histone H4, putative | location=Tb927_05_v5.1:1334708-1335010(-) | protein_length=	histone H4	Tb927.5.4260	8	8	5	48	48	33	11.142	0	26.12	15260000000	99	7	8	7	8	7	8	8	7	7	8	7	8	7	8	8	7	4	5	5	5	4	5	5	4	100	NaN	46	48	44
	2.18504	0.00653069	0.0525866	1.03712	Tb927.3.1790:mRNA-p1	Tb927.3.1790:mRNA-p1	Tb927.3.1790:mRNA-p1 | transcript=Tb927.3.1790:mRNA | gene=Tb927.3.1790 | organism=Trypanosoma_brucei_brucei_TREU927 | gene_product=pyruvate dehydrogenase E1 beta subunit, putative | transcript_product=pyruvate dehydrogenase E1 beta subunit, putative | loc	pyruvate dehydrogenase E1 beta subunit	Tb927.3.1790	15	15	15	64.4	64.4	64.4	37.566	0	233.23	2626300000	185	14	15	14	13	14	14	13	14	14	15	14	13	14	14	13	14	14	15	14	13	14	14	13	14	348	348	62.1	64.4	61.8
	2.18174	0.00658054	0.108725	1.07827	Tb927.5.1390:mRNA-p1	Tb927.5.1390:mRNA-p1	Tb927.5.1390:mRNA-p1 | transcript=Tb927.5.1390:mRNA | gene=Tb927.5.1390 | organism=Trypanosoma_brucei_brucei_TREU927 | gene_product=64 kDa invariant surface glycoprotein | transcript_product=64 kDa invariant surface glycoprotein | location=Tb927_05_v5.1:50	64 kDa invariant surface glycoprotein	Tb927.5.1390	10	3	3	20	7.1	7.1	46.842	0	3.3653	67050000	8	10	7	9	9	7	7	9	8	3	2	2	2	1	2	2	2	3	2	2	2	1	2	2	2	434	434	20	13.4	17.1
	2.17008	0.00675964	-0.178403	0.883681	Tb927.6.2850:mRNA-p1	Tb927.6.2850:mRNA-p1	Tb927.6.2850:mRNA-p1 | transcript=Tb927.6.2850:mRNA | gene=Tb927.6.2850 | organism=Trypanosoma_brucei_brucei_TREU927 | gene_product=ESAG8-associated protein, putative | transcript_product=ESAG8-associated protein, putative | location=Tb927_06_v5.1:851667-8	ESAG8-associated protein	Tb927.6.2850	4	4	4	8.9	8.9	8.9	61.928	0	6.5276	46796000	15	4	4	2	3	3	2	4	4	4	4	2	3	3	2	4	4	4	4	2	3	3	2	4	4	560	560	8.9	8.9	3.9
	2.13285	0.00736457	-0.14355	0.905289	Tb927.3.5320:mRNA-p1	Tb927.3.5320:mRNA-p1	Tb927.3.5320:mRNA-p1 | transcript=Tb927.3.5320:mRNA | gene=Tb927.3.5320 | organism=Trypanosoma_brucei_brucei_TREU927 | gene_product=UBX domain-containing protein | transcript_product=UBX domain-containing protein | location=Tb927_03_v5.1:1496089-1497300(+)	UBX domain-containing protein	Tb927.3.5320	8	8	8	43.9	43.9	43.9	44.912	0	48.545	282580000	43	8	6	5	6	6	8	7	7	8	6	5	6	6	8	7	7	8	6	5	6	6	8	7	7	403	403	43.9	33.5	22.1
	2.12541	0.00749192	-0.28541	0.820508	Tb927.11.1050:mRNA-p1	Tb927.11.1050:mRNA-p1	Tb927.11.1050:mRNA-p1 | transcript=Tb927.11.1050:mRNA | gene=Tb927.11.1050 | organism=Trypanosoma_brucei_brucei_TREU927 | gene_product=ribosome production factor 1, putative | transcript_product=ribosome production factor 1, putative | location=Tb927_11_v5	ribosome production factor 1	Tb927.11.1050	4	4	4	16.6	16.6	16.6	39.646	0	8.3816	54576000	20	4	3	3	4	4	4	4	3	4	3	3	4	4	4	4	3	4	3	3	4	4	4	4	3	331	331	16.6	12.1	13.3
	2.12516	0.0074962	0.208798	1.15573	Tb927.4.5040:mRNA-p1	Tb927.4.5040:mRNA-p1	Tb927.4.5040:mRNA-p1 | transcript=Tb927.4.5040:mRNA | gene=Tb927.4.5040 | organism=Trypanosoma_brucei_brucei_TREU927 | gene_product=dihydrolipoamide dehydrogenase | transcript_product=dihydrolipoamide dehydrogenase | location=Tb927_04_v5.1:1382357-1384102(	dihydrolipoamide dehydrogenase	Tb927.4.5040	7	7	7	16.7	16.7	16.7	63.448	0	14.418	72424000	24	5	6	5	5	4	4	3	6	5	6	5	5	4	4	3	6	5	6	5	5	4	4	3	6	581	581	12.7	14.1	12.4
	2.05767	0.00875649	0.202909	1.15102	Tb927.7.4260:mRNA-p1	Tb927.7.4260:mRNA-p1	Tb927.7.4260:mRNA-p1 | transcript=Tb927.7.4260:mRNA | gene=Tb927.7.4260 | organism=Trypanosoma_brucei_brucei_TREU927 | gene_product=Enriched in surface-labeled proteome protein 13 | transcript_product=Enriched in surface-labeled proteome protein 13 | locat	Enriched in surface-labeled proteome protein 13	Tb927.7.4260	7	7	6	28.5	28.5	23.6	29.135	0	18.605	401760000	51	7	7	7	7	7	7	7	7	7	7	7	7	7	7	7	7	6	6	6	6	6	6	6	6	263	263	28.5	28.5	28.5
	2.02084	0.00953149	0.311071	1.24063	Tb927.11.12260:mRNA-p1	Tb927.11.12260:mRNA-p1	Tb927.11.12260:mRNA-p1 | transcript=Tb927.11.12260:mRNA | gene=Tb927.11.12260 | organism=Trypanosoma_brucei_brucei_TREU927 | gene_product=hypothetical protein, conserved | transcript_product=hypothetical protein, conserved | location=Tb927_11_v5.1:3278853-	hypothetical protein	Tb927.11.12260	5	5	5	12.9	12.9	12.9	66.8	0	5.1647	50337000	10	3	5	5	5	5	5	5	4	3	5	5	5	5	5	5	4	3	5	5	5	5	5	5	4	620	620	6.8	12.9	12.9
	2.01944	0.00956225	-0.0913506	0.938644	Tb927.11.10330:mRNA-p1	Tb927.11.10330:mRNA-p1	Tb927.11.10330:mRNA-p1 | transcript=Tb927.11.10330:mRNA | gene=Tb927.11.10330 | organism=Trypanosoma_brucei_brucei_TREU927 | gene_product=regulator of chromosome condensation 1-like protein | transcript_product=regulator of chromosome condensation 1-like p	regulator of chromosome condensation 1-like protein	Tb927.11.10330	15	15	15	33.3	33.3	33.3	70.392	0	68.151	408750000	66	11	13	12	12	12	14	13	13	11	13	12	12	12	14	13	13	11	13	12	12	12	14	13	13	646	646	25.2	28	26.3
	2.01574	0.00964411	-0.276209	0.825758	Tb927.4.480:mRNA-p1	Tb927.4.480:mRNA-p1	Tb927.4.480:mRNA-p1 | transcript=Tb927.4.480:mRNA | gene=Tb927.4.480 | organism=Trypanosoma_brucei_brucei_TREU927 | gene_product=Cullin binding, putative | transcript_product=Cullin binding, putative | location=Tb927_04_v5.1:138428-139126(-) | protein_leng	Cullin binding	Tb927.4.480	2	2	2	8.2	8.2	8.2	26.932	0	2.7846	26471000	9	2	2	2	2	2	2	2	2	2	2	2	2	2	2	2	2	2	2	2	2	2	2	2	2	232	232	8.2	8.2	8.2
	2.00865	0.00980277	-0.117768	0.921612	Tb927.4.600:mRNA-p1	Tb927.4.600:mRNA-p1	Tb927.4.600:mRNA-p1 | transcript=Tb927.4.600:mRNA | gene=Tb927.4.600 | organism=Trypanosoma_brucei_brucei_TREU927 | gene_product=Alpha/beta hydrolase family, putative | transcript_product=Alpha/beta hydrolase family, putative | location=Tb927_04_v5.1:17208	Alpha/beta hydrolase family	Tb927.4.600	10	10	10	44.5	44.5	44.5	34.458	0	48.959	554410000	59	8	8	9	9	8	8	9	9	8	8	9	9	8	8	9	9	8	8	9	9	8	8	9	9	317	317	34.7	34.7	40.1
	2.00721	0.00983531	0.133645	1.09706	Tb927.10.15000:mRNA-p1	Tb927.10.15000:mRNA-p1	Tb927.10.15000:mRNA-p1 | transcript=Tb927.10.15000:mRNA | gene=Tb927.10.15000 | organism=Trypanosoma_brucei_brucei_TREU927 | gene_product=hypothetical protein, conserved | transcript_product=hypothetical protein, conserved | location=Tb927_10_v5.1:3666262-	hypothetical protein	Tb927.10.15000	19	19	19	50.9	50.9	50.9	48.002	0	112.15	632800000	83	17	17	16	17	18	17	17	16	17	17	16	17	18	17	17	16	17	17	16	17	18	17	17	16	422	422	41.7	50.9	50.9
	2.00669	0.00984713	-0.544512	0.685623	Tb927.11.360:mRNA-p1	Tb927.11.360:mRNA-p1	Tb927.11.360:mRNA-p1 | transcript=Tb927.11.360:mRNA | gene=Tb927.11.360 | organism=Trypanosoma_brucei_brucei_TREU927 | gene_product=ATP-binding protein, putative | transcript_product=ATP-binding protein, putative | location=Tb927_11_v5.1:82444-84243(-) | p	ATP-binding protein	Tb927.11.360	5	5	5	11.9	11.9	11.9	66.678	0	7.53	72396000	9	5	5	5	5	5	5	4	5	5	5	5	5	5	5	4	5	5	5	5	5	5	5	4	5	599	599	11.9	11.9	11.9
	2.00193	0.00995561	-0.404978	0.755248	Tb927.7.1880:mRNA-p1;Tb927.7.1840:mRNA-p1	Tb927.7.1880:mRNA-p1;Tb927.7.1840:mRNA-p1	Tb927.7.1880:mRNA-p1 | transcript=Tb927.7.1880:mRNA | gene=Tb927.7.1880 | organism=Trypanosoma_brucei_brucei_TREU927 | gene_product=zinc finger protein, putative | transcript_product=zinc finger protein, putative | location=Tb927_07_v5.1:451178-452059(+) |	zinc finger protein	Tb927.7.1880	2	2	2	16.4	16.4	16.4	30.973	0	7.8022	51122000	5	2	1	1	2	1	1	2	2	2	1	1	2	1	1	2	2	2	1	1	2	1	1	2	2	293	NaN	16.4	8.9	8.9
	2.00193	0.00995567	-0.127939	0.915138	Tb927.5.1260:mRNA-p1	Tb927.5.1260:mRNA-p1	Tb927.5.1260:mRNA-p1 | transcript=Tb927.5.1260:mRNA | gene=Tb927.5.1260 | organism=Trypanosoma_brucei_brucei_TREU927 | gene_product=Sulfate transporter N-terminal domain with GLY motif/Sulfate transporter family, putative | transcript_product=Sulfate trans	Sulfate transporter N-terminal domain with GLY motif/Sulfate transporter family	Tb927.5.1260	13	13	13	32.5	32.5	32.5	62.563	0	78.456	1267700000	120	12	12	12	12	10	12	12	13	12	12	12	12	10	12	12	13	12	12	12	12	10	12	12	13	573	573	30.9	30.9	30.9
	1.99204	0.010185	0.113081	1.08154	Tb927.4.1930:mRNA-p1;REV__Tb927.11.13360:mRNA-p1	Tb927.4.1930:mRNA-p1	Tb927.4.1930:mRNA-p1 | transcript=Tb927.4.1930:mRNA | gene=Tb927.4.1930 | organism=Trypanosoma_brucei_brucei_TREU927 | gene_product=eukaryotic translation initiation factor 3 subunit g | transcript_product=eukaryotic translation initiation factor 3 subunit	eukaryotic translation initiation factor 3 subunit g	Tb927.4.1930	13	13	13	50.4	50.4	50.4	31.293	0	111.69	1725300000	86	13	12	11	13	12	13	13	11	13	12	11	13	12	13	13	11	13	12	11	13	12	13	13	11	272	NaN	50.4	47.4	44.5
	1.98464	0.0103599	-0.174606	0.88601	Tb927.6.4990:mRNA-p1	Tb927.6.4990:mRNA-p1	Tb927.6.4990:mRNA-p1 | transcript=Tb927.6.4990:mRNA | gene=Tb927.6.4990 | organism=Trypanosoma_brucei_brucei_TREU927 | gene_product=mitochondrial ATP synthase delta chain | transcript_product=mitochondrial ATP synthase delta chain | location=Tb927_06_v5.1:	mitochondrial ATP synthase delta chain	Tb927.6.4990	7	7	7	65.9	65.9	65.9	20.147	0	60.091	635220000	53	7	6	6	7	6	7	7	6	7	6	6	7	6	7	7	6	7	6	6	7	6	7	7	6	182	182	65.9	62.1	62.1
	1.9807	0.0104545	-0.133934	0.911343	Tb927.10.9410:mRNA-p1	Tb927.10.9410:mRNA-p1	Tb927.10.9410:mRNA-p1 | transcript=Tb927.10.9410:mRNA | gene=Tb927.10.9410 | organism=Trypanosoma_brucei_brucei_TREU927 | gene_product=Selenophosphate synthetase 2 | transcript_product=Selenophosphate synthetase 2 | location=Tb927_10_v5.1:2325600-2326781(+	Selenophosphate synthetase 2	Tb927.10.9410	5	5	5	16.3	16.3	16.3	42.984	0	13.228	108070000	17	5	4	4	5	4	4	4	4	5	4	4	5	4	4	4	4	5	4	4	5	4	4	4	4	393	393	16.3	13	13
	1.97564	0.0105769	-0.203363	0.868524	Tb927.11.7930:mRNA-p1	Tb927.11.7930:mRNA-p1	Tb927.11.7930:mRNA-p1 | transcript=Tb927.11.7930:mRNA | gene=Tb927.11.7930 | organism=Trypanosoma_brucei_brucei_TREU927 | gene_product=RNA polymerase B subunit RPB8, putative | transcript_product=RNA polymerase B subunit RPB8, putative | location=Tb927_11_	RNA polymerase B subunit RPB8	Tb927.11.7930	4	4	4	39.6	39.6	39.6	16.33	0	30.333	192600000	30	4	4	4	4	4	4	4	4	4	4	4	4	4	4	4	4	4	4	4	4	4	4	4	4	149	149	39.6	39.6	39.6
	1.96335	0.0108806	-0.261248	0.834366	Tb927.11.2940:mRNA-p1	Tb927.11.2940:mRNA-p1	Tb927.11.2940:mRNA-p1 | transcript=Tb927.11.2940:mRNA | gene=Tb927.11.2940 | organism=Trypanosoma_brucei_brucei_TREU927 | gene_product=hypothetical protein, conserved | transcript_product=hypothetical protein, conserved | location=Tb927_11_v5.1:857051-8581	hypothetical protein	Tb927.11.2940	4	4	4	12	12	12	41.286	0	14.462	122450000	23	4	4	4	4	4	4	4	4	4	4	4	4	4	4	4	4	4	4	4	4	4	4	4	4	375	375	12	12	12
	1.93747	0.0115486	-0.132714	0.912114	Tb927.10.3750:mRNA-p1	Tb927.10.3750:mRNA-p1	Tb927.10.3750:mRNA-p1 | transcript=Tb927.10.3750:mRNA | gene=Tb927.10.3750 | organism=Trypanosoma_brucei_brucei_TREU927 | gene_product=Endonuclease/Exonuclease/phosphatase family, putative | transcript_product=Endonuclease/Exonuclease/phosphatase family, p	Endonuclease/Exonuclease/phosphatase family	Tb927.10.3750	6	6	6	16.2	16.2	16.2	58.818	0	9.2676	62204000	15	5	5	4	5	4	3	4	4	5	5	4	5	4	3	4	4	5	5	4	5	4	3	4	4	518	518	12.7	12.7	10.8
	1.91311	0.0122148	0.104097	1.07482	Tb927.9.3870:mRNA-p1	Tb927.9.3870:mRNA-p1	Tb927.9.3870:mRNA-p1 | transcript=Tb927.9.3870:mRNA | gene=Tb927.9.3870 | organism=Trypanosoma_brucei_brucei_TREU927 | gene_product=hypothetical protein, conserved | transcript_product=hypothetical protein, conserved | location=Tb927_09_v5.1:760986-763100(	hypothetical protein	Tb927.9.3870	6	6	6	12.2	12.2	12.2	79.857	0	7.9576	204000000	15	4	6	6	6	5	6	6	6	4	6	6	6	5	6	6	6	4	6	6	6	5	6	6	6	704	704	6.4	12.2	12.2
	1.89823	0.0126407	0.162697	1.11938	Tb927.10.13110:mRNA-p1	Tb927.10.13110:mRNA-p1	Tb927.10.13110:mRNA-p1 | transcript=Tb927.10.13110:mRNA | gene=Tb927.10.13110 | organism=Trypanosoma_brucei_brucei_TREU927 | gene_product=Outer arm dynein light chain 7 | transcript_product=Outer arm dynein light chain 7 | location=Tb927_10_v5.1:3191431-31	Outer arm dynein light chain 7	Tb927.10.13110	5	5	5	67.8	67.8	67.8	12.826	0	31.723	286410000	33	5	5	5	4	5	5	5	5	5	5	5	4	5	5	5	5	5	5	5	4	5	5	5	5	118	118	67.8	67.8	67.8
	1.88724	0.0129645	-0.236133	0.849018	Tb927.4.3310:mRNA-p1	Tb927.4.3310:mRNA-p1	Tb927.4.3310:mRNA-p1 | transcript=Tb927.4.3310:mRNA | gene=Tb927.4.3310 | organism=Trypanosoma_brucei_brucei_TREU927 | gene_product=TPR repeat/SET domain containing protein, putative | transcript_product=TPR repeat/SET domain containing protein, putative |	TPR repeat/SET domain containing protein	Tb927.4.3310	4	4	4	7.3	7.3	7.3	73.886	0	14.263	83623000	11	4	3	4	4	4	4	4	4	4	3	4	4	4	4	4	4	4	3	4	4	4	4	4	4	673	673	7.3	5.9	7.3
	1.88709	0.0129691	-0.312584	0.805198	Tb927.9.15290:mRNA-p1	Tb927.9.15290:mRNA-p1	Tb927.9.15290:mRNA-p1 | transcript=Tb927.9.15290:mRNA | gene=Tb927.9.15290 | organism=Trypanosoma_brucei_brucei_TREU927 | gene_product=CHAT domain containing protein, putative | transcript_product=CHAT domain containing protein, putative | location=Tb927_0	CHAT domain containing protein	Tb927.9.15290	12	12	12	9.9	9.9	9.9	149.76	0	13.24	130600000	21	8	10	6	9	8	7	7	8	8	10	6	9	8	7	7	8	8	10	6	9	8	7	7	8	1378	1378	7.3	8.5	6.4
	1.88139	0.0131405	-0.0702863	0.952449	Tb927.10.9650:mRNA-p1;Tb11.v5.0399.1-p1	Tb927.10.9650:mRNA-p1;Tb11.v5.0399.1-p1	Tb927.10.9650:mRNA-p1 | transcript=Tb927.10.9650:mRNA | gene=Tb927.10.9650 | organism=Trypanosoma_brucei_brucei_TREU927 | gene_product=Nucleoporin NUP152 | transcript_product=Nucleoporin NUP152 | location=Tb927_10_v5.1:2377684-2381904(+) | protein_length=1	Nucleoporin NUP152	Tb927.10.9650	24	24	24	26.2	26.2	26.2	152.97	0	100.91	795840000	99	20	21	18	21	20	19	22	19	20	21	18	21	20	19	22	19	20	21	18	21	20	19	22	19	1406	NaN	20.8	23	19.5
	1.87322	0.0133901	0.175467	1.12933	Tb927.11.6010:mRNA-p1	Tb927.11.6010:mRNA-p1	Tb927.11.6010:mRNA-p1 | transcript=Tb927.11.6010:mRNA | gene=Tb927.11.6010 | organism=Trypanosoma_brucei_brucei_TREU927 | gene_product=conserved protein, unknown function | transcript_product=conserved protein, unknown function | location=Tb927_11_v5.1:170	conserved protein	Tb927.11.6010	4	4	4	38.4	38.4	38.4	17.987	0	23.852	86777000	17	2	3	3	4	4	4	4	4	2	3	3	4	4	4	4	4	2	3	3	4	4	4	4	4	164	164	25	32.3	32.3
	1.86963	0.013501	-0.206291	0.866763	Tb927.11.2260:mRNA-p1	Tb927.11.2260:mRNA-p1	Tb927.11.2260:mRNA-p1 | transcript=Tb927.11.2260:mRNA | gene=Tb927.11.2260 | organism=Trypanosoma_brucei_brucei_TREU927 | gene_product=Eukaryotic translation initiation factor 4E-1 | transcript_product=Eukaryotic translation initiation factor 4E-1 | locati	Eukaryotic translation initiation factor 4E-1	Tb927.11.2260	9	9	9	46.4	46.4	46.4	26.024	0	63.139	739310000	79	8	8	9	8	8	8	8	8	8	8	9	8	8	8	8	8	8	8	9	8	8	8	8	8	233	233	44.6	44.6	46.4
	1.86155	0.0137546	-0.251379	0.840093	Tb927.11.460:mRNA-p1;Tb11.v5.0726.1-p1	Tb927.11.460:mRNA-p1;Tb11.v5.0726.1-p1	Tb927.11.460:mRNA-p1 | transcript=Tb927.11.460:mRNA | gene=Tb927.11.460 | organism=Trypanosoma_brucei_brucei_TREU927 | gene_product=predicted WD40 repeat protein | transcript_product=predicted WD40 repeat protein | location=Tb927_11_v5.1:103046-105892(-) |	predicted WD40 repeat protein	Tb927.11.460	10	10	10	16	16	16	103.67	0	17.311	128110000	17	6	8	8	6	7	8	5	8	6	8	8	6	7	8	5	8	6	8	8	6	7	8	5	8	948	NaN	10.8	12.9	13.8
	1.84909	0.0141549	-0.221278	0.857805	Tb927.4.850:mRNA-p1	Tb927.4.850:mRNA-p1	Tb927.4.850:mRNA-p1 | transcript=Tb927.4.850:mRNA | gene=Tb927.4.850 | organism=Trypanosoma_brucei_brucei_TREU927 | gene_product=hypothetical protein, conserved | transcript_product=hypothetical protein, conserved | location=Tb927_04_v5.1:235465-236031(-)	hypothetical protein	Tb927.4.850	5	5	5	36.7	36.7	36.7	22.142	0	18.837	137260000	21	5	4	4	5	5	5	3	4	5	4	4	5	5	5	3	4	5	4	4	5	5	5	3	4	188	188	36.7	29.8	30.9
	1.84696	0.0142248	-0.196971	0.87238	Tb927.10.8660:mRNA-p1	Tb927.10.8660:mRNA-p1	Tb927.10.8660:mRNA-p1 | transcript=Tb927.10.8660:mRNA | gene=Tb927.10.8660 | organism=Trypanosoma_brucei_brucei_TREU927 | gene_product=Fis1 C-terminal tetratricopeptide repeat, putative | transcript_product=Fis1 C-terminal tetratricopeptide repeat, putativ	Fis1 C-terminal tetratricopeptide repeat	Tb927.10.8660	3	3	3	17	17	17	26.812	0	7.923	110860000	18	2	2	2	2	2	2	2	3	2	2	2	2	2	2	2	3	2	2	2	2	2	2	2	3	241	241	12.9	12.9	12.9
	1.84692	0.0142259	-0.427258	0.743674	Tb927.5.1530:mRNA-p1	Tb927.5.1530:mRNA-p1	Tb927.5.1530:mRNA-p1 | transcript=Tb927.5.1530:mRNA | gene=Tb927.5.1530 | organism=Trypanosoma_brucei_brucei_TREU927 | gene_product=Flavin-binding monooxygenase-like, putative | transcript_product=Flavin-binding monooxygenase-like, putative | location=Tb92	Flavin-binding monooxygenase-like	Tb927.5.1530	2	2	2	4.3	4.3	4.3	59.943	0	3.1812	9970800	8	2	1	2	2	2	2	2	2	2	1	2	2	2	2	2	2	2	1	2	2	2	2	2	2	538	538	4.3	2	4.3
	1.82819	0.0148527	-0.314519	0.804119	Tb927.11.6410:mRNA-p1	Tb927.11.6410:mRNA-p1	Tb927.11.6410:mRNA-p1 | transcript=Tb927.11.6410:mRNA | gene=Tb927.11.6410 | organism=Trypanosoma_brucei_brucei_TREU927 | gene_product=regulator of nonsense transcripts 2 | transcript_product=regulator of nonsense transcripts 2 | location=Tb927_11_v5.1:180	regulator of nonsense transcripts 2	Tb927.11.6410	4	4	4	3.5	3.5	3.5	162.5	0.00049579	2.3736	34264000	6	3	3	3	3	3	3	3	3	3	3	3	3	3	3	3	3	3	3	3	3	3	3	3	3	1454	1454	3	2.9	2.9
	1.82727	0.0148843	-0.374207	0.77153	Tb927.5.3310:mRNA-p1	Tb927.5.3310:mRNA-p1	Tb927.5.3310:mRNA-p1 | transcript=Tb927.5.3310:mRNA | gene=Tb927.5.3310 | organism=Trypanosoma_brucei_brucei_TREU927 | gene_product=hypothetical protein, conserved | transcript_product=hypothetical protein, conserved | location=Tb927_05_v5.1:1096991-109806	hypothetical protein	Tb927.5.3310	3	3	3	16.5	16.5	16.5	38.109	0	6.8678	49913000	13	3	2	3	1	2	2	2	2	3	2	3	1	2	2	2	2	3	2	3	1	2	2	2	2	357	357	16.5	14.6	16.5
	1.82582	0.0149343	-0.198701	0.871335	Tb927.1.1530:mRNA-p1;Tb11.v5.0534.1-p1	Tb927.1.1530:mRNA-p1	Tb927.1.1530:mRNA-p1 | transcript=Tb927.1.1530:mRNA | gene=Tb927.1.1530 | organism=Trypanosoma_brucei_brucei_TREU927 | gene_product=STE group serine/threonine-protein kinase, putative | transcript_product=STE group serine/threonine-protein kinase, putative	STE group serine/threonine-protein kinase	Tb927.1.1530	11	11	11	8.8	8.8	8.8	191.48	0	30.828	189270000	49	9	9	8	8	9	10	10	10	9	9	8	8	9	10	10	10	9	9	8	8	9	10	10	10	1742	NaN	7.2	7.2	6.5
	1.80967	0.0154998	0.117049	1.08451	Tb927.3.3450:mRNA-p1	Tb927.3.3450:mRNA-p1	Tb927.3.3450:mRNA-p1 | transcript=Tb927.3.3450:mRNA | gene=Tb927.3.3450 | organism=Trypanosoma_brucei_brucei_TREU927 | gene_product=ADP-ribosylation factor-like protein 3, putative | transcript_product=ADP-ribosylation factor-like protein 3, putative | loc	ADP-ribosylation factor-like protein 3	Tb927.3.3450	13	13	13	80.3	80.3	80.3	19.881	0	323.31	16316000000	179	13	13	13	13	13	13	13	13	13	13	13	13	13	13	13	13	13	13	13	13	13	13	13	13	178	178	80.3	80.3	80.3
	1.78625	0.0163588	0.184618	1.13652	Tb927.11.7270:mRNA-p1;Tb11.v5.0256.1-p1	Tb927.11.7270:mRNA-p1;Tb11.v5.0256.1-p1	Tb927.11.7270:mRNA-p1 | transcript=Tb927.11.7270:mRNA | gene=Tb927.11.7270 | organism=Trypanosoma_brucei_brucei_TREU927 | gene_product=proteasome beta 3 subunit, putative | transcript_product=proteasome beta 3 subunit, putative | location=Tb927_11_v5.1:205	proteasome beta 3 subunit	Tb927.11.7270	6	6	6	27.8	27.8	27.8	22.484	0	21.644	1064500000	64	6	5	5	6	6	6	6	6	6	5	5	6	6	6	6	6	6	5	5	6	6	6	6	6	205	NaN	27.8	23.9	23.9
	1.76887	0.0170267	-0.167305	0.890505	Tb927.11.1380:mRNA-p1	Tb927.11.1380:mRNA-p1	Tb927.11.1380:mRNA-p1 | transcript=Tb927.11.1380:mRNA | gene=Tb927.11.1380 | organism=Trypanosoma_brucei_brucei_TREU927 | gene_product=Right handed beta helix region/Periplasmic copper-binding protein (NosD), putative | transcript_product=Right handed beta	Right handed beta helix region/Periplasmic copper-binding protein (NosD)	Tb927.11.1380	13	13	13	5.7	5.7	5.7	325.55	0	15.732	164200000	29	10	12	12	11	8	11	11	9	10	12	12	11	8	11	11	9	10	12	12	11	8	11	11	9	2998	2998	4.7	5.3	5.3
	1.76276	0.0172678	-0.237606	0.848152	Tb927.2.1140:pseudogenic_transcript-p1	Tb927.2.1140:pseudogenic_transcript-p1	Tb927.2.1140:pseudogenic_transcript-p1 | transcript=Tb927.2.1140:pseudogenic_transcript | gene=Tb927.2.1140 | organism=Trypanosoma_brucei_brucei_TREU927 | gene_product=retrotransposon hot spot protein 3 (RHS3), interrupted | transcript_product=retrotranspo	retrotransposon hot spot protein 3 (RHS3)	Tb927.2.1140	7	1	1	20.3	2.6	2.6	37.92	0	3.0289	49709000	4	6	6	7	6	6	6	6	6	1	1	1	1	1	1	1	1	1	1	1	1	1	1	1	1	340	340	18.2	18.2	20.3
	1.75942	0.0174011	-0.157214	0.896755	Tb927.11.11590:mRNA-p1	Tb927.11.11590:mRNA-p1	Tb927.11.11590:mRNA-p1 | transcript=Tb927.11.11590:mRNA | gene=Tb927.11.11590 | organism=Trypanosoma_brucei_brucei_TREU927 | gene_product=Eukaryotic translation initiation factor 3 subunit E | transcript_product=Eukaryotic translation initiation factor 3 s	Eukaryotic translation initiation factor 3 subunit E	Tb927.11.11590	17	17	17	57.1	57.1	57.1	46.677	0	291.66	1978500000	139	16	14	16	16	16	16	16	16	16	14	16	16	16	16	16	16	16	14	16	16	16	16	16	16	413	413	53	48.4	55
	1.75466	0.0175928	-0.353875	0.78248	Tb927.8.5040:mRNA-p1	Tb927.8.5040:mRNA-p1	Tb927.8.5040:mRNA-p1 | transcript=Tb927.8.5040:mRNA | gene=Tb927.8.5040 | organism=Trypanosoma_brucei_brucei_TREU927 | gene_product=EMG1/NEP1 methyltransferase, putative | transcript_product=EMG1/NEP1 methyltransferase, putative | location=Tb927_08_v5.1:14	EMG1/NEP1 methyltransferase	Tb927.8.5040	2	2	2	8.3	8.3	8.3	31.11	0	3.8294	33025000	13	2	2	1	2	2	2	2	1	2	2	1	2	2	2	2	1	2	2	1	2	2	2	2	1	278	278	8.3	8.3	5
	1.74975	0.0177932	-0.26505	0.83217	Tb927.11.16120:mRNA-p1	Tb927.11.16120:mRNA-p1	Tb927.11.16120:mRNA-p1 | transcript=Tb927.11.16120:mRNA | gene=Tb927.11.16120 | organism=Trypanosoma_brucei_brucei_TREU927 | gene_product=hypothetical protein, conserved | transcript_product=hypothetical protein, conserved | location=Tb927_11_v5.1:4269603-	hypothetical protein	Tb927.11.16120	5	5	5	8.2	8.2	8.2	67.926	0	7.1952	49836000	15	4	5	4	4	4	4	4	5	4	5	4	4	4	4	4	5	4	5	4	4	4	4	4	5	610	610	6.2	8.2	6.6
	1.74966	0.0177968	-0.288436	0.818789	Tb927.4.4650:mRNA-p1	Tb927.4.4650:mRNA-p1	Tb927.4.4650:mRNA-p1 | transcript=Tb927.4.4650:mRNA | gene=Tb927.4.4650 | organism=Trypanosoma_brucei_brucei_TREU927 | gene_product=diphthine synthase, putative | transcript_product=diphthine synthase, putative | location=Tb927_04_v5.1:1279421-1280230(-) |	diphthine synthase	Tb927.4.4650	5	5	5	29	29	29	29.49	0	11.55	150090000	13	5	4	4	3	4	4	5	4	5	4	4	3	4	4	5	4	5	4	4	3	4	4	5	4	269	269	29	24.2	24.2
	1.73994	0.0181996	-0.132199	0.912439	Tb927.3.3830:mRNA-p1	Tb927.3.3830:mRNA-p1	Tb927.3.3830:mRNA-p1 | transcript=Tb927.3.3830:mRNA | gene=Tb927.3.3830 | organism=Trypanosoma_brucei_brucei_TREU927 | gene_product=hypothetical protein, conserved | transcript_product=hypothetical protein, conserved | location=Tb927_03_v5.1:1063644-106478	hypothetical protein	Tb927.3.3830	17	17	17	68	68	68	42.628	0	149.98	1612300000	106	15	17	17	13	16	16	15	17	15	17	17	13	16	16	15	17	15	17	17	13	16	16	15	17	378	378	59.3	68	68
	1.73165	0.0185501	-0.207292	0.866162	Tb927.11.14870:mRNA-p1	Tb927.11.14870:mRNA-p1	Tb927.11.14870:mRNA-p1 | transcript=Tb927.11.14870:mRNA | gene=Tb927.11.14870 | organism=Trypanosoma_brucei_brucei_TREU927 | gene_product=NAD+ synthase, putative | transcript_product=NAD+ synthase, putative | location=Tb927_11_v5.1:3949222-3950106(-) | pro	NAD+ synthase	Tb927.11.14870	7	7	7	24.8	24.8	24.8	32.916	0	45.705	319440000	48	7	6	7	6	6	6	5	7	7	6	7	6	6	6	5	7	7	6	7	6	6	6	5	7	294	294	24.8	19	24.8
	1.73137	0.0185622	-0.479455	0.717249	Tb927.11.13580:mRNA-p1	Tb927.11.13580:mRNA-p1	Tb927.11.13580:mRNA-p1 | transcript=Tb927.11.13580:mRNA | gene=Tb927.11.13580 | organism=Trypanosoma_brucei_brucei_TREU927 | gene_product=ubiquinone biosynthesis protein-like protein | transcript_product=ubiquinone biosynthesis protein-like protein | locat	ubiquinone biosynthesis protein-like protein	Tb927.11.13580	5	5	5	32.1	32.1	32.1	27.93	0	11.792	84686000	18	3	3	4	2	5	4	4	3	3	3	4	2	5	4	4	3	3	3	4	2	5	4	4	3	249	249	20.1	18.9	26.5
	1.7301	0.0186166	-0.0823593	0.944512	Tb927.9.11850:mRNA-p1	Tb927.9.11850:mRNA-p1	Tb927.9.11850:mRNA-p1 | transcript=Tb927.9.11850:mRNA | gene=Tb927.9.11850 | organism=Trypanosoma_brucei_brucei_TREU927 | gene_product=structural maintenance of chromosome 1, putative | transcript_product=structural maintenance of chromosome 1, putative |	structural maintenance of chromosome 1	Tb927.9.11850	32	32	32	30.4	30.4	30.4	144.54	0	75.476	692130000	136	30	26	24	27	26	26	29	27	30	26	24	27	26	26	29	27	30	26	24	27	26	26	29	27	1275	1275	28.9	24.4	22.4
	1.72044	0.0190353	-0.236104	0.849035	Tb927.8.6210:mRNA-p1	Tb927.8.6210:mRNA-p1	Tb927.8.6210:mRNA-p1 | transcript=Tb927.8.6210:mRNA | gene=Tb927.8.6210 | organism=Trypanosoma_brucei_brucei_TREU927 | gene_product=phosphatidylinositol 3-kinase, putative | transcript_product=phosphatidylinositol 3-kinase, putative | location=Tb927_08_v5.	phosphatidylinositol 3-kinase	Tb927.8.6210	4	4	4	9	9	9	106.22	0	13.833	85559000	15	4	4	4	4	3	3	4	4	4	4	4	4	3	3	4	4	4	4	4	4	3	3	4	4	949	949	9	9	9
	1.71997	0.0190558	0.127423	1.09234	Tb927.9.8990:mRNA-p1	Tb927.9.8990:mRNA-p1	Tb927.9.8990:mRNA-p1 | transcript=Tb927.9.8990:mRNA | gene=Tb927.9.8990 | organism=Trypanosoma_brucei_brucei_TREU927 | gene_product=Ankyrin repeats (3 copies), putative | transcript_product=Ankyrin repeats (3 copies), putative | location=Tb927_09_v5.1:1440	Ankyrin repeats (3 copies)	Tb927.9.8990	13	13	13	54.2	54.2	54.2	38.856	0	102.48	1348200000	123	12	12	12	11	11	11	11	12	12	12	12	11	11	11	11	12	12	12	12	11	11	11	11	12	345	345	48.4	49	48.4
	1.71791	0.0191467	0.240849	1.18169	Tb927.11.12430:mRNA-p1	Tb927.11.12430:mRNA-p1	Tb927.11.12430:mRNA-p1 | transcript=Tb927.11.12430:mRNA | gene=Tb927.11.12430 | organism=Trypanosoma_brucei_brucei_TREU927 | gene_product=cell division cycle phosphatase 14, putative | transcript_product=cell division cycle phosphatase 14, putative | locat	cell division cycle phosphatase 14	Tb927.11.12430	2	2	2	4	4	4	89.335	0	3.9698	33465000	8	2	1	1	2	2	2	2	2	2	1	1	2	2	2	2	2	2	1	1	2	2	2	2	2	818	818	4	2.7	1.3
	1.67538	0.0211163	-0.0724244	0.951038	Tb927.1.1380:mRNA-p1;Tb11.v5.0390.1-p1	Tb927.1.1380:mRNA-p1;Tb11.v5.0390.1-p1	Tb927.1.1380:mRNA-p1 | transcript=Tb927.1.1380:mRNA | gene=Tb927.1.1380 | organism=Trypanosoma_brucei_brucei_TREU927 | gene_product=serine/threonine protein phosphatase 2A regulatory subunit, putative | transcript_product=serine/threonine protein phosphata	serine/threonine protein phosphatase 2A regulatory subunit	Tb927.1.1380	20	20	20	50.4	50.4	50.4	62.615	0	75.233	751920000	89	14	15	15	15	16	15	14	16	14	15	15	15	16	15	14	16	14	15	15	15	16	15	14	16	573	NaN	35.8	38.6	40.1
	1.67196	0.0212832	-0.0982556	0.934162	Tb927.10.13280:mRNA-p1	Tb927.10.13280:mRNA-p1	Tb927.10.13280:mRNA-p1 | transcript=Tb927.10.13280:mRNA | gene=Tb927.10.13280 | organism=Trypanosoma_brucei_brucei_TREU927 | gene_product=hypothetical protein, conserved | transcript_product=hypothetical protein, conserved | location=Tb927_10_v5.1:3238200-	hypothetical protein	Tb927.10.13280	69	69	69	38.3	38.3	38.3	286.2	0	307.07	2302000000	346	55	61	61	60	59	58	58	64	55	61	61	60	59	58	58	64	55	61	61	60	59	58	58	64	2606	2606	30.9	34	33.4
	1.66817	0.0214701	-0.147334	0.902918	Tb927.11.6660:mRNA-p1	Tb927.11.6660:mRNA-p1	Tb927.11.6660:mRNA-p1 | transcript=Tb927.11.6660:mRNA | gene=Tb927.11.6660 | organism=Trypanosoma_brucei_brucei_TREU927 | gene_product=Tex-like protein N-terminal domain/Helix-hairpin-helix motif containing protein, putative | transcript_product=Tex-like p	Tex-like protein N-terminal domain/Helix-hairpin-helix motif containing protein	Tb927.11.6660	10	10	10	14.5	14.5	14.5	103.55	0	17.05	144850000	28	9	8	9	9	10	10	8	10	9	8	9	9	10	10	8	10	9	8	9	9	10	10	8	10	935	935	12.9	10.9	12.9
	1.66697	0.0215292	-0.233351	0.850657	Tb927.10.5210:mRNA-p1;Tb11.v5.0236.1-p1	Tb927.10.5210:mRNA-p1;Tb11.v5.0236.1-p1	Tb927.10.5210:mRNA-p1 | transcript=Tb927.10.5210:mRNA | gene=Tb927.10.5210 | organism=Trypanosoma_brucei_brucei_TREU927 | gene_product=TFIIH basal transcription factor subunit | transcript_product=TFIIH basal transcription factor subunit | location=Tb927_1	TFIIH basal transcription factor subunit	Tb927.10.5210	1	1	1	5.2	5.2	5.2	55.956	0	3.1917	6335800	1	1	1	1	1	1	1	1	0	1	1	1	1	1	1	1	0	1	1	1	1	1	1	1	0	500	NaN	5.2	5.2	5.2
	1.66661	0.0215471	-0.267714	0.830635	Tb927.11.6280:mRNA-p1	Tb927.11.6280:mRNA-p1	Tb927.11.6280:mRNA-p1 | transcript=Tb927.11.6280:mRNA | gene=Tb927.11.6280 | organism=Trypanosoma_brucei_brucei_TREU927 | gene_product=pyruvate phosphate dikinase | transcript_product=pyruvate phosphate dikinase | location=Tb927_11_v5.1:1768333-1771074(-)	pyruvate phosphate dikinase	Tb927.11.6280	7	7	7	12.9	12.9	12.9	100.45	0	31.739	198160000	23	5	6	5	7	4	7	6	6	5	6	5	7	4	7	6	6	5	6	5	7	4	7	6	6	913	913	10.1	11.6	9.4
	1.66579	0.0215878	-0.351913	0.783544	Tb927.11.3860:mRNA-p1	Tb927.11.3860:mRNA-p1	Tb927.11.3860:mRNA-p1 | transcript=Tb927.11.3860:mRNA | gene=Tb927.11.3860 | organism=Trypanosoma_brucei_brucei_TREU927 | gene_product=hypothetical protein, conserved | transcript_product=hypothetical protein, conserved | location=Tb927_11_v5.1:1132000-113	hypothetical protein	Tb927.11.3860	3	3	3	10.4	10.4	10.4	50.409	0	11.92	49414000	18	3	3	3	3	3	3	3	3	3	3	3	3	3	3	3	3	3	3	3	3	3	3	3	3	451	451	10.4	10.4	10.4
	1.65529	0.0221161	-0.177616	0.884163	Tb927.10.3540:mRNA-p1	Tb927.10.3540:mRNA-p1	Tb927.10.3540:mRNA-p1 | transcript=Tb927.10.3540:mRNA | gene=Tb927.10.3540 | organism=Trypanosoma_brucei_brucei_TREU927 | gene_product=hypothetical protein, conserved | transcript_product=hypothetical protein, conserved | location=Tb927_10_v5.1:915333-9160	hypothetical protein	Tb927.10.3540	7	7	7	61.1	61.1	61.1	24.291	0	33.158	323320000	57	6	6	6	6	7	6	7	7	6	6	6	6	7	6	7	7	6	6	6	6	7	6	7	7	226	226	56.6	56.6	56.6
	1.6545	0.0221566	-0.143341	0.90542	Tb927.10.16100:mRNA-p1;Tb11.v5.0411.1-p1	Tb927.10.16100:mRNA-p1;Tb11.v5.0411.1-p1	Tb927.10.16100:mRNA-p1 | transcript=Tb927.10.16100:mRNA | gene=Tb927.10.16100 | organism=Trypanosoma_brucei_brucei_TREU927 | gene_product=FK506-binding protein (FKBP)-type peptidyl-prolyl isomerase, putative | transcript_product=FK506-binding protein (FKBP	FK506-binding protein (FKBP)-type peptidyl-prolyl isomerase	Tb927.10.16100	18	18	18	60.7	60.7	60.7	47.604	0	323.31	20684000000	340	17	17	17	18	17	17	17	17	17	17	17	18	17	17	17	17	17	17	17	18	17	17	17	17	425	NaN	59.1	59.1	59.1
	1.65106	0.0223325	-0.316764	0.802869	Tb927.8.5080:mRNA-p1	Tb927.8.5080:mRNA-p1	Tb927.8.5080:mRNA-p1 | transcript=Tb927.8.5080:mRNA | gene=Tb927.8.5080 | organism=Trypanosoma_brucei_brucei_TREU927 | gene_product=fatty-acid amide hydrolase, putative | transcript_product=fatty-acid amide hydrolase, putative | location=Tb927_08_v5.1:1498	fatty-acid amide hydrolase	Tb927.8.5080	5	5	5	13.4	13.4	13.4	65.43	0	11.135	52596000	18	3	4	4	4	4	5	4	3	3	4	4	4	4	5	4	3	3	4	4	4	4	5	4	3	595	595	9.2	12.1	12.1
	1.63358	0.0232498	-0.426526	0.744052	Tb927.11.3140:mRNA-p1	Tb927.11.3140:mRNA-p1	Tb927.11.3140:mRNA-p1 | transcript=Tb927.11.3140:mRNA | gene=Tb927.11.3140 | organism=Trypanosoma_brucei_brucei_TREU927 | gene_product=dual specificity tyrosine-phosphorylation-regulated kinase 2, putative | transcript_product=dual specificity tyrosine-pho	dual specificity tyrosine-phosphorylation-regulated kinase 2	Tb927.11.3140	2	2	2	5.1	5.1	5.1	51.581	0.000251	2.5762	21410000	5	1	1	1	1	1	2	1	1	1	1	1	1	1	2	1	1	1	1	1	1	1	2	1	1	455	455	2.2	2.2	2.2
	1.62693	0.0236086	-0.162769	0.893309	Tb927.6.2050:mRNA-p1	Tb927.6.2050:mRNA-p1	Tb927.6.2050:mRNA-p1 | transcript=Tb927.6.2050:mRNA | gene=Tb927.6.2050 | organism=Trypanosoma_brucei_brucei_TREU927 | gene_product=ribosome biogenesis regulatory protein (RRS1), putative | transcript_product=ribosome biogenesis regulatory protein (RRS1),	ribosome biogenesis regulatory protein (RRS1)	Tb927.6.2050	5	5	5	33.3	33.3	33.3	24.654	0	15.508	103230000	29	5	5	3	3	5	4	5	5	5	5	3	3	5	4	5	5	5	5	3	3	5	4	5	5	213	213	33.3	33.3	18.3
	1.62376	0.0237814	-0.164718	0.892103	Tb927.7.4990:mRNA-p1;Tb11.v5.0180.1-p1	Tb927.7.4990:mRNA-p1;Tb11.v5.0180.1-p1	Tb927.7.4990:mRNA-p1 | transcript=Tb927.7.4990:mRNA | gene=Tb927.7.4990 | organism=Trypanosoma_brucei_brucei_TREU927 | gene_product=hypothetical protein, conserved | transcript_product=hypothetical protein, conserved | location=Tb927_07_v5.1:1321294-132353	hypothetical protein	Tb927.7.4990	11	11	11	18.1	18.1	18.1	82.659	0	38.777	549620000	33	9	10	9	8	9	9	8	10	9	10	9	8	9	9	8	10	9	10	9	8	9	9	8	10	746	NaN	14.7	16.6	14.7
	1.61617	0.0242008	-0.757966	0.59133	Tb927.5.3430:mRNA-p1	Tb927.5.3430:mRNA-p1	Tb927.5.3430:mRNA-p1 | transcript=Tb927.5.3430:mRNA | gene=Tb927.5.3430 | organism=Trypanosoma_brucei_brucei_TREU927 | gene_product=ubiquitin-activating enzyme E1, putative | transcript_product=ubiquitin-activating enzyme E1, putative | location=Tb927_05_v	ubiquitin-activating enzyme E1	Tb927.5.3430	4	4	4	8.3	8.3	8.3	86.593	0	14.238	56964000	9	1	4	4	2	4	3	2	4	1	4	4	2	4	3	2	4	1	4	4	2	4	3	2	4	796	796	2.5	8.3	8.3
	1.61612	0.0242037	-0.241785	0.845699	Tb927.7.280:mRNA-p1	Tb927.7.280:mRNA-p1	Tb927.7.280:mRNA-p1 | transcript=Tb927.7.280:mRNA | gene=Tb927.7.280 | organism=Trypanosoma_brucei_brucei_TREU927 | gene_product=cyclophilin-type peptidyl-prolyl cis-trans isomerase, putative | transcript_product=cyclophilin-type peptidyl-prolyl cis-trans	cyclophilin-type peptidyl-prolyl cis-trans isomerase	Tb927.7.280	4	4	4	27.6	27.6	27.6	24.302	0	45.196	213290000	23	4	4	4	4	4	4	4	4	4	4	4	4	4	4	4	4	4	4	4	4	4	4	4	4	225	225	27.6	27.6	27.6
	1.61511	0.02426	-0.087606	0.941083	Tb927.11.2520:mRNA-p1	Tb927.11.2520:mRNA-p1	Tb927.11.2520:mRNA-p1 | transcript=Tb927.11.2520:mRNA | gene=Tb927.11.2520 | organism=Trypanosoma_brucei_brucei_TREU927 | gene_product=UDP-n-acetylglucosamine pyrophosphorylase | transcript_product=UDP-n-acetylglucosamine pyrophosphorylase | location=Tb927	UDP-n-acetylglucosamine pyrophosphorylase	Tb927.11.2520	19	19	19	47.3	47.3	47.3	60.161	0	71.278	673810000	102	16	19	18	17	17	17	18	16	16	19	18	17	17	17	18	16	16	19	18	17	17	17	18	16	545	545	40.7	47.3	45
	1.61378	0.0243346	0.219503	1.16433	Tb927.6.1260:mRNA-p1;Tb11.v5.0742.1-p1	Tb927.6.1260:mRNA-p1;Tb11.v5.0742.1-p1	Tb927.6.1260:mRNA-p1 | transcript=Tb927.6.1260:mRNA | gene=Tb927.6.1260 | organism=Trypanosoma_brucei_brucei_TREU927 | gene_product=proteasome beta-1 subunit, putative | transcript_product=proteasome beta-1 subunit, putative | location=Tb927_06_v5.1:469738	proteasome beta-1 subunit	Tb927.6.1260	5	5	5	29.1	29.1	29.1	30.441	0	47.022	368790000	31	4	5	5	3	4	4	4	4	4	5	5	3	4	4	4	4	4	5	5	3	4	4	4	4	282	NaN	25.9	29.1	29.1
	1.59121	0.0256322	-0.169048	0.88943	Tb927.3.4270:mRNA-p1	Tb927.3.4270:mRNA-p1	Tb927.3.4270:mRNA-p1 | transcript=Tb927.3.4270:mRNA | gene=Tb927.3.4270 | organism=Trypanosoma_brucei_brucei_TREU927 | gene_product=hypothetical protein, conserved | transcript_product=hypothetical protein, conserved | location=Tb927_03_v5.1:1202789-120553	hypothetical protein	Tb927.3.4270	17	17	17	29.1	29.1	29.1	99.496	0	49.353	404070000	67	14	14	16	15	15	13	12	16	14	14	16	15	15	13	12	16	14	14	16	15	15	13	12	16	916	916	23.7	24	26.7
	1.59063	0.0256665	-0.171206	0.8881	Tb927.7.300:mRNA-p1	Tb927.7.300:mRNA-p1	Tb927.7.300:mRNA-p1 | transcript=Tb927.7.300:mRNA | gene=Tb927.7.300 | organism=Trypanosoma_brucei_brucei_TREU927 | gene_product=UDP-Gal or UDP-GlcNAc-dependent glycosyltransferase, putative | transcript_product=UDP-Gal or UDP-GlcNAc-dependent glycosyltran	UDP-Gal or UDP-GlcNAc-dependent glycosyltransferase	Tb927.7.300	9	9	9	38.7	38.7	38.7	43.144	0	55.122	236350000	40	9	9	8	8	8	9	8	9	9	9	8	8	8	9	8	9	9	9	8	8	8	9	8	9	367	367	38.7	38.7	38.7
	1.58889	0.0257696	0.105158	1.07561	Tb927.10.5350:mRNA-p1;Tb11.v5.0242.1-p1;Tb11.v5.0241.1-p1	Tb927.10.5350:mRNA-p1;Tb11.v5.0242.1-p1	Tb927.10.5350:mRNA-p1 | transcript=Tb927.10.5350:mRNA | gene=Tb927.10.5350 | organism=Trypanosoma_brucei_brucei_TREU927 | gene_product=dynein heavy chain, putative | transcript_product=dynein heavy chain, putative | location=Tb927_10_v5.1:1334522-1346950(+	dynein heavy chain	Tb927.10.5350	68	65	64	21.3	20.5	20.3	474.7	0	128.35	1946000000	251	58	60	57	54	54	55	58	58	55	57	54	51	51	52	55	55	54	56	53	50	50	51	54	54	4142	NaN	18.4	18.9	18.1
	1.5834	0.0260978	-0.107577	0.928146	Tb927.6.2710:mRNA-p1	Tb927.6.2710:mRNA-p1	Tb927.6.2710:mRNA-p1 | transcript=Tb927.6.2710:mRNA | gene=Tb927.6.2710 | organism=Trypanosoma_brucei_brucei_TREU927 | gene_product=hypothetical protein, conserved | transcript_product=hypothetical protein, conserved | location=Tb927_06_v5.1:812991-815276(	hypothetical protein	Tb927.6.2710	11	11	11	19.1	19.1	19.1	85.616	0	21.57	201370000	39	8	8	9	8	8	9	9	10	8	8	9	8	8	9	9	10	8	8	9	8	8	9	9	10	761	761	15.2	12.4	16.3
	1.58242	0.0261563	-0.070745	0.952146	Tb927.4.410:mRNA-p1	Tb927.4.410:mRNA-p1	Tb927.4.410:mRNA-p1 | transcript=Tb927.4.410:mRNA | gene=Tb927.4.410 | organism=Trypanosoma_brucei_brucei_TREU927 | gene_product=CAF 40 | transcript_product=CAF 40 | location=Tb927_04_v5.1:117385-118335(-) | protein_length=316 | sequence_SO=chromosome | SO	CAF 40	Tb927.4.410	15	15	15	58.2	58.2	58.2	35.32	0	79.216	1501400000	95	15	15	15	15	15	14	14	15	15	15	15	15	15	14	14	15	15	15	15	15	15	14	14	15	316	316	58.2	58.2	58.2
	1.56562	0.0271884	-0.158786	0.895779	Tb927.8.720:mRNA-p1	Tb927.8.720:mRNA-p1	Tb927.8.720:mRNA-p1 | transcript=Tb927.8.720:mRNA | gene=Tb927.8.720 | organism=Trypanosoma_brucei_brucei_TREU927 | gene_product=Cytosolic iron-sulfur protein assembly 2B, putative | transcript_product=Cytosolic iron-sulfur protein assembly 2B, putative |	Cytosolic iron-sulfur protein assembly 2B	Tb927.8.720	1	1	1	11.2	11.2	11.2	18.2	0.0080147	1.206	19586000	1	1	1	1	1	1	1	1	1	1	1	1	1	1	1	1	1	1	1	1	1	1	1	1	1	160	160	11.2	11.2	11.2
	1.55079	0.0281327	-0.534168	0.690557	Tb927.10.12530:mRNA-p1	Tb927.10.12530:mRNA-p1	Tb927.10.12530:mRNA-p1 | transcript=Tb927.10.12530:mRNA | gene=Tb927.10.12530 | organism=Trypanosoma_brucei_brucei_TREU927 | gene_product=chaperone protein DnaJ, putative | transcript_product=chaperone protein DnaJ, putative | location=Tb927_10_v5.1:304056	chaperone protein DnaJ	Tb927.10.12530	1	1	1	9	9	9	18.537	0	3.1659	15314000	7	1	1	0	1	1	1	1	1	1	1	0	1	1	1	1	1	1	1	0	1	1	1	1	1	166	166	9	9	0
	1.54497	0.0285121	-0.158748	0.895802	Tb927.10.8790:mRNA-p1	Tb927.10.8790:mRNA-p1	Tb927.10.8790:mRNA-p1 | transcript=Tb927.10.8790:mRNA | gene=Tb927.10.8790 | organism=Trypanosoma_brucei_brucei_TREU927 | gene_product=OTU-like cysteine protease, putative | transcript_product=OTU-like cysteine protease, putative | location=Tb927_10_v5.1:2	OTU-like cysteine protease	Tb927.10.8790	3	3	3	25.7	25.7	25.7	29.422	0	15.563	167810000	19	3	3	3	3	3	3	3	3	3	3	3	3	3	3	3	3	3	3	3	3	3	3	3	3	265	265	25.7	25.7	25.7
	1.54326	0.0286245	-0.0592036	0.959794	Tb927.11.5300:mRNA-p1	Tb927.11.5300:mRNA-p1	Tb927.11.5300:mRNA-p1 | transcript=Tb927.11.5300:mRNA | gene=Tb927.11.5300 | organism=Trypanosoma_brucei_brucei_TREU927 | gene_product=Kinesin-13 3, putative | transcript_product=Kinesin-13 3, putative | location=Tb927_11_v5.1:1510715-1512415(+) | protein_	Kinesin-13 3	Tb927.11.5300	22	22	22	51.6	51.6	51.6	62.524	0	156.52	1783200000	168	21	21	21	22	21	21	21	21	21	21	21	22	21	21	21	21	21	21	21	22	21	21	21	21	566	566	50.2	50.2	50.2
	1.53454	0.0292049	-0.163527	0.892839	Tb927.9.7770:mRNA-p1	Tb927.9.7770:mRNA-p1	Tb927.9.7770:mRNA-p1 | transcript=Tb927.9.7770:mRNA | gene=Tb927.9.7770 | organism=Trypanosoma_brucei_brucei_TREU927 | gene_product=spermidine synthase | transcript_product=spermidine synthase | location=Tb927_09_v5.1:1275756-1276652(-) | protein_length=29	spermidine synthase	Tb927.9.7770	13	13	13	51	51	51	32.926	0	95.689	4639700000	152	13	13	13	13	13	12	13	13	13	13	13	13	13	12	13	13	13	13	13	13	13	12	13	13	298	298	51	51	51
	1.53114	0.0294351	0.108693	1.07825	Tb927.9.6530:mRNA-p1	Tb927.9.6530:mRNA-p1	Tb927.9.6530:mRNA-p1 | transcript=Tb927.9.6530:mRNA | gene=Tb927.9.6530 | organism=Trypanosoma_brucei_brucei_TREU927 | gene_product=hypothetical protein | transcript_product=hypothetical protein | location=Tb927_09_v5.1:1072870-1075935(+) | protein_length=	hypothetical protein	Tb927.9.6530	21	21	21	30.9	30.9	30.9	113.29	0	73.648	830120000	136	18	17	19	19	20	19	18	20	18	17	19	19	20	19	18	20	18	17	19	19	20	19	18	20	1021	1021	25.2	23.1	27.6
	1.52808	0.0296431	-0.184708	0.879827	Tb927.2.3800:mRNA-p1	Tb927.2.3800:mRNA-p1	Tb927.2.3800:mRNA-p1 | transcript=Tb927.2.3800:mRNA | gene=Tb927.2.3800 | organism=Trypanosoma_brucei_brucei_TREU927 | gene_product=guide RNA associated protein 1 | transcript_product=guide RNA associated protein 1 | location=Tb927_02_v5.1:677639-679117(-)	guide RNA associated protein 1	Tb927.2.3800	15	15	15	42.9	42.9	42.9	55.46	0	117.76	775140000	75	14	13	14	13	14	14	14	15	14	13	14	13	14	14	14	15	14	13	14	13	14	14	14	15	492	492	40.7	37.8	40
	1.52793	0.029653	0.0855994	1.06113	Tb927.4.2070:mRNA-p1	Tb927.4.2070:mRNA-p1	Tb927.4.2070:mRNA-p1 | transcript=Tb927.4.2070:mRNA | gene=Tb927.4.2070 | organism=Trypanosoma_brucei_brucei_TREU927 | gene_product=antigenic protein, putative | transcript_product=antigenic protein, putative | location=Tb927_04_v5.1:517255-530622(-) | pro	antigenic protein	Tb927.4.2070	32	32	17	60.4	60.4	6.6	511.32	0	251.03	11638000000	299	31	29	30	30	29	30	31	30	31	29	30	30	29	30	31	30	17	17	17	17	17	17	17	17	4455	4455	60	57.7	58
	1.52357	0.029952	-0.710761	0.610998	Tb927.10.7470:mRNA-p1	Tb927.10.7470:mRNA-p1	Tb927.10.7470:mRNA-p1 | transcript=Tb927.10.7470:mRNA | gene=Tb927.10.7470 | organism=Trypanosoma_brucei_brucei_TREU927 | gene_product=RNA-binding protein, putative | transcript_product=RNA-binding protein, putative | location=Tb927_10_v5.1:1880389-1880742	RNA-binding protein	Tb927.10.7470	3	3	3	35.9	35.9	35.9	13.338	0	27.348	136970000	11	2	3	3	3	2	2	2	3	2	3	3	3	2	2	2	3	2	3	3	3	2	2	2	3	117	117	27.4	35.9	35.9
	1.52154	0.0300929	0.200786	1.14932	Tb927.10.9840:mRNA-p1	Tb927.10.9840:mRNA-p1	Tb927.10.9840:mRNA-p1 | transcript=Tb927.10.9840:mRNA | gene=Tb927.10.9840 | organism=Trypanosoma_brucei_brucei_TREU927 | gene_product=chaperone protein DnaJ, putative | transcript_product=chaperone protein DnaJ, putative | location=Tb927_10_v5.1:2433556-2	chaperone protein DnaJ	Tb927.10.9840	11	11	11	53.4	53.4	53.4	29.823	0	36.203	278570000	33	8	8	8	9	9	8	6	8	8	8	8	9	9	8	6	8	8	8	8	9	9	8	6	8	262	262	37.8	37.4	35.5
	1.51998	0.0302008	-0.132454	0.912278	Tb927.6.5010:mRNA-p1	Tb927.6.5010:mRNA-p1	Tb927.6.5010:mRNA-p1 | transcript=Tb927.6.5010:mRNA | gene=Tb927.6.5010 | organism=Trypanosoma_brucei_brucei_TREU927 | gene_product=hypothetical protein, conserved | transcript_product=hypothetical protein, conserved | location=Tb927_06_v5.1:1373762-137491	hypothetical protein	Tb927.6.5010	9	9	9	29.9	29.9	29.9	40.797	0	24.247	611050000	47	8	8	9	8	9	9	8	8	8	8	9	8	9	9	8	8	8	8	9	8	9	9	8	8	384	384	26.6	26.6	29.9
	1.51903	0.0302673	0.204002	1.15189	Tb927.11.9050:mRNA-p1	Tb927.11.9050:mRNA-p1	Tb927.11.9050:mRNA-p1 | transcript=Tb927.11.9050:mRNA | gene=Tb927.11.9050 | organism=Trypanosoma_brucei_brucei_TREU927 | gene_product=p21-C-terminal region-binding protein, putative | transcript_product=p21-C-terminal region-binding protein, putative | lo	p21-C-terminal region-binding protein	Tb927.11.9050	10	10	10	32.5	32.5	32.5	44.583	0	44.778	277870000	60	9	9	9	9	9	9	9	9	9	9	9	9	9	9	9	9	9	9	9	9	9	9	9	9	397	397	28.7	28.7	28.7
	1.51822	0.0303236	-0.391747	0.762206	Tb927.11.15460:mRNA-p1	Tb927.11.15460:mRNA-p1	Tb927.11.15460:mRNA-p1 | transcript=Tb927.11.15460:mRNA | gene=Tb927.11.15460 | organism=Trypanosoma_brucei_brucei_TREU927 | gene_product=ATP-dependent DEAD/H RNA helicase, putative | transcript_product=ATP-dependent DEAD/H RNA helicase, putative | locatio	ATP-dependent DEAD/H RNA helicase	Tb927.11.15460	5	5	5	12.1	12.1	12.1	80.604	0	9.5537	41120000	8	4	4	3	4	3	3	4	4	4	4	3	4	3	3	4	4	4	4	3	4	3	3	4	4	725	725	9	9	6.5
	1.51331	0.0306681	-0.0785341	0.947019	Tb927.10.3210:mRNA-p1	Tb927.10.3210:mRNA-p1	Tb927.10.3210:mRNA-p1 | transcript=Tb927.10.3210:mRNA | gene=Tb927.10.3210 | organism=Trypanosoma_brucei_brucei_TREU927 | gene_product=delta-1-pyrroline-5-carboxylate dehydrogenase, putative | transcript_product=delta-1-pyrroline-5-carboxylate dehydrogenas	delta-1-pyrroline-5-carboxylate dehydrogenase	Tb927.10.3210	28	28	28	64.5	64.5	64.5	62.036	0	186.78	9033100000	338	28	28	28	28	28	28	28	28	28	28	28	28	28	28	28	28	28	28	28	28	28	28	28	28	561	561	64.5	64.5	64.5
	1.51291	0.0306963	-0.0614491	0.958301	Tb927.5.4500:mRNA-p1;Tb05.5K5.150:mRNA-p1	Tb927.5.4500:mRNA-p1;Tb05.5K5.150:mRNA-p1	Tb927.5.4500:mRNA-p1 | transcript=Tb927.5.4500:mRNA | gene=Tb927.5.4500 | organism=Trypanosoma_brucei_brucei_TREU927 | gene_product=ras-like small GTPase, putative | transcript_product=ras-like small GTPase, putative | location=Tb927_05_v5.1:1383439-138402	ras-like small GTPase	Tb927.5.4500	11	11	11	82	82	82	21.771	0	119.83	4999800000	162	10	10	10	11	10	10	10	10	10	10	10	11	10	10	10	10	10	10	10	11	10	10	10	10	194	NaN	72.7	72.7	72.7
	1.50244	0.0314453	-0.0947795	0.936415	Tb927.3.3580:mRNA-p1	Tb927.3.3580:mRNA-p1	Tb927.3.3580:mRNA-p1 | transcript=Tb927.3.3580:mRNA | gene=Tb927.3.3580 | organism=Trypanosoma_brucei_brucei_TREU927 | gene_product=heat shock protein 90, putative | transcript_product=heat shock protein 90, putative | location=Tb927_03_v5.1:1006678-100899	heat shock protein 90	Tb927.3.3580	29	29	29	42.3	42.3	42.3	87.766	0	260.67	10693000000	340	27	27	28	26	28	28	29	27	27	27	28	26	28	28	29	27	27	27	28	26	28	28	29	27	773	773	39.7	39.7	40.8
	1.50092	0.031556	-0.126031	0.916349	Tb927.2.830:pseudogenic_transcript-p1;Tb11.v5.0655.1-p1	Tb927.2.830:pseudogenic_transcript-p1;Tb11.v5.0655.1-p1	Tb927.2.830:pseudogenic_transcript-p1 | transcript=Tb927.2.830:pseudogenic_transcript | gene=Tb927.2.830 | organism=Trypanosoma_brucei_brucei_TREU927 | gene_product=retrotransposon hot spot protein 1 (RHS1), interrupted | transcript_product=retrotransposon	retrotransposon hot spot protein 1 (RHS1)	Tb927.2.830	16	10	7	56.2	37.5	27.8	40.504	0	56.391	401550000	55	15	15	13	14	14	14	14	15	10	9	8	9	9	9	9	9	7	6	5	6	6	6	6	6	352	NaN	53.7	54.3	47.7
	1.49819	0.0317546	-0.145663	0.903964	Tb927.6.3050:mRNA-p1	Tb927.6.3050:mRNA-p1	Tb927.6.3050:mRNA-p1 | transcript=Tb927.6.3050:mRNA | gene=Tb927.6.3050 | organism=Trypanosoma_brucei_brucei_TREU927 | gene_product=Aldehyde dehydrogenase 3, putative | transcript_product=Aldehyde dehydrogenase 3, putative | location=Tb927_06_v5.1:904935-9	Aldehyde dehydrogenase 3	Tb927.6.3050	19	19	19	44.8	44.8	44.8	59.689	0	93.111	1119500000	124	18	15	17	16	16	15	18	17	18	15	17	16	16	15	18	17	18	15	17	16	16	15	18	17	543	543	39.8	34.3	40.9
	1.49692	0.0318478	0.198568	1.14756	Tb927.8.3590:mRNA-p1	Tb927.8.3590:mRNA-p1	Tb927.8.3590:mRNA-p1 | transcript=Tb927.8.3590:mRNA | gene=Tb927.8.3590 | organism=Trypanosoma_brucei_brucei_TREU927 | gene_product=hypothetical protein, conserved | transcript_product=hypothetical protein, conserved | location=Tb927_08_v5.1:1078979-108093	hypothetical protein	Tb927.8.3590	3	3	3	6.1	6.1	6.1	72.24	0	5.138	20864000	14	3	2	2	2	2	3	3	2	3	2	2	2	2	3	3	2	3	2	2	2	2	3	3	2	652	652	6.1	4	4
	1.49642	0.0318843	0.0784354	1.05587	Tb927.8.6660:mRNA-p1	Tb927.8.6660:mRNA-p1	Tb927.8.6660:mRNA-p1 | transcript=Tb927.8.6660:mRNA | gene=Tb927.8.6660 | organism=Trypanosoma_brucei_brucei_TREU927 | gene_product=paraflagellar rod component, putative | transcript_product=paraflagellar rod component, putative | location=Tb927_08_v5.1:19	paraflagellar rod component	Tb927.8.6660	28	28	28	61.1	61.1	61.1	69.055	0	235.88	13140000000	427	28	27	27	26	28	28	28	28	28	27	27	26	28	28	28	28	28	27	27	26	28	28	28	28	607	607	61.1	59.5	59.5
	1.49292	0.0321422	-0.0926156	0.937821	Tb927.11.8210:mRNA-p1;Tb11.v5.0572.1-p1;Tb11.v5.0573.1-p1	Tb927.11.8210:mRNA-p1	Tb927.11.8210:mRNA-p1 | transcript=Tb927.11.8210:mRNA | gene=Tb927.11.8210 | organism=Trypanosoma_brucei_brucei_TREU927 | gene_product=RAD50 DNA repair-like protein | transcript_product=RAD50 DNA repair-like protein | location=Tb927_11_v5.1:2306956-2311005	RAD50 DNA repair-like protein	Tb927.11.8210	28	28	28	25	25	25	152.77	0	42.621	1071700000	58	20	20	23	23	19	22	23	23	20	20	23	23	19	22	23	23	20	20	23	23	19	22	23	23	1349	NaN	19.4	16.8	21.3
	1.49261	0.0321657	0.298651	1.22999	Tb927.4.890:mRNA-p1	Tb927.4.890:mRNA-p1	Tb927.4.890:mRNA-p1 | transcript=Tb927.4.890:mRNA | gene=Tb927.4.890 | organism=Trypanosoma_brucei_brucei_TREU927 | gene_product=small nuclear ribonucleoprotein sm d3 | transcript_product=small nuclear ribonucleoprotein sm d3 | location=Tb927_04_v5.1:25530	small nuclear ribonucleoprotein sm d3	Tb927.4.890	2	2	2	36.5	36.5	36.5	12.363	0	18.005	54431000	17	2	2	2	2	2	2	2	2	2	2	2	2	2	2	2	2	2	2	2	2	2	2	2	2	115	115	36.5	36.5	36.5
	1.49041	0.0323289	-0.241731	0.84573	Tb927.8.1230:mRNA-p1	Tb927.8.1230:mRNA-p1	Tb927.8.1230:mRNA-p1 | transcript=Tb927.8.1230:mRNA | gene=Tb927.8.1230 | organism=Trypanosoma_brucei_brucei_TREU927 | gene_product=hypothetical protein, conserved | transcript_product=hypothetical protein, conserved | location=Tb927_08_v5.1:389676-390227(	hypothetical protein	Tb927.8.1230	3	3	3	12.6	12.6	12.6	19.777	0	4.7776	253680000	20	3	3	3	3	3	2	3	2	3	3	3	3	3	2	3	2	3	3	3	3	3	2	3	2	183	183	12.6	12.6	12.6
	1.48887	0.0324438	-0.402953	0.756309	Tb927.11.13590:mRNA-p1	Tb927.11.13590:mRNA-p1	Tb927.11.13590:mRNA-p1 | transcript=Tb927.11.13590:mRNA | gene=Tb927.11.13590 | organism=Trypanosoma_brucei_brucei_TREU927 | gene_product=hypothetical protein, conserved | transcript_product=hypothetical protein, conserved | location=Tb927_11_v5.1:3629555-	hypothetical protein	Tb927.11.13590	2	2	2	19.5	19.5	19.5	15.576	0	4.6665	22367000	6	2	2	2	2	2	2	2	2	2	2	2	2	2	2	2	2	2	2	2	2	2	2	2	2	133	133	19.5	19.5	19.5
	1.4879	0.0325164	-0.312383	0.80531	Tb927.9.15870:mRNA-p1;Tb09.v4.0109:mRNA-p1;Tb09.v4.0015:mRNA-p1	Tb927.9.15870:mRNA-p1;Tb09.v4.0109:mRNA-p1;Tb09.v4.0015:mRNA-p1	Tb927.9.15870:mRNA-p1 | transcript=Tb927.9.15870:mRNA | gene=Tb927.9.15870 | organism=Trypanosoma_brucei_brucei_TREU927 | gene_product=hypothetical protein | transcript_product=hypothetical protein | location=Tb927_09_v5.1:2511585-2512283(-) | protein_leng	hypothetical protein	Tb927.9.15870	1	1	1	6	6	6	25.1	0.0030726	1.6502	8367800	3	1	1	0	1	1	1	1	1	1	1	0	1	1	1	1	1	1	1	0	1	1	1	1	1	232	NaN	6	6	0
	1.48736	0.0325563	-0.122798	0.918404	Tb927.8.6200:mRNA-p1	Tb927.8.6200:mRNA-p1	Tb927.8.6200:mRNA-p1 | transcript=Tb927.8.6200:mRNA | gene=Tb927.8.6200 | organism=Trypanosoma_brucei_brucei_TREU927 | gene_product=tubulin folding cofactor D, putative | transcript_product=tubulin folding cofactor D, putative | location=Tb927_08_v5.1:1802	tubulin folding cofactor D	Tb927.8.6200	10	10	10	10.9	10.9	10.9	147.63	0	26.202	118160000	38	7	9	8	8	8	8	8	8	7	9	8	8	8	8	8	8	7	9	8	8	8	8	8	8	1343	1343	7.4	9.6	8.9
	1.4865	0.0326208	-0.612426	0.654096	Tb927.8.5490:mRNA-p1	Tb927.8.5490:mRNA-p1	Tb927.8.5490:mRNA-p1 | transcript=Tb927.8.5490:mRNA | gene=Tb927.8.5490 | organism=Trypanosoma_brucei_brucei_TREU927 | gene_product=Nucleolar protein,Nop52, putative | transcript_product=Nucleolar protein,Nop52, putative | location=Tb927_08_v5.1:1624945-16	Nucleolar protein	Tb927.8.5490	4	4	4	7.1	7.1	7.1	71.722	0	5.5159	31916000	9	3	3	3	4	3	3	3	3	3	3	3	4	3	3	3	3	3	3	3	4	3	3	3	3	623	623	5.6	5.6	5.6
	1.48487	0.0327436	-0.0717649	0.951473	Tb927.9.10010:mRNA-p1	Tb927.9.10010:mRNA-p1	Tb927.9.10010:mRNA-p1 | transcript=Tb927.9.10010:mRNA | gene=Tb927.9.10010 | organism=Trypanosoma_brucei_brucei_TREU927 | gene_product=chaperone protein DnaJ, putative | transcript_product=chaperone protein DnaJ, putative | location=Tb927_09_v5.1:1583566-1	chaperone protein DnaJ	Tb927.9.10010	18	18	18	42.9	42.9	42.9	56.711	0	79.362	2589800000	137	16	17	18	18	15	17	17	17	16	17	18	18	15	17	17	17	16	17	18	18	15	17	17	17	490	490	40.2	41.8	42.9
	1.48304	0.0328819	-0.24318	0.844881	Tb927.9.2550:mRNA-p1	Tb927.9.2550:mRNA-p1	Tb927.9.2550:mRNA-p1 | transcript=Tb927.9.2550:mRNA | gene=Tb927.9.2550 | organism=Trypanosoma_brucei_brucei_TREU927 | gene_product=Domain of unknown function (DUF4457), putative | transcript_product=Domain of unknown function (DUF4457), putative | locatio	Domain of unknown function (DUF4457)	Tb927.9.2550	5	5	5	8.8	8.8	8.8	113.57	0	18.495	85567000	16	4	4	5	4	4	4	4	4	4	4	5	4	4	4	4	4	4	4	5	4	4	4	4	4	1042	1042	6.8	7	8.8
	1.48126	0.0330169	-0.189973	0.876622	Tb927.10.8200:mRNA-p1	Tb927.10.8200:mRNA-p1	Tb927.10.8200:mRNA-p1 | transcript=Tb927.10.8200:mRNA | gene=Tb927.10.8200 | organism=Trypanosoma_brucei_brucei_TREU927 | gene_product=Ribosomal protein L1p/L10e family, putative | transcript_product=Ribosomal protein L1p/L10e family, putative | location=T	Ribosomal protein L1p/L10e family	Tb927.10.8200	11	11	11	56.1	56.1	56.1	30.838	0	60.587	682130000	56	11	10	9	10	10	10	10	10	11	10	9	10	10	10	10	10	11	10	9	10	10	10	10	10	269	269	56.1	53.5	49.4
	1.4799	0.0331204	-0.462644	0.725655	Tb927.11.1260:mRNA-p1	Tb927.11.1260:mRNA-p1	Tb927.11.1260:mRNA-p1 | transcript=Tb927.11.1260:mRNA | gene=Tb927.11.1260 | organism=Trypanosoma_brucei_brucei_TREU927 | gene_product=copper-transporting ATPase-like protein, putative | transcript_product=copper-transporting ATPase-like protein, putative	copper-transporting ATPase-like protein	Tb927.11.1260	2	2	2	2.1	2.1	2.1	102.34	0	3.3514	16249000	7	2	1	0	2	2	2	2	1	2	1	0	2	2	2	2	1	2	1	0	2	2	2	2	1	961	961	2.1	0.8	0
	1.47373	0.0335947	0.190704	1.14132	Tb927.11.8260:mRNA-p1	Tb927.11.8260:mRNA-p1	Tb927.11.8260:mRNA-p1 | transcript=Tb927.11.8260:mRNA | gene=Tb927.11.8260 | organism=Trypanosoma_brucei_brucei_TREU927 | gene_product=carbonic anhydrase-like protein | transcript_product=carbonic anhydrase-like protein | location=Tb927_11_v5.1:2321078-232	carbonic anhydrase-like protein	Tb927.11.8260	12	12	12	37.4	37.4	37.4	45.777	0	52.819	728720000	73	11	12	12	11	12	11	11	10	11	12	12	11	12	11	11	10	11	12	12	11	12	11	11	10	422	422	33.4	37.4	37.4
	1.47149	0.0337684	-0.406423	0.754492	Tb927.11.3440:mRNA-p1	Tb927.11.3440:mRNA-p1	Tb927.11.3440:mRNA-p1 | transcript=Tb927.11.3440:mRNA | gene=Tb927.11.3440 | organism=Trypanosoma_brucei_brucei_TREU927 | gene_product=hypothetical protein, conserved | transcript_product=hypothetical protein, conserved | location=Tb927_11_v5.1:1016595-101	hypothetical protein	Tb927.11.3440	3	3	3	6.2	6.2	6.2	58.165	0	2.851	16615000	9	2	1	1	2	2	3	2	2	2	1	1	2	2	3	2	2	2	1	1	2	2	3	2	2	530	530	4.3	2.3	2.3
	1.46736	0.0340907	0.0678549	1.04816	Tb927.2.3580:mRNA-p1	Tb927.2.3580:mRNA-p1	Tb927.2.3580:mRNA-p1 | transcript=Tb927.2.3580:mRNA | gene=Tb927.2.3580 | organism=Trypanosoma_brucei_brucei_TREU927 | gene_product=transcription elongation factor s-II, putative | transcript_product=transcription elongation factor s-II, putative | locatio	transcription elongation factor s-II	Tb927.2.3580	21	21	21	56.1	56.1	56.1	52.172	0	88.735	1659800000	132	19	20	21	19	21	19	20	20	19	20	21	19	21	19	20	20	19	20	21	19	21	19	20	20	467	467	54	55.9	56.1
	1.4645	0.034316	-0.229057	0.853192	Tb927.3.2470:mRNA-p1	Tb927.3.2470:mRNA-p1	Tb927.3.2470:mRNA-p1 | transcript=Tb927.3.2470:mRNA | gene=Tb927.3.2470 | organism=Trypanosoma_brucei_brucei_TREU927 | gene_product=Pumilio homology domain family member 8 | transcript_product=Pumilio homology domain family member 8 | location=Tb927_03_v5.	Pumilio homology domain family member 8	Tb927.3.2470	11	11	11	25.2	25.2	25.2	69.055	0	44.917	376400000	42	9	10	9	10	9	10	10	9	9	10	9	10	9	10	10	9	9	10	9	10	9	10	10	9	604	604	22.5	24	18.2
	1.45442	0.0351218	0.080267	1.05721	Tb927.11.2570:mRNA-p1	Tb927.11.2570:mRNA-p1	Tb927.11.2570:mRNA-p1 | transcript=Tb927.11.2570:mRNA | gene=Tb927.11.2570 | organism=Trypanosoma_brucei_brucei_TREU927 | gene_product=hypothetical protein, conserved | transcript_product=hypothetical protein, conserved | location=Tb927_11_v5.1:754151-7558	hypothetical protein	Tb927.11.2570	29	29	29	64.9	64.9	64.9	63.115	0	97.752	1064500000	137	23	26	28	23	25	25	25	25	23	26	28	23	25	25	25	25	23	26	28	23	25	25	25	25	573	573	51	61.4	63.2
	1.45354	0.0351933	-0.594251	0.662388	Tb927.8.3600:mRNA-p1	Tb927.8.3600:mRNA-p1	Tb927.8.3600:mRNA-p1 | transcript=Tb927.8.3600:mRNA | gene=Tb927.8.3600 | organism=Trypanosoma_brucei_brucei_TREU927 | gene_product=hypothetical protein, conserved | transcript_product=hypothetical protein, conserved | location=Tb927_08_v5.1:1081477-108181	hypothetical protein	Tb927.8.3600	1	1	1	10.7	10.7	10.7	12.613	0.001912	1.7935	6833400	3	0	1	1	1	1	0	1	1	0	1	1	1	1	0	1	1	0	1	1	1	1	0	1	1	112	112	0	10.7	10.7
	1.45175	0.035339	-0.23721	0.848385	Tb927.11.2510:mRNA-p1	Tb927.11.2510:mRNA-p1	Tb927.11.2510:mRNA-p1 | transcript=Tb927.11.2510:mRNA | gene=Tb927.11.2510 | organism=Trypanosoma_brucei_brucei_TREU927 | gene_product=NUC173 domain containing protein, putative | transcript_product=NUC173 domain containing protein, putative | location=Tb9	NUC173 domain containing protein	Tb927.11.2510	10	10	10	9	9	9	145.69	0	16.249	126860000	29	8	7	9	8	7	8	8	9	8	7	9	8	7	8	8	9	8	7	9	8	7	8	8	9	1292	1292	7.2	5.8	7.8
	1.44983	0.0354954	0.24668	1.18647	Tb927.5.3020:mRNA-p1	Tb927.5.3020:mRNA-p1	Tb927.5.3020:mRNA-p1 | transcript=Tb927.5.3020:mRNA | gene=Tb927.5.3020 | organism=Trypanosoma_brucei_brucei_TREU927 | gene_product=hypothetical protein, conserved | transcript_product=hypothetical protein, conserved | location=Tb927_05_v5.1:1003563-100482	hypothetical protein	Tb927.5.3020	2	2	2	14.8	14.8	14.8	45.935	0	6.3891	30873000	9	2	2	2	2	2	2	2	2	2	2	2	2	2	2	2	2	2	2	2	2	2	2	2	2	420	420	14.8	14.8	14.8
	1.44925	0.0355424	-0.173335	0.886791	Tb927.10.7200:mRNA-p1	Tb927.10.7200:mRNA-p1	Tb927.10.7200:mRNA-p1 | transcript=Tb927.10.7200:mRNA | gene=Tb927.10.7200 | organism=Trypanosoma_brucei_brucei_TREU927 | gene_product=TPR repeat, putative | transcript_product=TPR repeat, putative | location=Tb927_10_v5.1:1810710-1813250(-) | protein_leng	TPR repeat	Tb927.10.7200	9	9	9	11	11	11	93.195	0	16.914	136800000	31	7	8	8	6	7	7	6	7	7	8	8	6	7	7	6	7	7	8	8	6	7	7	6	7	846	846	8.3	9.2	9.2
	1.44177	0.0361605	-0.119633	0.920422	Tb927.3.3110:mRNA-p1	Tb927.3.3110:mRNA-p1	Tb927.3.3110:mRNA-p1 | transcript=Tb927.3.3110:mRNA | gene=Tb927.3.3110 | organism=Trypanosoma_brucei_brucei_TREU927 | gene_product=Condensin complex subunit 3, putative | transcript_product=Condensin complex subunit 3, putative | location=Tb927_03_v5.1:79	Condensin complex subunit 3	Tb927.3.3110	13	13	13	14.2	14.2	14.2	118.8	0	22.332	238830000	42	11	12	12	10	10	9	9	9	11	12	12	10	10	9	9	9	11	12	12	10	10	9	9	9	1061	1061	12.3	13.6	13.3
	1.44085	0.0362372	-0.211452	0.863668	Tb927.10.13100:mRNA-p1	Tb927.10.13100:mRNA-p1	Tb927.10.13100:mRNA-p1 | transcript=Tb927.10.13100:mRNA | gene=Tb927.10.13100 | organism=Trypanosoma_brucei_brucei_TREU927 | gene_product=Cytokinesis initiation factor 3 | transcript_product=Cytokinesis initiation factor 3 | location=Tb927_10_v5.1:3189375-	Cytokinesis initiation factor 3	Tb927.10.13100	6	6	6	14.8	14.8	14.8	50.915	0	8.2239	100850000	22	4	5	5	5	5	4	4	5	4	5	5	5	5	4	4	5	4	5	5	5	5	4	4	5	438	438	10.7	12.6	13
	1.43896	0.0363945	-0.180601	0.882335	Tb927.9.7670:mRNA-p1	Tb927.9.7670:mRNA-p1	Tb927.9.7670:mRNA-p1 | transcript=Tb927.9.7670:mRNA | gene=Tb927.9.7670 | organism=Trypanosoma_brucei_brucei_TREU927 | gene_product=hypothetical protein, conserved | transcript_product=hypothetical protein, conserved | location=Tb927_09_v5.1:1251064-125177	hypothetical protein	Tb927.9.7670	6	6	6	44.3	44.3	44.3	26.419	0	26.557	276390000	38	6	6	6	6	6	6	6	6	6	6	6	6	6	6	6	6	6	6	6	6	6	6	6	6	235	235	44.3	44.3	44.3
	1.43815	0.0364631	-0.120686	0.91975	Tb927.3.5070:mRNA-p1	Tb927.3.5070:mRNA-p1	Tb927.3.5070:mRNA-p1 | transcript=Tb927.3.5070:mRNA | gene=Tb927.3.5070 | organism=Trypanosoma_brucei_brucei_TREU927 | gene_product=hypothetical protein, conserved | transcript_product=hypothetical protein, conserved | location=Tb927_03_v5.1:1421239-142317	hypothetical protein	Tb927.3.5070	11	11	11	24	24	24	70.365	0	39.929	329740000	58	10	10	11	11	10	11	9	10	10	10	11	11	10	11	9	10	10	10	11	11	10	11	9	10	645	645	21.2	22.6	24
	1.43476	0.0367483	0.300982	1.23198	Tb927.3.2660:mRNA-p1	Tb927.3.2660:mRNA-p1	Tb927.3.2660:mRNA-p1 | transcript=Tb927.3.2660:mRNA | gene=Tb927.3.2660 | organism=Trypanosoma_brucei_brucei_TREU927 | gene_product=TatD related DNase, putative | transcript_product=TatD related DNase, putative | location=Tb927_03_v5.1:675209-677398(-) | p	TatD related DNase	Tb927.3.2660	4	4	4	7.7	7.7	7.7	78.744	0	6.8229	41465000	5	2	2	3	3	3	3	2	2	2	2	3	3	3	3	2	2	2	2	3	3	3	3	2	2	729	729	4	4	5.8
	1.43414	0.0368006	-0.353983	0.782421	Tb927.4.4610:mRNA-p1	Tb927.4.4610:mRNA-p1	Tb927.4.4610:mRNA-p1 | transcript=Tb927.4.4610:mRNA | gene=Tb927.4.4610 | organism=Trypanosoma_brucei_brucei_TREU927 | gene_product=LSU ribosomal protein, mitochondrial, putative | transcript_product=LSU ribosomal protein, mitochondrial, putative | locatio	LSU ribosomal protein	Tb927.4.4610	3	3	3	16.6	16.6	16.6	34.626	0	3.8191	43626000	3	3	2	3	3	3	2	3	3	3	2	3	3	3	2	3	3	3	2	3	3	3	2	3	3	319	319	16.6	9.1	16.6
	1.43247	0.0369431	-0.17437	0.886154	Tb927.10.12500:mRNA-p1	Tb927.10.12500:mRNA-p1	Tb927.10.12500:mRNA-p1 | transcript=Tb927.10.12500:mRNA | gene=Tb927.10.12500 | organism=Trypanosoma_brucei_brucei_TREU927 | gene_product=P-type H+-ATPase, putative | transcript_product=P-type H+-ATPase, putative | location=Tb927_10_v5.1:3030942-3033680(-)	P-type H+-ATPase	Tb927.10.12500	31	5	5	42.8	7.5	7.5	100.23	0	24.685	198290000	45	29	29	29	27	29	29	29	30	5	5	5	4	5	5	4	5	5	5	5	4	5	5	4	5	912	912	39.9	39.9	39.9
	1.43183	0.0369975	0.154596	1.11311	Tb927.3.2220:mRNA-p1	Tb927.3.2220:mRNA-p1	Tb927.3.2220:mRNA-p1 | transcript=Tb927.3.2220:mRNA | gene=Tb927.3.2220 | organism=Trypanosoma_brucei_brucei_TREU927 | gene_product=eukaryotic translation initiation factor 3 subunit j | transcript_product=eukaryotic translation initiation factor 3 subunit	eukaryotic translation initiation factor 3 subunit j	Tb927.3.2220	6	6	6	29.5	29.5	29.5	23.8	0	18.851	273570000	33	4	5	5	4	5	5	3	5	4	5	5	4	5	5	3	5	4	5	5	4	5	5	3	5	220	220	23.6	29.5	23.6
	1.42674	0.037433	-0.144176	0.904896	Tb927.5.1490:mRNA-p1	Tb927.5.1490:mRNA-p1	Tb927.5.1490:mRNA-p1 | transcript=Tb927.5.1490:mRNA | gene=Tb927.5.1490 | organism=Trypanosoma_brucei_brucei_TREU927 | gene_product=Eukaryotic translation initiation factor 4 gamma 1 | transcript_product=Eukaryotic translation initiation factor 4 gamma 1 |	Eukaryotic translation initiation factor 4 gamma 1	Tb927.5.1490	7	7	7	10.9	10.9	10.9	122.1	0	8.8846	109910000	7	4	4	5	5	5	6	6	4	4	4	5	5	5	6	6	4	4	4	5	5	5	6	6	4	1118	1118	5.5	6.1	6.8
	1.4234	0.0377223	0.553572	1.46772	Tb927.2.6240:mRNA-p1;Tb927.2.6200:mRNA-p1;Tb927.2.6280:mRNA-p1;Tb927.9.7470:mRNA-p1;Tb927.6.220:mRNA-p1	Tb927.2.6240:mRNA-p1;Tb927.2.6200:mRNA-p1;Tb927.2.6280:mRNA-p1;Tb927.9.7470:mRNA-p1;Tb927.6.220:mRNA-p1	Tb927.2.6240:mRNA-p1 | transcript=Tb927.2.6240:mRNA | gene=Tb927.2.6240 | organism=Trypanosoma_brucei_brucei_TREU927 | gene_product=adenosine transporter 2 | transcript_product=adenosine transporter 2 | location=Tb927_02_v5.1:1138452-1139843(+) | protein_l	adenosine transporter 2	Tb927.2.6240	2	1	1	5.2	3	3	51.05	0	3.0904	21026000	8	2	2	2	2	2	2	2	2	1	1	1	1	1	1	1	1	1	1	1	1	1	1	1	1	463	NaN	5.2	5.2	5.2
	1.42025	0.0379972	-0.228379	0.853593	Tb927.6.2780:mRNA-p1	Tb927.6.2780:mRNA-p1	Tb927.6.2780:mRNA-p1 | transcript=Tb927.6.2780:mRNA | gene=Tb927.6.2780 | organism=Trypanosoma_brucei_brucei_TREU927 | gene_product=U3 small nuclear ribonucleoprotein (snRNP), putative | transcript_product=U3 small nuclear ribonucleoprotein (snRNP), putati	U3 small nuclear ribonucleoprotein (snRNP)	Tb927.6.2780	9	9	9	42.9	42.9	42.9	33.287	0	16.959	175270000	40	7	6	6	6	7	6	7	8	7	6	6	6	7	6	7	8	7	6	6	6	7	6	7	8	287	287	34.5	30.7	29.6
	1.41701	0.0382816	-0.132841	0.912034	Tb927.11.13370:mRNA-p1	Tb927.11.13370:mRNA-p1	Tb927.11.13370:mRNA-p1 | transcript=Tb927.11.13370:mRNA | gene=Tb927.11.13370 | organism=Trypanosoma_brucei_brucei_TREU927 | gene_product=hypothetical protein, conserved | transcript_product=hypothetical protein, conserved | location=Tb927_11_v5.1:3584049-	hypothetical protein	Tb927.11.13370	2	2	2	9.6	9.6	9.6	31.791	0.00049225	2.2591	7084200	3	1	2	1	1	1	1	1	1	1	2	1	1	1	1	1	1	1	2	1	1	1	1	1	1	282	282	5	9.6	5
	1.41459	0.0384956	-0.18582	0.879149	Tb927.7.2160:mRNA-p1	Tb927.7.2160:mRNA-p1	Tb927.7.2160:mRNA-p1 | transcript=Tb927.7.2160:mRNA | gene=Tb927.7.2160 | organism=Trypanosoma_brucei_brucei_TREU927 | gene_product=hypothetical protein, conserved | transcript_product=hypothetical protein, conserved | location=Tb927_07_v5.1:557952-558977(	hypothetical protein	Tb927.7.2160	9	9	9	35.2	35.2	35.2	37.233	0	30.209	329900000	55	8	7	8	7	8	8	7	7	8	7	8	7	8	8	7	7	8	7	8	7	8	8	7	7	341	341	32.3	25.5	28.4
	1.41075	0.0388377	-0.112299	0.925112	Tb927.4.3320:mRNA-p1	Tb927.4.3320:mRNA-p1	Tb927.4.3320:mRNA-p1 | transcript=Tb927.4.3320:mRNA | gene=Tb927.4.3320 | organism=Trypanosoma_brucei_brucei_TREU927 | gene_product=uracil phosphoribosyltransferase, putative | transcript_product=uracil phosphoribosyltransferase, putative | location=Tb927_	uracil phosphoribosyltransferase	Tb927.4.3320	11	11	11	70.8	70.8	70.8	27.031	0	92.419	1490000000	114	10	11	11	11	11	10	11	11	10	11	11	11	11	10	11	11	10	11	11	11	11	10	11	11	240	240	58.8	70.8	70.8
	1.40886	0.039007	0.107261	1.07718	Tb927.10.4000:mRNA-p1	Tb927.10.4000:mRNA-p1	Tb927.10.4000:mRNA-p1 | transcript=Tb927.10.4000:mRNA | gene=Tb927.10.4000 | organism=Trypanosoma_brucei_brucei_TREU927 | gene_product=methylglutaconyl-CoA hydratase, mitochondrial precursor, putative | transcript_product=methylglutaconyl-CoA hydratase, mi	methylglutaconyl-CoA hydratase	Tb927.10.4000	8	8	8	43	43	43	29.195	0	29.883	307390000	47	8	8	8	8	6	8	6	8	8	8	8	8	6	8	6	8	8	8	8	8	6	8	6	8	277	277	43	43	43
	1.40836	0.0390513	-0.371035	0.773228	Tb927.11.6720:mRNA-p1	Tb927.11.6720:mRNA-p1	Tb927.11.6720:mRNA-p1 | transcript=Tb927.11.6720:mRNA | gene=Tb927.11.6720 | organism=Trypanosoma_brucei_brucei_TREU927 | gene_product=mRNA cap guanine-N7 methyltransferase, putative | transcript_product=mRNA cap guanine-N7 methyltransferase, putative | lo	mRNA cap guanine-N7 methyltransferase	Tb927.11.6720	5	5	5	7.1	7.1	7.1	117.56	0	8.4653	88938000	14	4	5	4	5	4	5	4	5	4	5	4	5	4	5	4	5	4	5	4	5	4	5	4	5	1057	1057	5.7	7.1	6
	1.40724	0.0391527	-0.212789	0.862867	Tb927.3.1020:mRNA-p1	Tb927.3.1020:mRNA-p1	Tb927.3.1020:mRNA-p1 | transcript=Tb927.3.1020:mRNA | gene=Tb927.3.1020 | organism=Trypanosoma_brucei_brucei_TREU927 | gene_product=Flagellum attachment zone protein 13 | transcript_product=Flagellum attachment zone protein 13 | location=Tb927_03_v5.1:2510	Flagellum attachment zone protein 13	Tb927.3.1020	6	6	6	14.4	14.4	14.4	54.34	0	10.708	130550000	25	4	5	4	4	5	4	5	4	4	5	4	4	5	4	5	4	4	5	4	4	5	4	5	4	493	493	9.5	11.8	8.7
	1.40696	0.0391777	-0.116125	0.922662	Tb927.11.7900:mRNA-p1	Tb927.11.7900:mRNA-p1	Tb927.11.7900:mRNA-p1 | transcript=Tb927.11.7900:mRNA | gene=Tb927.11.7900 | organism=Trypanosoma_brucei_brucei_TREU927 | gene_product=mitochondrial RNA binding protein 16 | transcript_product=mitochondrial RNA binding protein 16 | location=Tb927_11_v5.1:2	mitochondrial RNA binding protein 16	Tb927.11.7900	8	8	8	56	56	56	15.118	0	29.92	1701300000	92	8	8	8	8	8	8	8	8	8	8	8	8	8	8	8	8	8	8	8	8	8	8	8	8	141	141	56	56	56
	1.40566	0.0392952	-0.402974	0.756298	Tb927.11.5420:mRNA-p1	Tb927.11.5420:mRNA-p1	Tb927.11.5420:mRNA-p1 | transcript=Tb927.11.5420:mRNA | gene=Tb927.11.5420 | organism=Trypanosoma_brucei_brucei_TREU927 | gene_product=hypothetical protein, conserved | transcript_product=hypothetical protein, conserved | location=Tb927_11_v5.1:1541385-154	hypothetical protein	Tb927.11.5420	1	1	1	3.6	3.6	3.6	37.404	0.0030538	1.5482	5806200	1	0	1	0	1	0	1	1	0	0	1	0	1	0	1	1	0	0	1	0	1	0	1	1	0	330	330	0	3.6	0
	1.40482	0.0393711	-0.546252	0.684797	Tb927.9.7710:mRNA-p1	Tb927.9.7710:mRNA-p1	Tb927.9.7710:mRNA-p1 | transcript=Tb927.9.7710:mRNA | gene=Tb927.9.7710 | organism=Trypanosoma_brucei_brucei_TREU927 | gene_product=hypothetical protein, conserved | transcript_product=hypothetical protein, conserved | location=Tb927_09_v5.1:1263208-126378	hypothetical protein	Tb927.9.7710	2	2	2	24.1	24.1	24.1	20.39	0	8.9432	119410000	7	2	2	2	2	2	2	2	2	2	2	2	2	2	2	2	2	2	2	2	2	2	2	2	2	191	191	24.1	24.1	24.1
	1.39298	0.0404595	-0.863296	0.549695	Tb927.6.2980:mRNA-p1	Tb927.6.2980:mRNA-p1	Tb927.6.2980:mRNA-p1 | transcript=Tb927.6.2980:mRNA | gene=Tb927.6.2980 | organism=Trypanosoma_brucei_brucei_TREU927 | gene_product=Eukaryotic translation initiation factor 2-alpha kinase 3, putative | transcript_product=Eukaryotic translation initiation f	Eukaryotic translation initiation factor 2-alpha kinase 3	Tb927.6.2980	2	2	2	2.8	2.8	2.8	112.93	0.009948	1.0594	16654000	1	1	2	1	2	2	1	2	2	1	2	1	2	2	1	2	2	1	2	1	2	2	1	2	2	1025	1025	1.6	2.8	1.3
	1.39281	0.0404753	-0.147643	0.902724	Tb927.4.3450:mRNA-p1	Tb927.4.3450:mRNA-p1	Tb927.4.3450:mRNA-p1 | transcript=Tb927.4.3450:mRNA | gene=Tb927.4.3450 | organism=Trypanosoma_brucei_brucei_TREU927 | gene_product=Mitochondrial ATP synthase subunit, putative | transcript_product=Mitochondrial ATP synthase subunit, putative | location=Tb	Mitochondrial ATP synthase subunit	Tb927.4.3450	2	2	2	29.8	29.8	29.8	13.735	0	44.598	236540000	22	2	2	2	2	1	2	2	2	2	2	2	2	1	2	2	2	2	2	2	2	1	2	2	2	114	114	29.8	29.8	29.8
	1.3904	0.0407002	-0.248115	0.841996	Tb927.10.5130:mRNA-p1	Tb927.10.5130:mRNA-p1	Tb927.10.5130:mRNA-p1 | transcript=Tb927.10.5130:mRNA | gene=Tb927.10.5130 | organism=Trypanosoma_brucei_brucei_TREU927 | gene_product=Protein C21orf2 homolog, putative | transcript_product=Protein C21orf2 homolog, putative | location=Tb927_10_v5.1:1259784	Protein C21orf2 homolog	Tb927.10.5130	5	5	5	25.5	25.5	25.5	30.646	0	11.181	65573000	15	5	4	5	5	4	5	5	4	5	4	5	5	4	5	5	4	5	4	5	5	4	5	5	4	275	275	25.5	18.2	25.5
	1.38877	0.0408534	-0.0923934	0.937965	Tb927.8.1960:mRNA-p1	Tb927.8.1960:mRNA-p1	Tb927.8.1960:mRNA-p1 | transcript=Tb927.8.1960:mRNA | gene=Tb927.8.1960 | organism=Trypanosoma_brucei_brucei_TREU927 | gene_product=CCR4-NOT transcription complex subunit 11 | transcript_product=CCR4-NOT transcription complex subunit 11 | location=Tb927_08	CCR4-NOT transcription complex subunit 11	Tb927.8.1960	17	17	17	45.4	45.4	45.4	48.425	0	48.383	1124800000	123	16	15	16	16	14	15	17	15	16	15	16	16	14	15	17	15	16	15	16	16	14	15	17	15	434	434	43.1	40.3	42.2
	1.38822	0.0409055	0.230196	1.17299	Tb11.v5.0366.1-p1;Tb927.11.12880:mRNA-p1	Tb11.v5.0366.1-p1;Tb927.11.12880:mRNA-p1	Tb11.v5.0366.1-p1 | transcript=Tb11.v5.0366.1 | gene=Tb11.v5.0366 | organism=Trypanosoma_brucei_brucei_TREU927 | gene_product=hypothetical protein, conserved | transcript_product=hypothetical protein, conserved | location=Tb927_11_bin_v5.1:1226272-1229520(	hypothetical protein	Tb11.v5.0366	27	5	5	36	9.3	9.3	120.58	0	10.236	513210000	36	24	26	26	23	24	21	20	25	4	5	5	5	5	4	4	5	4	5	5	5	5	4	4	5	1082	NaN	32.9	35.3	35.2
	1.38689	0.0410306	-0.141744	0.906423	Tb927.10.4180:mRNA-p1	Tb927.10.4180:mRNA-p1	Tb927.10.4180:mRNA-p1 | transcript=Tb927.10.4180:mRNA | gene=Tb927.10.4180 | organism=Trypanosoma_brucei_brucei_TREU927 | gene_product=TFIIF-stimulated CTD phosphatase, putative | transcript_product=TFIIF-stimulated CTD phosphatase, putative | location=Tb9	TFIIF-stimulated CTD phosphatase	Tb927.10.4180	16	16	15	72.1	72.1	72.1	28.189	0	165.78	3756100000	150	15	16	15	15	15	15	15	16	15	16	15	15	15	15	15	16	14	15	14	14	14	14	14	15	247	247	68.8	72.1	68.4
	1.3859	0.0411242	-0.132748	0.912093	Tb927.10.10780:mRNA-p1	Tb927.10.10780:mRNA-p1	Tb927.10.10780:mRNA-p1 | transcript=Tb927.10.10780:mRNA | gene=Tb927.10.10780 | organism=Trypanosoma_brucei_brucei_TREU927 | gene_product=hypothetical protein, conserved | transcript_product=hypothetical protein, conserved | location=Tb927_10_v5.1:2622292-	hypothetical protein	Tb927.10.10780	3	3	3	16.4	16.4	16.4	23.3	0	5.0459	66501000	16	2	2	2	3	2	3	2	2	2	2	2	3	2	3	2	2	2	2	2	3	2	3	2	2	214	214	11.7	11.7	11.7
	1.3826	0.0414385	0.509844	1.4239	Tb927.7.4690:mRNA-p1;Tb11.v5.0153.1-p1	Tb927.7.4690:mRNA-p1;Tb11.v5.0153.1-p1	Tb927.7.4690:mRNA-p1 | transcript=Tb927.7.4690:mRNA | gene=Tb927.7.4690 | organism=Trypanosoma_brucei_brucei_TREU927 | gene_product=hypothetical protein | transcript_product=hypothetical protein | location=Tb927_07_v5.1:1247231-1248190(-) | protein_length=	hypothetical protein	Tb927.7.4690	3	3	3	14.1	14.1	14.1	34.797	0	3.103	32764000	4	3	3	3	3	2	3	2	3	3	3	3	3	2	3	2	3	3	3	3	3	2	3	2	3	319	NaN	14.1	14.1	14.1
	1.38167	0.0415268	-0.105513	0.929475	Tb927.11.13670:mRNA-p1	Tb927.11.13670:mRNA-p1	Tb927.11.13670:mRNA-p1 | transcript=Tb927.11.13670:mRNA | gene=Tb927.11.13670 | organism=Trypanosoma_brucei_brucei_TREU927 | gene_product=hypothetical protein, conserved | transcript_product=hypothetical protein, conserved | location=Tb927_11_v5.1:3640224-	hypothetical protein	Tb927.11.13670	18	18	18	16.7	16.7	16.7	183.5	0	69.517	614800000	70	15	16	15	15	14	15	15	16	15	16	15	15	14	15	15	16	15	16	15	15	14	15	15	16	1624	1624	13.9	15.7	14
	1.37883	0.0417994	-0.231337	0.851845	Tb927.10.11150:mRNA-p1	Tb927.10.11150:mRNA-p1	Tb927.10.11150:mRNA-p1 | transcript=Tb927.10.11150:mRNA | gene=Tb927.10.11150 | organism=Trypanosoma_brucei_brucei_TREU927 | gene_product=hypothetical protein, conserved | transcript_product=hypothetical protein, conserved | location=Tb927_10_v5.1:2728700-	hypothetical protein	Tb927.10.11150	3	3	3	19.9	19.9	19.9	25.436	0	22.904	106530000	20	3	3	3	2	3	3	3	3	3	3	3	2	3	3	3	3	3	3	3	2	3	3	3	3	226	226	19.9	19.9	19.9
	1.3786	0.041822	0.355038	1.27902	Tb927.8.1160:mRNA-p1	Tb927.8.1160:mRNA-p1	Tb927.8.1160:mRNA-p1 | transcript=Tb927.8.1160:mRNA | gene=Tb927.8.1160 | organism=Trypanosoma_brucei_brucei_TREU927 | gene_product=vacuolar-type Ca2+-ATPase, putative | transcript_product=vacuolar-type Ca2+-ATPase, putative | location=Tb927_08_v5.1:369465	vacuolar-type Ca2+-ATPase	Tb927.8.1160	27	2	2	36.2	1.9	1.9	121.24	0	3.8618	20683000	11	22	26	24	26	24	24	23	24	2	2	2	2	2	2	2	1	2	2	2	2	2	2	2	1	1102	1102	31	34.7	33.4
	1.37703	0.0419727	0.142314	1.10367	Tb927.11.4880:mRNA-p1	Tb927.11.4880:mRNA-p1	Tb927.11.4880:mRNA-p1 | transcript=Tb927.11.4880:mRNA | gene=Tb927.11.4880 | organism=Trypanosoma_brucei_brucei_TREU927 | gene_product=Calmodulin-binding, putative | transcript_product=Calmodulin-binding, putative | location=Tb927_11_v5.1:1397126-1397950(+	Calmodulin-binding	Tb927.11.4880	10	10	10	43.4	43.4	43.4	30.214	0	37.831	718450000	67	10	9	10	10	9	9	9	9	10	9	10	10	9	9	9	9	10	9	10	10	9	9	9	9	274	274	43.4	40.9	43.4
	1.36654	0.0429993	-0.359847	0.779247	Tb927.7.1610:mRNA-p1	Tb927.7.1610:mRNA-p1	Tb927.7.1610:mRNA-p1 | transcript=Tb927.7.1610:mRNA | gene=Tb927.7.1610 | organism=Trypanosoma_brucei_brucei_TREU927 | gene_product=6-phosphofructo-2-kinase/fructose-2,6-biphosphatase, putative | transcript_product=6-phosphofructo-2-kinase/fructose-2,6-bip	6-phosphofructo-2-kinase/fructose-2	Tb927.7.1610	1	1	1	2	2	2	72.906	0	2.9266	10877000	4	1	1	1	1	1	1	1	1	1	1	1	1	1	1	1	1	1	1	1	1	1	1	1	1	653	653	2	2	2
	1.36619	0.0430342	-0.175563	0.885422	Tb927.10.3790:mRNA-p1;Tb11.v5.0583.1-p1;Tb11.v5.0603.1-p1	Tb927.10.3790:mRNA-p1	Tb927.10.3790:mRNA-p1 | transcript=Tb927.10.3790:mRNA | gene=Tb927.10.3790 | organism=Trypanosoma_brucei_brucei_TREU927 | gene_product=hypothetical protein, conserved | transcript_product=hypothetical protein, conserved | location=Tb927_10_v5.1:986130-9978	hypothetical protein	Tb927.10.3790	12	12	12	4.9	4.9	4.9	432.89	0	18.352	150120000	21	9	9	9	10	9	8	9	9	9	9	9	10	9	8	9	9	9	9	9	10	9	8	9	9	3901	NaN	3.8	3.6	3.5
	1.36482	0.0431701	-0.0852008	0.942653	Tb927.3.4140:mRNA-p1	Tb927.3.4140:mRNA-p1	Tb927.3.4140:mRNA-p1 | transcript=Tb927.3.4140:mRNA | gene=Tb927.3.4140 | organism=Trypanosoma_brucei_brucei_TREU927 | gene_product=hypothetical protein, conserved | transcript_product=hypothetical protein, conserved | location=Tb927_03_v5.1:1164410-116609	hypothetical protein	Tb927.3.4140	7	7	7	17.8	17.8	17.8	61.891	0	34.803	173500000	31	5	7	6	6	5	5	6	6	5	7	6	6	5	5	6	6	5	7	6	6	5	5	6	6	561	561	14.1	17.8	15.9
	1.35952	0.0436995	-0.217627	0.859979	Tb927.2.5810:mRNA-p1	Tb927.2.5810:mRNA-p1	Tb927.2.5810:mRNA-p1 | transcript=Tb927.2.5810:mRNA | gene=Tb927.2.5810 | organism=Trypanosoma_brucei_brucei_TREU927 | gene_product=Holliday-junction resolvase-like of SPT6/SH2 domain containing protein, putative | transcript_product=Holliday-junction reso	Holliday-junction resolvase-like of SPT6/SH2 domain containing protein	Tb927.2.5810	17	17	17	16.5	16.5	16.5	174.02	0	37.309	281860000	28	15	14	12	14	15	15	12	16	15	14	12	14	15	15	12	16	15	14	12	14	15	15	12	16	1543	1543	13.3	13.7	9.9
	1.35757	0.0438961	0.0922837	1.06606	Tb927.8.2780:mRNA-p1	Tb927.8.2780:mRNA-p1	Tb927.8.2780:mRNA-p1 | transcript=Tb927.8.2780:mRNA | gene=Tb927.8.2780 | organism=Trypanosoma_brucei_brucei_TREU927 | gene_product=RNA-binding protein RBP10, putative | transcript_product=RNA-binding protein RBP10, putative | location=Tb927_08_v5.1:828598	RNA-binding protein RBP10	Tb927.8.2780	6	6	6	34	34	34	32.195	0	40.561	699730000	56	6	6	6	6	6	6	6	6	6	6	6	6	6	6	6	6	6	6	6	6	6	6	6	6	306	306	34	34	34
	1.35691	0.0439631	-0.497602	0.708283	Tb927.4.810:mRNA-p1	Tb927.4.810:mRNA-p1	Tb927.4.810:mRNA-p1 | transcript=Tb927.4.810:mRNA | gene=Tb927.4.810 | organism=Trypanosoma_brucei_brucei_TREU927 | gene_product=expression site-associated gene 5 (ESAG5) protein, putative | transcript_product=expression site-associated gene 5 (ESAG5) prot	expression site-associated gene 5 (ESAG5) protein	Tb927.4.810	2	2	2	8.1	8.1	8.1	52.042	0	24.506	126380000	9	2	2	2	2	2	2	2	2	2	2	2	2	2	2	2	2	2	2	2	2	2	2	2	2	483	483	8.1	8.1	8.1
	1.35651	0.0440033	-0.127584	0.915363	Tb927.8.5090:mRNA-p1;Tb11.v5.0723.1-p1	Tb927.8.5090:mRNA-p1	Tb927.8.5090:mRNA-p1 | transcript=Tb927.8.5090:mRNA | gene=Tb927.8.5090 | organism=Trypanosoma_brucei_brucei_TREU927 | gene_product=DNA-directed RNA polymerase I largest subunit | transcript_product=DNA-directed RNA polymerase I largest subunit | location=	DNA-directed RNA polymerase I largest subunit	Tb927.8.5090	32	32	32	23.4	23.4	23.4	195.95	0	72.721	516830000	92	25	28	28	25	28	29	22	27	25	28	28	25	28	29	22	27	25	28	28	25	28	29	22	27	1781	NaN	18.5	19.7	19.3
	1.3544	0.0442185	-0.113251	0.924502	Tb927.3.5420:mRNA-p1	Tb927.3.5420:mRNA-p1	Tb927.3.5420:mRNA-p1 | transcript=Tb927.3.5420:mRNA | gene=Tb927.3.5420 | organism=Trypanosoma_brucei_brucei_TREU927 | gene_product=protein transport protein Sec24 | transcript_product=protein transport protein Sec24 | location=Tb927_03_v5.1:1515728-151843	protein transport protein Sec24	Tb927.3.5420	16	16	16	25.8	25.8	25.8	100.87	0	76.45	630220000	105	14	15	14	15	15	16	15	14	14	15	14	15	15	16	15	14	14	15	14	15	15	16	15	14	903	903	23.1	24.4	22.8
	1.35202	0.0444608	-0.124054	0.917606	Tb927.11.5910:mRNA-p1	Tb927.11.5910:mRNA-p1	Tb927.11.5910:mRNA-p1 | transcript=Tb927.11.5910:mRNA | gene=Tb927.11.5910 | organism=Trypanosoma_brucei_brucei_TREU927 | gene_product=WASH complex subunit 7, N-terminal/WASH complex subunit 7/WASH complex subunit 7, C-terminal, putative | transcript_produ	WASH complex subunit 7	Tb927.11.5910	12	12	12	12.7	12.7	12.7	143.97	0	37.618	223080000	46	10	10	10	11	8	8	10	8	10	10	10	11	8	8	10	8	10	10	10	11	8	8	10	8	1257	1257	10.4	10.7	10.7
	1.35049	0.0446178	-0.143858	0.905096	Tb927.5.2140:mRNA-p1	Tb927.5.2140:mRNA-p1	Tb927.5.2140:mRNA-p1 | transcript=Tb927.5.2140:mRNA | gene=Tb927.5.2140 | organism=Trypanosoma_brucei_brucei_TREU927 | gene_product=regulator of nonsense transcripts 1 | transcript_product=regulator of nonsense transcripts 1 | location=Tb927_05_v5.1:732077	regulator of nonsense transcripts 1	Tb927.5.2140	21	21	21	34.2	34.2	34.2	93.324	0	58.442	429260000	94	20	18	19	15	18	18	19	16	20	18	19	15	18	18	19	16	20	18	19	15	18	18	19	16	842	842	33	29.7	30.9
	1.3478	0.0448948	-0.124582	0.91727	Tb927.2.5060:mRNA-p1	Tb927.2.5060:mRNA-p1	Tb927.2.5060:mRNA-p1 | transcript=Tb927.2.5060:mRNA | gene=Tb927.2.5060 | organism=Trypanosoma_brucei_brucei_TREU927 | gene_product=GTP binding protein, putative | transcript_product=GTP binding protein, putative | location=Tb927_02_v5.1:895261-896445(-) |	GTP binding protein	Tb927.2.5060	25	25	25	75.1	75.1	75.1	44.349	0	204.1	5377300000	201	21	23	23	24	23	23	21	24	21	23	23	24	23	23	21	24	21	23	23	24	23	23	21	24	394	394	70.1	71.6	73.4
	1.33952	0.0457591	-0.173447	0.886722	Tb927.9.9220:mRNA-p1	Tb927.9.9220:mRNA-p1	Tb927.9.9220:mRNA-p1 | transcript=Tb927.9.9220:mRNA | gene=Tb927.9.9220 | organism=Trypanosoma_brucei_brucei_TREU927 | gene_product=ribonuclease P | transcript_product=ribonuclease P | location=Tb927_09_v5.1:1469857-1471557(-) | protein_length=566 | sequen	ribonuclease P	Tb927.9.9220	4	4	4	9.9	9.9	9.9	64.445	0.00049164	2.2484	50470000	5	3	4	4	4	4	3	3	4	3	4	4	4	4	3	3	4	3	4	4	4	4	3	3	4	566	566	7.6	9.9	9.9
	1.33889	0.0458254	0.0914235	1.06542	Tb927.6.1730:mRNA-p1;Tb11.v5.0892.1-p1	Tb927.6.1730:mRNA-p1;Tb11.v5.0892.1-p1	Tb927.6.1730:mRNA-p1 | transcript=Tb927.6.1730:mRNA | gene=Tb927.6.1730 | organism=Trypanosoma_brucei_brucei_TREU927 | gene_product=hypothetical protein, conserved | transcript_product=hypothetical protein, conserved | location=Tb927_06_v5.1:577316-581146(	hypothetical protein	Tb927.6.1730	21	21	21	20.1	20.1	20.1	139.22	0	59.298	522050000	118	19	18	18	20	18	16	18	17	19	18	18	20	18	16	18	17	19	18	18	20	18	16	18	17	1276	NaN	18.4	17.2	17.2
	1.33438	0.0463046	-0.178156	0.883832	Tb927.10.2040:mRNA-p1	Tb927.10.2040:mRNA-p1	Tb927.10.2040:mRNA-p1 | transcript=Tb927.10.2040:mRNA | gene=Tb927.10.2040 | organism=Trypanosoma_brucei_brucei_TREU927 | gene_product=STE group serine/threonine-protein kinase, putative | transcript_product=STE group serine/threonine-protein kinase, putat	STE group serine/threonine-protein kinase	Tb927.10.2040	11	11	11	21.4	21.4	21.4	93.874	0	35.718	163160000	42	9	10	9	9	11	9	10	11	9	10	9	9	11	9	10	11	9	10	9	9	11	9	10	11	873	873	18.8	20.2	17.5
	1.33332	0.0464169	0.137771	1.1002	Tb927.4.470:mRNA-p1	Tb927.4.470:mRNA-p1	Tb927.4.470:mRNA-p1 | transcript=Tb927.4.470:mRNA | gene=Tb927.4.470 | organism=Trypanosoma_brucei_brucei_TREU927 | gene_product=snoRNP protein GAR1, putative | transcript_product=snoRNP protein GAR1, putative | location=Tb927_04_v5.1:137456-138145(-) | pr	snoRNP protein GAR1	Tb927.4.470	4	4	4	31.9	31.9	31.9	21.783	0	44.885	1606600000	35	4	4	4	4	4	4	4	4	4	4	4	4	4	4	4	4	4	4	4	4	4	4	4	4	229	229	31.9	31.9	31.9
	1.33308	0.0464425	0.0998621	1.07167	Tb927.11.14280:mRNA-p1	Tb927.11.14280:mRNA-p1	Tb927.11.14280:mRNA-p1 | transcript=Tb927.11.14280:mRNA | gene=Tb927.11.14280 | organism=Trypanosoma_brucei_brucei_TREU927 | gene_product=septum formation protein MAF homologue, putative | transcript_product=septum formation protein MAF homologue, putative	septum formation protein MAF homologue	Tb927.11.14280	8	8	8	49.8	49.8	49.8	22.311	0	34.926	299810000	49	8	6	6	8	7	8	8	7	8	6	6	8	7	8	8	7	8	6	6	8	7	8	8	7	203	203	49.8	35.5	35.5
	1.32722	0.0470744	0.123958	1.08972	Tb927.7.240:mRNA-p1;Tb927.7.230:mRNA-p1	Tb927.7.240:mRNA-p1;Tb927.7.230:mRNA-p1	Tb927.7.240:mRNA-p1 | transcript=Tb927.7.240:mRNA | gene=Tb927.7.240 | organism=Trypanosoma_brucei_brucei_TREU927 | gene_product=40S ribosomal protein S33, putative | transcript_product=40S ribosomal protein S33, putative | location=Tb927_07_v5.1:43919-442	40S ribosomal protein S33	Tb927.7.240	5	5	5	51.5	51.5	51.5	11.17	0	15.26	4045000000	93	5	5	5	5	5	5	5	5	5	5	5	5	5	5	5	5	5	5	5	5	5	5	5	5	103	NaN	51.5	51.5	51.5
	1.31279	0.0486645	0.0547142	1.03865	Tb927.11.9400:mRNA-p1	Tb927.11.9400:mRNA-p1	Tb927.11.9400:mRNA-p1 | transcript=Tb927.11.9400:mRNA | gene=Tb927.11.9400 | organism=Trypanosoma_brucei_brucei_TREU927 | gene_product=hypothetical protein, conserved | transcript_product=hypothetical protein, conserved | location=Tb927_11_v5.1:2576831-257	hypothetical protein	Tb927.11.9400	36	36	36	59.2	59.2	59.2	95.905	0	259.79	3223700000	272	36	34	35	33	30	34	35	35	36	34	35	33	30	34	35	35	36	34	35	33	30	34	35	35	887	887	59.2	58.1	55.5
	1.30784	0.0492216	-0.186728	0.878596	Tb927.11.6430:mRNA-p1	Tb927.11.6430:mRNA-p1	Tb927.11.6430:mRNA-p1 | transcript=Tb927.11.6430:mRNA | gene=Tb927.11.6430 | organism=Trypanosoma_brucei_brucei_TREU927 | gene_product=hypothetical protein, conserved | transcript_product=hypothetical protein, conserved | location=Tb927_11_v5.1:1813353-181	hypothetical protein	Tb927.11.6430	24	24	24	27.8	27.8	27.8	134.73	0	91.06	531500000	101	20	23	20	21	19	18	17	20	20	23	20	21	19	18	17	20	20	23	20	21	19	18	17	20	1259	1259	23	26.1	23.1
	1.30764	0.0492447	-0.155382	0.897894	Tb927.10.920:mRNA-p1	Tb927.10.920:mRNA-p1	Tb927.10.920:mRNA-p1 | transcript=Tb927.10.920:mRNA | gene=Tb927.10.920 | organism=Trypanosoma_brucei_brucei_TREU927 | gene_product=Ribosomal protein L1p/L10e family, putative | transcript_product=Ribosomal protein L1p/L10e family, putative | location=Tb92	Ribosomal protein L1p/L10e family	Tb927.10.920	6	6	6	24.6	24.6	24.6	32.531	0	8.1343	97645000	29	6	5	4	5	6	6	6	5	6	5	4	5	6	6	6	5	6	5	4	5	6	6	6	5	297	297	24.6	19.5	15.8
	1.30636	0.0493903	-0.147372	0.902894	Tb927.8.2690:mRNA-p1	Tb927.8.2690:mRNA-p1	Tb927.8.2690:mRNA-p1 | transcript=Tb927.8.2690:mRNA | gene=Tb927.8.2690 | organism=Trypanosoma_brucei_brucei_TREU927 | gene_product=SET domain containing protein, putative | transcript_product=SET domain containing protein, putative | location=Tb927_08_v5.	SET domain containing protein	Tb927.8.2690	6	6	6	23.6	23.6	23.6	43.74	0	13.463	150100000	21	5	6	6	5	5	4	6	5	5	6	6	5	5	4	6	5	5	6	6	5	5	4	6	5	399	399	21.3	23.6	23.6
	1.30109	0.0499933	-0.0895429	0.93982	Tb927.10.14000:mRNA-p1;REV__Tb927.5.940:mRNA-p1	Tb927.10.14000:mRNA-p1	Tb927.10.14000:mRNA-p1 | transcript=Tb927.10.14000:mRNA | gene=Tb927.10.14000 | organism=Trypanosoma_brucei_brucei_TREU927 | gene_product=aconitase | transcript_product=aconitase | location=Tb927_10_v5.1:3409635-3412328(-) | protein_length=897 | sequence_S	aconitase	Tb927.10.14000	23	23	23	35.2	35.2	35.2	98.314	0	64.644	428930000	70	20	20	21	20	18	19	18	21	20	20	21	20	18	19	18	21	20	20	21	20	18	19	18	21	897	NaN	30.4	30.3	32.2
	1.30102	0.0500016	-0.279078	0.824118	Tb927.3.4030:mRNA-p1	Tb927.3.4030:mRNA-p1	Tb927.3.4030:mRNA-p1 | transcript=Tb927.3.4030:mRNA | gene=Tb927.3.4030 | organism=Trypanosoma_brucei_brucei_TREU927 | gene_product=hypothetical protein, conserved | transcript_product=hypothetical protein, conserved | location=Tb927_03_v5.1:1135385-113902	hypothetical protein	Tb927.3.4030	10	10	10	14.4	14.4	14.4	135.25	0	28.368	168220000	37	10	9	7	10	9	9	8	9	10	9	7	10	9	9	8	9	10	9	7	10	9	9	8	9	1213	1213	14.4	12.5	10.1
	1.29809	0.0503396	-0.287011	0.819598	Tb927.7.5940:mRNA-p1	Tb927.7.5940:mRNA-p1	Tb927.7.5940:mRNA-p1 | transcript=Tb927.7.5940:mRNA | gene=Tb927.7.5940 | organism=Trypanosoma_brucei_brucei_TREU927 | gene_product=Protein Associated with Differentiation | transcript_product=Protein Associated with Differentiation | location=Tb927_07_v5.	Protein Associated with Differentiation	Tb927.7.5940	3	3	1	5	5	1.5	67.151	0	5.4636	34401000	13	2	2	2	3	3	3	1	3	2	2	2	3	3	3	1	3	1	0	1	1	1	1	0	1	605	605	2.8	3.5	2.8
	1.29764	0.0503921	-0.0655174	0.955603	Tb927.11.11330:mRNA-p1;Tb11.v5.1035.1-p1;Tb11.v5.1034.1-p1	Tb927.11.11330:mRNA-p1;Tb11.v5.1035.1-p1	Tb927.11.11330:mRNA-p1 | transcript=Tb927.11.11330:mRNA | gene=Tb927.11.11330 | organism=Trypanosoma_brucei_brucei_TREU927 | gene_product=heat shock protein 70 | transcript_product=heat shock protein 70 | location=Tb927_11_v5.1:3028681-3030666(+) | protein	heat shock protein 70	Tb927.11.11330	34	33	26	64	62.9	50.8	71.408	0	323.31	122790000000	1167	34	34	34	34	34	34	34	34	33	33	33	33	33	33	33	33	26	26	26	26	26	26	26	26	661	NaN	64	64	64
	1.29718	0.0504455	-0.165651	0.891526	Tb927.2.5980:mRNA-p1	Tb927.2.5980:mRNA-p1	Tb927.2.5980:mRNA-p1 | transcript=Tb927.2.5980:mRNA | gene=Tb927.2.5980 | organism=Trypanosoma_brucei_brucei_TREU927 | gene_product=chaperone protein ClpB1, putative | transcript_product=chaperone protein ClpB1, putative | location=Tb927_02_v5.1:1084458-10	chaperone protein ClpB1	Tb927.2.5980	42	42	42	64.8	64.8	64.8	97.037	0	201.22	3391800000	297	41	38	39	39	39	41	38	41	41	38	39	39	39	41	38	41	41	38	39	39	39	41	38	41	870	870	62.6	56.7	59.9
	1.29688	0.0504806	-0.320065	0.801034	Tb927.8.6000:mRNA-p1	Tb927.8.6000:mRNA-p1	Tb927.8.6000:mRNA-p1 | transcript=Tb927.8.6000:mRNA | gene=Tb927.8.6000 | organism=Trypanosoma_brucei_brucei_TREU927 | gene_product=fatty acid desaturase, putative | transcript_product=fatty acid desaturase, putative | location=Tb927_08_v5.1:1755945-175724	fatty acid desaturase	Tb927.8.6000	3	3	3	12.8	12.8	12.8	49.385	0	10.998	126940000	17	2	3	3	3	3	3	2	3	2	3	3	3	3	3	2	3	2	3	3	3	3	3	2	3	431	431	10.2	12.8	12.8
	1.29652	0.050522	-0.375675	0.770745	Tb927.3.4700.2-p1;Tb927.3.4700.1-p1	Tb927.3.4700.2-p1;Tb927.3.4700.1-p1	Tb927.3.4700.2-p1 | transcript=Tb927.3.4700.2 | gene=Tb927.3.4700 | organism=Trypanosoma_brucei_brucei_TREU927 | gene_product=Domain of unknown function (DUF4379), putative | transcript_product=Domain of unknown function (DUF4379), putative | location=Tb92	Domain of unknown function (DUF4379)	Tb927.3.4700	2	2	2	11.7	11.7	11.7	42.179	0	8.7609	37050000	4	1	2	1	2	2	1	2	1	1	2	1	2	2	1	2	1	1	2	1	2	2	1	2	1	383	NaN	4.4	11.7	4.4
	1.29304	0.0509278	-0.12793	0.915144	Tb927.8.4270:mRNA-p1	Tb927.8.4270:mRNA-p1	Tb927.8.4270:mRNA-p1 | transcript=Tb927.8.4270:mRNA | gene=Tb927.8.4270 | organism=Trypanosoma_brucei_brucei_TREU927 | gene_product=hypothetical protein, conserved | transcript_product=hypothetical protein, conserved | location=Tb927_08_v5.1:1269510-127136	hypothetical protein	Tb927.8.4270	9	9	9	23	23	23	69.165	0	19.052	139580000	39	9	8	6	8	6	7	8	8	9	8	6	8	6	7	8	8	9	8	6	8	6	7	8	8	617	617	23	18.5	13.8
	1.29091	0.0511789	-0.198682	0.871346	Tb927.1.1790:mRNA-p1	Tb927.1.1790:mRNA-p1	Tb927.1.1790:mRNA-p1 | transcript=Tb927.1.1790:mRNA | gene=Tb927.1.1790 | organism=Trypanosoma_brucei_brucei_TREU927 | gene_product=hypothetical PIN domain-containing protein, conserved | transcript_product=hypothetical PIN domain-containing protein, conse	hypothetical PIN domain-containing protein	Tb927.1.1790	4	4	4	25.6	25.6	25.6	25.682	0	11.798	82627000	19	3	4	4	3	4	4	3	4	3	4	4	3	4	4	3	4	3	4	4	3	4	4	3	4	227	227	21.6	25.6	25.6
	1.28909	0.0513939	0.278545	1.21297	Tb927.8.3010:mRNA-p1	Tb927.8.3010:mRNA-p1	Tb927.8.3010:mRNA-p1 | transcript=Tb927.8.3010:mRNA | gene=Tb927.8.3010 | organism=Trypanosoma_brucei_brucei_TREU927 | gene_product=hook complex protein, conserved | transcript_product=hook complex protein, conserved | location=Tb927_08_v5.1:903463-905676(	hook complex protein	Tb927.8.3010	9	9	9	14.1	14.1	14.1	82.184	0	13.425	115890000	29	9	9	8	8	8	8	9	7	9	9	8	8	8	8	9	7	9	9	8	8	8	8	9	7	737	737	14.1	14.1	12.6
	1.28905	0.051399	0.204953	1.15265	Tb927.2.5230:mRNA-p1	Tb927.2.5230:mRNA-p1	Tb927.2.5230:mRNA-p1 | transcript=Tb927.2.5230:mRNA | gene=Tb927.2.5230 | organism=Trypanosoma_brucei_brucei_TREU927 | gene_product=CAMK family pseudokinase, putative | transcript_product=CAMK family pseudokinase, putative | location=Tb927_02_v5.1:919979-9	CAMK family pseudokinase	Tb927.2.5230	3	3	3	10.4	10.4	10.4	30.737	0.00025082	2.5678	23886000	6	2	2	2	2	2	3	3	2	2	2	2	2	2	3	3	2	2	2	2	2	2	3	3	2	279	279	6.1	6.8	6.8
	1.28682	0.0516636	-0.178385	0.883692	Tb927.9.7820:mRNA-p1	Tb927.9.7820:mRNA-p1	Tb927.9.7820:mRNA-p1 | transcript=Tb927.9.7820:mRNA | gene=Tb927.9.7820 | organism=Trypanosoma_brucei_brucei_TREU927 | gene_product=hypothetical protein, conserved | transcript_product=hypothetical protein, conserved | location=Tb927_09_v5.1:1279297-128161	hypothetical protein	Tb927.9.7820	5	5	5	18.3	18.3	18.3	82.728	0	31.189	130260000	17	5	4	4	5	5	4	4	4	5	4	4	5	5	4	4	4	5	4	4	5	5	4	4	4	771	771	18.3	15.2	15.2
	1.2861	0.0517488	-0.132484	0.912259	Tb927.11.11430:mRNA-p1	Tb927.11.11430:mRNA-p1	Tb927.11.11430:mRNA-p1 | transcript=Tb927.11.11430:mRNA | gene=Tb927.11.11430 | organism=Trypanosoma_brucei_brucei_TREU927 | gene_product=cullin 1, putative | transcript_product=cullin 1, putative | location=Tb927_11_v5.1:3060388-3062805(+) | protein_lengt	cullin 1	Tb927.11.11430	15	15	15	23.4	23.4	23.4	91.936	0	36.15	423020000	61	12	15	13	13	12	14	12	13	12	15	13	13	12	14	12	13	12	15	13	13	12	14	12	13	805	805	18.1	23.4	20.7
	1.2846	0.0519283	-0.350697	0.784205	Tb927.10.8390:mRNA-p1	Tb927.10.8390:mRNA-p1	Tb927.10.8390:mRNA-p1 | transcript=Tb927.10.8390:mRNA | gene=Tb927.10.8390 | organism=Trypanosoma_brucei_brucei_TREU927 | gene_product=Concanavalin A-like lectin/glucanases superfamily/SPRY domain/HECT-domain (ubiquitin-transferase), putative | transcript_	Concanavalin A-like lectin/glucanases superfamily/SPRY domain/HECT-domain (ubiqu	Tb927.10.8390	2	2	2	0.9	0.9	0.9	415.93	0.0046522	1.4037	9192800	1	1	1	2	1	2	2	2	1	1	1	2	1	2	2	2	1	1	1	2	1	2	2	2	1	3721	3721	0.4	0.4	0.9
	1.27983	0.0525011	-0.111658	0.925524	Tb927.5.1280:mRNA-p1	Tb927.5.1280:mRNA-p1	Tb927.5.1280:mRNA-p1 | transcript=Tb927.5.1280:mRNA | gene=Tb927.5.1280 | organism=Trypanosoma_brucei_brucei_TREU927 | gene_product=alanine racemase, putative | transcript_product=alanine racemase, putative | location=Tb927_05_v5.1:478015-478788(+) | prote	alanine racemase	Tb927.5.1280	10	10	10	61.1	61.1	61.1	27.575	0	30.528	548100000	55	9	10	9	9	10	9	9	10	9	10	9	9	10	9	9	10	9	10	9	9	10	9	9	10	257	257	51.8	61.1	57.6
	1.27868	0.0526406	-0.945354	0.519302	Tb927.6.280:mRNA-p1;Tb927.6.300:mRNA-p1	Tb927.6.280:mRNA-p1;Tb927.6.300:mRNA-p1	Tb927.6.280:mRNA-p1 | transcript=Tb927.6.280:mRNA | gene=Tb927.6.280 | organism=Trypanosoma_brucei_brucei_TREU927 | gene_product=receptor-type adenylate cyclase GRESAG 4, putative | transcript_product=receptor-type adenylate cyclase GRESAG 4, putative | lo	receptor-type adenylate cyclase GRESAG 4	Tb927.6.280	3	1	1	2.8	1.1	1.1	140.63	0	3.1018	9795000	1	1	3	2	3	2	3	3	3	0	1	0	1	0	1	1	1	0	1	0	1	0	1	1	1	1268	NaN	0.8	2.8	1.7
	1.27793	0.0527313	0.0893955	1.06392	Tb927.1.3450:mRNA-p1;Tb11.v5.0619.1-p1	Tb927.1.3450:mRNA-p1;Tb11.v5.0619.1-p1	Tb927.1.3450:mRNA-p1 | transcript=Tb927.1.3450:mRNA | gene=Tb927.1.3450 | organism=Trypanosoma_brucei_brucei_TREU927 | gene_product=hypothetical protein, conserved | transcript_product=hypothetical protein, conserved | location=Tb927_01_v5.1:737757-740132(	hypothetical protein	Tb927.1.3450	12	12	12	21.9	21.9	21.9	84.883	0	28.299	195820000	41	9	10	11	9	9	10	9	10	9	10	11	9	9	10	9	10	9	10	11	9	9	10	9	10	791	NaN	16.9	19.2	20.7
	1.27669	0.0528822	-0.298365	0.813174	Tb927.7.3350.1:mRNA-p1;Tb927.7.3350.2:mRNA-p1	Tb927.7.3350.1:mRNA-p1;Tb927.7.3350.2:mRNA-p1	Tb927.7.3350.1:mRNA-p1 | transcript=Tb927.7.3350.1:mRNA | gene=Tb927.7.3350 | organism=Trypanosoma_brucei_brucei_TREU927 | gene_product=palmitoyl acyltransferase 11, putative | transcript_product=palmitoyl acyltransferase 11, putative | location=Tb927_07_v	palmitoyl acyltransferase 11	Tb927.7.3350	2	2	2	10.1	10.1	10.1	39.42	0.003066	1.6118	17514000	4	2	2	1	2	2	2	2	2	2	2	1	2	2	2	2	2	2	2	1	2	2	2	2	2	357	NaN	10.1	10.1	2
	1.27464	0.0531327	0.0808592	1.05765	Tb927.3.3130:mRNA-p1	Tb927.3.3130:mRNA-p1	Tb927.3.3130:mRNA-p1 | transcript=Tb927.3.3130:mRNA | gene=Tb927.3.3130 | organism=Trypanosoma_brucei_brucei_TREU927 | gene_product=Present in the outer mitochondrial membrane proteome 24 | transcript_product=Present in the outer mitochondrial membrane pro	Present in the outer mitochondrial membrane proteome 24	Tb927.3.3130	45	45	45	37	37	37	178.08	0	151.52	2341900000	258	41	42	41	44	42	43	44	41	41	42	41	44	42	43	44	41	41	42	41	44	42	43	44	41	1642	1642	32.9	34.9	34
	1.27355	0.0532659	-0.147171	0.90302	Tb927.11.13640:mRNA-p1	Tb927.11.13640:mRNA-p1	Tb927.11.13640:mRNA-p1 | transcript=Tb927.11.13640:mRNA | gene=Tb927.11.13640 | organism=Trypanosoma_brucei_brucei_TREU927 | gene_product=J-binding protein | transcript_product=J-binding protein | location=Tb927_11_v5.1:3635538-3638057(-) | protein_length=	J-binding protein	Tb927.11.13640	10	10	10	18.1	18.1	18.1	95.25	0	34.305	117840000	32	8	8	8	8	7	9	8	9	8	8	8	8	7	9	8	9	8	8	8	8	7	9	8	9	839	839	16	15.6	13.3
	1.27085	0.0535977	0.127222	1.09219	Tb927.9.12800:mRNA-p1	Tb927.9.12800:mRNA-p1	Tb927.9.12800:mRNA-p1 | transcript=Tb927.9.12800:mRNA | gene=Tb927.9.12800 | organism=Trypanosoma_brucei_brucei_TREU927 | gene_product=hypothetical protein, conserved | transcript_product=hypothetical protein, conserved | location=Tb927_09_v5.1:2021042-202	hypothetical protein	Tb927.9.12800	6	6	6	6.7	6.7	6.7	120.05	0	8.5341	66310000	15	5	6	4	5	6	5	5	4	5	6	4	5	6	5	5	4	5	6	4	5	6	5	5	4	1059	1059	5.4	6.7	3.7
	1.27052	0.0536392	-0.118094	0.921404	Tb927.10.13360:mRNA-p1	Tb927.10.13360:mRNA-p1	Tb927.10.13360:mRNA-p1 | transcript=Tb927.10.13360:mRNA | gene=Tb927.10.13360 | organism=Trypanosoma_brucei_brucei_TREU927 | gene_product=Elongation factor Tu, mitochondrial | transcript_product=Elongation factor Tu, mitochondrial | location=Tb927_10_v5.1:	Elongation factor Tu	Tb927.10.13360	15	15	15	44.9	44.9	44.9	51.849	0	86.417	1769800000	157	15	14	15	14	15	15	14	15	15	14	15	14	15	15	14	15	15	14	15	14	15	15	14	15	470	470	44.9	42.6	44.9
	1.2683	0.0539135	-0.307231	0.808191	Tb927.10.11180:mRNA-p1	Tb927.10.11180:mRNA-p1	Tb927.10.11180:mRNA-p1 | transcript=Tb927.10.11180:mRNA | gene=Tb927.10.11180 | organism=Trypanosoma_brucei_brucei_TREU927 | gene_product=Ubiquitin-like modifier-activating enzyme ATG7, putative | transcript_product=Ubiquitin-like modifier-activating enzym	Ubiquitin-like modifier-activating enzyme ATG7	Tb927.10.11180	8	8	8	15.9	15.9	15.9	83.425	0	12.932	74546000	21	5	6	4	5	4	6	6	6	5	6	4	5	4	6	6	6	5	6	4	5	4	6	6	6	754	754	11.3	13.3	9
	1.26653	0.0541342	-0.2688	0.830009	Tb927.3.4410:mRNA-p1	Tb927.3.4410:mRNA-p1	Tb927.3.4410:mRNA-p1 | transcript=Tb927.3.4410:mRNA | gene=Tb927.3.4410 | organism=Trypanosoma_brucei_brucei_TREU927 | gene_product=pre-RNA processing PIH1/Nop17, putative | transcript_product=pre-RNA processing PIH1/Nop17, putative | location=Tb927_03_v5.	pre-RNA processing PIH1/Nop17	Tb927.3.4410	2	2	2	14.5	14.5	14.5	24.735	0	5.2164	61802000	6	1	1	1	2	2	1	1	1	1	1	1	2	2	1	1	1	1	1	1	2	2	1	1	1	220	220	7.7	7.7	7.7
	1.26394	0.054458	0.39313	1.31324	Tb927.7.3220:mRNA-p1	Tb927.7.3220:mRNA-p1	Tb927.7.3220:mRNA-p1 | transcript=Tb927.7.3220:mRNA | gene=Tb927.7.3220 | organism=Trypanosoma_brucei_brucei_TREU927 | gene_product=ChaC-like protein, putative | transcript_product=ChaC-like protein, putative | location=Tb927_07_v5.1:830241-830861(+) | pro	ChaC-like protein	Tb927.7.3220	4	4	4	26.7	26.7	26.7	22.912	0	4.3563	8569600000	10	4	4	4	4	4	3	4	4	4	4	4	4	4	3	4	4	4	4	4	4	4	3	4	4	206	206	26.7	26.7	26.7
	1.26252	0.0546366	0.207645	1.1548	Tb927.10.1660:mRNA-p1	Tb927.10.1660:mRNA-p1	Tb927.10.1660:mRNA-p1 | transcript=Tb927.10.1660:mRNA | gene=Tb927.10.1660 | organism=Trypanosoma_brucei_brucei_TREU927 | gene_product=hypothetical protein, conserved | transcript_product=hypothetical protein, conserved | location=Tb927_10_v5.1:447045-4479	hypothetical protein	Tb927.10.1660	3	3	3	9.2	9.2	9.2	33.212	0.0019175	1.8589	35535000	8	3	3	3	3	3	3	2	3	3	3	3	3	3	3	2	3	3	3	3	3	3	3	2	3	295	295	9.2	9.2	9.2
	1.25946	0.0550227	-0.28964	0.818106	Tb927.10.13190:mRNA-p1	Tb927.10.13190:mRNA-p1	Tb927.10.13190:mRNA-p1 | transcript=Tb927.10.13190:mRNA | gene=Tb927.10.13190 | organism=Trypanosoma_brucei_brucei_TREU927 | gene_product=actin-related protein 2/3 complex subunit 1, putative | transcript_product=actin-related protein 2/3 complex subunit 1	actin-related protein 2/3 complex subunit 1	Tb927.10.13190	1	1	1	4.4	4.4	4.4	42.913	0	3.3297	17172000	5	1	1	1	1	1	1	1	1	1	1	1	1	1	1	1	1	1	1	1	1	1	1	1	1	385	385	4.4	4.4	4.4
	1.25755	0.0552644	0.225756	1.16939	Tb927.11.11980:mRNA-p1;Tb927.11.11975:mRNA-p1;Tb927.11.11965:mRNA-p1	Tb927.11.11980:mRNA-p1;Tb927.11.11975:mRNA-p1;Tb927.11.11965:mRNA-p1	Tb927.11.11980:mRNA-p1 | transcript=Tb927.11.11980:mRNA | gene=Tb927.11.11980 | organism=Trypanosoma_brucei_brucei_TREU927 | gene_product=cytoskeleton-associated protein 15 | transcript_product=cytoskeleton-associated protein 15 | location=Tb927_11_v5.1:32	cytoskeleton-associated protein 15	Tb927.11.11980	5	5	5	34.7	34.7	34.7	14.091	0	47.539	10182000000	317	5	5	5	5	5	5	5	5	5	5	5	5	5	5	5	5	5	5	5	5	5	5	5	5	121	NaN	34.7	34.7	34.7
	1.25466	0.0556343	-0.377256	0.7699	Tb927.11.6980:mRNA-p1	Tb927.11.6980:mRNA-p1	Tb927.11.6980:mRNA-p1 | transcript=Tb927.11.6980:mRNA | gene=Tb927.11.6980 | organism=Trypanosoma_brucei_brucei_TREU927 | gene_product=Phosphoenolpyruvate carboxykinase, related | transcript_product=Phosphoenolpyruvate carboxykinase, related | location=Tb9	Phosphoenolpyruvate carboxykinase	Tb927.11.6980	4	4	4	10.5	10.5	10.5	68.158	0	12.233	74116000	14	2	3	3	4	2	2	2	3	2	3	3	4	2	2	2	3	2	3	3	4	2	2	2	3	607	607	6.6	9.2	9.2
	1.25126	0.0560716	-0.182518	0.881164	Tb927.11.16670:mRNA-p1	Tb927.11.16670:mRNA-p1	Tb927.11.16670:mRNA-p1 | transcript=Tb927.11.16670:mRNA | gene=Tb927.11.16670 | organism=Trypanosoma_brucei_brucei_TREU927 | gene_product=hypothetical protein, conserved | transcript_product=hypothetical protein, conserved | location=Tb927_11_v5.1:4433080-	hypothetical protein	Tb927.11.16670	10	10	10	21.1	21.1	21.1	63.505	0	31.684	257900000	48	10	9	8	10	10	9	9	9	10	9	8	10	10	9	9	9	10	9	8	10	10	9	9	9	570	570	21.1	19.3	17.5
	1.25093	0.0561134	-0.279392	0.823938	Tb927.7.6790:mRNA-p1	Tb927.7.6790:mRNA-p1	Tb927.7.6790:mRNA-p1 | transcript=Tb927.7.6790:mRNA | gene=Tb927.7.6790 | organism=Trypanosoma_brucei_brucei_TREU927 | gene_product=hypothetical protein, conserved | transcript_product=hypothetical protein, conserved | location=Tb927_07_v5.1:1876709-187832	hypothetical protein	Tb927.7.6790	4	4	4	9.3	9.3	9.3	58.772	0.00073099	2.0811	23524000	6	3	2	2	3	2	3	3	3	3	2	2	3	2	3	3	3	3	2	2	3	2	3	3	3	537	537	6.9	3.9	3.9
	1.25082	0.0561275	0.073143	1.05201	Tb927.8.810:mRNA-p1	Tb927.8.810:mRNA-p1	Tb927.8.810:mRNA-p1 | transcript=Tb927.8.810:mRNA | gene=Tb927.8.810 | organism=Trypanosoma_brucei_brucei_TREU927 | gene_product=radial spoke protein RSP9, putative | transcript_product=radial spoke protein RSP9, putative | location=Tb927_08_v5.1:231908-23	radial spoke protein RSP9	Tb927.8.810	14	14	14	55	55	55	37.518	0	68.932	1168900000	95	14	14	14	14	14	14	14	14	14	14	14	14	14	14	14	14	14	14	14	14	14	14	14	14	333	333	55	55	55
	1.24902	0.056361	-0.196393	0.87273	Tb927.9.6090:mRNA-p1;Tb927.9.6100:mRNA-p1;Tb11.v5.0854.1-p1	Tb927.9.6090:mRNA-p1;Tb927.9.6100:mRNA-p1;Tb11.v5.0854.1-p1	Tb927.9.6090:mRNA-p1 | transcript=Tb927.9.6090:mRNA | gene=Tb927.9.6090 | organism=Trypanosoma_brucei_brucei_TREU927 | gene_product=PTP1-interacting protein, 39 kDa | transcript_product=PTP1-interacting protein, 39 kDa | location=Tb927_09_v5.1:1010333-1011	PTP1-interacting protein	Tb927.9.6090	8	8	8	31.8	31.8	31.8	39.499	0	8.7131	137680000	13	7	8	7	7	7	8	7	7	7	8	7	7	7	8	7	7	7	8	7	7	7	8	7	7	343	NaN	28.6	31.8	28.6
	1.24859	0.0564168	-0.213271	0.862579	Tb927.9.2400:mRNA-p1	Tb927.9.2400:mRNA-p1	Tb927.9.2400:mRNA-p1 | transcript=Tb927.9.2400:mRNA | gene=Tb927.9.2400 | organism=Trypanosoma_brucei_brucei_TREU927 | gene_product=hypothetical protein, conserved | transcript_product=hypothetical protein, conserved | location=Tb927_09_v5.1:522081-522665(	hypothetical protein	Tb927.9.2400	4	4	4	23.7	23.7	23.7	21.661	0	9.9836	70048000	12	3	4	4	3	3	4	2	4	3	4	4	3	3	4	2	4	3	4	4	3	3	4	2	4	194	194	19.6	23.7	23.7
	1.24512	0.0568692	-0.258231	0.836112	Tb927.11.5700:mRNA-p1	Tb927.11.5700:mRNA-p1	Tb927.11.5700:mRNA-p1 | transcript=Tb927.11.5700:mRNA | gene=Tb927.11.5700 | organism=Trypanosoma_brucei_brucei_TREU927 | gene_product=hypothetical protein, conserved | transcript_product=hypothetical protein, conserved | location=Tb927_11_v5.1:1608840-161	hypothetical protein	Tb927.11.5700	12	12	12	9.5	9.5	9.5	191.27	0	21.143	136560000	36	11	10	9	10	9	10	11	11	11	10	9	10	9	10	11	11	11	10	9	10	9	10	11	11	1720	1720	9	7.6	7
	1.24424	0.0569851	0.228681	1.17176	Tb927.5.370:mRNA-p1;Tb11.v5.0230.1-p1	Tb927.5.370:mRNA-p1;Tb11.v5.0230.1-p1	Tb927.5.370:mRNA-p1 | transcript=Tb927.5.370:mRNA | gene=Tb927.5.370 | organism=Trypanosoma_brucei_brucei_TREU927 | gene_product=75 kDa invariant surface glycoprotein, putative | transcript_product=75 kDa invariant surface glycoprotein, putative | location	75 kDa invariant surface glycoprotein	Tb927.5.370	17	3	3	29.4	4.6	4.6	58.592	0	4.3348	287250000	21	17	16	15	17	17	17	17	17	3	2	3	3	3	3	3	3	3	2	3	3	3	3	3	3	523	NaN	29.4	27.9	25.8
	1.24354	0.0570765	0.303285	1.23395	Tb927.10.10170:mRNA-p1	Tb927.10.10170:mRNA-p1	Tb927.10.10170:mRNA-p1 | transcript=Tb927.10.10170:mRNA | gene=Tb927.10.10170 | organism=Trypanosoma_brucei_brucei_TREU927 | gene_product=pre-mRNA splicing factor 46, putative | transcript_product=pre-mRNA splicing factor 46, putative | location=Tb927_10_v	pre-mRNA splicing factor 46	Tb927.10.10170	4	4	4	13.1	13.1	13.1	48.744	0	4.8641	44690000	6	2	3	4	4	4	4	3	4	2	3	4	4	4	4	3	4	2	3	4	4	4	4	3	4	444	444	4.5	8.3	13.1
	1.24079	0.0574393	0.0522881	1.03691	Tb927.10.12510:mRNA-p1	Tb927.10.12510:mRNA-p1	Tb927.10.12510:mRNA-p1 | transcript=Tb927.10.12510:mRNA | gene=Tb927.10.12510 | organism=Trypanosoma_brucei_brucei_TREU927 | gene_product=P-type H+-ATPase, putative | transcript_product=P-type H+-ATPase, putative | location=Tb927_10_v5.1:3034630-3037392(-)	P-type H+-ATPase	Tb927.10.12510	34	34	8	47.3	47.3	12.3	100.63	0	176.38	4283300000	302	32	32	32	31	32	32	33	33	32	32	32	31	32	32	33	33	8	8	8	8	8	8	8	8	920	920	44.5	44.5	44.5
	1.24049	0.0574785	-0.152656	0.899593	Tb927.11.9480:mRNA-p1	Tb927.11.9480:mRNA-p1	Tb927.11.9480:mRNA-p1 | transcript=Tb927.11.9480:mRNA | gene=Tb927.11.9480 | organism=Trypanosoma_brucei_brucei_TREU927 | gene_product=tubulin binding cofactor c, putative | transcript_product=tubulin binding cofactor c, putative | location=Tb927_11_v5.1:2	tubulin binding cofactor c	Tb927.11.9480	8	8	8	39.3	39.3	39.3	34.033	0	19.779	127760000	12	8	5	5	7	7	8	7	5	8	5	5	7	7	8	7	5	8	5	5	7	7	8	7	5	308	308	39.3	26.6	26.6
	1.23874	0.0577111	-0.13736	0.909182	Tb927.10.5520:mRNA-p1	Tb927.10.5520:mRNA-p1	Tb927.10.5520:mRNA-p1 | transcript=Tb927.10.5520:mRNA | gene=Tb927.10.5520 | organism=Trypanosoma_brucei_brucei_TREU927 | gene_product=AmmeMemoRadiSam system protein B, putative | transcript_product=AmmeMemoRadiSam system protein B, putative | location=Tb9	AmmeMemoRadiSam system protein B	Tb927.10.5520	12	12	12	45.2	45.2	45.2	36.138	0	31.718	684550000	74	10	11	11	11	10	11	11	12	10	11	11	11	10	11	11	12	10	11	11	11	10	11	11	12	323	323	39.6	45.2	45.2
	1.2372	0.0579159	-0.0709143	0.952034	Tb927.11.6050:mRNA-p1	Tb927.11.6050:mRNA-p1	Tb927.11.6050:mRNA-p1 | transcript=Tb927.11.6050:mRNA | gene=Tb927.11.6050 | organism=Trypanosoma_brucei_brucei_TREU927 | gene_product=Flagellar-associated PapD-like, putative | transcript_product=Flagellar-associated PapD-like, putative | location=Tb927_1	Flagellar-associated PapD-like	Tb927.11.6050	14	14	14	10.5	10.5	10.5	189.56	0	31.705	1303300000	63	14	14	14	13	13	13	13	14	14	14	14	13	13	13	13	14	14	14	14	13	13	13	13	14	1707	1707	10.5	10.5	10.5
	1.23212	0.0585976	-0.323447	0.799158	Tb927.4.1360:mRNA-p1	Tb927.4.1360:mRNA-p1	Tb927.4.1360:mRNA-p1 | transcript=Tb927.4.1360:mRNA | gene=Tb927.4.1360 | organism=Trypanosoma_brucei_brucei_TREU927 | gene_product=Glucose-6-phosphate 1-epimerase, putative | transcript_product=Glucose-6-phosphate 1-epimerase, putative | location=Tb927_04	Glucose-6-phosphate 1-epimerase	Tb927.4.1360	4	4	4	21.2	21.2	21.2	32.547	0	7.7294	166310000	12	4	3	4	4	4	4	3	3	4	3	4	4	4	4	3	3	4	3	4	4	4	4	3	3	293	293	21.2	14.3	21.2
	1.23192	0.0586242	0.189503	1.14037	Tb927.11.2550:mRNA-p1	Tb927.11.2550:mRNA-p1	Tb927.11.2550:mRNA-p1 | transcript=Tb927.11.2550:mRNA | gene=Tb927.11.2550 | organism=Trypanosoma_brucei_brucei_TREU927 | gene_product=recombinase rad51, putative | transcript_product=recombinase rad51, putative | location=Tb927_11_v5.1:750008-751531(-) |	recombinase rad51	Tb927.11.2550	1	1	1	3.6	3.6	3.6	54.542	0	3.0852	11785000	1	1	1	1	1	1	1	1	1	1	1	1	1	1	1	1	1	1	1	1	1	1	1	1	1	507	507	3.6	3.6	3.6
	1.22898	0.0590227	0.426947	1.34439	Tb927.4.670:mRNA-p1	Tb927.4.670:mRNA-p1	Tb927.4.670:mRNA-p1 | transcript=Tb927.4.670:mRNA | gene=Tb927.4.670 | organism=Trypanosoma_brucei_brucei_TREU927 | gene_product=conserved protein, unknown function | transcript_product=conserved protein, unknown function | location=Tb927_04_v5.1:191591-19	conserved protein	Tb927.4.670	3	3	3	5.1	5.1	5.1	73.824	0	3.6247	19929000	7	2	3	3	2	2	3	2	3	2	3	3	2	2	3	2	3	2	3	3	2	2	3	2	3	652	652	3.2	5.1	5.1
	1.22311	0.0598265	0.167964	1.12347	Tb927.7.2110:mRNA-p1	Tb927.7.2110:mRNA-p1	Tb927.7.2110:mRNA-p1 | transcript=Tb927.7.2110:mRNA | gene=Tb927.7.2110 | organism=Trypanosoma_brucei_brucei_TREU927 | gene_product=kinetoplastid kinetochore protein 11 | transcript_product=kinetoplastid kinetochore protein 11 | location=Tb927_07_v5.1:5362	kinetoplastid kinetochore protein 11	Tb927.7.2110	4	4	4	20.7	20.7	20.7	29.286	0	9.6631	69353000	13	3	3	4	4	4	2	3	2	3	3	4	4	4	2	3	2	3	3	4	4	4	2	3	2	251	251	15.5	15.5	20.7
	1.2214	0.0600626	-0.186864	0.878513	Tb927.11.4380:mRNA-p1	Tb927.11.4380:mRNA-p1	Tb927.11.4380:mRNA-p1 | transcript=Tb927.11.4380:mRNA | gene=Tb927.11.4380 | organism=Trypanosoma_brucei_brucei_TREU927 | gene_product=ATP-dependent RNA helicase, putative | transcript_product=ATP-dependent RNA helicase, putative | location=Tb927_11_v5.1:1	ATP-dependent RNA helicase	Tb927.11.4380	14	14	14	10	10	10	243.37	0	32.389	189790000	34	10	11	11	9	9	11	11	12	10	11	11	9	9	11	11	12	10	11	11	9	9	11	11	12	2151	2151	7.3	8.3	7.8
	1.22039	0.0602015	-0.179767	0.882846	Tb927.11.12470:mRNA-p1	Tb927.11.12470:mRNA-p1	Tb927.11.12470:mRNA-p1 | transcript=Tb927.11.12470:mRNA | gene=Tb927.11.12470 | organism=Trypanosoma_brucei_brucei_TREU927 | gene_product=hypothetical protein, conserved | transcript_product=hypothetical protein, conserved | location=Tb927_11_v5.1:3339362-	hypothetical protein	Tb927.11.12470	16	16	16	11.3	11.3	11.3	238.27	0	28.624	222860000	47	12	13	13	14	14	15	14	15	12	13	13	14	14	15	14	15	12	13	13	14	14	15	14	15	2195	2195	8.6	9.3	9.2
	1.21988	0.060273	-0.141931	0.906306	Tb927.10.14330:mRNA-p1	Tb927.10.14330:mRNA-p1	Tb927.10.14330:mRNA-p1 | transcript=Tb927.10.14330:mRNA | gene=Tb927.10.14330 | organism=Trypanosoma_brucei_brucei_TREU927 | gene_product=Utp14 protein, putative | transcript_product=Utp14 protein, putative | location=Tb927_10_v5.1:3484116-3487238(-) | pro	Utp14 protein	Tb927.10.14330	10	10	10	14.3	14.3	14.3	115.95	0	31.323	198670000	37	10	8	9	9	7	8	8	8	10	8	9	9	7	8	8	8	10	8	9	9	7	8	8	8	1040	1040	14.3	12.2	13.6
	1.21341	0.0611773	-0.146114	0.903681	Tb927.8.3490:mRNA-p1;Tb927.8.3930:mRNA-p1	Tb927.8.3490:mRNA-p1	Tb927.8.3490:mRNA-p1 | transcript=Tb927.8.3490:mRNA | gene=Tb927.8.3490 | organism=Trypanosoma_brucei_brucei_TREU927 | gene_product=Gryzun, putative trafficking through Golgi, putative | transcript_product=Gryzun, putative trafficking through Golgi, putati	Gryzun	Tb927.8.3490	7	7	7	10.1	10.1	10.1	120.39	0	13.509	77007000	22	5	6	7	6	6	4	4	4	5	6	7	6	6	4	4	4	5	6	7	6	6	4	4	4	1083	NaN	8.1	8.2	10.1
	1.21254	0.0613005	-0.180861	0.882176	Tb927.10.14870:mRNA-p1	Tb927.10.14870:mRNA-p1	Tb927.10.14870:mRNA-p1 | transcript=Tb927.10.14870:mRNA | gene=Tb927.10.14870 | organism=Trypanosoma_brucei_brucei_TREU927 | gene_product=hypothetical protein, conserved | transcript_product=hypothetical protein, conserved | location=Tb927_10_v5.1:3627364-	hypothetical protein	Tb927.10.14870	10	10	10	19.1	19.1	19.1	75.914	0	40.48	308200000	46	10	9	9	10	9	9	10	10	10	9	9	10	9	9	10	10	10	9	9	10	9	9	10	10	681	681	19.1	18.1	15.6
	1.21157	0.0614372	0.105203	1.07565	Tb927.4.2880:mRNA-p1	Tb927.4.2880:mRNA-p1	Tb927.4.2880:mRNA-p1 | transcript=Tb927.4.2880:mRNA | gene=Tb927.4.2880 | organism=Trypanosoma_brucei_brucei_TREU927 | gene_product=Nucleoporin NUP225 | transcript_product=Nucleoporin NUP225 | location=Tb927_04_v5.1:758292-764504(+) | protein_length=2070 |	Nucleoporin NUP225	Tb927.4.2880	19	19	19	14	14	14	225.59	0	66.742	518870000	62	16	18	18	14	16	16	15	18	16	18	18	14	16	16	15	18	16	18	18	14	16	16	15	18	2070	2070	12.5	13.4	13.5
	1.21156	0.0614389	-0.224927	0.855638	Tb927.3.3590:mRNA-p1	Tb927.3.3590:mRNA-p1	Tb927.3.3590:mRNA-p1 | transcript=Tb927.3.3590:mRNA | gene=Tb927.3.3590 | organism=Trypanosoma_brucei_brucei_TREU927 | gene_product=U3 small nucleolar ribonucleoprotein protein MPP10, putative | transcript_product=U3 small nucleolar ribonucleoprotein prote	U3 small nucleolar ribonucleoprotein protein MPP10	Tb927.3.3590	8	8	8	17	17	17	75.271	0	28.891	190850000	32	7	8	7	7	8	7	7	7	7	8	7	7	8	7	7	7	7	8	7	7	8	7	7	7	672	672	15.8	17	13.5
	1.21062	0.061572	-0.0650926	0.955884	Tb927.5.4560:mRNA-p1;Tb11.v5.0409.1-p1;Tb05.5K5.200:mRNA-p1	Tb927.5.4560:mRNA-p1;Tb11.v5.0409.1-p1;Tb05.5K5.200:mRNA-p1	Tb927.5.4560:mRNA-p1 | transcript=Tb927.5.4560:mRNA | gene=Tb927.5.4560 | organism=Trypanosoma_brucei_brucei_TREU927 | gene_product=guanine deaminase, putative | transcript_product=guanine deaminase, putative | location=Tb927_05_v5.1:1410838-1412388(+) | p	guanine deaminase	Tb927.5.4560	22	22	22	61.8	61.8	61.8	55.321	0	159.55	2157800000	187	20	21	22	21	20	20	22	22	20	21	22	21	20	20	22	22	20	21	22	21	20	20	22	22	516	NaN	54.1	58.3	61.8
	1.21037	0.0616068	-1.17826	0.441885	Tb927.7.3280:mRNA-p1	Tb927.7.3280:mRNA-p1	Tb927.7.3280:mRNA-p1 | transcript=Tb927.7.3280:mRNA | gene=Tb927.7.3280 | organism=Trypanosoma_brucei_brucei_TREU927 | gene_product=translation initiation factor IF-2, putative | transcript_product=translation initiation factor IF-2, putative | location=Tb	translation initiation factor IF-2	Tb927.7.3280	4	4	4	8.5	8.5	8.5	86.942	0	6.3787	350490000	3	3	4	3	3	4	4	4	3	3	4	3	3	4	4	4	3	3	4	3	3	4	4	4	3	787	787	7	8.5	7
	1.20997	0.0616642	-0.118917	0.920879	Tb927.10.14680:mRNA-p1	Tb927.10.14680:mRNA-p1	Tb927.10.14680:mRNA-p1 | transcript=Tb927.10.14680:mRNA | gene=Tb927.10.14680 | organism=Trypanosoma_brucei_brucei_TREU927 | gene_product=ribosome biogenesis protein, putative | transcript_product=ribosome biogenesis protein, putative | location=Tb927_10_v	ribosome biogenesis protein	Tb927.10.14680	9	9	9	32.6	32.6	32.6	35.673	0	28.183	319860000	63	8	9	8	7	6	9	6	6	8	9	8	7	6	9	6	6	8	9	8	7	6	9	6	6	307	307	28.3	32.6	28.3
	1.20695	0.0620946	-0.309293	0.807037	Tb927.11.12860.2-p1;Tb927.11.12860.1-p1	Tb927.11.12860.2-p1;Tb927.11.12860.1-p1	Tb927.11.12860.2-p1 | transcript=Tb927.11.12860.2 | gene=Tb927.11.12860 | organism=Trypanosoma_brucei_brucei_TREU927 | gene_product=cAMP response protein, putative | transcript_product=cAMP response protein, putative | location=Tb927_11_v5.1:3450967-345167	cAMP response protein	Tb927.11.12860	3	3	3	12.3	12.3	12.3	27.404	0	4.0214	86766000	11	3	3	3	3	3	3	3	3	3	3	3	3	3	3	3	3	3	3	3	3	3	3	3	3	235	NaN	12.3	12.3	12.3
	1.20414	0.0624973	0.0551696	1.03898	Tb927.4.2080:mRNA-p1	Tb927.4.2080:mRNA-p1	Tb927.4.2080:mRNA-p1 | transcript=Tb927.4.2080:mRNA | gene=Tb927.4.2080 | organism=Trypanosoma_brucei_brucei_TREU927 | gene_product=Coiled-coil and C2 domain-containing protein | transcript_product=Coiled-coil and C2 domain-containing protein | location=Tb	Coiled-coil and C2 domain-containing protein	Tb927.4.2080	54	54	54	61.4	61.4	61.4	104.88	0	226.54	7661700000	438	53	53	52	52	50	53	50	51	53	53	52	52	50	53	50	51	53	53	52	52	50	53	50	51	906	906	61.3	60.6	59.7
	1.20003	0.0630912	-0.160423	0.894763	Tb927.11.12110:mRNA-p1	Tb927.11.12110:mRNA-p1	Tb927.11.12110:mRNA-p1 | transcript=Tb927.11.12110:mRNA | gene=Tb927.11.12110 | organism=Trypanosoma_brucei_brucei_TREU927 | gene_product=RNA helicase, putative | transcript_product=RNA helicase, putative | location=Tb927_11_v5.1:3234510-3238409(+) | prote	RNA helicase	Tb927.11.12110	6	6	6	6.9	6.9	6.9	143.09	0	6.8801	51710000	6	5	4	4	5	4	4	4	4	5	4	4	5	4	4	4	4	5	4	4	5	4	4	4	4	1299	1299	6.2	4.2	4.9
	1.19628	0.0636387	-0.217257	0.8602	Tb927.10.6320:mRNA-p1;Tb11.v5.0274.1-p1	Tb927.10.6320:mRNA-p1;Tb11.v5.0274.1-p1	Tb927.10.6320:mRNA-p1 | transcript=Tb927.10.6320:mRNA | gene=Tb927.10.6320 | organism=Trypanosoma_brucei_brucei_TREU927 | gene_product=CBF/Mak21 family, putative | transcript_product=CBF/Mak21 family, putative | location=Tb927_10_v5.1:1598302-1600143(-) |	CBF/Mak21 family	Tb927.10.6320	8	8	8	17.8	17.8	17.8	68.143	0	20.748	135610000	34	7	7	7	7	7	8	6	7	7	7	7	7	7	8	6	7	7	7	7	7	7	8	6	7	613	NaN	15.7	15.7	15.7
	1.19619	0.0636511	-0.331339	0.794799	Tb927.11.2640:mRNA-p1	Tb927.11.2640:mRNA-p1	Tb927.11.2640:mRNA-p1 | transcript=Tb927.11.2640:mRNA | gene=Tb927.11.2640 | organism=Trypanosoma_brucei_brucei_TREU927 | gene_product=Nucleolar protein 53 | transcript_product=Nucleolar protein 53 | location=Tb927_11_v5.1:774960-776420(-) | protein_length	Nucleolar protein 53	Tb927.11.2640	4	4	4	12.8	12.8	12.8	53.387	0	7.2815	49008000	5	4	3	4	3	4	4	4	3	4	3	4	3	4	4	4	3	4	3	4	3	4	4	4	3	486	486	12.8	9.9	12.8
	1.19592	0.0636917	-0.1442	0.904881	Tb927.5.3230:mRNA-p1	Tb927.5.3230:mRNA-p1	Tb927.5.3230:mRNA-p1 | transcript=Tb927.5.3230:mRNA | gene=Tb927.5.3230 | organism=Trypanosoma_brucei_brucei_TREU927 | gene_product=hypothetical protein, conserved | transcript_product=hypothetical protein, conserved | location=Tb927_05_v5.1:1058296-106484	hypothetical protein	Tb927.5.3230	7	7	7	5.2	5.2	5.2	240.99	0	16.251	163860000	10	7	6	6	7	6	7	6	7	7	6	6	7	6	7	6	7	7	6	6	7	6	7	6	7	2181	2181	5.2	4.6	4.5
	1.19464	0.0638786	-0.221332	0.857773	Tb927.8.7220:mRNA-p1;Tb927.4.5180:mRNA-p1	Tb927.8.7220:mRNA-p1;Tb927.4.5180:mRNA-p1	Tb927.8.7220:mRNA-p1 | transcript=Tb927.8.7220:mRNA | gene=Tb927.8.7220 | organism=Trypanosoma_brucei_brucei_TREU927 | gene_product=tousled-like kinase II | transcript_product=tousled-like kinase II | location=Tb927_08_v5.1:2072492-2074444(+) | protein_len	tousled-like kinase II	Tb927.8.7220	3	3	3	9.1	9.1	9.1	73.421	0	11.698	57892000	19	3	3	2	3	3	2	3	3	3	3	2	3	3	2	3	3	3	3	2	3	3	2	3	3	650	NaN	9.1	9.1	4.9
	1.19262	0.0641766	-0.222297	0.8572	Tb927.2.4550:mRNA-p1	Tb927.2.4550:mRNA-p1	Tb927.2.4550:mRNA-p1 | transcript=Tb927.2.4550:mRNA | gene=Tb927.2.4550 | organism=Trypanosoma_brucei_brucei_TREU927 | gene_product=2-O-ribose RNA methyltransferase SPB1 homolog | transcript_product=2-O-ribose RNA methyltransferase SPB1 homolog | locatio	2-O-ribose RNA methyltransferase SPB1 homolog	Tb927.2.4550	12	12	12	20.1	20.1	20.1	102.88	0	23.715	240100000	32	9	11	9	6	8	9	9	10	9	11	9	6	8	9	9	10	9	11	9	6	8	9	9	10	905	905	15.8	19.2	15.8
	1.19048	0.0644935	0.155723	1.11398	Tb927.2.4230:mRNA-p1;Tb11.v5.0827.1-p1	Tb927.2.4230:mRNA-p1	Tb927.2.4230:mRNA-p1 | transcript=Tb927.2.4230:mRNA | gene=Tb927.2.4230 | organism=Trypanosoma_brucei_brucei_TREU927 | gene_product=NUP-1 protein, putative | transcript_product=NUP-1 protein, putative | location=Tb927_02_v5.1:743768-754711(-) | protein_len	NUP-1 protein	Tb927.2.4230	39	39	39	42.4	42.4	42.4	406.9	0	252.1	2790600000	232	35	34	36	37	33	37	34	33	35	34	36	37	33	37	34	33	35	34	36	37	33	37	34	33	3647	NaN	40.8	40.8	41.1
	1.18964	0.064619	-0.0635643	0.956897	Tb927.11.13520:mRNA-p1	Tb927.11.13520:mRNA-p1	Tb927.11.13520:mRNA-p1 | transcript=Tb927.11.13520:mRNA | gene=Tb927.11.13520 | organism=Trypanosoma_brucei_brucei_TREU927 | gene_product=hypothetical protein, conserved | transcript_product=hypothetical protein, conserved | location=Tb927_11_v5.1:3615256-	hypothetical protein	Tb927.11.13520	29	29	29	43.8	43.8	43.8	105.38	0	123.63	1724300000	181	27	28	28	28	25	27	28	29	27	28	28	28	25	27	28	29	27	28	28	28	25	27	28	29	949	949	41.3	43.1	43
	1.18918	0.0646876	0.122586	1.08868	Tb927.10.1430:mRNA-p1	Tb927.10.1430:mRNA-p1	Tb927.10.1430:mRNA-p1 | transcript=Tb927.10.1430:mRNA | gene=Tb927.10.1430 | organism=Trypanosoma_brucei_brucei_TREU927 | gene_product=hypothetical protein, conserved | transcript_product=hypothetical protein, conserved | location=Tb927_10_v5.1:374347-3750	hypothetical protein	Tb927.10.1430	12	12	12	53.1	53.1	53.1	27.339	0	41.085	1384400000	104	12	12	12	12	12	12	12	12	12	12	12	12	12	12	12	12	12	12	12	12	12	12	12	12	245	245	53.1	53.1	53.1
	1.18429	0.0654205	0.314848	1.24388	Tb927.11.9280:mRNA-p1	Tb927.11.9280:mRNA-p1	Tb927.11.9280:mRNA-p1 | transcript=Tb927.11.9280:mRNA | gene=Tb927.11.9280 | organism=Trypanosoma_brucei_brucei_TREU927 | gene_product=hypothetical protein, conserved | transcript_product=hypothetical protein, conserved | location=Tb927_11_v5.1:2547704-254	hypothetical protein	Tb927.11.9280	1	1	1	4.2	4.2	4.2	74.128	0	3.4429	10316000	4	1	1	1	1	1	1	1	1	1	1	1	1	1	1	1	1	1	1	1	1	1	1	1	1	668	668	4.2	4.2	4.2
	1.18417	0.0654386	0.100554	1.07219	Tb927.11.11680:mRNA-p1	Tb927.11.11680:mRNA-p1	Tb927.11.11680:mRNA-p1 | transcript=Tb927.11.11680:mRNA | gene=Tb927.11.11680 | organism=Trypanosoma_brucei_brucei_TREU927 | gene_product=2-oxoglutarate dehydrogenase E2 component, putative | transcript_product=2-oxoglutarate dehydrogenase E2 component, pu	2-oxoglutarate dehydrogenase E2 component	Tb927.11.11680	13	13	13	37.1	37.1	37.1	41.143	0	57.263	2797400000	107	13	12	13	13	13	13	12	13	13	12	13	13	13	13	12	13	13	12	13	13	13	13	12	13	383	383	37.1	34.2	37.1
	1.18364	0.065518	-0.261465	0.83424	Tb927.10.15740:mRNA-p1	Tb927.10.15740:mRNA-p1	Tb927.10.15740:mRNA-p1 | transcript=Tb927.10.15740:mRNA | gene=Tb927.10.15740 | organism=Trypanosoma_brucei_brucei_TREU927 | gene_product=hypothetical protein, conserved | transcript_product=hypothetical protein, conserved | location=Tb927_10_v5.1:3886795-	hypothetical protein	Tb927.10.15740	7	7	7	24.2	24.2	24.2	55.844	0	21.287	206400000	39	7	7	6	6	6	7	6	7	7	7	6	6	6	7	6	7	7	7	6	6	6	7	6	7	517	517	24.2	24.2	22.6
	1.17926	0.0661814	-0.0772233	0.94788	Tb927.6.3940:mRNA-p1	Tb927.6.3940:mRNA-p1	Tb927.6.3940:mRNA-p1 | transcript=Tb927.6.3940:mRNA | gene=Tb927.6.3940 | organism=Trypanosoma_brucei_brucei_TREU927 | gene_product=Autophagy-related protein 27, putative | transcript_product=Autophagy-related protein 27, putative | location=Tb927_06_v5.1:	Autophagy-related protein 27	Tb927.6.3940	12	12	12	51.4	51.4	51.4	39.208	0	82.524	2915800000	126	12	12	12	12	12	12	12	12	12	12	12	12	12	12	12	12	12	12	12	12	12	12	12	12	364	364	51.4	51.4	51.4
	1.17895	0.0662287	-0.115106	0.923314	Tb927.8.1270:mRNA-p1	Tb927.8.1270:mRNA-p1	Tb927.8.1270:mRNA-p1 | transcript=Tb927.8.1270:mRNA | gene=Tb927.8.1270 | organism=Trypanosoma_brucei_brucei_TREU927 | gene_product=Nucleolar protein 54 | transcript_product=Nucleolar protein 54 | location=Tb927_08_v5.1:401510-402970(-) | protein_length=48	Nucleolar protein 54	Tb927.8.1270	8	8	8	21.6	21.6	21.6	53.545	0	22.763	144740000	38	8	8	8	7	8	7	7	7	8	8	8	7	8	7	7	7	8	8	8	7	8	7	7	7	486	486	21.6	21.6	21.6
	1.17771	0.0664189	-0.25632	0.837221	Tb927.8.1370:mRNA-p1	Tb927.8.1370:mRNA-p1	Tb927.8.1370:mRNA-p1 | transcript=Tb927.8.1370:mRNA | gene=Tb927.8.1370 | organism=Trypanosoma_brucei_brucei_TREU927 | gene_product=hypothetical protein, conserved | transcript_product=hypothetical protein, conserved | location=Tb927_08_v5.1:445051-445512(	hypothetical protein	Tb927.8.1370	1	1	1	11.1	11.1	11.1	18.02	0	6.0949	32195000	6	1	1	1	1	1	1	1	1	1	1	1	1	1	1	1	1	1	1	1	1	1	1	1	1	153	153	11.1	11.1	11.1
	1.17761	0.0664339	0.621183	1.53814	Tb927.7.3260:mRNA-p1;Tb927.7.3250:mRNA-p1	Tb927.7.3260:mRNA-p1;Tb927.7.3250:mRNA-p1	Tb927.7.3260:mRNA-p1 | transcript=Tb927.7.3260:mRNA | gene=Tb927.7.3260 | organism=Trypanosoma_brucei_brucei_TREU927 | gene_product=expression site-associated gene 7 (ESAG7) protein, putative | transcript_product=expression site-associated gene 7 (ESAG7) p	expression site-associated gene 7 (ESAG7) protein	Tb927.7.3260	1	1	1	3.8	3.8	3.8	37.418	0	33.28	167100000	12	1	1	1	1	1	1	1	1	1	1	1	1	1	1	1	1	1	1	1	1	1	1	1	1	339	NaN	3.8	3.8	3.8
	1.17622	0.0666462	-0.416248	0.749371	Tb927.10.13270:mRNA-p1;Tb11.v5.0563.1-p1	Tb927.10.13270:mRNA-p1;Tb11.v5.0563.1-p1	Tb927.10.13270:mRNA-p1 | transcript=Tb927.10.13270:mRNA | gene=Tb927.10.13270 | organism=Trypanosoma_brucei_brucei_TREU927 | gene_product=Periodic tryptophan protein 2 homolog, putative | transcript_product=Periodic tryptophan protein 2 homolog, putative |	Periodic tryptophan protein 2 homolog	Tb927.10.13270	2	2	2	3.5	3.5	3.5	102.91	0.0055491	1.3192	25380000	5	1	2	2	2	1	1	1	2	1	2	2	2	1	1	1	2	1	2	2	2	1	1	1	2	939	NaN	2.4	3.5	3.5
	1.17592	0.0666935	-0.171961	0.887635	Tb927.4.3840:mRNA-p1	Tb927.4.3840:mRNA-p1	Tb927.4.3840:mRNA-p1 | transcript=Tb927.4.3840:mRNA | gene=Tb927.4.3840 | organism=Trypanosoma_brucei_brucei_TREU927 | gene_product=nucleolar protein, putative | transcript_product=nucleolar protein, putative | location=Tb927_04_v5.1:1002060-1003799(-) | p	nucleolar protein	Tb927.4.3840	9	9	9	18.3	18.3	18.3	65.107	0	27.641	280360000	35	9	9	8	9	8	9	8	8	9	9	8	9	8	9	8	8	9	9	8	9	8	9	8	8	579	579	18.3	18.3	17.1
	1.17445	0.0669198	-0.10649	0.928845	Tb927.8.7510:mRNA-p1	Tb927.8.7510:mRNA-p1	Tb927.8.7510:mRNA-p1 | transcript=Tb927.8.7510:mRNA | gene=Tb927.8.7510 | organism=Trypanosoma_brucei_brucei_TREU927 | gene_product=p-nitrophenylphosphatase, putative | transcript_product=p-nitrophenylphosphatase, putative | location=Tb927_08_v5.1:2164109-	p-nitrophenylphosphatase	Tb927.8.7510	9	9	9	30.3	30.3	30.3	41.687	0	29.962	230720000	56	9	8	8	8	9	9	9	9	9	8	8	8	9	9	9	9	9	8	8	8	9	9	9	9	389	389	30.3	26.2	26.2
	1.16687	0.0680972	-0.142437	0.905987	Tb927.7.700:mRNA-p1	Tb927.7.700:mRNA-p1	Tb927.7.700:mRNA-p1 | transcript=Tb927.7.700:mRNA | gene=Tb927.7.700 | organism=Trypanosoma_brucei_brucei_TREU927 | gene_product=Nucleolar protein 74 | transcript_product=Nucleolar protein 74 | location=Tb927_07_v5.1:152958-154958(-) | protein_length=666 |	Nucleolar protein 74	Tb927.7.700	10	10	10	21.9	21.9	21.9	74.25	0	46.275	257910000	45	9	10	9	9	10	9	9	9	9	10	9	9	10	9	9	9	9	10	9	9	10	9	9	9	666	666	20.7	21.9	20.7
	1.16582	0.0682616	-0.109004	0.927228	Tb927.1.3170:mRNA-p1	Tb927.1.3170:mRNA-p1	Tb927.1.3170:mRNA-p1 | transcript=Tb927.1.3170:mRNA | gene=Tb927.1.3170 | organism=Trypanosoma_brucei_brucei_TREU927 | gene_product=CHORD, putative | transcript_product=CHORD, putative | location=Tb927_01_v5.1:687336-688253(+) | protein_length=305 | sequen	CHORD	Tb927.1.3170	10	10	10	40.3	40.3	40.3	34.259	0	47.925	399890000	48	8	9	9	7	8	7	9	10	8	9	9	7	8	7	9	10	8	9	9	7	8	7	9	10	305	305	37.7	40.3	40.3
	1.16496	0.0683972	-0.0969677	0.934996	Tb927.9.10690:mRNA-p1	Tb927.9.10690:mRNA-p1	Tb927.9.10690:mRNA-p1 | transcript=Tb927.9.10690:mRNA | gene=Tb927.9.10690 | organism=Trypanosoma_brucei_brucei_TREU927 | gene_product=Protein of unknown function (DUF2009), putative | transcript_product=Protein of unknown function (DUF2009), putative | lo	Protein of unknown function (DUF2009)	Tb927.9.10690	11	11	11	28.3	28.3	28.3	55.64	0	30.683	473390000	59	10	8	9	8	8	8	9	9	10	8	9	8	8	8	9	9	10	8	9	8	8	8	9	9	488	488	26.2	23	25
	1.16495	0.0683989	-0.112406	0.925044	Tb11.v5.0480.1-p1;Tb927.10.15370:mRNA-p1	Tb11.v5.0480.1-p1;Tb927.10.15370:mRNA-p1	Tb11.v5.0480.1-p1 | transcript=Tb11.v5.0480.1 | gene=Tb11.v5.0480 | organism=Trypanosoma_brucei_brucei_TREU927 | gene_product=DNA-directed RNA polymerase, alpha subunit, putative | transcript_product=DNA-directed RNA polymerase, alpha subunit, putative | l	DNA-directed RNA polymerase	Tb11.v5.0480	15	15	15	48.4	48.4	48.4	37.329	0	36.828	1552300000	76	15	14	14	13	15	13	13	13	15	14	14	13	15	13	13	13	15	14	14	13	15	13	13	13	337	NaN	48.4	45.7	45.7
	1.16241	0.0687995	0.220515	1.16515	Tb927.10.5400:mRNA-p1	Tb927.10.5400:mRNA-p1	Tb927.10.5400:mRNA-p1 | transcript=Tb927.10.5400:mRNA | gene=Tb927.10.5400 | organism=Trypanosoma_brucei_brucei_TREU927 | gene_product=hypothetical protein, conserved | transcript_product=hypothetical protein, conserved | location=Tb927_10_v5.1:1359987-136	hypothetical protein	Tb927.10.5400	11	11	11	32.2	32.2	32.2	63.396	0	63.05	521600000	50	9	10	10	10	9	9	11	9	9	10	10	10	9	9	11	9	9	10	10	10	9	9	11	9	574	574	23.5	28.7	28.7
	1.16227	0.068823	0.274608	1.20967	Tb927.7.7400:mRNA-p1	Tb927.7.7400:mRNA-p1	Tb927.7.7400:mRNA-p1 | transcript=Tb927.7.7400:mRNA | gene=Tb927.7.7400 | organism=Trypanosoma_brucei_brucei_TREU927 | gene_product=Basal body protein | transcript_product=Basal body protein | location=Tb927_07_v5.1:2123779-2130372(-) | protein_length=2197	Basal body protein	Tb927.7.7400	5	4	4	7.9	5	5	247.99	0	2.9433	61422000	11	3	5	3	4	4	3	3	3	2	4	2	3	3	2	2	2	2	4	2	3	3	2	2	2	2197	2197	4.3	7.9	6.7
	1.16212	0.0688455	-0.0897374	0.939694	Tb927.11.2500:mRNA-p1	Tb927.11.2500:mRNA-p1	Tb927.11.2500:mRNA-p1 | transcript=Tb927.11.2500:mRNA | gene=Tb927.11.2500 | organism=Trypanosoma_brucei_brucei_TREU927 | gene_product=Metallocarboxypeptidase 1 | transcript_product=Metallocarboxypeptidase 1 | location=Tb927_11_v5.1:736264-737775(-) | prot	Metallocarboxypeptidase 1	Tb927.11.2500	26	26	26	62.8	62.8	62.8	57.683	0	159.7	3325000000	204	24	26	25	26	25	26	25	25	24	26	25	26	25	26	25	25	24	26	25	26	25	26	25	25	503	503	61	62.8	62.8
	1.16202	0.0688615	0.185461	1.13718	Tb927.7.3540:mRNA-p1	Tb927.7.3540:mRNA-p1	Tb927.7.3540:mRNA-p1 | transcript=Tb927.7.3540:mRNA | gene=Tb927.7.3540 | organism=Trypanosoma_brucei_brucei_TREU927 | gene_product=hypothetical protein, conserved | transcript_product=hypothetical protein, conserved | location=Tb927_07_v5.1:913363-914178(	hypothetical protein	Tb927.7.3540	4	4	4	24.4	24.4	24.4	29.572	0	16.525	190620000	23	4	4	4	4	4	4	4	3	4	4	4	4	4	4	4	3	4	4	4	4	4	4	4	3	271	271	24.4	24.4	24.4
	1.162	0.0688652	-0.166749	0.890848	Tb927.11.13280:mRNA-p1	Tb927.11.13280:mRNA-p1	Tb927.11.13280:mRNA-p1 | transcript=Tb927.11.13280:mRNA | gene=Tb927.11.13280 | organism=Trypanosoma_brucei_brucei_TREU927 | gene_product=Guide RNA binding protein 25 | transcript_product=Guide RNA binding protein 25 | location=Tb927_11_v5.1:3562140-356281	Guide RNA binding protein 25	Tb927.11.13280	8	8	8	45.1	45.1	45.1	25.106	0	61.589	2670700000	85	8	8	8	8	8	8	8	8	8	8	8	8	8	8	8	8	8	8	8	8	8	8	8	8	224	224	45.1	45.1	45.1
	1.15924	0.0693047	-0.209965	0.864558	Tb927.11.3830:mRNA-p1	Tb927.11.3830:mRNA-p1	Tb927.11.3830:mRNA-p1 | transcript=Tb927.11.3830:mRNA | gene=Tb927.11.3830 | organism=Trypanosoma_brucei_brucei_TREU927 | gene_product=hypothetical protein, conserved | transcript_product=hypothetical protein, conserved | location=Tb927_11_v5.1:1121379-112	hypothetical protein	Tb927.11.3830	7	7	7	29.1	29.1	29.1	39.063	0	27.519	141630000	25	7	7	6	7	6	7	6	6	7	7	6	7	6	7	6	6	7	7	6	7	6	7	6	6	354	354	29.1	29.1	23.4
	1.15823	0.0694653	-0.186866	0.878512	Tb927.10.3000:mRNA-p1	Tb927.10.3000:mRNA-p1	Tb927.10.3000:mRNA-p1 | transcript=Tb927.10.3000:mRNA | gene=Tb927.10.3000 | organism=Trypanosoma_brucei_brucei_TREU927 | gene_product=Orofaciodigital syndrome 1-like protein, putative | transcript_product=Orofaciodigital syndrome 1-like protein, putative	Orofaciodigital syndrome 1-like protein	Tb927.10.3000	3	3	3	6.2	6.2	6.2	87.095	0	26.497	49131000	19	2	3	2	3	2	3	3	3	2	3	2	3	2	3	3	3	2	3	2	3	2	3	3	3	785	785	4.8	6.2	4.8
	1.15667	0.0697155	-0.300019	0.812242	Tb927.11.10080:mRNA-p1	Tb927.11.10080:mRNA-p1	Tb927.11.10080:mRNA-p1 | transcript=Tb927.11.10080:mRNA | gene=Tb927.11.10080 | organism=Trypanosoma_brucei_brucei_TREU927 | gene_product=LSU ribosomal protein, mitochondrial, putative | transcript_product=LSU ribosomal protein, mitochondrial, putative | l	LSU ribosomal protein	Tb927.11.10080	3	3	3	21.7	21.7	21.7	21.564	0	4.3775	73803000	8	3	3	3	3	3	3	3	3	3	3	3	3	3	3	3	3	3	3	3	3	3	3	3	3	189	189	21.7	21.7	21.7
	1.1563	0.0697745	-0.256467	0.837136	Tb927.6.1070:mRNA-p1	Tb927.6.1070:mRNA-p1	Tb927.6.1070:mRNA-p1 | transcript=Tb927.6.1070:mRNA | gene=Tb927.6.1070 | organism=Trypanosoma_brucei_brucei_TREU927 | gene_product=hypothetical protein, conserved | transcript_product=hypothetical protein, conserved | location=Tb927_06_v5.1:424852-427443(	hypothetical protein	Tb927.6.1070	3	3	3	5.9	5.9	5.9	94.554	0	4.0469	29555000	7	2	3	2	1	2	2	2	2	2	3	2	1	2	2	2	2	2	3	2	1	2	2	2	2	863	863	4.6	5.9	4.6
	1.15374	0.0701871	-0.231965	0.851474	Tb927.6.2370:mRNA-p1	Tb927.6.2370:mRNA-p1	Tb927.6.2370:mRNA-p1 | transcript=Tb927.6.2370:mRNA | gene=Tb927.6.2370 | organism=Trypanosoma_brucei_brucei_TREU927 | gene_product=ubiquitin-protein ligase, putative | transcript_product=ubiquitin-protein ligase, putative | location=Tb927_06_v5.1:729942-7	ubiquitin-protein ligase	Tb927.6.2370	3	3	3	3.3	3.3	3.3	121.77	0	4.2105	41140000	10	2	2	2	2	1	2	2	3	2	2	2	2	1	2	2	3	2	2	2	2	1	2	2	3	1084	1084	2.2	2.2	2.2
	1.15353	0.0702218	-0.162679	0.893364	Tb927.3.5090:mRNA-p1	Tb927.3.5090:mRNA-p1	Tb927.3.5090:mRNA-p1 | transcript=Tb927.3.5090:mRNA | gene=Tb927.3.5090 | organism=Trypanosoma_brucei_brucei_TREU927 | gene_product=tryparedoxin 2, putative | transcript_product=tryparedoxin 2, putative | location=Tb927_03_v5.1:1429044-1429640(+) | protein	tryparedoxin 2	Tb927.3.5090	8	8	8	47	47	47	22.18	0	23.6	1624800000	61	8	7	8	7	8	8	8	7	8	7	8	7	8	8	8	7	8	7	8	7	8	8	8	7	198	198	47	46	47
	1.15106	0.0706223	-0.14213	0.90618	Tb927.11.12680:mRNA-p1	Tb927.11.12680:mRNA-p1	Tb927.11.12680:mRNA-p1 | transcript=Tb927.11.12680:mRNA | gene=Tb927.11.12680 | organism=Trypanosoma_brucei_brucei_TREU927 | gene_product=prefoldin subunit 2, putative | transcript_product=prefoldin subunit 2, putative | location=Tb927_11_v5.1:3396629-3397	prefoldin subunit 2	Tb927.11.12680	8	8	8	58.6	58.6	58.6	15.902	0	27.5	1582500000	65	7	7	8	8	7	7	7	8	7	7	8	8	7	7	7	8	7	7	8	8	7	7	7	8	145	145	54.5	54.5	58.6
	1.15079	0.0706667	0.162821	1.11947	Tb927.11.800:mRNA-p1	Tb927.11.800:mRNA-p1	Tb927.11.800:mRNA-p1 | transcript=Tb927.11.800:mRNA | gene=Tb927.11.800 | organism=Trypanosoma_brucei_brucei_TREU927 | gene_product=prefoldin subunit, putative | transcript_product=prefoldin subunit, putative | location=Tb927_11_v5.1:204093-204467(+) | pro	prefoldin subunit	Tb927.11.800	5	5	5	36.3	36.3	36.3	14.186	0	14.876	585590000	26	4	5	4	5	5	4	4	4	4	5	4	5	5	4	4	4	4	5	4	5	5	4	4	4	124	124	29.8	36.3	30.6
	1.15007	0.0707833	0.233981	1.17608	Tb927.10.6820:mRNA-p1	Tb927.10.6820:mRNA-p1	Tb927.10.6820:mRNA-p1 | transcript=Tb927.10.6820:mRNA | gene=Tb927.10.6820 | organism=Trypanosoma_brucei_brucei_TREU927 | gene_product=hypothetical protein, conserved | transcript_product=hypothetical protein, conserved | location=Tb927_10_v5.1:1718893-171	hypothetical protein	Tb927.10.6820	5	5	5	21	21	21	34.82	0	12.095	167860000	27	5	4	5	4	5	4	3	5	5	4	5	4	5	4	3	5	5	4	5	4	5	4	3	5	314	314	21	13.4	21
	1.14903	0.0709524	0.066545	1.04721	Tb927.11.2610:mRNA-p1	Tb927.11.2610:mRNA-p1	Tb927.11.2610:mRNA-p1 | transcript=Tb927.11.2610:mRNA | gene=Tb927.11.2610 | organism=Trypanosoma_brucei_brucei_TREU927 | gene_product=hypothetical protein, conserved | transcript_product=hypothetical protein, conserved | location=Tb927_11_v5.1:766672-7680	hypothetical protein	Tb927.11.2610	26	26	26	70.5	70.5	70.5	50.887	0	323.31	19020000000	347	26	26	25	26	25	26	26	25	26	26	25	26	25	26	26	25	26	26	25	26	25	26	26	25	461	461	70.5	70.5	69
	1.14867	0.0710112	-0.177596	0.884175	Tb927.10.2470:mRNA-p1	Tb927.10.2470:mRNA-p1	Tb927.10.2470:mRNA-p1 | transcript=Tb927.10.2470:mRNA | gene=Tb927.10.2470 | organism=Trypanosoma_brucei_brucei_TREU927 | gene_product=Cleft lip and palate transmembrane protein 1 (CLPTM1), putative | transcript_product=Cleft lip and palate transmembrane p	Cleft lip and palate transmembrane protein 1 (CLPTM1)	Tb927.10.2470	9	9	9	20.5	20.5	20.5	64.233	0	26.012	258350000	42	8	8	8	8	9	7	8	9	8	8	8	8	9	7	8	9	8	8	8	8	9	7	8	9	550	550	17.6	18	18.9
	1.14833	0.0710669	0.148443	1.10837	Tb927.10.2380:mRNA-p1	Tb927.10.2380:mRNA-p1	Tb927.10.2380:mRNA-p1 | transcript=Tb927.10.2380:mRNA | gene=Tb927.10.2380 | organism=Trypanosoma_brucei_brucei_TREU927 | gene_product=Tetratricopeptide repeat, putative | transcript_product=Tetratricopeptide repeat, putative | location=Tb927_10_v5.1:60941	Tetratricopeptide repeat	Tb927.10.2380	23	23	23	36.2	36.2	36.2	102.45	0	103.51	1058600000	104	20	19	19	19	18	20	16	17	20	19	19	19	18	20	16	17	20	19	19	19	18	20	16	17	916	916	30.9	30.5	30.5
	1.14797	0.0711259	-0.11123	0.925798	Tb927.6.2550:mRNA-p1	Tb927.6.2550:mRNA-p1	Tb927.6.2550:mRNA-p1 | transcript=Tb927.6.2550:mRNA | gene=Tb927.6.2550 | organism=Trypanosoma_brucei_brucei_TREU927 | gene_product=RNA-binding protein, putative | transcript_product=RNA-binding protein, putative | location=Tb927_06_v5.1:771666-773933(+) |	RNA-binding protein	Tb927.6.2550	21	21	21	40.4	40.4	40.4	82.867	0	111.52	1408000000	149	19	19	20	19	21	21	21	20	19	19	20	19	21	21	21	20	19	19	20	19	21	21	21	20	755	755	37.5	37.2	38.5
	1.14343	0.0718734	-0.281143	0.822939	Tb927.11.940:mRNA-p1	Tb927.11.940:mRNA-p1	Tb927.11.940:mRNA-p1 | transcript=Tb927.11.940:mRNA | gene=Tb927.11.940 | organism=Trypanosoma_brucei_brucei_TREU927 | gene_product=KREPB5 | transcript_product=KREPB5 | location=Tb927_11_v5.1:241915-243063(+) | protein_length=382 | sequence_SO=chromosome |	KREPB5	Tb927.11.940	3	3	3	9.9	9.9	9.9	43.464	0.0090992	1.1259	188990000	4	1	2	1	2	2	2	2	1	1	2	1	2	2	2	2	1	1	2	1	2	2	2	2	1	382	382	3.9	6.5	3.9
	1.13874	0.0726534	-0.108324	0.927665	Tb927.11.8050:mRNA-p1	Tb927.11.8050:mRNA-p1	Tb927.11.8050:mRNA-p1 | transcript=Tb927.11.8050:mRNA | gene=Tb927.11.8050 | organism=Trypanosoma_brucei_brucei_TREU927 | gene_product=Sas10/Utp3/C1D family/Sas10 C-terminal domain containing protein, putative | transcript_product=Sas10/Utp3/C1D family/Sas	Sas10/Utp3/C1D family/Sas10 C-terminal domain containing protein	Tb927.11.8050	13	13	13	31.4	31.4	31.4	60.004	0	42.633	467180000	81	12	12	11	12	12	12	13	11	12	12	11	12	12	12	13	11	12	12	11	12	12	12	13	11	523	523	28.7	28.7	25
	1.13797	0.0727827	-0.131117	0.913124	Tb927.3.4660:mRNA-p1	Tb927.3.4660:mRNA-p1	Tb927.3.4660:mRNA-p1 | transcript=Tb927.3.4660:mRNA | gene=Tb927.3.4660 | organism=Trypanosoma_brucei_brucei_TREU927 | gene_product=WD domain, G-beta repeat, putative | transcript_product=WD domain, G-beta repeat, putative | location=Tb927_03_v5.1:1318525-	WD domain	Tb927.3.4660	9	9	9	23.3	23.3	23.3	63.424	0	45.924	262270000	34	5	7	7	5	7	7	7	7	5	7	7	5	7	7	7	7	5	7	7	5	7	7	7	7	596	596	15.8	18.8	18.8
	1.13657	0.0730183	-0.143463	0.905344	Tb927.11.1210:mRNA-p1	Tb927.11.1210:mRNA-p1	Tb927.11.1210:mRNA-p1 | transcript=Tb927.11.1210:mRNA | gene=Tb927.11.1210 | organism=Trypanosoma_brucei_brucei_TREU927 | gene_product=Domain of unknown function (DUF4470)/Domain of unknown function (DUF4471), putative | transcript_product=Domain of unknow	Domain of unknown function (DUF4470)/Domain of unknown function (DUF4471)	Tb927.11.1210	8	8	8	18.1	18.1	18.1	64.79	0	19.673	227620000	29	8	8	8	8	8	8	8	7	8	8	8	8	8	8	8	7	8	8	8	8	8	8	8	7	563	563	18.1	18.1	18.1
	1.13483	0.0733113	-0.0997186	0.933215	Tb927.11.6790:mRNA-p1	Tb927.11.6790:mRNA-p1	Tb927.11.6790:mRNA-p1 | transcript=Tb927.11.6790:mRNA | gene=Tb927.11.6790 | organism=Trypanosoma_brucei_brucei_TREU927 | gene_product=Nucleolar protein 89 | transcript_product=Nucleolar protein 89 | location=Tb927_11_v5.1:1915589-1917934(-) | protein_leng	Nucleolar protein 89	Tb927.11.6790	16	16	16	31	31	31	89.011	0	64.251	606780000	63	12	16	13	13	13	13	14	13	12	16	13	13	13	13	14	13	12	16	13	13	13	13	14	13	781	781	21.4	31	27.8
	1.13383	0.0734797	-0.296612	0.814162	Tb927.6.4360:mRNA-p1	Tb927.6.4360:mRNA-p1	Tb927.6.4360:mRNA-p1 | transcript=Tb927.6.4360:mRNA | gene=Tb927.6.4360 | organism=Trypanosoma_brucei_brucei_TREU927 | gene_product=hypothetical protein, conserved | transcript_product=hypothetical protein, conserved | location=Tb927_06_v5.1:1228784-122918	hypothetical protein	Tb927.6.4360	3	3	3	26.1	26.1	26.1	14.766	0	5.6121	32973000	9	3	2	2	2	2	2	1	3	3	2	2	2	2	2	1	3	3	2	2	2	2	2	1	3	134	134	26.1	14.9	14.9
	1.13211	0.0737722	-0.159595	0.895276	Tb927.8.1140:mRNA-p1	Tb927.8.1140:mRNA-p1	Tb927.8.1140:mRNA-p1 | transcript=Tb927.8.1140:mRNA | gene=Tb927.8.1140 | organism=Trypanosoma_brucei_brucei_TREU927 | gene_product=hypothetical protein, conserved | transcript_product=hypothetical protein, conserved | location=Tb927_08_v5.1:365167-366222(	hypothetical protein	Tb927.8.1140	6	6	6	30.8	30.8	30.8	38.292	0	32.509	333790000	42	6	6	6	6	6	6	6	6	6	6	6	6	6	6	6	6	6	6	6	6	6	6	6	6	351	351	30.8	30.8	30.8
	1.13125	0.0739187	0.0679111	1.0482	Tb927.3.5050:mRNA-p1	Tb927.3.5050:mRNA-p1	Tb927.3.5050:mRNA-p1 | transcript=Tb927.3.5050:mRNA | gene=Tb927.3.5050 | organism=Trypanosoma_brucei_brucei_TREU927 | gene_product=60S ribosomal protein L4 | transcript_product=60S ribosomal protein L4 | location=Tb927_03_v5.1:1417717-1418841(+) | protein	60S ribosomal protein L4	Tb927.3.5050	20	20	20	57.2	57.2	57.2	41.856	0	232.64	25487000000	341	19	19	19	18	20	19	19	20	19	19	19	18	20	19	19	20	19	19	19	18	20	19	19	20	374	374	55.3	55.3	55.3
	1.13087	0.0739825	0.065659	1.04656	Tb927.6.4590.2:mRNA-p1;Tb927.6.4590.1:mRNA-p1;Tb11.v5.0810.1-p1	Tb927.6.4590.2:mRNA-p1;Tb927.6.4590.1:mRNA-p1;Tb11.v5.0810.1-p1	Tb927.6.4590.2:mRNA-p1 | transcript=Tb927.6.4590.2:mRNA | gene=Tb927.6.4590 | organism=Trypanosoma_brucei_brucei_TREU927 | gene_product=glutamyl-tRNA synthetase, putative | transcript_product=glutamyl-tRNA synthetase, putative | location=Tb927_06_v5.1:1285	glutamyl-tRNA synthetase	Tb927.6.4590	34	34	34	59.3	59.3	59.3	68.931	0	142.05	3992000000	233	31	33	32	30	33	32	33	34	31	33	32	30	33	32	33	34	31	33	32	30	33	32	33	34	607	NaN	55.8	57.5	57.7
	1.13029	0.0740812	0.214258	1.16011	Tb927.9.5680:mRNA-p1	Tb927.9.5680:mRNA-p1	Tb927.9.5680:mRNA-p1 | transcript=Tb927.9.5680:mRNA | gene=Tb927.9.5680 | organism=Trypanosoma_brucei_brucei_TREU927 | gene_product=inositol/phosphatidylinositol phosphatase, putative | transcript_product=inositol/phosphatidylinositol phosphatase, putative	inositol/phosphatidylinositol phosphatase	Tb927.9.5680	3	3	3	4.5	4.5	4.5	87.964	0	5.7736	25972000	4	3	2	2	3	3	2	3	2	3	2	2	3	3	2	3	2	3	2	2	3	3	2	3	2	784	784	4.5	3.3	3.3
	1.12745	0.0745677	0.171041	1.12587	Tb927.7.2590:mRNA-p1	Tb927.7.2590:mRNA-p1	Tb927.7.2590:mRNA-p1 | transcript=Tb927.7.2590:mRNA | gene=Tb927.7.2590 | organism=Trypanosoma_brucei_brucei_TREU927 | gene_product=prefoldin, putative | transcript_product=prefoldin, putative | location=Tb927_07_v5.1:666864-667376(-) | protein_length=170	prefoldin	Tb927.7.2590	7	7	7	61.8	61.8	61.8	18.777	0	91.407	831040000	55	5	6	7	6	5	6	6	6	5	6	7	6	5	6	6	6	5	6	7	6	5	6	6	6	170	170	45.3	55.3	61.8
	1.12535	0.0749294	-0.149714	0.901429	Tb927.11.1700:mRNA-p1	Tb927.11.1700:mRNA-p1	Tb927.11.1700:mRNA-p1 | transcript=Tb927.11.1700:mRNA | gene=Tb927.11.1700 | organism=Trypanosoma_brucei_brucei_TREU927 | gene_product=hypothetical protein, conserved | transcript_product=hypothetical protein, conserved | location=Tb927_11_v5.1:518497-5202	hypothetical protein	Tb927.11.1700	9	9	9	28.6	28.6	28.6	61.63	0	85.779	637580000	59	9	9	8	9	9	8	8	9	9	9	8	9	9	8	8	9	9	9	8	9	9	8	8	9	570	570	28.6	28.6	27.2
	1.12489	0.0750079	-0.115129	0.9233	Tb927.3.3410:mRNA-p1;Tb11.v5.0768.1-p1	Tb927.3.3410:mRNA-p1;Tb11.v5.0768.1-p1	Tb927.3.3410:mRNA-p1 | transcript=Tb927.3.3410:mRNA | gene=Tb927.3.3410 | organism=Trypanosoma_brucei_brucei_TREU927 | gene_product=aspartyl aminopeptidase, putative | transcript_product=aspartyl aminopeptidase, putative | location=Tb927_03_v5.1:871164-872	aspartyl aminopeptidase	Tb927.3.3410	17	17	17	55.2	55.2	55.2	49.327	0	177.15	2308200000	146	15	16	16	17	15	16	15	14	15	16	16	17	15	16	15	14	15	16	16	17	15	16	15	14	451	NaN	46.8	53.7	53.7
	1.12386	0.0751871	0.280114	1.21429	Tb927.5.3580:mRNA-p1	Tb927.5.3580:mRNA-p1	Tb927.5.3580:mRNA-p1 | transcript=Tb927.5.3580:mRNA | gene=Tb927.5.3580 | organism=Trypanosoma_brucei_brucei_TREU927 | gene_product=phosphoglycerate mutase protein, putative | transcript_product=phosphoglycerate mutase protein, putative | location=Tb927_05	phosphoglycerate mutase protein	Tb927.5.3580	7	7	7	41.6	41.6	41.6	20.717	0	12.299	149690000	18	5	7	7	5	5	5	5	7	5	7	7	5	5	5	5	7	5	7	7	5	5	5	5	7	185	185	35.7	41.6	41.6
	1.12372	0.0752111	-0.284365	0.821103	Tb927.11.12030:mRNA-p1	Tb927.11.12030:mRNA-p1	Tb927.11.12030:mRNA-p1 | transcript=Tb927.11.12030:mRNA | gene=Tb927.11.12030 | organism=Trypanosoma_brucei_brucei_TREU927 | gene_product=hypothetical protein, conserved | transcript_product=hypothetical protein, conserved | location=Tb927_11_v5.1:3223665-	hypothetical protein	Tb927.11.12030	3	3	3	15.4	15.4	15.4	39.296	0	8.5919	48331000	13	3	3	3	3	3	3	2	3	3	3	3	3	3	3	2	3	3	3	3	3	3	3	2	3	356	356	15.4	15.4	15.4
	1.12323	0.075295	0.183444	1.13559	Tb927.9.2160:mRNA-p1	Tb927.9.2160:mRNA-p1	Tb927.9.2160:mRNA-p1 | transcript=Tb927.9.2160:mRNA | gene=Tb927.9.2160 | organism=Trypanosoma_brucei_brucei_TREU927 | gene_product=hypothetical protein, conserved | transcript_product=hypothetical protein, conserved | location=Tb927_09_v5.1:491279-491908(	hypothetical protein	Tb927.9.2160	4	4	4	30.6	30.6	30.6	22.67	0	4.6606	41861000	6	3	3	3	4	4	3	3	2	3	3	3	4	4	3	3	2	3	3	3	4	4	3	3	2	209	209	17.7	25.4	25.4
	1.11952	0.0759423	-0.318134	0.802106	Tb927.9.7260:mRNA-p1	Tb927.9.7260:mRNA-p1	Tb927.9.7260:mRNA-p1 | transcript=Tb927.9.7260:mRNA | gene=Tb927.9.7260 | organism=Trypanosoma_brucei_brucei_TREU927 | gene_product=phytanoyl-CoA dioxygenase (PhyH), putative | transcript_product=phytanoyl-CoA dioxygenase (PhyH), putative | location=Tb927_	phytanoyl-CoA dioxygenase (PhyH)	Tb927.9.7260	3	3	3	15.3	15.3	15.3	41.248	0	6.9507	33722000	11	2	3	3	3	1	2	3	3	2	3	3	3	1	2	3	3	2	3	3	3	1	2	3	3	366	366	11.7	15.3	15.3
	1.11842	0.0761338	-0.314626	0.80406	Tb927.8.8170:mRNA-p1	Tb927.8.8170:mRNA-p1	Tb927.8.8170:mRNA-p1 | transcript=Tb927.8.8170:mRNA | gene=Tb927.8.8170 | organism=Trypanosoma_brucei_brucei_TREU927 | gene_product=RNA editing mediator complex protein 5 | transcript_product=RNA editing mediator complex protein 5 | location=Tb927_08_v5.1:	RNA editing mediator complex protein 5	Tb927.8.8170	9	9	7	15.8	15.8	11	100.4	0	28.294	90274000	23	7	4	4	6	5	6	5	5	7	4	4	6	5	6	5	5	5	3	2	4	4	5	4	3	905	905	10.6	8.1	8.3
	1.11704	0.0763763	0.308791	1.23867	Tb927.6.4760:mRNA-p1	Tb927.6.4760:mRNA-p1	Tb927.6.4760:mRNA-p1 | transcript=Tb927.6.4760:mRNA | gene=Tb927.6.4760 | organism=Trypanosoma_brucei_brucei_TREU927 | gene_product=T-complex protein 11, putative | transcript_product=T-complex protein 11, putative | location=Tb927_06_v5.1:1324623-1327007(	T-complex protein 11	Tb927.6.4760	5	5	5	8.1	8.1	8.1	89.074	0	11.236	78128000	20	4	5	5	4	5	5	4	5	4	5	5	4	5	5	4	5	4	5	5	4	5	5	4	5	794	794	6.5	8.1	8.1
	1.11635	0.0764971	0.0870719	1.06221	Tb927.11.5680:mRNA-p1	Tb927.11.5680:mRNA-p1	Tb927.11.5680:mRNA-p1 | transcript=Tb927.11.5680:mRNA | gene=Tb927.11.5680 | organism=Trypanosoma_brucei_brucei_TREU927 | gene_product=dynein light chain 1, axonemal | transcript_product=dynein light chain 1, axonemal | location=Tb927_11_v5.1:1603384-16040	dynein light chain 1	Tb927.11.5680	9	9	9	57.6	57.6	57.6	23.96	0	49.443	719570000	54	9	9	9	8	7	9	8	9	9	9	9	8	7	9	8	9	9	9	9	8	7	9	8	9	210	210	57.6	57.6	57.6
	1.1157	0.0766127	-0.129272	0.914292	Tb927.10.5250:mRNA-p1;Tb11.v5.0232.1-p1	Tb927.10.5250:mRNA-p1;Tb11.v5.0232.1-p1	Tb927.10.5250:mRNA-p1 | transcript=Tb927.10.5250:mRNA | gene=Tb927.10.5250 | organism=Trypanosoma_brucei_brucei_TREU927 | gene_product=zinc finger protein family member, putative | transcript_product=zinc finger protein family member, putative | location=T	zinc finger protein family member	Tb927.10.5250	17	17	17	34.4	34.4	34.4	72.04	0	50.266	486540000	86	15	15	16	16	16	16	17	15	15	15	16	16	16	16	17	15	15	15	16	16	16	16	17	15	655	NaN	30.5	30.5	32.1
	1.11542	0.0766627	0.230051	1.17288	Tb927.10.13290:mRNA-p1	Tb927.10.13290:mRNA-p1	Tb927.10.13290:mRNA-p1 | transcript=Tb927.10.13290:mRNA | gene=Tb927.10.13290 | organism=Trypanosoma_brucei_brucei_TREU927 | gene_product=ethanolamine phosphotransferase (EPT) | transcript_product=ethanolamine phosphotransferase (EPT) | location=Tb927_10_v	ethanolamine phosphotransferase (EPT)	Tb927.10.13290	3	3	3	8.7	8.7	8.7	45.283	0	19.486	180710000	11	3	3	1	2	3	3	3	3	3	3	1	2	3	3	3	3	3	3	1	2	3	3	3	3	412	412	8.7	8.7	4.4
	1.11048	0.0775391	-0.508356	0.703023	Tb927.7.1490:mRNA-p1	Tb927.7.1490:mRNA-p1	Tb927.7.1490:mRNA-p1 | transcript=Tb927.7.1490:mRNA | gene=Tb927.7.1490 | organism=Trypanosoma_brucei_brucei_TREU927 | gene_product=hypothetical protein, conserved | transcript_product=hypothetical protein, conserved | location=Tb927_07_v5.1:377931-378671(	hypothetical protein	Tb927.7.1490	2	2	2	11	11	11	27.511	0	4.9883	28023000	8	2	2	1	2	2	2	2	2	2	2	1	2	2	2	2	2	2	2	1	2	2	2	2	2	246	246	11	11	5.7
	1.10596	0.0783501	0.2044	1.15221	Tb927.10.2670:mRNA-p1	Tb927.10.2670:mRNA-p1	Tb927.10.2670:mRNA-p1 | transcript=Tb927.10.2670:mRNA | gene=Tb927.10.2670 | organism=Trypanosoma_brucei_brucei_TREU927 | gene_product=hypothetical protein, conserved | transcript_product=hypothetical protein, conserved | location=Tb927_10_v5.1:690642-6910	hypothetical protein	Tb927.10.2670	2	2	2	19	19	19	13.766	0	5.438	48018000	13	2	2	2	2	2	2	2	2	2	2	2	2	2	2	2	2	2	2	2	2	2	2	2	2	121	121	19	19	19
	1.10505	0.0785147	-0.419863	0.747496	Tb927.9.11910:mRNA-p1	Tb927.9.11910:mRNA-p1	Tb927.9.11910:mRNA-p1 | transcript=Tb927.9.11910:mRNA | gene=Tb927.9.11910 | organism=Trypanosoma_brucei_brucei_TREU927 | gene_product=peroxidase, putative | transcript_product=peroxidase, putative | location=Tb927_09_v5.1:1861981-1863342(+) | protein_leng	peroxidase	Tb927.9.11910	3	3	3	10.4	10.4	10.4	51.808	0	5.8648	22187000	7	3	2	2	2	2	2	1	1	3	2	2	2	2	2	1	1	3	2	2	2	2	2	1	1	453	453	10.4	7.5	7.5
	1.10198	0.0790712	0.169145	1.12439	Tb927.5.1630:mRNA-p1	Tb927.5.1630:mRNA-p1	Tb927.5.1630:mRNA-p1 | transcript=Tb927.5.1630:mRNA | gene=Tb927.5.1630 | organism=Trypanosoma_brucei_brucei_TREU927 | gene_product=hypothetical protein, conserved | transcript_product=hypothetical protein, conserved | location=Tb927_05_v5.1:570736-571215(	hypothetical protein	Tb927.5.1630	4	4	4	40.3	40.3	40.3	17.683	0	11.339	102660000	18	4	4	4	3	4	4	4	3	4	4	4	3	4	4	4	3	4	4	4	3	4	4	4	3	159	159	40.3	40.3	40.3
	1.1006	0.0793222	-0.335061	0.792751	Tb927.1.3030:mRNA-p1	Tb927.1.3030:mRNA-p1	Tb927.1.3030:mRNA-p1 | transcript=Tb927.1.3030:mRNA | gene=Tb927.1.3030 | organism=Trypanosoma_brucei_brucei_TREU927 | gene_product=KREL2 | transcript_product=KREL2 | location=Tb927_01_v5.1:670282-671532(+) | protein_length=416 | sequence_SO=chromosome | S	KREL2	Tb927.1.3030	2	2	2	5	5	5	47.576	0	4.7251	20825000	7	2	2	2	2	2	2	2	1	2	2	2	2	2	2	2	1	2	2	2	2	2	2	2	1	416	416	5	5	5
	1.09455	0.0804359	0.152358	1.11138	Tb927.10.12940:mRNA-p1	Tb927.10.12940:mRNA-p1	Tb927.10.12940:mRNA-p1 | transcript=Tb927.10.12940:mRNA | gene=Tb927.10.12940 | organism=Trypanosoma_brucei_brucei_TREU927 | gene_product=predicted zinc finger protein | transcript_product=predicted zinc finger protein | location=Tb927_10_v5.1:3145406-3146	predicted zinc finger protein	Tb927.10.12940	8	8	8	32.1	32.1	32.1	34.477	0	60.972	895780000	50	7	6	8	6	7	7	7	7	7	6	8	6	7	7	7	7	7	6	8	6	7	7	7	7	324	324	28.7	26.2	32.1
	1.09431	0.0804806	0.0720725	1.05123	Tb927.9.4210:mRNA-p1;Tb11.v5.0561.1-p1	Tb927.9.4210:mRNA-p1;Tb11.v5.0561.1-p1	Tb927.9.4210:mRNA-p1 | transcript=Tb927.9.4210:mRNA | gene=Tb927.9.4210 | organism=Trypanosoma_brucei_brucei_TREU927 | gene_product=fatty acyl CoA synthetase 3 | transcript_product=fatty acyl CoA synthetase 3 | location=Tb927_09_v5.1:797920-800028(+) | pro	fatty acyl CoA synthetase 3	Tb927.9.4210	28	28	5	48	48	11.1	77.853	0	218.19	6383900000	283	25	25	26	25	26	26	27	26	25	25	26	25	26	26	27	26	4	4	4	5	4	5	5	4	702	NaN	45	45	45
	1.0921	0.0808912	0.22678	1.17022	Tb927.8.3650:mRNA-p1	Tb927.8.3650:mRNA-p1	Tb927.8.3650:mRNA-p1 | transcript=Tb927.8.3650:mRNA | gene=Tb927.8.3650 | organism=Trypanosoma_brucei_brucei_TREU927 | gene_product=folate transporter, putative | transcript_product=folate transporter, putative | location=Tb927_08_v5.1:1093216-1095114(-) |	folate transporter	Tb927.8.3650	7	7	1	11.9	11.9	3.3	69.928	0	16.337	164690000	32	7	6	7	6	6	7	5	5	7	6	7	6	6	7	5	5	1	1	1	1	1	1	1	1	632	632	11.9	9.7	11.9
	1.09039	0.0812108	-0.0795431	0.946357	Tb927.10.10140:mRNA-p1	Tb927.10.10140:mRNA-p1	Tb927.10.10140:mRNA-p1 | transcript=Tb927.10.10140:mRNA | gene=Tb927.10.10140 | organism=Trypanosoma_brucei_brucei_TREU927 | gene_product=paraflagellar rod component, putative | transcript_product=paraflagellar rod component, putative | location=Tb927_10_v	paraflagellar rod component	Tb927.10.10140	17	17	17	70.1	70.1	70.1	37.014	0	309.15	10979000000	207	16	16	15	16	16	17	16	14	16	16	15	16	16	17	16	14	16	16	15	16	16	17	16	14	331	331	70.1	70.1	70.1
	1.08461	0.0822978	-0.107632	0.92811	Tb927.10.11700:mRNA-p1	Tb927.10.11700:mRNA-p1	Tb927.10.11700:mRNA-p1 | transcript=Tb927.10.11700:mRNA | gene=Tb927.10.11700 | organism=Trypanosoma_brucei_brucei_TREU927 | gene_product=guanylate kinase, putative | transcript_product=guanylate kinase, putative | location=Tb927_10_v5.1:2859117-2859737(+)	guanylate kinase	Tb927.10.11700	10	10	10	47.1	47.1	47.1	22.894	0	25.192	1573800000	83	10	10	10	9	10	10	10	10	10	10	10	9	10	10	10	10	10	10	10	9	10	10	10	10	206	206	47.1	47.1	47.1
	1.08373	0.0824643	-0.118045	0.921436	Tb927.11.6820:mRNA-p1;Tb11.v5.0900.1-p1	Tb927.11.6820:mRNA-p1;Tb11.v5.0900.1-p1	Tb927.11.6820:mRNA-p1 | transcript=Tb927.11.6820:mRNA | gene=Tb927.11.6820 | organism=Trypanosoma_brucei_brucei_TREU927 | gene_product=hypothetical protein, conserved | transcript_product=hypothetical protein, conserved | location=Tb927_11_v5.1:1924136-192	hypothetical protein	Tb927.11.6820	6	6	6	17.5	17.5	17.5	51.6	0	18.265	161450000	34	4	5	6	5	5	5	5	5	4	5	6	5	5	5	5	5	4	5	6	5	5	5	5	5	473	NaN	11.2	15.9	17.5
	1.08117	0.0829524	-0.182731	0.881034	Tb927.11.13750:mRNA-p1	Tb927.11.13750:mRNA-p1	Tb927.11.13750:mRNA-p1 | transcript=Tb927.11.13750:mRNA | gene=Tb927.11.13750 | organism=Trypanosoma_brucei_brucei_TREU927 | gene_product=Ras-related protein Rab4 | transcript_product=Ras-related protein Rab4 | location=Tb927_11_v5.1:3669517-3670113(+) | p	Ras-related protein Rab4	Tb927.11.13750	9	8	8	66.2	60.6	60.6	22.057	0	30.01	243990000	35	8	9	8	8	8	9	9	8	7	8	7	7	7	8	8	7	7	8	7	7	7	8	8	7	198	198	59.1	66.2	59.1
	1.08093	0.082998	-0.111237	0.925794	Tb927.11.540.1-p1;Tb927.11.540.2-p1	Tb927.11.540.1-p1;Tb927.11.540.2-p1	Tb927.11.540.1-p1 | transcript=Tb927.11.540.1 | gene=Tb927.11.540 | organism=Trypanosoma_brucei_brucei_TREU927 | gene_product=ABC transporter, mitochondrial, putative | transcript_product=ABC transporter, mitochondrial, putative | location=Tb927_11_v5.1:13	ABC transporter	Tb927.11.540	9	9	9	25.1	25.1	25.1	72.968	0	67.63	213830000	33	6	7	9	8	6	7	6	7	6	7	9	8	6	7	6	7	6	7	9	8	6	7	6	7	665	NaN	16.4	18.9	25.1
	1.08069	0.0830441	-0.251795	0.839851	Tb927.11.10130:mRNA-p1	Tb927.11.10130:mRNA-p1	Tb927.11.10130:mRNA-p1 | transcript=Tb927.11.10130:mRNA | gene=Tb927.11.10130 | organism=Trypanosoma_brucei_brucei_TREU927 | gene_product=hypothetical protein, conserved | transcript_product=hypothetical protein, conserved | location=Tb927_11_v5.1:2713503-	hypothetical protein	Tb927.11.10130	2	2	2	6.8	6.8	6.8	34.304	0	3.6932	30730000	11	2	2	2	2	2	2	2	2	2	2	2	2	2	2	2	2	2	2	2	2	2	2	2	2	324	324	6.8	6.8	6.8
	1.07886	0.0833944	-0.0999789	0.933047	Tb927.2.6320:mRNA-p1	Tb927.2.6320:mRNA-p1	Tb927.2.6320:mRNA-p1 | transcript=Tb927.2.6320:mRNA | gene=Tb927.2.6320 | organism=Trypanosoma_brucei_brucei_TREU927 | gene_product=adenosine transporter 2, putative | transcript_product=adenosine transporter 2, putative | location=Tb927_02_v5.1:1159520-11	adenosine transporter 2	Tb927.2.6320	3	2	1	8	5.2	3	50.856	0	3.971	89717000	7	3	3	3	3	2	3	3	3	2	2	2	2	1	2	2	2	1	1	1	1	0	1	1	1	462	462	8	8	8
	1.07878	0.0834113	-0.145438	0.904105	Tb927.6.3810.1:mRNA-p1;Tb927.6.3810.2:mRNA-p1	Tb927.6.3810.1:mRNA-p1;Tb927.6.3810.2:mRNA-p1	Tb927.6.3810.1:mRNA-p1 | transcript=Tb927.6.3810.1:mRNA | gene=Tb927.6.3810 | organism=Trypanosoma_brucei_brucei_TREU927 | gene_product=hypothetical protein, conserved | transcript_product=hypothetical protein, conserved | location=Tb927_06_v5.1:1128949-11	hypothetical protein	Tb927.6.3810	5	5	5	20	20	20	50.719	0	24.182	147990000	30	5	5	5	5	5	5	5	5	5	5	5	5	5	5	5	5	5	5	5	5	5	5	5	5	456	NaN	20	20	20
	1.07469	0.0841996	-0.248578	0.841726	Tb927.10.1720:mRNA-p1	Tb927.10.1720:mRNA-p1	Tb927.10.1720:mRNA-p1 | transcript=Tb927.10.1720:mRNA | gene=Tb927.10.1720 | organism=Trypanosoma_brucei_brucei_TREU927 | gene_product=ATP-dependent DEAD/H RNA helicase, putative | transcript_product=ATP-dependent DEAD/H RNA helicase, putative | location=T	ATP-dependent DEAD/H RNA helicase	Tb927.10.1720	6	6	6	15.6	15.6	15.6	66.419	0	22.975	97916000	18	4	6	6	5	5	4	5	6	4	6	6	5	5	4	5	6	4	6	6	5	5	4	5	6	596	596	7.7	15.6	15.6
	1.07416	0.0843029	0.164141	1.1205	Tb927.7.6450:mRNA-p1	Tb927.7.6450:mRNA-p1	Tb927.7.6450:mRNA-p1 | transcript=Tb927.7.6450:mRNA | gene=Tb927.7.6450 | organism=Trypanosoma_brucei_brucei_TREU927 | gene_product=tRNA-dihydrouridine synthase 3, putative | transcript_product=tRNA-dihydrouridine synthase 3, putative | location=Tb927_07_v	tRNA-dihydrouridine synthase 3	Tb927.7.6450	5	5	5	13.3	13.3	13.3	59.181	0	13.186	87241000	23	5	5	5	4	5	5	5	5	5	5	5	4	5	5	5	5	5	5	5	4	5	5	5	5	528	528	13.3	13.3	13.3
	1.07299	0.0845303	-0.343604	0.78807	Tb927.11.5560:mRNA-p1	Tb927.11.5560:mRNA-p1	Tb927.11.5560:mRNA-p1 | transcript=Tb927.11.5560:mRNA | gene=Tb927.11.5560 | organism=Trypanosoma_brucei_brucei_TREU927 | gene_product=hypothetical protein, conserved | transcript_product=hypothetical protein, conserved | location=Tb927_11_v5.1:1575286-157	hypothetical protein	Tb927.11.5560	1	1	1	1.9	1.9	1.9	81.576	0.0095238	1.0886	10334000	3	1	1	1	1	1	1	1	1	1	1	1	1	1	1	1	1	1	1	1	1	1	1	1	1	752	752	1.9	1.9	1.9
	1.0716	0.0848005	-0.259225	0.835536	Tb927.11.11660:mRNA-p1	Tb927.11.11660:mRNA-p1	Tb927.11.11660:mRNA-p1 | transcript=Tb927.11.11660:mRNA | gene=Tb927.11.11660 | organism=Trypanosoma_brucei_brucei_TREU927 | gene_product=conserved protein | transcript_product=conserved protein | location=Tb927_11_v5.1:3129244-3130332(+) | protein_length=	conserved protein	Tb927.11.11660	3	3	3	11.9	11.9	11.9	39.79	0	6.7014	74897000	9	2	3	2	2	2	2	3	2	2	3	2	2	2	2	3	2	2	3	2	2	2	2	3	2	362	362	8	11.9	8
	1.07156	0.0848078	0.0978589	1.07018	Tb927.9.10920:mRNA-p1	Tb927.9.10920:mRNA-p1	Tb927.9.10920:mRNA-p1 | transcript=Tb927.9.10920:mRNA | gene=Tb927.9.10920 | organism=Trypanosoma_brucei_brucei_TREU927 | gene_product=kinetoplastid kinetochore protein 3 | transcript_product=kinetoplastid kinetochore protein 3 | location=Tb927_09_v5.1:171	kinetoplastid kinetochore protein 3	Tb927.9.10920	8	8	8	10.8	10.8	10.8	118.15	0	24.055	225750000	45	6	7	7	7	6	6	7	6	6	7	7	7	6	6	7	6	6	7	7	7	6	6	7	6	1058	1058	8.5	10	10
	1.0695	0.0852122	0.239777	1.18081	Tb927.11.10110:mRNA-p1	Tb927.11.10110:mRNA-p1	Tb927.11.10110:mRNA-p1 | transcript=Tb927.11.10110:mRNA | gene=Tb927.11.10110 | organism=Trypanosoma_brucei_brucei_TREU927 | gene_product=actin-like protein, putative | transcript_product=actin-like protein, putative | location=Tb927_11_v5.1:2708713-270989	actin-like protein	Tb927.11.10110	2	2	2	6.3	6.3	6.3	43.483	0	4.3849	41112000	11	2	2	2	2	2	2	2	1	2	2	2	2	2	2	2	1	2	2	2	2	2	2	2	1	394	394	6.3	6.3	6.3
	1.06831	0.0854452	-0.137053	0.909375	Tb927.11.14960:mRNA-p1	Tb927.11.14960:mRNA-p1	Tb927.11.14960:mRNA-p1 | transcript=Tb927.11.14960:mRNA | gene=Tb927.11.14960 | organism=Trypanosoma_brucei_brucei_TREU927 | gene_product=pumilio/PUF RNA binding protein 7, putative | transcript_product=pumilio/PUF RNA binding protein 7, putative | locatio	pumilio/PUF RNA binding protein 7	Tb927.11.14960	16	16	16	29.4	29.4	29.4	78.663	0	28.467	341600000	54	13	15	14	13	14	14	13	14	13	15	14	13	14	14	13	14	13	15	14	13	14	14	13	14	704	704	25	28	24.3
	1.06815	0.0854779	-0.286673	0.819791	Tb927.4.2630:mRNA-p1	Tb927.4.2630:mRNA-p1	Tb927.4.2630:mRNA-p1 | transcript=Tb927.4.2630:mRNA | gene=Tb927.4.2630 | organism=Trypanosoma_brucei_brucei_TREU927 | gene_product=ATP-dependent DEAD/H RNA helicase, putative | transcript_product=ATP-dependent DEAD/H RNA helicase, putative | location=Tb92	ATP-dependent DEAD/H RNA helicase	Tb927.4.2630	7	7	7	12	12	12	94.94	0	15.143	115060000	32	6	7	5	6	4	6	6	5	6	7	5	6	4	6	6	5	6	7	5	6	4	6	6	5	843	843	10.7	12	7.6
	1.06737	0.0856313	0.389245	1.30971	Tb927.11.8185:mRNA-p1	Tb927.11.8185:mRNA-p1	Tb927.11.8185:mRNA-p1 | transcript=Tb927.11.8185:mRNA | gene=Tb927.11.8185 | organism=Trypanosoma_brucei_brucei_TREU927 | gene_product=Zinc finger, C3HC4 type (RING finger) containing protein, putative | transcript_product=Zinc finger, C3HC4 type (RING fin	Zinc finger	Tb927.11.8185	2	2	2	26.9	26.9	26.9	7.1883	0.0014409	1.8968	415230000	4	2	2	1	2	1	1	2	2	2	2	1	2	1	1	2	2	2	2	1	2	1	1	2	2	67	67	26.9	26.9	14.9
	1.06416	0.0862657	0.120265	1.08693	Tb927.10.5950:mRNA-p1;Tb11.v5.0190.1-p1	Tb927.10.5950:mRNA-p1;Tb11.v5.0190.1-p1	Tb927.10.5950:mRNA-p1 | transcript=Tb927.10.5950:mRNA | gene=Tb927.10.5950 | organism=Trypanosoma_brucei_brucei_TREU927 | gene_product=Serine/threonine-protein kinase NEK17, putative | transcript_product=Serine/threonine-protein kinase NEK17, putative | lo	Serine/threonine-protein kinase NEK17	Tb927.10.5950	15	15	2	38.5	38.5	8.1	54.968	0	86.653	1197600000	105	14	14	14	15	15	13	14	15	14	14	14	15	15	13	14	15	1	1	1	2	2	1	1	2	494	NaN	34.6	34.6	34.6
	1.06347	0.0864039	0.262163	1.19928	Tb11.v5.0520.1-p1;Tb927.8.3310:mRNA-p1	Tb11.v5.0520.1-p1;Tb927.8.3310:mRNA-p1	Tb11.v5.0520.1-p1 | transcript=Tb11.v5.0520.1 | gene=Tb11.v5.0520 | organism=Trypanosoma_brucei_brucei_TREU927 | gene_product=acetyltransferase, putative | transcript_product=acetyltransferase, putative | location=Tb927_11_bin_v5.1:2180235-2181710(-) | pro	acetyltransferase	Tb11.v5.0520	3	3	3	7.7	7.7	7.7	56.168	0	5.2994	56377000	9	3	3	3	3	3	3	2	3	3	3	3	3	3	3	2	3	3	3	3	3	3	3	2	3	491	NaN	7.7	7.7	7.7
	1.06321	0.086454	0.137728	1.10017	Tb927.8.8200:mRNA-p1	Tb927.8.8200:mRNA-p1	Tb927.8.8200:mRNA-p1 | transcript=Tb927.8.8200:mRNA | gene=Tb927.8.8200 | organism=Trypanosoma_brucei_brucei_TREU927 | gene_product=Flagellar-associated protein 59, putative | transcript_product=Flagellar-associated protein 59, putative | location=Tb927_08	Flagellar-associated protein 59	Tb927.8.8200	18	18	3	26.1	26.1	6	99.865	0	76.924	391630000	70	15	16	18	15	15	16	16	16	15	16	18	15	15	16	16	16	3	3	3	3	3	3	3	2	856	856	23.2	23.4	26.1
	1.06056	0.0869847	-0.292004	0.816767	Tb927.11.2990:mRNA-p1	Tb927.11.2990:mRNA-p1	Tb927.11.2990:mRNA-p1 | transcript=Tb927.11.2990:mRNA | gene=Tb927.11.2990 | organism=Trypanosoma_brucei_brucei_TREU927 | gene_product=KREPB4 | transcript_product=KREPB4 | location=Tb927_11_v5.1:865857-867101(-) | protein_length=414 | sequence_SO=chromosom	KREPB4	Tb927.11.2990	2	2	2	5.6	5.6	5.6	46.39	0	3.3999	22914000	9	2	2	2	2	2	2	2	2	2	2	2	2	2	2	2	2	2	2	2	2	2	2	2	2	414	414	5.6	5.6	5.6
	1.05872	0.0873527	-0.18489	0.879716	Tb927.3.5640:mRNA-p1	Tb927.3.5640:mRNA-p1	Tb927.3.5640:mRNA-p1 | transcript=Tb927.3.5640:mRNA | gene=Tb927.3.5640 | organism=Trypanosoma_brucei_brucei_TREU927 | gene_product=nuclear transcription factor, putative | transcript_product=nuclear transcription factor, putative | location=Tb927_03_v5.1:	nuclear transcription factor	Tb927.3.5640	8	8	8	28.1	28.1	28.1	59.544	0	15.77	148360000	21	7	7	6	5	7	6	5	5	7	7	6	5	7	6	5	5	7	7	6	5	7	6	5	5	545	545	24.2	24.2	21.8
	1.0584	0.0874177	-0.0607662	0.958755	Tb927.9.11110:mRNA-p1	Tb927.9.11110:mRNA-p1	Tb927.9.11110:mRNA-p1 | transcript=Tb927.9.11110:mRNA | gene=Tb927.9.11110 | organism=Trypanosoma_brucei_brucei_TREU927 | gene_product=U5 snRNA-associated splicing factor | transcript_product=U5 snRNA-associated splicing factor | location=Tb927_09_v5.1:175	U5 snRNA-associated splicing factor	Tb927.9.11110	32	32	32	18.3	18.3	18.3	277	0	87.059	608610000	118	30	29	27	31	27	27	28	26	30	29	27	31	27	27	28	26	30	29	27	31	27	27	28	26	2403	2403	17.1	16.8	16.1
	1.05692	0.087717	-0.262068	0.833892	Tb927.3.4600:mRNA-p1	Tb927.3.4600:mRNA-p1	Tb927.3.4600:mRNA-p1 | transcript=Tb927.3.4600:mRNA | gene=Tb927.3.4600 | organism=Trypanosoma_brucei_brucei_TREU927 | gene_product=hypothetical protein, conserved | transcript_product=hypothetical protein, conserved | location=Tb927_03_v5.1:1289776-129301	hypothetical protein	Tb927.3.4600	4	4	4	5.1	5.1	5.1	121.4	0	8.8013	70862000	12	4	4	3	3	4	4	4	4	4	4	3	3	4	4	4	4	4	4	3	3	4	4	4	4	1079	1079	5.1	5.1	3.9
	1.0544	0.0882273	0.311295	1.24082	Tb927.7.5750:mRNA-p1	Tb927.7.5750:mRNA-p1	Tb927.7.5750:mRNA-p1 | transcript=Tb927.7.5750:mRNA | gene=Tb927.7.5750 | organism=Trypanosoma_brucei_brucei_TREU927 | gene_product=Anaphase promoting complex-associated Protein AP2 | transcript_product=Anaphase promoting complex-associated Protein AP2 | l	Anaphase promoting complex-associated Protein AP2	Tb927.7.5750	4	4	4	4	4	4	116.49	0.00049665	2.3945	1830700000	7	4	4	3	4	4	3	4	3	4	4	3	4	4	3	4	3	4	4	3	4	4	3	4	3	1063	1063	4	4	3.2
	1.05429	0.0882486	0.108159	1.07785	Tb927.8.4640:mRNA-p1	Tb927.8.4640:mRNA-p1	Tb927.8.4640:mRNA-p1 | transcript=Tb927.8.4640:mRNA | gene=Tb927.8.4640 | organism=Trypanosoma_brucei_brucei_TREU927 | gene_product=Component of motile flagella 19 | transcript_product=Component of motile flagella 19 | location=Tb927_08_v5.1:1366682-136783	Component of motile flagella 19	Tb927.8.4640	14	14	14	34.3	34.3	34.3	46.865	0	82.84	1208300000	87	13	14	14	14	14	14	13	13	13	14	14	14	14	14	13	13	13	14	14	14	14	14	13	13	385	385	31.7	34.3	34.3
	1.05322	0.0884665	-0.112861	0.924752	Tb927.8.4810:mRNA-p1	Tb927.8.4810:mRNA-p1	Tb927.8.4810:mRNA-p1 | transcript=Tb927.8.4810:mRNA | gene=Tb927.8.4810 | organism=Trypanosoma_brucei_brucei_TREU927 | gene_product=prohibitin 1 | transcript_product=prohibitin 1 | location=Tb927_08_v5.1:1420939-1421772(-) | protein_length=277 | sequence_S	prohibitin 1	Tb927.8.4810	8	8	8	27.4	27.4	27.4	31.429	0	15.957	272430000	32	5	7	8	5	4	5	6	7	5	7	8	5	4	5	6	7	5	7	8	5	4	5	6	7	277	277	18.4	24.5	27.4
	1.05191	0.0887348	0.267951	1.2041	Tb927.2.2270:mRNA-p1	Tb927.2.2270:mRNA-p1	Tb927.2.2270:mRNA-p1 | transcript=Tb927.2.2270:mRNA | gene=Tb927.2.2270 | organism=Trypanosoma_brucei_brucei_TREU927 | gene_product=hypothetical protein, conserved | transcript_product=hypothetical protein, conserved | location=Tb927_02_v5.1:447296-447985(	hypothetical protein	Tb927.2.2270	4	4	4	23.1	23.1	23.1	26.336	0	14.826	62339000	18	4	3	2	4	4	3	4	3	4	3	2	4	4	3	4	3	4	3	2	4	4	3	4	3	229	229	23.1	22.7	12.7
	1.05033	0.0890567	0.258368	1.19613	Tb927.1.5060:mRNA-p1	Tb927.1.5060:mRNA-p1	Tb927.1.5060:mRNA-p1 | transcript=Tb927.1.5060:mRNA | gene=Tb927.1.5060 | organism=Trypanosoma_brucei_brucei_TREU927 | gene_product=variant surface glycoprotein (VSG)-related, putative | transcript_product=variant surface glycoprotein (VSG)-related, putati	variant surface glycoprotein (VSG)-related	Tb927.1.5060	2	2	1	4.9	4.9	2	38.176	0	4.2041	31275000	8	1	1	2	1	1	1	2	1	1	1	2	1	1	1	2	1	0	0	1	0	0	1	1	0	345	345	2.9	2.9	4.9
	1.04994	0.0891376	0.228326	1.17148	Tb927.5.3410:mRNA-p1	Tb927.5.3410:mRNA-p1	Tb927.5.3410:mRNA-p1 | transcript=Tb927.5.3410:mRNA | gene=Tb927.5.3410 | organism=Trypanosoma_brucei_brucei_TREU927 | gene_product=Mitochondrial ribosomal protein L9 | transcript_product=Mitochondrial ribosomal protein L9 | location=Tb927_05_v5.1:1134803-	Mitochondrial ribosomal protein L9	Tb927.5.3410	3	3	3	13.3	13.3	13.3	30.982	0	4.4122	35841000	9	3	2	3	3	2	3	3	2	3	2	3	3	2	3	3	2	3	2	3	3	2	3	3	2	263	263	13.3	9.5	13.3
	1.04777	0.0895831	-0.148979	0.901888	Tb927.11.14170:mRNA-p1	Tb927.11.14170:mRNA-p1	Tb927.11.14170:mRNA-p1 | transcript=Tb927.11.14170:mRNA | gene=Tb927.11.14170 | organism=Trypanosoma_brucei_brucei_TREU927 | gene_product=hypothetical protein, conserved | transcript_product=hypothetical protein, conserved | location=Tb927_11_v5.1:3755632-	hypothetical protein	Tb927.11.14170	5	5	5	13.1	13.1	13.1	67.163	0	17.41	112250000	21	4	5	4	5	4	5	5	4	4	5	4	5	4	5	5	4	4	5	4	5	4	5	5	4	618	618	11.8	13.1	11.8
	1.04529	0.0900977	-0.0464025	0.968348	Tb927.9.6760:mRNA-p1	Tb927.9.6760:mRNA-p1	Tb927.9.6760:mRNA-p1 | transcript=Tb927.9.6760:mRNA | gene=Tb927.9.6760 | organism=Trypanosoma_brucei_brucei_TREU927 | gene_product=hypothetical protein, conserved | transcript_product=hypothetical protein, conserved | location=Tb927_09_v5.1:1111552-111243	hypothetical protein	Tb927.9.6760	2	2	2	10.3	10.3	10.3	33.943	0	6.1516	21067000	6	2	2	2	2	1	2	2	1	2	2	2	2	1	2	2	1	2	2	2	2	1	2	2	1	292	292	10.3	10.3	10.3
	1.04113	0.0909651	-0.158722	0.895818	Tb927.11.5650:mRNA-p1	Tb927.11.5650:mRNA-p1	Tb927.11.5650:mRNA-p1 | transcript=Tb927.11.5650:mRNA | gene=Tb927.11.5650 | organism=Trypanosoma_brucei_brucei_TREU927 | gene_product=replication factor C, subunit 1, putative | transcript_product=replication factor C, subunit 1, putative | location=Tb927	replication factor C	Tb927.11.5650	14	14	14	33.6	33.6	33.6	65.046	0	38.055	279230000	45	11	14	13	13	12	12	13	11	11	14	13	13	12	12	13	11	11	14	13	13	12	12	13	11	587	587	24	33.6	30.8
	1.04013	0.0911747	0.162356	1.11911	Tb927.11.11210:mRNA-p1	Tb927.11.11210:mRNA-p1	Tb927.11.11210:mRNA-p1 | transcript=Tb927.11.11210:mRNA | gene=Tb927.11.11210 | organism=Trypanosoma_brucei_brucei_TREU927 | gene_product=paraflagellar rod component, putative | transcript_product=paraflagellar rod component, putative | location=Tb927_11_v	paraflagellar rod component	Tb927.11.11210	11	11	11	37.5	37.5	37.5	41.94	0	42.45	644190000	79	11	10	10	11	10	10	10	10	11	10	10	11	10	10	10	10	11	10	10	11	10	10	10	10	360	360	37.5	34.2	34.2
	1.03509	0.0922388	-0.0521879	0.964473	Tb927.11.14120:mRNA-p1	Tb927.11.14120:mRNA-p1	Tb927.11.14120:mRNA-p1 | transcript=Tb927.11.14120:mRNA | gene=Tb927.11.14120 | organism=Trypanosoma_brucei_brucei_TREU927 | gene_product=phenylalanyl-tRNA synthetase alpha chain, putative | transcript_product=phenylalanyl-tRNA synthetase alpha chain, puta	phenylalanyl-tRNA synthetase alpha chain	Tb927.11.14120	16	16	16	42.1	42.1	42.1	57.056	0	74.426	1941300000	130	16	16	16	16	16	16	15	16	16	16	16	16	16	16	15	16	16	16	16	16	16	16	15	16	496	496	42.1	42.1	42.1
	1.03387	0.0924982	-0.168826	0.889567	Tb927.7.6670:mRNA-p1;Tb11.v5.0444.1-p1	Tb927.7.6670:mRNA-p1	Tb927.7.6670:mRNA-p1 | transcript=Tb927.7.6670:mRNA | gene=Tb927.7.6670 | organism=Trypanosoma_brucei_brucei_TREU927 | gene_product=hypothetical protein, conserved | transcript_product=hypothetical protein, conserved | location=Tb927_07_v5.1:1829565-183865	hypothetical protein	Tb927.7.6670	16	16	16	7.5	7.5	7.5	332.9	0	22.567	1044300000	52	15	15	14	13	13	13	13	13	15	15	14	13	13	13	13	13	15	15	14	13	13	13	13	13	3030	NaN	7	7	6.6
	1.03251	0.0927867	-0.0654263	0.955663	Tb927.9.2900:mRNA-p1	Tb927.9.2900:mRNA-p1	Tb927.9.2900:mRNA-p1 | transcript=Tb927.9.2900:mRNA | gene=Tb927.9.2900 | organism=Trypanosoma_brucei_brucei_TREU927 | gene_product=U3 small nucleolar RNA-associated protein 10, putative | transcript_product=U3 small nucleolar RNA-associated protein 10, pu	U3 small nucleolar RNA-associated protein 10	Tb927.9.2900	36	36	36	20.4	20.4	20.4	287.19	0	129.76	1921100000	122	30	32	32	30	33	33	34	32	30	32	32	30	33	33	34	32	30	32	32	30	33	33	34	32	2631	2631	17.2	18.5	18.1
	1.03152	0.0929986	-0.216522	0.860638	Tb11.v5.0853.1-p1;Tb927.10.10020:mRNA-p1	Tb11.v5.0853.1-p1;Tb927.10.10020:mRNA-p1	Tb11.v5.0853.1-p1 | transcript=Tb11.v5.0853.1 | gene=Tb11.v5.0853 | organism=Trypanosoma_brucei_brucei_TREU927 | gene_product=Vacuolar sorting protein 9 (VPS9) domain containing protein, putative | transcript_product=Vacuolar sorting protein 9 (VPS9) domai	Vacuolar sorting protein 9 (VPS9) domain containing protein	Tb11.v5.0853	7	7	7	14.6	14.6	14.6	60.394	0	9.3682	70526000	14	6	5	5	6	7	7	5	4	6	5	5	6	7	7	5	4	6	5	5	6	7	7	5	4	541	NaN	12.8	10.4	10.4
	1.03135	0.0930351	0.133395	1.09687	Tb927.9.4420:mRNA-p1	Tb927.9.4420:mRNA-p1	Tb927.9.4420:mRNA-p1 | transcript=Tb927.9.4420:mRNA | gene=Tb927.9.4420 | organism=Trypanosoma_brucei_brucei_TREU927 | gene_product=Beat-regulation protein | transcript_product=Beat-regulation protein | location=Tb927_09_v5.1:826128-827375(+) | protein_len	Beat-regulation protein	Tb927.9.4420	10	10	10	34.9	34.9	34.9	46.604	0	54.299	489350000	61	10	8	8	8	8	8	9	7	10	8	8	8	8	8	9	7	10	8	8	8	8	8	9	7	415	415	34.9	29.6	29.6
	1.03095	0.0931225	-0.154743	0.898292	Tb927.1.1700:mRNA-p1	Tb927.1.1700:mRNA-p1	Tb927.1.1700:mRNA-p1 | transcript=Tb927.1.1700:mRNA | gene=Tb927.1.1700 | organism=Trypanosoma_brucei_brucei_TREU927 | gene_product=AATF protein, putative | transcript_product=AATF protein, putative | location=Tb927_01_v5.1:428876-430357(+) | protein_lengt	AATF protein	Tb927.1.1700	6	6	6	15.6	15.6	15.6	55.093	0	18.753	144500000	28	4	5	6	5	4	6	5	5	4	5	6	5	4	6	5	5	4	5	6	5	4	6	5	5	493	493	12.4	14	15.6
	1.03076	0.0931617	-0.278604	0.824388	Tb927.10.15170:mRNA-p1	Tb927.10.15170:mRNA-p1	Tb927.10.15170:mRNA-p1 | transcript=Tb927.10.15170:mRNA | gene=Tb927.10.15170 | organism=Trypanosoma_brucei_brucei_TREU927 | gene_product=hypothetical protein, conserved | transcript_product=hypothetical protein, conserved | location=Tb927_10_v5.1:3699405-	hypothetical protein	Tb927.10.15170	7	7	7	14	14	14	77.347	0	14.058	136110000	19	7	5	7	6	7	6	6	7	7	5	7	6	7	6	6	7	7	5	7	6	7	6	6	7	695	695	14	10.4	14
	1.02959	0.0934132	-0.0681081	0.953888	Tb927.3.4630:mRNA-p1	Tb927.3.4630:mRNA-p1	Tb927.3.4630:mRNA-p1 | transcript=Tb927.3.4630:mRNA | gene=Tb927.3.4630 | organism=Trypanosoma_brucei_brucei_TREU927 | gene_product=UDP-glucose:glycoprotein glucosyltransferase, putative | transcript_product=UDP-glucose:glycoprotein glucosyltransferase, pu	UDP-glucose:glycoprotein glucosyltransferase	Tb927.3.4630	40	40	40	34.9	34.9	34.9	186.84	0	190.58	1647000000	204	37	35	38	37	37	36	36	35	37	35	38	37	37	36	36	35	37	35	38	37	37	36	36	35	1675	1675	32.2	30.9	32.6
	1.02912	0.0935155	-0.187858	0.877908	Tb927.8.1980:mRNA-p1	Tb927.8.1980:mRNA-p1	Tb927.8.1980:mRNA-p1 | transcript=Tb927.8.1980:mRNA | gene=Tb927.8.1980 | organism=Trypanosoma_brucei_brucei_TREU927 | gene_product=Beta propeller protein 1 | transcript_product=Beta propeller protein 1 | location=Tb927_08_v5.1:632487-633920(+) | protein_l	Beta propeller protein 1	Tb927.8.1980	7	7	7	16.6	16.6	16.6	53.365	0	18.146	184680000	37	4	7	6	4	5	3	4	7	4	7	6	4	5	3	4	7	4	7	6	4	5	3	4	7	477	477	10.1	16.6	14.5
	1.0283	0.0936914	-0.166402	0.891062	Tb927.10.5370:mRNA-p1;Tb927.10.5360:mRNA-p1	Tb927.10.5370:mRNA-p1;Tb927.10.5360:mRNA-p1	Tb927.10.5370:mRNA-p1 | transcript=Tb927.10.5370:mRNA | gene=Tb927.10.5370 | organism=Trypanosoma_brucei_brucei_TREU927 | gene_product=40S ribosomal protein S10, putative | transcript_product=40S ribosomal protein S10, putative | location=Tb927_10_v5.1:134	40S ribosomal protein S10	Tb927.10.5370	8	8	8	44.8	44.8	44.8	19.285	0	31.764	10077000000	116	8	8	8	8	8	8	8	8	8	8	8	8	8	8	8	8	8	8	8	8	8	8	8	8	172	NaN	44.8	44.8	44.8
	1.02826	0.0937007	-0.070004	0.952635	Tb11.v5.0718.1-p1;Tb927.10.13780:mRNA-p1;Tb927.7.2420:mRNA-p1	Tb11.v5.0718.1-p1;Tb927.10.13780:mRNA-p1	Tb11.v5.0718.1-p1 | transcript=Tb11.v5.0718.1 | gene=Tb11.v5.0718 | organism=Trypanosoma_brucei_brucei_TREU927 | gene_product=protein kinase, putative | transcript_product=protein kinase, putative | location=Tb927_11_bin_v5.1:3660115-3661173(+) | protein_l	protein kinase	Tb11.v5.0718	17	17	17	56.8	56.8	56.8	40.32	0	106.6	5412500000	186	16	16	17	16	16	17	16	17	16	16	17	16	16	17	16	17	16	16	17	16	16	17	16	17	352	NaN	53.1	53.1	56.8
	1.0236	0.0947116	0.0663948	1.0471	Tb927.7.2500:mRNA-p1	Tb927.7.2500:mRNA-p1	Tb927.7.2500:mRNA-p1 | transcript=Tb927.7.2500:mRNA | gene=Tb927.7.2500 | organism=Trypanosoma_brucei_brucei_TREU927 | gene_product=proteasome regulatory ATPase subunit 1 | transcript_product=proteasome regulatory ATPase subunit 1 | location=Tb927_07_v5.1:	proteasome regulatory ATPase subunit 1	Tb927.7.2500	18	16	16	45.1	42.3	42.3	48.475	0	47.917	704510000	79	16	17	17	15	16	16	16	18	14	15	15	13	14	14	14	16	14	15	15	13	14	14	14	16	437	437	40.5	43.2	42.3
	1.02214	0.0950294	0.214677	1.16044	Tb927.9.5260:mRNA-p1	Tb927.9.5260:mRNA-p1	Tb927.9.5260:mRNA-p1 | transcript=Tb927.9.5260:mRNA | gene=Tb927.9.5260 | organism=Trypanosoma_brucei_brucei_TREU927 | gene_product=ERAD-associated E3 ubiquitin-protein ligase HRD1, putative | transcript_product=ERAD-associated E3 ubiquitin-protein ligase	ERAD-associated E3 ubiquitin-protein ligase HRD1	Tb927.9.5260	4	4	4	8.2	8.2	8.2	54.871	0	4.4428	40484000	8	4	4	4	3	2	3	3	4	4	4	4	3	2	3	3	4	4	4	4	3	2	3	3	4	488	488	8.2	8.2	8.2
	1.0213	0.0952134	-0.298889	0.812878	Tb927.5.4450:mRNA-p1;Tb05.5K5.100:mRNA-p1	Tb927.5.4450:mRNA-p1;Tb05.5K5.100:mRNA-p1	Tb927.5.4450:mRNA-p1 | transcript=Tb927.5.4450:mRNA | gene=Tb927.5.4450 | organism=Trypanosoma_brucei_brucei_TREU927 | gene_product=hypothetical protein, conserved | transcript_product=hypothetical protein, conserved | location=Tb927_05_v5.1:1372470-137297	hypothetical protein	Tb927.5.4450	3	3	3	21.9	21.9	21.9	18.603	0	7.812	53473000	14	1	2	2	3	2	2	3	2	1	2	2	3	2	2	3	2	1	2	2	3	2	2	3	2	169	NaN	11.2	17.2	17.2
	1.02073	0.0953382	-0.386603	0.764929	Tb927.7.6650:mRNA-p1	Tb927.7.6650:mRNA-p1	Tb927.7.6650:mRNA-p1 | transcript=Tb927.7.6650:mRNA | gene=Tb927.7.6650 | organism=Trypanosoma_brucei_brucei_TREU927 | gene_product=Colon cancer-associated protein Mic1-like, putative | transcript_product=Colon cancer-associated protein Mic1-like, putative	Colon cancer-associated protein Mic1-like	Tb927.7.6650	7	7	7	11.1	11.1	11.1	118.42	0	9.618	69492000	6	4	5	5	5	4	5	2	5	4	5	5	5	4	5	2	5	4	5	5	5	4	5	2	5	1069	1069	7.1	7.1	7.1
	1.01452	0.0967125	0.156768	1.11479	Tb927.2.5910:mRNA-p1;Tb927.10.15120:mRNA-p1	Tb927.2.5910:mRNA-p1;Tb927.10.15120:mRNA-p1	Tb927.2.5910:mRNA-p1 | transcript=Tb927.2.5910:mRNA | gene=Tb927.2.5910 | organism=Trypanosoma_brucei_brucei_TREU927 | gene_product=40S ribosomal protein S13, putative | transcript_product=40S ribosomal protein S13, putative | location=Tb927_02_v5.1:107704	40S ribosomal protein S13	Tb927.2.5910	7	7	7	41.1	41.1	41.1	17.309	0	16.015	2783100000	89	7	7	7	7	7	7	7	7	7	7	7	7	7	7	7	7	7	7	7	7	7	7	7	7	151	NaN	41.1	41.1	41.1
	1.01331	0.0969822	0.436897	1.35369	Tb927.7.1280:mRNA-p1;Tb927.7.1260:mRNA-p1	Tb927.7.1280:mRNA-p1;Tb927.7.1260:mRNA-p1	Tb927.7.1280:mRNA-p1 | transcript=Tb927.7.1280:mRNA | gene=Tb927.7.1280 | organism=Trypanosoma_brucei_brucei_TREU927 | gene_product=hypothetical protein, conserved | transcript_product=hypothetical protein, conserved | location=Tb927_07_v5.1:331746-332447(	hypothetical protein	Tb927.7.1280	1	1	1	11.6	11.6	11.6	26.047	0	4.161	32204000	8	1	1	1	1	1	1	1	1	1	1	1	1	1	1	1	1	1	1	1	1	1	1	1	1	233	NaN	11.6	11.6	11.6
	1.01294	0.0970634	0.105869	1.07614	Tb927.8.5460:mRNA-p1;Tb11.v5.0797.1-p1;Tb927.8.5465:mRNA-p1;Tb11.v5.0798.1-p1;Tb927.8.5440:mRNA-p1;Tb927.8.5470:mRNA-p1	Tb927.8.5460:mRNA-p1;Tb11.v5.0797.1-p1;Tb927.8.5465:mRNA-p1;Tb11.v5.0798.1-p1;Tb927.8.5440:mRNA-p1	Tb927.8.5460:mRNA-p1 | transcript=Tb927.8.5460:mRNA | gene=Tb927.8.5460 | organism=Trypanosoma_brucei_brucei_TREU927 | gene_product=Flagellar calcium-binding 44 kDa protein | transcript_product=Flagellar calcium-binding 44 kDa protein | location=Tb927_08_v	Flagellar calcium-binding 44 kDa protein	Tb927.8.5460	9	9	9	28.3	28.3	28.3	45.718	0	135.97	9803900000	99	9	9	9	9	9	9	9	9	9	9	9	9	9	9	9	9	9	9	9	9	9	9	9	9	407	NaN	28.3	28.3	28.3
	1.01264	0.0971318	-0.118749	0.920986	Tb927.11.12480:mRNA-p1	Tb927.11.12480:mRNA-p1	Tb927.11.12480:mRNA-p1 | transcript=Tb927.11.12480:mRNA | gene=Tb927.11.12480 | organism=Trypanosoma_brucei_brucei_TREU927 | gene_product=Kinetochore interacting phosphatase 7 | transcript_product=Kinetochore interacting phosphatase 7 | location=Tb927_11_v	Kinetochore interacting phosphatase 7	Tb927.11.12480	13	13	13	26.1	26.1	26.1	69.817	0	32.079	355140000	74	13	12	13	12	12	13	12	12	13	12	13	12	12	13	12	12	13	12	13	12	12	13	12	12	637	637	26.1	24.5	26.1
	1.01112	0.0974718	-0.314007	0.804404	Tb927.11.16930:mRNA-p1	Tb927.11.16930:mRNA-p1	Tb927.11.16930:mRNA-p1 | transcript=Tb927.11.16930:mRNA | gene=Tb927.11.16930 | organism=Trypanosoma_brucei_brucei_TREU927 | gene_product=ABC transporter of the mitochondrion, putative | transcript_product=ABC transporter of the mitochondrion, putative | l	ABC transporter of the mitochondrion	Tb927.11.16930	3	3	3	7.5	7.5	7.5	79.103	0	6.3917	15334000	7	1	1	1	1	2	2	2	1	1	1	1	1	2	2	2	1	1	1	1	1	2	2	2	1	719	719	3.1	3.1	3.1
	1.01008	0.0977065	0.344078	1.26934	Tb927.5.2400:mRNA-p1	Tb927.5.2400:mRNA-p1	Tb927.5.2400:mRNA-p1 | transcript=Tb927.5.2400:mRNA | gene=Tb927.5.2400 | organism=Trypanosoma_brucei_brucei_TREU927 | gene_product=Peptidase C19, ubiquitin carboxyl-terminal hydrolase, putative | transcript_product=Peptidase C19, ubiquitin carboxyl-termin	Peptidase C19	Tb927.5.2400	5	5	5	7.4	7.4	7.4	108.26	0	5.7715	42247000	14	4	5	4	2	5	5	2	4	4	5	4	2	5	5	2	4	4	5	4	2	5	5	2	4	986	986	5.9	7.4	5.8
	1.00748	0.0982915	0.284677	1.21814	Tb927.10.14220:mRNA-p1	Tb927.10.14220:mRNA-p1	Tb927.10.14220:mRNA-p1 | transcript=Tb927.10.14220:mRNA | gene=Tb927.10.14220 | organism=Trypanosoma_brucei_brucei_TREU927 | gene_product=hypothetical protein, conserved | transcript_product=hypothetical protein, conserved | location=Tb927_10_v5.1:3450150-	hypothetical protein	Tb927.10.14220	6	6	6	20.8	20.8	20.8	40.348	0	8.8586	1569700000	10	5	6	5	5	4	5	5	6	5	6	5	5	4	5	5	6	5	6	5	5	4	5	5	6	341	341	18.5	20.8	18.5
	1.0065	0.0985145	-0.147038	0.903103	Tb927.8.6770:mRNA-p1	Tb927.8.6770:mRNA-p1	Tb927.8.6770:mRNA-p1 | transcript=Tb927.8.6770:mRNA | gene=Tb927.8.6770 | organism=Trypanosoma_brucei_brucei_TREU927 | gene_product=WD domain, G-beta repeat, putative | transcript_product=WD domain, G-beta repeat, putative | location=Tb927_08_v5.1:1956199-	WD domain	Tb927.8.6770	3	3	3	16.9	16.9	16.9	45.761	0	5.9055	81908000	14	3	2	3	3	3	3	2	2	3	2	3	3	3	3	2	2	3	2	3	3	3	3	2	2	419	419	16.9	12.4	16.9
	1.00627	0.0985658	0.140282	1.10212	Tb927.7.2790:mRNA-p1	Tb927.7.2790:mRNA-p1	Tb927.7.2790:mRNA-p1 | transcript=Tb927.7.2790:mRNA | gene=Tb927.7.2790 | organism=Trypanosoma_brucei_brucei_TREU927 | gene_product=Component of motile flagella 10 | transcript_product=Component of motile flagella 10 | location=Tb927_07_v5.1:723558-725663(	Component of motile flagella 10	Tb927.7.2790	11	11	11	21.4	21.4	21.4	79.302	0	41.36	304280000	38	9	8	8	9	5	8	8	8	9	8	8	9	5	8	8	8	9	8	8	9	5	8	8	8	701	701	18.4	16.8	15.4
	1.0058	0.0986732	0.210526	1.15711	Tb927.10.9360:mRNA-p1	Tb927.10.9360:mRNA-p1	Tb927.10.9360:mRNA-p1 | transcript=Tb927.10.9360:mRNA | gene=Tb927.10.9360 | organism=Trypanosoma_brucei_brucei_TREU927 | gene_product=L-2-hydroxyglutarate dehydrogenase, mitochondrial, putative | transcript_product=L-2-hydroxyglutarate dehydrogenase, mito	L-2-hydroxyglutarate dehydrogenase	Tb927.10.9360	11	11	11	30.2	30.2	30.2	57.475	0	37.837	404620000	51	10	9	11	10	9	10	10	8	10	9	11	10	9	10	10	8	10	9	11	10	9	10	10	8	520	520	27.9	25.4	30.2
	1.00404	0.0990743	-0.13315	0.911839	Tb927.8.6900:mRNA-p1	Tb927.8.6900:mRNA-p1	Tb927.8.6900:mRNA-p1 | transcript=Tb927.8.6900:mRNA | gene=Tb927.8.6900 | organism=Trypanosoma_brucei_brucei_TREU927 | gene_product=transport protein particle (TRAPP) component, putative | transcript_product=transport protein particle (TRAPP) component, pu	transport protein particle (TRAPP) component	Tb927.8.6900	8	8	8	45	45	45	23.536	0	19.714	221980000	36	8	8	6	8	8	8	7	8	8	8	6	8	8	8	7	8	8	8	6	8	8	8	7	8	211	211	45	45	32.2
	1.00312	0.0992843	0.0803976	1.05731	Tb927.3.1110:mRNA-p1;Tb11.v5.0589.1-p1	Tb927.3.1110:mRNA-p1;Tb11.v5.0589.1-p1	Tb927.3.1110:mRNA-p1 | transcript=Tb927.3.1110:mRNA | gene=Tb927.3.1110 | organism=Trypanosoma_brucei_brucei_TREU927 | gene_product=Putative intraflagellar transport protein A1 | transcript_product=Putative intraflagellar transport protein A1 | location=Tb	Putative intraflagellar transport protein A1	Tb927.3.1110	20	20	20	51.4	51.4	51.4	52.713	0	156.85	2125200000	151	18	18	19	20	17	19	19	18	18	18	19	20	17	19	19	18	18	18	19	20	17	19	19	18	477	NaN	51.2	51.2	51.2
	1.00051	0.0998824	-0.0574207	0.960981	Tb927.10.12710:mRNA-p1	Tb927.10.12710:mRNA-p1	Tb927.10.12710:mRNA-p1 | transcript=Tb927.10.12710:mRNA | gene=Tb927.10.12710 | organism=Trypanosoma_brucei_brucei_TREU927 | gene_product=heat shock protein 110, putative | transcript_product=heat shock protein 110, putative | location=Tb927_10_v5.1:308559	heat shock protein 110	Tb927.10.12710	46	46	46	67.2	67.2	67.2	90.863	0	323.31	25038000000	629	46	44	46	44	45	45	44	45	46	44	46	44	45	45	44	45	46	44	46	44	45	45	44	45	811	811	67.2	61.2	67.2
	0.999073	0.100214	-0.236643	0.848718	Tb927.9.3650:mRNA-p1	Tb927.9.3650:mRNA-p1	Tb927.9.3650:mRNA-p1 | transcript=Tb927.9.3650:mRNA | gene=Tb927.9.3650 | organism=Trypanosoma_brucei_brucei_TREU927 | gene_product=Kinesin-13 1 | transcript_product=Kinesin-13 1 | location=Tb927_09_v5.1:730832-732907(+) | protein_length=691 | sequence_SO=	Kinesin-13 1	Tb927.9.3650	6	5	5	12.4	10.9	10.9	77.434	0	8.3247	74128000	13	5	5	4	5	5	5	5	4	4	4	4	4	4	4	4	4	4	4	4	4	4	4	4	4	691	691	11.4	11.4	9
	0.999037	0.100222	-0.247784	0.842189	Tb927.5.4320:mRNA-p1	Tb927.5.4320:mRNA-p1	Tb927.5.4320:mRNA-p1 | transcript=Tb927.5.4320:mRNA | gene=Tb927.5.4320 | organism=Trypanosoma_brucei_brucei_TREU927 | gene_product=Pre-mRNA polyadenylation factor FIP1 | transcript_product=Pre-mRNA polyadenylation factor FIP1 | location=Tb927_05_v5.1:1347	Pre-mRNA polyadenylation factor FIP1	Tb927.5.4320	4	4	4	19.6	19.6	19.6	31.036	0	18.739	141380000	18	3	4	3	3	3	3	1	3	3	4	3	3	3	3	1	3	3	4	3	3	3	3	1	3	280	280	15.7	19.6	15.7
	0.998252	0.100403	0.120664	1.08724	Tb927.4.2130:mRNA-p1	Tb927.4.2130:mRNA-p1	Tb927.4.2130:mRNA-p1 | transcript=Tb927.4.2130:mRNA | gene=Tb927.4.2130 | organism=Trypanosoma_brucei_brucei_TREU927 | gene_product=hypothetical protein, conserved | transcript_product=hypothetical protein, conserved | location=Tb927_04_v5.1:552094-553050(	hypothetical protein	Tb927.4.2130	1	1	1	6.6	6.6	6.6	34.796	0.007791	1.2116	13990000	2	1	1	1	1	1	1	1	1	1	1	1	1	1	1	1	1	1	1	1	1	1	1	1	1	318	318	6.6	6.6	6.6
	0.996263	0.100864	-0.0470629	0.967905	Tb927.11.14130:mRNA-p1;Tb927.10.3840:mRNA-p1	Tb927.11.14130:mRNA-p1;Tb927.10.3840:mRNA-p1	Tb927.11.14130:mRNA-p1 | transcript=Tb927.11.14130:mRNA | gene=Tb927.11.14130 | organism=Trypanosoma_brucei_brucei_TREU927 | gene_product=ribosomal protein L18, putative | transcript_product=ribosomal protein L18, putative | location=Tb927_11_v5.1:3745050-	ribosomal protein L18	Tb927.11.14130	11	11	11	59.8	59.8	59.8	20.904	0	49.863	13983000000	105	11	10	10	11	11	11	11	11	11	10	10	11	11	11	11	11	11	10	10	11	11	11	11	11	179	NaN	59.8	59.8	59.8
	0.995657	0.101005	-0.091465	0.938569	Tb927.10.7570:mRNA-p1;Tb11.v5.0774.1-p1	Tb927.10.7570:mRNA-p1;Tb11.v5.0774.1-p1	Tb927.10.7570:mRNA-p1 | transcript=Tb927.10.7570:mRNA | gene=Tb927.10.7570 | organism=Trypanosoma_brucei_brucei_TREU927 | gene_product=dihydrolipoamide acetyltransferase E2 subunit, putative | transcript_product=dihydrolipoamide acetyltransferase E2 subuni	dihydrolipoamide acetyltransferase E2 subunit	Tb927.10.7570	13	13	13	41.9	41.9	41.9	48.107	0	101.58	1758800000	121	11	13	12	12	12	13	12	12	11	13	12	12	12	13	12	12	11	13	12	12	12	13	12	12	451	NaN	33.9	41.9	35.7
	0.995607	0.101017	0.220906	1.16547	Tb927.10.1860:mRNA-p1	Tb927.10.1860:mRNA-p1	Tb927.10.1860:mRNA-p1 | transcript=Tb927.10.1860:mRNA | gene=Tb927.10.1860 | organism=Trypanosoma_brucei_brucei_TREU927 | gene_product=hypothetical protein, conserved | transcript_product=hypothetical protein, conserved | location=Tb927_10_v5.1:484268-4853	hypothetical protein	Tb927.10.1860	4	4	4	16.4	16.4	16.4	39.134	0	12.513	91118000	16	2	3	2	3	2	3	4	3	2	3	2	3	2	3	4	3	2	3	2	3	2	3	4	3	360	360	8.6	11.9	8.6
	0.99238	0.10177	0.100291	1.07199	Tb927.9.11230:mRNA-p1	Tb927.9.11230:mRNA-p1	Tb927.9.11230:mRNA-p1 | transcript=Tb927.9.11230:mRNA | gene=Tb927.9.11230 | organism=Trypanosoma_brucei_brucei_TREU927 | gene_product=calmodulin-like protein, putative | transcript_product=calmodulin-like protein, putative | location=Tb927_09_v5.1:1776292	calmodulin-like protein	Tb927.9.11230	8	8	8	74.5	74.5	74.5	15.86	0	60.179	1221400000	81	8	8	7	8	8	8	8	8	8	8	7	8	8	8	8	8	8	8	7	8	8	8	8	8	141	141	74.5	74.5	68.8
	0.99107	0.102077	-0.142259	0.906099	Tb927.5.1580:mRNA-p1	Tb927.5.1580:mRNA-p1	Tb927.5.1580:mRNA-p1 | transcript=Tb927.5.1580:mRNA | gene=Tb927.5.1580 | organism=Trypanosoma_brucei_brucei_TREU927 | gene_product=zinc finger CCCH domain containing protein 13 | transcript_product=zinc finger CCCH domain containing protein 13 | location=	zinc finger CCCH domain containing protein 13	Tb927.5.1580	8	8	8	25.1	25.1	25.1	60.305	0	44.477	244140000	52	8	8	8	8	8	8	8	8	8	8	8	8	8	8	8	8	8	8	8	8	8	8	8	8	566	566	25.1	25.1	25.1
	0.989854	0.102364	-0.134988	0.910678	Tb927.10.9890:mRNA-p1;Tb11.v5.0458.1-p1	Tb927.10.9890:mRNA-p1	Tb927.10.9890:mRNA-p1 | transcript=Tb927.10.9890:mRNA | gene=Tb927.10.9890 | organism=Trypanosoma_brucei_brucei_TREU927 | gene_product=hypothetical protein, conserved | transcript_product=hypothetical protein, conserved | location=Tb927_10_v5.1:2442363-244	hypothetical protein	Tb927.10.9890	23	23	23	38.5	38.5	38.5	97.192	0	61.406	1066000000	121	21	23	21	21	21	23	21	22	21	23	21	21	21	23	21	22	21	23	21	21	21	23	21	22	871	NaN	34.6	38.5	35.4
	0.989701	0.1024	-0.310348	0.806447	Tb927.10.7520:mRNA-p1	Tb927.10.7520:mRNA-p1	Tb927.10.7520:mRNA-p1 | transcript=Tb927.10.7520:mRNA | gene=Tb927.10.7520 | organism=Trypanosoma_brucei_brucei_TREU927 | gene_product=folylpolyglutamate synthase, putative | transcript_product=folylpolyglutamate synthase, putative | location=Tb927_10_v5.1	folylpolyglutamate synthase	Tb927.10.7520	1	1	1	2.8	2.8	2.8	54.676	0.0023838	1.7559	12536000	3	1	1	1	1	1	1	1	1	1	1	1	1	1	1	1	1	1	1	1	1	1	1	1	1	500	500	2.8	2.8	2.8
	0.987235	0.102983	-0.114339	0.923805	Tb927.7.4770:mRNA-p1;Tb11.v5.0160.1-p1	Tb927.7.4770:mRNA-p1;Tb11.v5.0160.1-p1	Tb927.7.4770:mRNA-p1 | transcript=Tb927.7.4770:mRNA | gene=Tb927.7.4770 | organism=Trypanosoma_brucei_brucei_TREU927 | gene_product=cyclophilin-type peptidyl-prolyl cis-trans isomerase, putative | transcript_product=cyclophilin-type peptidyl-prolyl cis-tra	cyclophilin-type peptidyl-prolyl cis-trans isomerase	Tb927.7.4770	8	8	8	58.1	58.1	58.1	21.225	0	94.507	8380500000	151	8	8	8	8	8	8	8	8	8	8	8	8	8	8	8	8	8	8	8	8	8	8	8	8	198	NaN	58.1	58.1	58.1
	0.985688	0.10335	0.353277	1.27746	Tb927.10.13610:mRNA-p1	Tb927.10.13610:mRNA-p1	Tb927.10.13610:mRNA-p1 | transcript=Tb927.10.13610:mRNA | gene=Tb927.10.13610 | organism=Trypanosoma_brucei_brucei_TREU927 | gene_product=zinc-finger of a C2HC-type/Double zinc ribbon, putative | transcript_product=zinc-finger of a C2HC-type/Double zinc ri	zinc-finger of a C2HC-type/Double zinc ribbon	Tb927.10.13610	7	7	7	14.8	14.8	14.8	78.791	0	12.298	76707000	31	5	7	5	5	7	5	6	5	5	7	5	5	7	5	6	5	5	7	5	5	7	5	6	5	732	732	9.6	14.8	10.1
	0.985616	0.103368	0.0615602	1.04359	Tb927.7.3740:mRNA-p1	Tb927.7.3740:mRNA-p1	Tb927.7.3740:mRNA-p1 | transcript=Tb927.7.3740:mRNA | gene=Tb927.7.3740 | organism=Trypanosoma_brucei_brucei_TREU927 | gene_product=SUMO-interacting motif-containing protein | transcript_product=SUMO-interacting motif-containing protein | location=Tb927_07	SUMO-interacting motif-containing protein	Tb927.7.3740	40	40	40	58.8	58.8	58.8	93.25	0	279.15	2081400000	273	35	38	38	37	36	35	36	37	35	38	38	37	36	35	36	37	35	38	38	37	36	35	36	37	849	849	51.1	56.3	56.3
	0.98417	0.103712	-0.266675	0.831233	Tb927.3.3630:mRNA-p1	Tb927.3.3630:mRNA-p1	Tb927.3.3630:mRNA-p1 | transcript=Tb927.3.3630:mRNA | gene=Tb927.3.3630 | organism=Trypanosoma_brucei_brucei_TREU927 | gene_product=Elongation factor Ts, mitochondrial, putative | transcript_product=Elongation factor Ts, mitochondrial, putative | location=	Elongation factor Ts	Tb927.3.3630	2	2	2	11.7	11.7	11.7	29.732	0	6.3683	20948000	12	2	2	2	2	2	2	2	2	2	2	2	2	2	2	2	2	2	2	2	2	2	2	2	2	274	274	11.7	11.7	11.7
	0.983715	0.103821	0.205071	1.15274	Tb927.10.5630:mRNA-p1	Tb927.10.5630:mRNA-p1	Tb927.10.5630:mRNA-p1 | transcript=Tb927.10.5630:mRNA | gene=Tb927.10.5630 | organism=Trypanosoma_brucei_brucei_TREU927 | gene_product=hypothetical protein, conserved | transcript_product=hypothetical protein, conserved | location=Tb927_10_v5.1:1406244-140	hypothetical protein	Tb927.10.5630	8	8	8	41.6	41.6	41.6	21.709	0	22.767	322060000	39	7	7	7	7	5	7	6	7	7	7	7	7	5	7	6	7	7	7	7	7	5	7	6	7	185	185	40.5	37.3	37.3
	0.982227	0.104177	1.01388	2.01934	Tb927.9.400:pseudogenic_transcript-p1	Tb927.9.400:pseudogenic_transcript-p1	Tb927.9.400:pseudogenic_transcript-p1 | transcript=Tb927.9.400:pseudogenic_transcript | gene=Tb927.9.400 | organism=Trypanosoma_brucei_brucei_TREU927 | gene_product=variant surface glycoprotein (VSG, pseudogene), putative | transcript_product=variant surfa	variant surface glycoprotein (VSG	Tb927.9.400	1	1	1	1.7	1.7	1.7	55.637	0.0059949	1.2968	31305000	6	1	1	1	0	1	1	1	1	1	1	1	0	1	1	1	1	1	1	1	0	1	1	1	1	524	524	1.7	1.7	1.7
	0.982029	0.104225	-0.216204	0.860828	Tb927.11.6670:mRNA-p1	Tb927.11.6670:mRNA-p1	Tb927.11.6670:mRNA-p1 | transcript=Tb927.11.6670:mRNA | gene=Tb927.11.6670 | organism=Trypanosoma_brucei_brucei_TREU927 | gene_product=hypothetical protein, conserved | transcript_product=hypothetical protein, conserved | location=Tb927_11_v5.1:1883708-188	hypothetical protein	Tb927.11.6670	2	2	2	5.1	5.1	5.1	67.712	0	3.0764	20980000	2	2	1	2	1	1	1	2	1	2	1	2	1	1	1	2	1	2	1	2	1	1	1	2	1	604	604	5.1	2.5	5.1
	0.979621	0.104804	-1.48002	0.358483	Tb927.7.6080:mRNA-p1;Tb927.7.6070:mRNA-p1;Tb927.7.6040:mRNA-p1;Tb927.7.6060:mRNA-p1;Tb927.7.6050:mRNA-p1	Tb927.7.6080:mRNA-p1;Tb927.7.6070:mRNA-p1;Tb927.7.6040:mRNA-p1;Tb927.7.6060:mRNA-p1;Tb927.7.6050:mRNA-p1	Tb927.7.6080:mRNA-p1 | transcript=Tb927.7.6080:mRNA | gene=Tb927.7.6080 | organism=Trypanosoma_brucei_brucei_TREU927 | gene_product=receptor-type adenylate cyclase GRESAG 4, putative | transcript_product=receptor-type adenylate cyclase GRESAG 4, putative |	receptor-type adenylate cyclase GRESAG 4	Tb927.7.6080	3	2	2	3.6	2.6	2.6	129.12	0	9.2621	25422000	6	1	3	2	3	2	3	2	2	1	2	1	2	1	2	1	1	1	2	1	2	1	2	1	1	1170	NaN	1.5	3.6	2.5
	0.979199	0.104906	-0.166492	0.891007	Tb927.10.2860:mRNA-p1	Tb927.10.2860:mRNA-p1	Tb927.10.2860:mRNA-p1 | transcript=Tb927.10.2860:mRNA | gene=Tb927.10.2860 | organism=Trypanosoma_brucei_brucei_TREU927 | gene_product=POC1 centriolar protein homolog | transcript_product=POC1 centriolar protein homolog | location=Tb927_10_v5.1:729287-7316	POC1 centriolar protein homolog	Tb927.10.2860	12	12	12	23.3	23.3	23.3	84.322	0	39.393	309320000	44	10	8	11	10	8	6	9	9	10	8	11	10	8	6	9	9	10	8	11	10	8	6	9	9	780	780	19.7	14.7	21.5
	0.978113	0.105169	-0.107296	0.928326	Tb927.3.3330:mRNA-p1	Tb927.3.3330:mRNA-p1	Tb927.3.3330:mRNA-p1 | transcript=Tb927.3.3330:mRNA | gene=Tb927.3.3330 | organism=Trypanosoma_brucei_brucei_TREU927 | gene_product=heat shock protein 20, putative | transcript_product=heat shock protein 20, putative | location=Tb927_03_v5.1:853025-853450(	heat shock protein 20	Tb927.3.3330	10	10	10	68.8	68.8	68.8	15.842	0	30.602	1012300000	76	10	10	10	10	10	10	10	10	10	10	10	10	10	10	10	10	10	10	10	10	10	10	10	10	141	141	68.8	68.8	68.8
	0.975464	0.105812	-0.200248	0.870401	Tb927.11.12670:mRNA-p1	Tb927.11.12670:mRNA-p1	Tb927.11.12670:mRNA-p1 | transcript=Tb927.11.12670:mRNA | gene=Tb927.11.12670 | organism=Trypanosoma_brucei_brucei_TREU927 | gene_product=Methyltransferase TYW3, putative | transcript_product=Methyltransferase TYW3, putative | location=Tb927_11_v5.1:339529	Methyltransferase TYW3	Tb927.11.12670	4	4	4	18.5	18.5	18.5	39.203	0	22.631	56176000	13	3	2	4	3	3	4	4	3	3	2	4	3	3	4	4	3	3	2	4	3	3	4	4	3	356	356	15.2	9.6	18.5
	0.974797	0.105975	-0.279994	0.823595	Tb927.8.5530:mRNA-p1	Tb927.8.5530:mRNA-p1	Tb927.8.5530:mRNA-p1 | transcript=Tb927.8.5530:mRNA | gene=Tb927.8.5530 | organism=Trypanosoma_brucei_brucei_TREU927 | gene_product=COP9 signalosome complex subunit 5, putative | transcript_product=COP9 signalosome complex subunit 5, putative | location=Tb	COP9 signalosome complex subunit 5	Tb927.8.5530	3	3	3	14.7	14.7	14.7	43.747	0	12.195	64296000	12	3	3	3	3	3	3	3	3	3	3	3	3	3	3	3	3	3	3	3	3	3	3	3	3	395	395	14.7	14.7	14.7
	0.974736	0.10599	-1.49046	0.3559	Tb927.3.2410:mRNA-p1	Tb927.3.2410:mRNA-p1	Tb927.3.2410:mRNA-p1 | transcript=Tb927.3.2410:mRNA | gene=Tb927.3.2410 | organism=Trypanosoma_brucei_brucei_TREU927 | gene_product=Peroxisome biogenesis factor 10 | transcript_product=Peroxisome biogenesis factor 10 | location=Tb927_03_v5.1:608797-609693(	Peroxisome biogenesis factor 10	Tb927.3.2410	3	3	3	14.4	14.4	14.4	32.979	0	3.4045	45410000	2	2	3	3	3	2	3	3	2	2	3	3	3	2	3	3	2	2	3	3	3	2	3	3	2	298	298	8.4	14.4	14.4
	0.974536	0.106039	-0.0635877	0.956882	Tb927.7.180:mRNA-p1	Tb927.7.180:mRNA-p1	Tb927.7.180:mRNA-p1 | transcript=Tb927.7.180:mRNA | gene=Tb927.7.180 | organism=Trypanosoma_brucei_brucei_TREU927 | gene_product=Trypanosomal VSG domain containing protein, putative | transcript_product=Trypanosomal VSG domain containing protein, putative	Trypanosomal VSG domain containing protein	Tb927.7.180	18	18	18	38.7	38.7	38.7	49.811	0	32.797	798690000	104	18	18	18	18	18	18	17	18	18	18	18	18	18	18	17	18	18	18	18	18	18	18	17	18	437	437	38.7	38.7	38.7
	0.973456	0.106303	-0.0371971	0.974546	Tb927.3.2600:mRNA-p1	Tb927.3.2600:mRNA-p1	Tb927.3.2600:mRNA-p1 | transcript=Tb927.3.2600:mRNA | gene=Tb927.3.2600 | organism=Trypanosoma_brucei_brucei_TREU927 | gene_product=ATP-dependent DEAD/H RNA helicase, putative | transcript_product=ATP-dependent DEAD/H RNA helicase, putative | location=Tb92	ATP-dependent DEAD/H RNA helicase	Tb927.3.2600	87	87	87	55.4	55.4	55.4	244.99	0	323.31	7695900000	566	77	83	80	77	80	80	78	80	77	83	80	77	80	80	78	80	77	83	80	77	80	80	78	80	2170	2170	47.8	52.4	50.3
	0.973122	0.106384	0.0629058	1.04457	Tb927.6.3640:mRNA-p1	Tb927.6.3640:mRNA-p1	Tb927.6.3640:mRNA-p1 | transcript=Tb927.6.3640:mRNA | gene=Tb927.6.3640 | organism=Trypanosoma_brucei_brucei_TREU927 | gene_product=zinc finger of C3HC4-type, RING/B-box zinc finger, putative | transcript_product=zinc finger of C3HC4-type, RING/B-box zinc	zinc finger of C3HC4-type	Tb927.6.3640	14	14	14	33.3	33.3	33.3	62.901	0	46.888	725690000	67	10	13	12	11	11	11	11	12	10	13	12	11	11	11	11	12	10	13	12	11	11	11	11	12	561	561	25.7	31.6	30.1
	0.97125	0.106844	-0.1398	0.907645	Tb927.8.1420:mRNA-p1	Tb927.8.1420:mRNA-p1	Tb927.8.1420:mRNA-p1 | transcript=Tb927.8.1420:mRNA | gene=Tb927.8.1420 | organism=Trypanosoma_brucei_brucei_TREU927 | gene_product=acyl-CoA dehydrogenase, mitochondrial precursor, putative | transcript_product=acyl-CoA dehydrogenase, mitochondrial precurs	acyl-CoA dehydrogenase	Tb927.8.1420	6	6	6	13.5	13.5	13.5	55.982	0	8.9517	113370000	12	5	4	6	4	5	5	4	5	5	4	6	4	5	5	4	5	5	4	6	4	5	5	4	5	519	519	10.4	8.1	13.5
	0.970707	0.106978	-0.0652003	0.955813	Tb927.10.14240:mRNA-p1;Tb11.v5.0859.1-p1	Tb927.10.14240:mRNA-p1;Tb11.v5.0859.1-p1	Tb927.10.14240:mRNA-p1 | transcript=Tb927.10.14240:mRNA | gene=Tb927.10.14240 | organism=Trypanosoma_brucei_brucei_TREU927 | gene_product=N-myristoyltransferase | transcript_product=N-myristoyltransferase | location=Tb927_10_v5.1:3457704-3459044(-) | prote	N-myristoyltransferase	Tb927.10.14240	12	12	12	43.3	43.3	43.3	50.528	0	80.79	1029700000	86	10	12	11	11	12	12	12	12	10	12	11	11	12	12	12	12	10	12	11	11	12	12	12	12	446	NaN	36.3	43.3	40.1
	0.96983	0.107194	0.116508	1.08411	Tb927.3.3780:mRNA-p1;Tb927.3.3760:mRNA-p1	Tb927.3.3780:mRNA-p1;Tb927.3.3760:mRNA-p1	Tb927.3.3780:mRNA-p1 | transcript=Tb927.3.3780:mRNA | gene=Tb927.3.3780 | organism=Trypanosoma_brucei_brucei_TREU927 | gene_product=tryparedoxin 1a, putative | transcript_product=tryparedoxin 1a, putative | location=Tb927_03_v5.1:1053583-1054017(+) | prote	tryparedoxin 1a	Tb927.3.3780	7	7	7	65.3	65.3	65.3	15.891	0	51.704	14140000000	148	7	7	7	7	7	7	7	7	7	7	7	7	7	7	7	7	7	7	7	7	7	7	7	7	144	NaN	65.3	65.3	65.3
	0.969589	0.107253	0.220711	1.16531	Tb927.7.4840:mRNA-p1;Tb11.v5.0166.1-p1	Tb927.7.4840:mRNA-p1;Tb11.v5.0166.1-p1	Tb927.7.4840:mRNA-p1 | transcript=Tb927.7.4840:mRNA | gene=Tb927.7.4840 | organism=Trypanosoma_brucei_brucei_TREU927 | gene_product=hypothetical protein, conserved | transcript_product=hypothetical protein, conserved | location=Tb927_07_v5.1:1274020-127502	hypothetical protein	Tb927.7.4840	6	6	6	15.6	15.6	15.6	38.168	0	8.473	116980000	26	4	6	5	6	5	5	4	6	4	6	5	6	5	5	4	6	4	6	5	6	5	5	4	6	334	NaN	10.2	15.6	12.6
	0.968878	0.107429	0.117486	1.08484	Tb927.9.9230:mRNA-p1	Tb927.9.9230:mRNA-p1	Tb927.9.9230:mRNA-p1 | transcript=Tb927.9.9230:mRNA | gene=Tb927.9.9230 | organism=Trypanosoma_brucei_brucei_TREU927 | gene_product=hypothetical protein, conserved | transcript_product=hypothetical protein, conserved | location=Tb927_09_v5.1:1472027-147253	hypothetical protein	Tb927.9.9230	3	3	3	25.4	25.4	25.4	19.876	0	25.988	272660000	23	3	3	3	3	3	3	3	3	3	3	3	3	3	3	3	3	3	3	3	3	3	3	3	3	169	169	25.4	25.4	25.4
	0.967364	0.107804	0.168219	1.12367	Tb927.11.5370:mRNA-p1	Tb927.11.5370:mRNA-p1	Tb927.11.5370:mRNA-p1 | transcript=Tb927.11.5370:mRNA | gene=Tb927.11.5370 | organism=Trypanosoma_brucei_brucei_TREU927 | gene_product=hypothetical protein, conserved | transcript_product=hypothetical protein, conserved | location=Tb927_11_v5.1:1530694-153	hypothetical protein	Tb927.11.5370	11	11	11	18.7	18.7	18.7	76.636	0	24.711	347680000	41	10	11	10	10	10	9	11	10	10	11	10	10	10	9	11	10	10	11	10	10	10	9	11	10	690	690	16.8	18.7	16.8
	0.967082	0.107874	0.0333872	1.02341	Tb927.10.5770:mRNA-p1	Tb927.10.5770:mRNA-p1	Tb927.10.5770:mRNA-p1 | transcript=Tb927.10.5770:mRNA | gene=Tb927.10.5770 | organism=Trypanosoma_brucei_brucei_TREU927 | gene_product=Valosin-containing protein | transcript_product=Valosin-containing protein | location=Tb927_10_v5.1:1430797-1433139(-) |	Valosin-containing protein	Tb927.10.5770	47	47	47	79	79	79	85.825	0	323.31	14297000000	567	47	46	46	47	46	47	47	46	47	46	46	47	46	47	47	46	47	46	46	47	46	47	47	46	780	780	79	77.4	77.4
	0.967046	0.107883	-1.8249	0.28226	Tb927.7.3730:mRNA-p1	Tb927.7.3730:mRNA-p1	Tb927.7.3730:mRNA-p1 | transcript=Tb927.7.3730:mRNA | gene=Tb927.7.3730 | organism=Trypanosoma_brucei_brucei_TREU927 | gene_product=RNA-binding protein, putative | transcript_product=RNA-binding protein, putative | location=Tb927_07_v5.1:976289-977311(-) |	RNA-binding protein	Tb927.7.3730	1	1	1	8.8	8.8	8.8	36.384	0	5.9984	33534000	2	1	1	0	1	0	1	0	1	1	1	0	1	0	1	0	1	1	1	0	1	0	1	0	1	340	340	8.8	8.8	0
	0.966824	0.107939	0.135198	1.09824	Tb927.9.9840:mRNA-p1	Tb927.9.9840:mRNA-p1	Tb927.9.9840:mRNA-p1 | transcript=Tb927.9.9840:mRNA | gene=Tb927.9.9840 | organism=Trypanosoma_brucei_brucei_TREU927 | gene_product=lipoic acid containing carrier protein, putative | transcript_product=lipoic acid containing carrier protein, putative | loc	lipoic acid containing carrier protein	Tb927.9.9840	4	4	4	21.7	21.7	21.7	15.216	0	9.7973	441670000	35	4	3	4	3	4	4	4	4	4	3	4	3	4	4	4	4	4	3	4	3	4	4	4	4	138	138	21.7	21.7	21.7
	0.96081	0.109443	-0.0862961	0.941938	Tb927.5.3030:mRNA-p1	Tb927.5.3030:mRNA-p1	Tb927.5.3030:mRNA-p1 | transcript=Tb927.5.3030:mRNA | gene=Tb927.5.3030 | organism=Trypanosoma_brucei_brucei_TREU927 | gene_product=Intraflagellar transport protein 121 | transcript_product=Intraflagellar transport protein 121 | location=Tb927_05_v5.1:1005	Intraflagellar transport protein 121	Tb927.5.3030	45	45	45	44.7	44.7	44.7	140.63	0	166.14	2859000000	254	42	44	42	39	42	39	41	42	42	44	42	39	42	39	41	42	42	44	42	39	42	39	41	42	1260	1260	41.9	44.6	41.2
	0.960052	0.109635	-0.137322	0.909205	Tb927.7.3530:mRNA-p1	Tb927.7.3530:mRNA-p1	Tb927.7.3530:mRNA-p1 | transcript=Tb927.7.3530:mRNA | gene=Tb927.7.3530 | organism=Trypanosoma_brucei_brucei_TREU927 | gene_product=Vacuolar protein 14 C-terminal Fig4p binding, putative | transcript_product=Vacuolar protein 14 C-terminal Fig4p binding, pu	Vacuolar protein 14 C-terminal Fig4p binding	Tb927.7.3530	2	2	2	2.9	2.9	2.9	77.548	0	3.7767	19030000	10	2	2	2	2	2	2	1	2	2	2	2	2	2	2	1	2	2	2	2	2	2	2	1	2	691	691	2.9	2.9	2.9
	0.958363	0.110062	0.178014	1.13133	Tb927.2.4050:mRNA-p1	Tb927.2.4050:mRNA-p1	Tb927.2.4050:mRNA-p1 | transcript=Tb927.2.4050:mRNA | gene=Tb927.2.4050 | organism=Trypanosoma_brucei_brucei_TREU927 | gene_product=hypothetical protein, conserved | transcript_product=hypothetical protein, conserved | location=Tb927_02_v5.1:710848-714564(	hypothetical protein	Tb927.2.4050	8	8	8	10	10	10	128.98	0	25.563	221670000	37	7	7	7	6	7	6	6	6	7	7	7	6	7	6	6	6	7	7	7	6	7	6	6	6	1238	1238	8.8	8.8	7.8
	0.958201	0.110103	-0.548306	0.683823	Tb927.3.650:mRNA-p1	Tb927.3.650:mRNA-p1	Tb927.3.650:mRNA-p1 | transcript=Tb927.3.650:mRNA | gene=Tb927.3.650 | organism=Trypanosoma_brucei_brucei_TREU927 | gene_product=hypothetical protein, conserved | transcript_product=hypothetical protein, conserved | location=Tb927_03_v5.1:161754-161942(-)	hypothetical protein	Tb927.3.650	1	1	1	38.7	38.7	38.7	6.953	0	3.6109	32382000	3	1	1	1	1	1	1	1	1	1	1	1	1	1	1	1	1	1	1	1	1	1	1	1	1	62	62	38.7	38.7	38.7
	0.958022	0.110148	-0.0599976	0.959266	Tb927.6.2640:mRNA-p1	Tb927.6.2640:mRNA-p1	Tb927.6.2640:mRNA-p1 | transcript=Tb927.6.2640:mRNA | gene=Tb927.6.2640 | organism=Trypanosoma_brucei_brucei_TREU927 | gene_product=importin alpha subunit, putative | transcript_product=importin alpha subunit, putative | location=Tb927_06_v5.1:793568-79516	importin alpha subunit	Tb927.6.2640	20	20	20	61.4	61.4	61.4	58.065	0	175.37	2522700000	191	20	20	19	18	19	18	19	19	20	20	19	18	19	18	19	19	20	20	19	18	19	18	19	19	533	533	61.4	61.4	61.4
	0.957953	0.110166	-0.207245	0.86619	Tb927.7.3750:mRNA-p1	Tb927.7.3750:mRNA-p1	Tb927.7.3750:mRNA-p1 | transcript=Tb927.7.3750:mRNA | gene=Tb927.7.3750 | organism=Trypanosoma_brucei_brucei_TREU927 | gene_product=TFIIF-stimulated CTD phosphatase, putative | transcript_product=TFIIF-stimulated CTD phosphatase, putative | location=Tb927_	TFIIF-stimulated CTD phosphatase	Tb927.7.3750	5	5	5	33.3	33.3	33.3	22.571	0	17.363	178490000	35	5	5	5	5	5	5	5	5	5	5	5	5	5	5	5	5	5	5	5	5	5	5	5	5	198	198	33.3	33.3	33.3
	0.957661	0.11024	-0.13834	0.908564	Tb11.v5.0159.1-p1;Tb927.7.4760:mRNA-p1	Tb11.v5.0159.1-p1;Tb927.7.4760:mRNA-p1	Tb11.v5.0159.1-p1 | transcript=Tb11.v5.0159.1 | gene=Tb11.v5.0159 | organism=Trypanosoma_brucei_brucei_TREU927 | gene_product=hypothetical protein, conserved | transcript_product=hypothetical protein, conserved | location=Tb927_11_bin_v5.1:174499-175980(-)	hypothetical protein	Tb11.v5.0159	9	9	9	28.6	28.6	28.6	53.378	0	36.659	263560000	48	9	9	9	9	8	8	9	9	9	9	9	9	8	8	9	9	9	9	9	9	8	8	9	9	493	NaN	28.6	28.6	28.6
	0.957174	0.110364	-0.309192	0.807094	Tb927.7.740:mRNA-p1	Tb927.7.740:mRNA-p1	Tb927.7.740:mRNA-p1 | transcript=Tb927.7.740:mRNA | gene=Tb927.7.740 | organism=Trypanosoma_brucei_brucei_TREU927 | gene_product=chaperone protein DnaJ, putative | transcript_product=chaperone protein DnaJ, putative | location=Tb927_07_v5.1:167245-168888(-	chaperone protein DnaJ	Tb927.7.740	2	2	2	6.8	6.8	6.8	61.973	0	9.5726	31217000	6	1	1	1	2	1	1	2	1	1	1	1	2	1	1	2	1	1	1	1	2	1	1	2	1	547	547	3.3	3.3	3.3
	0.957128	0.110375	0.307684	1.23772	Tb927.11.5470:mRNA-p1	Tb927.11.5470:mRNA-p1	Tb927.11.5470:mRNA-p1 | transcript=Tb927.11.5470:mRNA | gene=Tb927.11.5470 | organism=Trypanosoma_brucei_brucei_TREU927 | gene_product=hypothetical protein, conserved | transcript_product=hypothetical protein, conserved | location=Tb927_11_v5.1:1554316-155	hypothetical protein	Tb927.11.5470	1	1	1	4.8	4.8	4.8	45.653	0.0051044	1.3647	4175700	2	1	1	1	1	1	1	1	1	1	1	1	1	1	1	1	1	1	1	1	1	1	1	1	1	417	417	4.8	4.8	4.8
	0.956237	0.110602	-0.182107	0.881415	Tb927.7.2450:mRNA-p1	Tb927.7.2450:mRNA-p1	Tb927.7.2450:mRNA-p1 | transcript=Tb927.7.2450:mRNA | gene=Tb927.7.2450 | organism=Trypanosoma_brucei_brucei_TREU927 | gene_product=SUMO-interacting motif-containing protein | transcript_product=SUMO-interacting motif-containing protein | location=Tb927_07	SUMO-interacting motif-containing protein	Tb927.7.2450	7	7	7	19.6	19.6	19.6	54.394	0	16.283	120230000	28	7	6	6	6	6	6	6	6	7	6	6	6	6	6	6	6	7	6	6	6	6	6	6	6	485	485	19.6	17.9	17.9
	0.955181	0.110871	-0.125398	0.916751	Tb927.2.370:mRNA-p1	Tb927.2.370:mRNA-p1	Tb927.2.370:mRNA-p1 | transcript=Tb927.2.370:mRNA | gene=Tb927.2.370 | organism=Trypanosoma_brucei_brucei_TREU927 | gene_product=retrotransposon hot spot protein 1 (RHS1), putative | transcript_product=retrotransposon hot spot protein 1 (RHS1), putative |	retrotransposon hot spot protein 1 (RHS1)	Tb927.2.370	30	2	1	44.2	2.4	1.2	95.139	0	3.5628	85289000	11	28	27	26	27	27	26	27	26	2	2	2	2	2	2	2	2	1	1	1	1	1	1	1	1	834	834	40.2	37.6	37.9
	0.952709	0.111504	0.0899191	1.06431	Tb927.7.3330:mRNA-p1	Tb927.7.3330:mRNA-p1	Tb927.7.3330:mRNA-p1 | transcript=Tb927.7.3330:mRNA | gene=Tb927.7.3330 | organism=Trypanosoma_brucei_brucei_TREU927 | gene_product=Flagellar attachment zone protein 10 | transcript_product=Flagellar attachment zone protein 10 | location=Tb927_07_v5.1:8588	Flagellar attachment zone protein 10	Tb927.7.3330	58	58	58	51	51	51	502.65	0	210.79	10687000000	331	52	50	48	49	49	55	52	53	52	50	48	49	49	55	52	53	52	50	48	49	49	55	52	53	4334	4334	50	49.5	49
	0.952269	0.111617	-0.230563	0.852302	Tb927.7.4670:mRNA-p1;Tb11.v5.0152.1-p1	Tb927.7.4670:mRNA-p1;Tb11.v5.0152.1-p1	Tb927.7.4670:mRNA-p1 | transcript=Tb927.7.4670:mRNA | gene=Tb927.7.4670 | organism=Trypanosoma_brucei_brucei_TREU927 | gene_product=ribosomal RNA processing protein 4 | transcript_product=ribosomal RNA processing protein 4 | location=Tb927_07_v5.1:1237468-	ribosomal RNA processing protein 4	Tb927.7.4670	2	2	2	7.6	7.6	7.6	32.715	0	3.5273	74546000	15	2	2	2	2	2	2	2	2	2	2	2	2	2	2	2	2	2	2	2	2	2	2	2	2	301	NaN	7.6	7.6	7.6
	0.951833	0.111729	-0.116181	0.922627	Tb927.10.11870:mRNA-p1	Tb927.10.11870:mRNA-p1	Tb927.10.11870:mRNA-p1 | transcript=Tb927.10.11870:mRNA | gene=Tb927.10.11870 | organism=Trypanosoma_brucei_brucei_TREU927 | gene_product=Guide RNA binding complex protein 5 | transcript_product=Guide RNA binding complex protein 5 | location=Tb927_10_v5.1:	Guide RNA binding complex protein 5	Tb927.10.11870	7	7	7	36.1	36.1	36.1	34.683	0	15.672	216130000	37	5	6	5	6	6	5	5	6	5	6	5	6	6	5	5	6	5	6	5	6	6	5	5	6	310	310	24.8	32.3	25.8
	0.951355	0.111852	-0.118678	0.921031	Tb927.9.13320:mRNA-p1	Tb927.9.13320:mRNA-p1	Tb927.9.13320:mRNA-p1 | transcript=Tb927.9.13320:mRNA | gene=Tb927.9.13320 | organism=Trypanosoma_brucei_brucei_TREU927 | gene_product=hypothetical protein, conserved | transcript_product=hypothetical protein, conserved | location=Tb927_09_v5.1:2099555-210	hypothetical protein	Tb927.9.13320	10	10	10	25	25	25	55.399	0	31.983	399080000	47	10	10	9	9	9	8	8	10	10	10	9	9	9	8	8	10	10	10	9	9	9	8	8	10	507	507	25	25	23.3
	0.951246	0.111881	-0.143143	0.905544	Tb927.5.1080:mRNA-p1	Tb927.5.1080:mRNA-p1	Tb927.5.1080:mRNA-p1 | transcript=Tb927.5.1080:mRNA | gene=Tb927.5.1080 | organism=Trypanosoma_brucei_brucei_TREU927 | gene_product=RNA-binding protein, putative | transcript_product=RNA-binding protein, putative | location=Tb927_05_v5.1:408066-408779(+) |	RNA-binding protein	Tb927.5.1080	4	4	4	19.8	19.8	19.8	26.869	0	6.3509	85658000	19	4	4	4	4	4	4	4	4	4	4	4	4	4	4	4	4	4	4	4	4	4	4	4	4	237	237	19.8	19.8	19.8
	0.949584	0.112309	0.242245	1.18283	Tb927.3.3290:mRNA-p1;Tb11.v5.0474.1-p1	Tb927.3.3290:mRNA-p1;Tb11.v5.0474.1-p1	Tb927.3.3290:mRNA-p1 | transcript=Tb927.3.3290:mRNA | gene=Tb927.3.3290 | organism=Trypanosoma_brucei_brucei_TREU927 | gene_product=protein kinase, putative | transcript_product=protein kinase, putative | location=Tb927_03_v5.1:845530-846948(-) | protein_l	protein kinase	Tb927.3.3290	3	3	3	7	7	7	52.418	0	3.4281	32626000	8	3	3	3	2	3	3	3	3	3	3	3	2	3	3	3	3	3	3	3	2	3	3	3	3	472	NaN	7	7	7
	0.949099	0.112435	0.214103	1.15998	Tb927.11.4170:mRNA-p1	Tb927.11.4170:mRNA-p1	Tb927.11.4170:mRNA-p1 | transcript=Tb927.11.4170:mRNA | gene=Tb927.11.4170 | organism=Trypanosoma_brucei_brucei_TREU927 | gene_product=kinetoplastid-specific dual specificity phosphatase, putative | transcript_product=kinetoplastid-specific dual specificit	kinetoplastid-specific dual specificity phosphatase	Tb927.11.4170	5	5	5	13.9	13.9	13.9	55.809	0	21.571	92779000	20	5	4	4	3	4	4	4	4	5	4	4	3	4	4	4	4	5	4	4	3	4	4	4	4	509	509	13.9	12.4	12.4
	0.948597	0.112565	-0.146218	0.903616	Tb927.10.5640:mRNA-p1	Tb927.10.5640:mRNA-p1	Tb927.10.5640:mRNA-p1 | transcript=Tb927.10.5640:mRNA | gene=Tb927.10.5640 | organism=Trypanosoma_brucei_brucei_TREU927 | gene_product=Gem-associated protein 2, putative | transcript_product=Gem-associated protein 2, putative | location=Tb927_10_v5.1:14071	Gem-associated protein 2	Tb927.10.5640	4	4	4	12.3	12.3	12.3	55.428	0	3.8567	71197000	18	4	4	4	4	4	4	4	4	4	4	4	4	4	4	4	4	4	4	4	4	4	4	4	4	495	495	12.3	12.3	12.3
	0.94797	0.112727	0.0875044	1.06253	Tb927.7.2400:mRNA-p1	Tb927.7.2400:mRNA-p1	Tb927.7.2400:mRNA-p1 | transcript=Tb927.7.2400:mRNA | gene=Tb927.7.2400 | organism=Trypanosoma_brucei_brucei_TREU927 | gene_product=tyrosyl-tRNA synthetase, putative | transcript_product=tyrosyl-tRNA synthetase, putative | location=Tb927_07_v5.1:617417-618	tyrosyl-tRNA synthetase	Tb927.7.2400	11	11	11	35.8	35.8	35.8	45.797	0	40.539	1135900000	74	10	10	9	8	10	11	10	10	10	10	9	8	10	11	10	10	10	10	9	8	10	11	10	10	425	425	33.9	33.9	25.2
	0.947605	0.112822	-0.279964	0.823612	Tb927.8.1490:mRNA-p1	Tb927.8.1490:mRNA-p1	Tb927.8.1490:mRNA-p1 | transcript=Tb927.8.1490:mRNA | gene=Tb927.8.1490 | organism=Trypanosoma_brucei_brucei_TREU927 | gene_product=Protein of unknown function (DUF1674), putative | transcript_product=Protein of unknown function (DUF1674), putative | locat	Protein of unknown function (DUF1674)	Tb927.8.1490	3	3	3	53.4	53.4	53.4	11.249	0	6.1616	34803000	12	2	2	1	2	3	3	3	2	2	2	1	2	3	3	3	2	2	2	1	2	3	3	3	2	103	103	27.2	27.2	13.6
	0.945331	0.113415	0.208138	1.1552	Tb11.v5.0836.1-p1;Tb927.8.7460:mRNA-p1;Tb927.4.4960:mRNA-p1	Tb11.v5.0836.1-p1;Tb927.8.7460:mRNA-p1;Tb927.4.4960:mRNA-p1	Tb11.v5.0836.1-p1 | transcript=Tb11.v5.0836.1 | gene=Tb11.v5.0836 | organism=Trypanosoma_brucei_brucei_TREU927 | gene_product=metal-ion transporter, putative | transcript_product=metal-ion transporter, putative | location=Tb927_11_bin_v5.1:4367002-4367763(	metal-ion transporter	Tb11.v5.0836	2	2	2	9.1	9.1	9.1	27.298	0.00025208	2.6454	31471000	17	1	1	2	2	1	2	2	1	1	1	2	2	1	2	2	1	1	1	2	2	1	2	2	1	253	NaN	4	4	9.1
	0.941302	0.114472	0.216908	1.16224	Tb927.9.15010:mRNA-p1	Tb927.9.15010:mRNA-p1	Tb927.9.15010:mRNA-p1 | transcript=Tb927.9.15010:mRNA | gene=Tb927.9.15010 | organism=Trypanosoma_brucei_brucei_TREU927 | gene_product=NADH dehydrogenase (ubiquinone) 1 beta subcomplex subunit, putative | transcript_product=NADH dehydrogenase (ubiquinone)	NADH dehydrogenase (ubiquinone) 1 beta subcomplex subunit	Tb927.9.15010	3	3	3	16.2	16.2	16.2	23.182	0	3.9147	56455000	7	3	3	3	3	3	3	3	3	3	3	3	3	3	3	3	3	3	3	3	3	3	3	3	3	204	204	16.2	16.2	16.2
	0.939772	0.114876	-0.176064	0.885114	Tb927.7.1120:mRNA-p1	Tb927.7.1120:mRNA-p1	Tb927.7.1120:mRNA-p1 | transcript=Tb927.7.1120:mRNA | gene=Tb927.7.1120 | organism=Trypanosoma_brucei_brucei_TREU927 | gene_product=trypanothione/tryparedoxin dependent peroxidase 1, cytosolic | transcript_product=trypanothione/tryparedoxin dependent perox	trypanothione/tryparedoxin dependent peroxidase 1	Tb927.7.1120	11	3	3	67.5	28.9	28.9	18.588	0	47.192	694910000	36	11	11	11	11	11	10	11	11	3	3	3	3	3	3	3	3	3	3	3	3	3	3	3	3	166	166	67.5	67.5	67.5
	0.938415	0.115235	0.085073	1.06074	Tb927.10.5450:mRNA-p1	Tb927.10.5450:mRNA-p1	Tb927.10.5450:mRNA-p1 | transcript=Tb927.10.5450:mRNA | gene=Tb927.10.5450 | organism=Trypanosoma_brucei_brucei_TREU927 | gene_product=ISWI complex protein | transcript_product=ISWI complex protein | location=Tb927_10_v5.1:1370851-1373724(+) | protein_leng	ISWI complex protein	Tb927.10.5450	21	21	21	27.7	27.7	27.7	107.29	0	83.779	941040000	130	20	21	20	19	20	21	21	20	20	21	20	19	20	21	21	20	20	21	20	19	20	21	21	20	957	957	25.6	27.7	27.7
	0.937243	0.115546	0.170309	1.1253	Tb927.11.11710:mRNA-p1	Tb927.11.11710:mRNA-p1	Tb927.11.11710:mRNA-p1 | transcript=Tb927.11.11710:mRNA | gene=Tb927.11.11710 | organism=Trypanosoma_brucei_brucei_TREU927 | gene_product=Putative serine esterase (DUF676), putative | transcript_product=Putative serine esterase (DUF676), putative | locatio	Putative serine esterase (DUF676)	Tb927.11.11710	6	6	6	19.6	19.6	19.6	38.7	0	12.501	99821000	26	6	4	6	5	5	5	6	5	6	4	6	5	5	5	6	5	6	4	6	5	5	5	6	5	341	341	19.6	15.2	19.6
	0.936665	0.1157	-0.236983	0.848518	Tb927.10.12860:mRNA-p1	Tb927.10.12860:mRNA-p1	Tb927.10.12860:mRNA-p1 | transcript=Tb927.10.12860:mRNA | gene=Tb927.10.12860 | organism=Trypanosoma_brucei_brucei_TREU927 | gene_product=pre-RNA processing PIH1/Nop17, putative | transcript_product=pre-RNA processing PIH1/Nop17, putative | location=Tb927_	pre-RNA processing PIH1/Nop17	Tb927.10.12860	12	12	12	23.9	23.9	23.9	77.741	0	13.612	196230000	32	9	10	8	9	11	8	10	10	9	10	8	9	11	8	10	10	9	10	8	9	11	8	10	10	694	694	18.6	19.9	14.1
	0.936059	0.115862	0.0795655	1.0567	Tb927.11.2770:mRNA-p1	Tb927.11.2770:mRNA-p1	Tb927.11.2770:mRNA-p1 | transcript=Tb927.11.2770:mRNA | gene=Tb927.11.2770 | organism=Trypanosoma_brucei_brucei_TREU927 | gene_product=hypothetical protein, conserved | transcript_product=hypothetical protein, conserved | location=Tb927_11_v5.1:810672-8114	hypothetical protein	Tb927.11.2770	10	10	10	47.4	47.4	47.4	31.598	0	52.487	400230000	59	9	9	9	9	8	10	10	9	9	9	9	9	8	10	10	9	9	9	9	9	8	10	10	9	270	270	43.7	44.8	43.7
	0.935925	0.115898	0.104671	1.07525	Tb927.4.5200:mRNA-p1	Tb927.4.5200:mRNA-p1	Tb927.4.5200:mRNA-p1 | transcript=Tb927.4.5200:mRNA | gene=Tb927.4.5200 | organism=Trypanosoma_brucei_brucei_TREU927 | gene_product=Nucleoporin NUP62 | transcript_product=Nucleoporin NUP62 | location=Tb927_04_v5.1:1418433-1420358(-) | protein_length=641 |	Nucleoporin NUP62	Tb927.4.5200	9	9	9	18.1	18.1	18.1	62.475	0	36.144	326300000	60	9	9	8	9	9	9	8	8	9	9	8	9	9	9	8	8	9	9	8	9	9	9	8	8	641	641	18.1	18.1	15.4
	0.934091	0.116388	-0.140847	0.906987	Tb927.2.4830:mRNA-p1	Tb927.2.4830:mRNA-p1	Tb927.2.4830:mRNA-p1 | transcript=Tb927.2.4830:mRNA | gene=Tb927.2.4830 | organism=Trypanosoma_brucei_brucei_TREU927 | gene_product=TFIIF-stimulated CTD phosphatase, putative | transcript_product=TFIIF-stimulated CTD phosphatase, putative | location=Tb927_	TFIIF-stimulated CTD phosphatase	Tb927.2.4830	7	7	7	22	22	22	38.807	0	7.4409	130830000	28	7	6	6	5	5	6	7	7	7	6	6	5	5	6	7	7	7	6	6	5	5	6	7	7	336	336	22	19.9	19.9
	0.933954	0.116425	0.0796623	1.05677	Tb927.7.4070:mRNA-p1	Tb927.7.4070:mRNA-p1	Tb927.7.4070:mRNA-p1 | transcript=Tb927.7.4070:mRNA | gene=Tb927.7.4070 | organism=Trypanosoma_brucei_brucei_TREU927 | gene_product=cysteine peptidase, Clan CA, family C2, putative | transcript_product=cysteine peptidase, Clan CA, family C2, putative | loc	cysteine peptidase	Tb927.7.4070	11	11	3	83.3	83.3	30.8	13.518	0	49.039	6437300000	104	11	11	11	11	11	11	11	10	11	11	11	11	11	11	11	10	3	3	3	3	3	3	3	3	120	120	83.3	83.3	83.3
	0.932159	0.116907	0.147351	1.10753	Tb927.1.670:mRNA-p1	Tb927.1.670:mRNA-p1	Tb927.1.670:mRNA-p1 | transcript=Tb927.1.670:mRNA | gene=Tb927.1.670 | organism=Trypanosoma_brucei_brucei_TREU927 | gene_product=conserved protein, unknown function | transcript_product=conserved protein, unknown function | location=Tb927_01_v5.1:228043-22	conserved protein	Tb927.1.670	10	10	10	19.9	19.9	19.9	65.781	0	38.325	251940000	56	9	10	9	9	9	10	10	9	9	10	9	9	9	10	10	9	9	10	9	9	9	10	10	9	614	614	17.8	19.9	18.7
	0.931908	0.116975	-0.0460339	0.968595	Tb927.6.3500:mRNA-p1	Tb927.6.3500:mRNA-p1	Tb927.6.3500:mRNA-p1 | transcript=Tb927.6.3500:mRNA | gene=Tb927.6.3500 | organism=Trypanosoma_brucei_brucei_TREU927 | gene_product=endosomal trafficking protein RME-8, putative | transcript_product=endosomal trafficking protein RME-8, putative | location=	endosomal trafficking protein RME-8	Tb927.6.3500	72	72	72	43.5	43.5	43.5	253.87	0	323.31	4183100000	467	67	68	68	66	68	65	69	68	67	68	68	66	68	65	69	68	67	68	68	66	68	65	69	68	2236	2236	41.1	40.7	40.8
	0.930282	0.117414	-0.170565	0.888495	Tb927.9.9960:mRNA-p1	Tb927.9.9960:mRNA-p1	Tb927.9.9960:mRNA-p1 | transcript=Tb927.9.9960:mRNA | gene=Tb927.9.9960 | organism=Trypanosoma_brucei_brucei_TREU927 | gene_product=katanin P80 subunit, putative | transcript_product=katanin P80 subunit, putative | location=Tb927_09_v5.1:1576405-1578021(-)	katanin P80 subunit	Tb927.9.9960	3	3	3	10.6	10.6	10.6	59.647	0	15.623	65799000	14	3	2	2	3	3	3	2	3	3	2	2	3	3	3	2	3	3	2	2	3	3	3	2	3	538	538	10.6	6.9	6.3
	0.929925	0.11751	-0.217071	0.86031	Tb927.10.1140:mRNA-p1;Tb11.0530:mRNA-p1	Tb927.10.1140:mRNA-p1;Tb11.0530:mRNA-p1	Tb927.10.1140:mRNA-p1 | transcript=Tb927.10.1140:mRNA | gene=Tb927.10.1140 | organism=Trypanosoma_brucei_brucei_TREU927 | gene_product=epsilon tubulin | transcript_product=epsilon tubulin | location=Tb927_10_v5.1:305185-306648(-) | protein_length=487 | seq	epsilon tubulin	Tb927.10.1140	4	4	4	11.1	11.1	11.1	53.167	0	4.2342	52984000	7	4	4	3	4	4	4	4	2	4	4	3	4	4	4	4	2	4	4	3	4	4	4	4	2	487	NaN	11.1	11.1	7.2
	0.929654	0.117583	-0.176721	0.884711	Tb927.11.6350:mRNA-p1	Tb927.11.6350:mRNA-p1	Tb927.11.6350:mRNA-p1 | transcript=Tb927.11.6350:mRNA | gene=Tb927.11.6350 | organism=Trypanosoma_brucei_brucei_TREU927 | gene_product=AAA ATPase, putative | transcript_product=AAA ATPase, putative | location=Tb927_11_v5.1:1785113-1788928(-) | protein_leng	AAA ATPase	Tb927.11.6350	6	6	6	6.7	6.7	6.7	141.13	0	11.153	68628000	24	5	5	4	4	4	5	6	4	5	5	4	4	4	5	6	4	5	5	4	4	4	5	6	4	1271	1271	5.7	5.7	4.8
	0.929055	0.117746	0.229976	1.17282	Tb927.9.12380:mRNA-p1	Tb927.9.12380:mRNA-p1	Tb927.9.12380:mRNA-p1 | transcript=Tb927.9.12380:mRNA | gene=Tb927.9.12380 | organism=Trypanosoma_brucei_brucei_TREU927 | gene_product=Histidine phosphatase superfamily (branch 1), putative | transcript_product=Histidine phosphatase superfamily (branch 1),	Histidine phosphatase superfamily (branch 1)	Tb927.9.12380	2	2	2	8.9	8.9	8.9	54.443	0	7.7754	46604000	8	2	2	2	2	1	1	2	2	2	2	2	2	1	1	2	2	2	2	2	2	1	1	2	2	494	494	8.9	8.9	8.9
	0.927769	0.118095	0.153564	1.11231	Tb927.11.7707:mRNA-p1;Tb927.11.7740:mRNA-p1	Tb927.11.7707:mRNA-p1;Tb927.11.7740:mRNA-p1	Tb927.11.7707:mRNA-p1 | transcript=Tb927.11.7707:mRNA | gene=Tb927.11.7707 | organism=Trypanosoma_brucei_brucei_TREU927 | gene_product=Tctex-1 family, putative | transcript_product=Tctex-1 family, putative | location=Tb927_11_v5.1:2186473-2186850(-) | prot	Tctex-1 family	Tb927.11.7707	5	5	5	49.6	49.6	49.6	14.299	0	23.147	570050000	29	5	5	5	5	5	5	5	5	5	5	5	5	5	5	5	5	5	5	5	5	5	5	5	5	125	NaN	49.6	49.6	49.6
	0.925712	0.118655	-1.79155	0.288861	Tb927.10.110:pseudogenic_transcript-p1;Tb10.v4.0219:pseudogenic_transcript-p1	Tb927.10.110:pseudogenic_transcript-p1	Tb927.10.110:pseudogenic_transcript-p1 | transcript=Tb927.10.110:pseudogenic_transcript | gene=Tb927.10.110 | organism=Trypanosoma_brucei_brucei_TREU927 | gene_product=retrotransposon hot spot protein 2 (RHS2), pseudogene | transcript_product=retrotranspos	retrotransposon hot spot protein 2 (RHS2)	Tb927.10.110	5	1	1	12	5.1	5.1	56.209	0	3.154	60402000	5	5	5	4	5	5	5	4	4	1	1	0	1	1	1	0	1	1	1	0	1	1	1	0	1	493	NaN	12	12	6.9
	0.925491	0.118716	0.0510149	1.03599	Tb927.11.1420:mRNA-p1	Tb927.11.1420:mRNA-p1	Tb927.11.1420:mRNA-p1 | transcript=Tb927.11.1420:mRNA | gene=Tb927.11.1420 | organism=Trypanosoma_brucei_brucei_TREU927 | gene_product=hypothetical protein, conserved | transcript_product=hypothetical protein, conserved | location=Tb927_11_v5.1:417336-4199	hypothetical protein	Tb927.11.1420	22	22	22	34.7	34.7	34.7	94.838	0	94.222	702420000	103	21	20	20	20	20	21	21	19	21	20	20	20	20	21	21	19	21	20	20	20	20	21	21	19	860	860	33.5	30.2	32
	0.924796	0.118906	0.0990443	1.07106	Tb927.11.7960:mRNA-p1	Tb927.11.7960:mRNA-p1	Tb927.11.7960:mRNA-p1 | transcript=Tb927.11.7960:mRNA | gene=Tb927.11.7960 | organism=Trypanosoma_brucei_brucei_TREU927 | gene_product=kinetoplast poly(A) polymerase 1 | transcript_product=kinetoplast poly(A) polymerase 1 | location=Tb927_11_v5.1:2242812-2	kinetoplast poly(A) polymerase 1	Tb927.11.7960	6	6	6	12.7	12.7	12.7	58.436	0	6.7498	83165000	25	5	4	4	6	4	4	5	5	5	4	4	6	4	4	5	5	5	4	4	6	4	4	5	5	527	527	10.6	8.9	8.9
	0.924733	0.118923	0.231885	1.17437	Tb927.11.9600:mRNA-p1	Tb927.11.9600:mRNA-p1	Tb927.11.9600:mRNA-p1 | transcript=Tb927.11.9600:mRNA | gene=Tb927.11.9600 | organism=Trypanosoma_brucei_brucei_TREU927 | gene_product=hypothetical protein, conserved | transcript_product=hypothetical protein, conserved | location=Tb927_11_v5.1:2612762-261	hypothetical protein	Tb927.11.9600	1	1	1	4.1	4.1	4.1	34.241	0.00025278	2.6878	11363000	8	1	1	1	1	1	1	1	1	1	1	1	1	1	1	1	1	1	1	1	1	1	1	1	1	295	295	4.1	4.1	4.1
	0.922831	0.119445	0.144987	1.10572	Tb927.9.2075:mRNA-p1	Tb927.9.2075:mRNA-p1	Tb927.9.2075:mRNA-p1 | transcript=Tb927.9.2075:mRNA | gene=Tb927.9.2075 | organism=Trypanosoma_brucei_brucei_TREU927 | gene_product=hypothetical protein | transcript_product=hypothetical protein | location=Tb927_09_v5.1:468519-477050(-) | protein_length=28	hypothetical protein	Tb927.9.2075	14	14	14	20.5	20.5	20.5	302.5	0	26.243	390300000	54	10	9	11	10	9	11	11	11	10	9	11	10	9	11	11	11	10	9	11	10	9	11	11	11	2843	2843	18.9	18.3	19.3
	0.922789	0.119457	0.088037	1.06292	Tb927.11.11250:mRNA-p1	Tb927.11.11250:mRNA-p1	Tb927.11.11250:mRNA-p1 | transcript=Tb927.11.11250:mRNA | gene=Tb927.11.11250 | organism=Trypanosoma_brucei_brucei_TREU927 | gene_product=cytosolic malate dehydrogenase | transcript_product=cytosolic malate dehydrogenase | location=Tb927_11_v5.1:3011678-30	cytosolic malate dehydrogenase	Tb927.11.11250	17	17	17	55.5	55.5	55.5	35.151	0	135.86	6309900000	166	15	16	16	16	16	17	16	16	15	16	16	16	16	17	16	16	15	16	16	16	16	17	16	16	328	328	53	55.5	55.5
	0.922419	0.119559	-0.111729	0.925478	Tb927.7.2130:mRNA-p1	Tb927.7.2130:mRNA-p1	Tb927.7.2130:mRNA-p1 | transcript=Tb927.7.2130:mRNA | gene=Tb927.7.2130 | organism=Trypanosoma_brucei_brucei_TREU927 | gene_product=Uncharacterized conserved protein (DUF2036), putative | transcript_product=Uncharacterized conserved protein (DUF2036), puta	Uncharacterized conserved protein (DUF2036)	Tb927.7.2130	1	1	1	4.1	4.1	4.1	51.173	0	4.8568	25509000	4	1	1	1	1	1	1	1	1	1	1	1	1	1	1	1	1	1	1	1	1	1	1	1	1	460	460	4.1	4.1	4.1
	0.920531	0.120079	-0.157901	0.896328	Tb927.10.11410:mRNA-p1	Tb927.10.11410:mRNA-p1	Tb927.10.11410:mRNA-p1 | transcript=Tb927.10.11410:mRNA | gene=Tb927.10.11410 | organism=Trypanosoma_brucei_brucei_TREU927 | gene_product=hypothetical protein, conserved | transcript_product=hypothetical protein, conserved | location=Tb927_10_v5.1:2780151-	hypothetical protein	Tb927.10.11410	3	3	3	10.8	10.8	10.8	40.369	0	4.6725	42557000	10	2	3	2	2	2	2	2	2	2	3	2	2	2	2	2	2	2	3	2	2	2	2	2	2	371	371	6.7	10.8	7.8
	0.918229	0.120718	0.0620775	1.04397	Tb927.3.3190:mRNA-p1	Tb927.3.3190:mRNA-p1	Tb927.3.3190:mRNA-p1 | transcript=Tb927.3.3190:mRNA | gene=Tb927.3.3190 | organism=Trypanosoma_brucei_brucei_TREU927 | gene_product=Serine/threonine-protein kinase NEK7, putative | transcript_product=Serine/threonine-protein kinase NEK7, putative | locatio	Serine/threonine-protein kinase NEK7	Tb927.3.3190	21	21	21	56.5	56.5	56.5	56.152	0	160	2469300000	171	21	19	20	20	21	21	20	19	21	19	20	20	21	21	20	19	21	19	20	20	21	21	20	19	503	503	56.5	53.3	55.1
	0.91801	0.120779	0.0799036	1.05695	Tb927.5.2930:mRNA-p1	Tb927.5.2930:mRNA-p1	Tb927.5.2930:mRNA-p1 | transcript=Tb927.5.2930:mRNA | gene=Tb927.5.2930 | organism=Trypanosoma_brucei_brucei_TREU927 | gene_product=Mitochondrial ATP synthase subunit, putative | transcript_product=Mitochondrial ATP synthase subunit, putative | location=Tb	Mitochondrial ATP synthase subunit	Tb927.5.2930	18	18	18	49.5	49.5	49.5	43.308	0	57.843	611050000	109	16	17	18	18	18	18	17	16	16	17	18	18	18	18	17	16	16	17	18	18	18	18	17	16	370	370	40.5	49.5	49.5
	0.916059	0.121323	0.0563517	1.03983	Tb927.8.1200:mRNA-p1	Tb927.8.1200:mRNA-p1	Tb927.8.1200:mRNA-p1 | transcript=Tb927.8.1200:mRNA | gene=Tb927.8.1200 | organism=Trypanosoma_brucei_brucei_TREU927 | gene_product=vacuolar-type Ca2+-ATPase 2 | transcript_product=vacuolar-type Ca2+-ATPase 2 | location=Tb927_08_v5.1:381716-384958(-) | pro	vacuolar-type Ca2+-ATPase 2	Tb927.8.1200	33	33	4	41.3	41.3	4.4	119	0	153.19	1576100000	210	27	31	28	31	30	30	30	29	27	31	28	31	30	30	30	29	3	4	4	3	4	3	4	3	1080	1080	35.6	39.1	36.8
	0.915864	0.121377	-0.848608	0.55532	Tb927.6.2650:mRNA-p1	Tb927.6.2650:mRNA-p1	Tb927.6.2650:mRNA-p1 | transcript=Tb927.6.2650:mRNA | gene=Tb927.6.2650 | organism=Trypanosoma_brucei_brucei_TREU927 | gene_product=nucleolar mif4g domain-containing protein 1 | transcript_product=nucleolar mif4g domain-containing protein 1 | location=Tb92	nucleolar mif4g domain-containing protein 1	Tb927.6.2650	2	2	2	3.8	3.8	3.8	84.541	0.0030762	1.6774	21613000	3	1	1	1	2	0	1	1	1	1	1	1	2	0	1	1	1	1	1	1	2	0	1	1	1	757	757	2.5	2.5	2.5
	0.915796	0.121396	0.07445	1.05296	Tb927.7.3420:mRNA-p1	Tb927.7.3420:mRNA-p1	Tb927.7.3420:mRNA-p1 | transcript=Tb927.7.3420:mRNA | gene=Tb927.7.3420 | organism=Trypanosoma_brucei_brucei_TREU927 | gene_product=peptidyl-prolyl cis-trans isomerase, putative | transcript_product=peptidyl-prolyl cis-trans isomerase, putative | location=	peptidyl-prolyl cis-trans isomerase	Tb927.7.3420	5	5	5	46.4	46.4	46.4	12.282	0	13.66	865370000	49	5	5	5	4	4	5	4	5	5	5	5	4	4	5	4	5	5	5	5	4	4	5	4	5	112	112	46.4	46.4	46.4
	0.914652	0.121716	-0.117677	0.92167	Tb927.7.3940:mRNA-p1	Tb927.7.3940:mRNA-p1	Tb927.7.3940:mRNA-p1 | transcript=Tb927.7.3940:mRNA | gene=Tb927.7.3940 | organism=Trypanosoma_brucei_brucei_TREU927 | gene_product=mitochondrial carrier protein | transcript_product=mitochondrial carrier protein | location=Tb927_07_v5.1:1032471-1033466(+)	mitochondrial carrier protein	Tb927.7.3940	8	8	8	29.6	29.6	29.6	36.34	0	27.259	316210000	41	8	8	7	8	8	8	8	8	8	8	7	8	8	8	8	8	8	8	7	8	8	8	8	8	331	331	29.6	29.6	26.6
	0.913447	0.122054	0.125576	1.09094	Tb927.11.2060:mRNA-p1;Tb927.11.2050:mRNA-p1	Tb927.11.2060:mRNA-p1;Tb927.11.2050:mRNA-p1	Tb927.11.2060:mRNA-p1 | transcript=Tb927.11.2060:mRNA | gene=Tb927.11.2060 | organism=Trypanosoma_brucei_brucei_TREU927 | gene_product=60S acidic ribosomal protein P0, putative | transcript_product=60S acidic ribosomal protein P0, putative | location=Tb927	60S acidic ribosomal protein P0	Tb927.11.2060	17	17	17	76.9	76.9	76.9	34.627	0	169.89	19605000000	250	16	16	16	16	17	17	17	16	16	16	16	16	17	17	17	16	16	16	16	16	17	17	17	16	324	NaN	76.9	76.9	76.9
	0.913198	0.122124	-0.106876	0.928596	Tb927.10.14030:mRNA-p1	Tb927.10.14030:mRNA-p1	Tb927.10.14030:mRNA-p1 | transcript=Tb927.10.14030:mRNA | gene=Tb927.10.14030 | organism=Trypanosoma_brucei_brucei_TREU927 | gene_product=hypothetical protein, conserved | transcript_product=hypothetical protein, conserved | location=Tb927_10_v5.1:3417589-	hypothetical protein	Tb927.10.14030	12	12	12	31	31	31	50.474	0	43.02	1772600000	101	12	12	12	12	11	11	10	12	12	12	12	12	11	11	10	12	12	12	12	12	11	11	10	12	449	449	31	31	31
	0.913105	0.12215	0.174629	1.12867	Tb927.6.5130:mRNA-p1;Tb927.6.5120:mRNA-p1	Tb927.6.5130:mRNA-p1;Tb927.6.5120:mRNA-p1	Tb927.6.5130:mRNA-p1 | transcript=Tb927.6.5130:mRNA | gene=Tb927.6.5130 | organism=Trypanosoma_brucei_brucei_TREU927 | gene_product=60S acidic ribosomal protein P2, putative | transcript_product=60S acidic ribosomal protein P2, putative | location=Tb927_06	60S acidic ribosomal protein P2	Tb927.6.5130	5	5	5	82.2	82.2	82.2	10.444	0	13.219	4022400000	43	5	5	5	5	5	5	5	5	5	5	5	5	5	5	5	5	5	5	5	5	5	5	5	5	107	NaN	82.2	82.2	82.2
	0.912808	0.122234	-0.231351	0.851837	Tb927.6.4470:mRNA-p1	Tb927.6.4470:mRNA-p1	Tb927.6.4470:mRNA-p1 | transcript=Tb927.6.4470:mRNA | gene=Tb927.6.4470 | organism=Trypanosoma_brucei_brucei_TREU927 | gene_product=S-adenosylmethionine decarboxylase proenzyme | transcript_product=S-adenosylmethionine decarboxylase proenzyme | location=Tb	S-adenosylmethionine decarboxylase proenzyme	Tb927.6.4470	3	3	3	15.7	15.7	15.7	36.302	0	6.2484	37332000	9	2	2	2	2	1	3	2	2	2	2	2	2	1	3	2	2	2	2	2	2	1	3	2	2	325	325	12.9	12.9	12.9
	0.912753	0.122249	-0.0920877	0.938164	Tb927.2.4370:mRNA-p1;Tb11.v5.0653.1-p1	Tb927.2.4370:mRNA-p1;Tb11.v5.0653.1-p1	Tb927.2.4370:mRNA-p1 | transcript=Tb927.2.4370:mRNA | gene=Tb927.2.4370 | organism=Trypanosoma_brucei_brucei_TREU927 | gene_product=trypanothione synthetase | transcript_product=trypanothione synthetase | location=Tb927_02_v5.1:771007-772890(-) | protein_l	trypanothione synthetase	Tb927.2.4370	30	30	30	56.9	56.9	56.9	71.612	0	138.8	3595500000	225	28	29	29	29	28	28	30	29	28	29	29	29	28	28	30	29	28	29	29	29	28	28	30	29	627	NaN	55.7	55.8	56.8
	0.91268	0.12227	-0.15745	0.896608	Tb927.4.3380:mRNA-p1	Tb927.4.3380:mRNA-p1	Tb927.4.3380:mRNA-p1 | transcript=Tb927.4.3380:mRNA | gene=Tb927.4.3380 | organism=Trypanosoma_brucei_brucei_TREU927 | gene_product=myosin IB heavy chain, putative | transcript_product=myosin IB heavy chain, putative | location=Tb927_04_v5.1:880014-883517(	myosin IB heavy chain	Tb927.4.3380	14	14	14	18.3	18.3	18.3	131.76	0	46.83	285770000	43	12	11	12	10	9	10	11	9	12	11	12	10	9	10	11	9	12	11	12	10	9	10	11	9	1167	1167	14.9	14.1	15.9
	0.910633	0.122848	-0.0932274	0.937423	Tb927.10.8170:mRNA-p1	Tb927.10.8170:mRNA-p1	Tb927.10.8170:mRNA-p1 | transcript=Tb927.10.8170:mRNA | gene=Tb927.10.8170 | organism=Trypanosoma_brucei_brucei_TREU927 | gene_product=Nucleoporin NUP144 | transcript_product=Nucleoporin NUP144 | location=Tb927_10_v5.1:2027749-2031726(-) | protein_length=1	Nucleoporin NUP144	Tb927.10.8170	27	27	27	34.4	34.4	34.4	144.37	0	166.05	1278900000	168	26	27	26	22	25	27	26	26	26	27	26	22	25	27	26	26	26	27	26	22	25	27	26	26	1325	1325	33.2	34.4	33.3
	0.910575	0.122864	-0.0727272	0.950839	Tb927.7.6220:mRNA-p1	Tb927.7.6220:mRNA-p1	Tb927.7.6220:mRNA-p1 | transcript=Tb927.7.6220:mRNA | gene=Tb927.7.6220 | organism=Trypanosoma_brucei_brucei_TREU927 | gene_product=calcium/calmodulin-dependent protein kinase, putative | transcript_product=calcium/calmodulin-dependent protein kinase, puta	calcium/calmodulin-dependent protein kinase	Tb927.7.6220	4	4	4	11.9	11.9	11.9	60.89	0	24.094	123860000	22	4	4	4	3	3	4	4	4	4	4	4	3	3	4	4	4	4	4	4	3	3	4	4	4	545	545	11.9	11.9	11.9
	0.910551	0.122871	-0.207315	0.866148	Tb927.11.11170:mRNA-p1	Tb927.11.11170:mRNA-p1	Tb927.11.11170:mRNA-p1 | transcript=Tb927.11.11170:mRNA | gene=Tb927.11.11170 | organism=Trypanosoma_brucei_brucei_TREU927 | gene_product=hypothetical protein, conserved | transcript_product=hypothetical protein, conserved | location=Tb927_11_v5.1:2989624-	hypothetical protein	Tb927.11.11170	2	2	2	13.5	13.5	13.5	19.424	0	4.4119	19535000	12	1	2	2	1	2	1	1	2	1	2	2	1	2	1	1	2	1	2	2	1	2	1	1	2	171	171	8.2	13.5	13.5
	0.908569	0.123433	-0.669387	0.628774	Tb927.11.14150:mRNA-p1	Tb927.11.14150:mRNA-p1	Tb927.11.14150:mRNA-p1 | transcript=Tb927.11.14150:mRNA | gene=Tb927.11.14150 | organism=Trypanosoma_brucei_brucei_TREU927 | gene_product=pre-mRNA splicing factor, putative | transcript_product=pre-mRNA splicing factor, putative | location=Tb927_11_v5.1:37	pre-mRNA splicing factor	Tb927.11.14150	2	2	2	7.5	7.5	7.5	24.523	0.00073028	2.0723	15670000	2	2	2	2	2	0	2	1	2	2	2	2	2	0	2	1	2	2	2	2	2	0	2	1	2	214	214	7.5	7.5	7.5
	0.907724	0.123673	0.241391	1.18213	Tb927.5.4100:mRNA-p1	Tb927.5.4100:mRNA-p1	Tb927.5.4100:mRNA-p1 | transcript=Tb927.5.4100:mRNA | gene=Tb927.5.4100 | organism=Trypanosoma_brucei_brucei_TREU927 | gene_product=WD domain, G-beta repeat, putative | transcript_product=WD domain, G-beta repeat, putative | location=Tb927_05_v5.1:1312937-	WD domain	Tb927.5.4100	1	1	1	5	5	5	51.109	0.00049554	2.3702	5043600	1	0	1	0	1	0	1	1	1	0	1	0	1	0	1	1	1	0	1	0	1	0	1	1	1	480	480	0	5	0
	0.905373	0.124345	0.345224	1.27035	Tb927.10.11730:mRNA-p1	Tb927.10.11730:mRNA-p1	Tb927.10.11730:mRNA-p1 | transcript=Tb927.10.11730:mRNA | gene=Tb927.10.11730 | organism=Trypanosoma_brucei_brucei_TREU927 | gene_product=zinc finger protein family member, putative | transcript_product=zinc finger protein family member, putative | locatio	zinc finger protein family member	Tb927.10.11730	3	3	3	5	5	5	83.078	0.0023742	1.7178	19876000	3	2	3	3	2	2	2	3	2	2	3	3	2	2	2	3	2	2	3	3	2	2	2	3	2	756	756	2.9	5	5
	0.905312	0.124362	0.148746	1.10861	Tb927.9.8190:mRNA-p1	Tb927.9.8190:mRNA-p1	Tb927.9.8190:mRNA-p1 | transcript=Tb927.9.8190:mRNA | gene=Tb927.9.8190 | organism=Trypanosoma_brucei_brucei_TREU927 | gene_product=hypothetical protein, conserved | transcript_product=hypothetical protein, conserved | location=Tb927_09_v5.1:1344802-134556	hypothetical protein	Tb927.9.8190	9	9	9	43.7	43.7	43.7	28.802	0	32.608	338130000	43	8	8	9	9	9	8	9	9	8	8	9	9	9	8	9	9	8	8	9	9	9	8	9	9	254	254	36.2	36.2	43.7
	0.905201	0.124394	-0.150339	0.901039	Tb927.10.7340:mRNA-p1;Tb927.10.7330:mRNA-p1	Tb927.10.7340:mRNA-p1;Tb927.10.7330:mRNA-p1	Tb927.10.7340:mRNA-p1 | transcript=Tb927.10.7340:mRNA | gene=Tb927.10.7340 | organism=Trypanosoma_brucei_brucei_TREU927 | gene_product=40S ribosomal protein S24E, putative | transcript_product=40S ribosomal protein S24E, putative | location=Tb927_10_v5.1:1	40S ribosomal protein S24E	Tb927.10.7340	6	6	6	47.4	47.4	47.4	15.683	0	34.345	4086000000	68	5	6	5	6	5	5	4	6	5	6	5	6	5	5	4	6	5	6	5	6	5	5	4	6	137	NaN	42.3	47.4	42.3
	0.902879	0.125061	0.131056	1.0951	Tb927.3.2680:mRNA-p1	Tb927.3.2680:mRNA-p1	Tb927.3.2680:mRNA-p1 | transcript=Tb927.3.2680:mRNA | gene=Tb927.3.2680 | organism=Trypanosoma_brucei_brucei_TREU927 | gene_product=Ubiquitin-like domain containing protein, putative | transcript_product=Ubiquitin-like domain containing protein, putative |	Ubiquitin-like domain containing protein	Tb927.3.2680	6	6	6	21.3	21.3	21.3	58.911	0	34.789	123270000	15	5	5	6	4	3	5	4	5	5	5	6	4	3	5	4	5	5	5	6	4	3	5	4	5	531	531	17.3	17.3	21.3
	0.902762	0.125094	-0.0931401	0.93748	Tb927.11.6270:mRNA-p1	Tb927.11.6270:mRNA-p1	Tb927.11.6270:mRNA-p1 | transcript=Tb927.11.6270:mRNA | gene=Tb927.11.6270 | organism=Trypanosoma_brucei_brucei_TREU927 | gene_product=inositol-1,4,5-trisphosphate (IP3) 5-phosphatase, putative | transcript_product=inositol-1,4,5-trisphosphate (IP3) 5-phos	inositol-1	Tb927.11.6270	9	9	9	27.8	27.8	27.8	62.121	0	41.62	247190000	51	8	8	9	8	9	8	8	8	8	8	9	8	9	8	8	8	8	8	9	8	9	8	8	8	564	564	23.8	23.8	27.8
	0.902391	0.125201	-0.0584722	0.960281	Tb927.6.700:mRNA-p1	Tb927.6.700:mRNA-p1	Tb927.6.700:mRNA-p1 | transcript=Tb927.6.700:mRNA | gene=Tb927.6.700 | organism=Trypanosoma_brucei_brucei_TREU927 | gene_product=alanyl-tRNA synthetase, putative | transcript_product=alanyl-tRNA synthetase, putative | location=Tb927_06_v5.1:293742-296642(-	alanyl-tRNA synthetase	Tb927.6.700	40	40	40	52.2	52.2	52.2	105.91	0	221.98	2495400000	259	36	37	37	37	37	36	35	37	36	37	37	37	37	36	35	37	36	37	37	37	37	36	35	37	966	966	47.7	49.3	49.3
	0.900968	0.125612	-0.248426	0.841814	Tb927.11.9790:mRNA-p1	Tb927.11.9790:mRNA-p1	Tb927.11.9790:mRNA-p1 | transcript=Tb927.11.9790:mRNA | gene=Tb927.11.9790 | organism=Trypanosoma_brucei_brucei_TREU927 | gene_product=calmodulin, putative | transcript_product=calmodulin, putative | location=Tb927_11_v5.1:2647385-2647876(-) | protein_leng	calmodulin	Tb927.11.9790	4	4	4	33.1	33.1	33.1	18.411	0	30.308	89884000	11	3	3	3	3	4	4	3	3	3	3	3	3	4	4	3	3	3	3	3	3	4	4	3	3	163	163	21.5	26.4	23.9
	0.900744	0.125677	0.138216	1.10054	Tb927.4.2740:mRNA-p1	Tb927.4.2740:mRNA-p1	Tb927.4.2740:mRNA-p1 | transcript=Tb927.4.2740:mRNA | gene=Tb927.4.2740 | organism=Trypanosoma_brucei_brucei_TREU927 | gene_product=p25-alpha, putative | transcript_product=p25-alpha, putative | location=Tb927_04_v5.1:723054-723506(+) | protein_length=150	p25-alpha	Tb927.4.2740	14	14	14	76	76	76	16.327	0	45.056	8367700000	126	14	12	14	13	12	14	14	12	14	12	14	13	12	14	14	12	14	12	14	13	12	14	14	12	150	150	76	59.3	76
	0.900007	0.125891	-0.144201	0.90488	Tb927.10.13320:mRNA-p1	Tb927.10.13320:mRNA-p1	Tb927.10.13320:mRNA-p1 | transcript=Tb927.10.13320:mRNA | gene=Tb927.10.13320 | organism=Trypanosoma_brucei_brucei_TREU927 | gene_product=DNA-directed RNA polymerase II/III subunit, putative | transcript_product=DNA-directed RNA polymerase II/III subunit,	DNA-directed RNA polymerase II/III subunit	Tb927.10.13320	3	3	3	20.1	20.1	20.1	25.21	0	17.904	249100000	20	2	3	3	3	3	3	3	3	2	3	3	3	3	3	3	3	2	3	3	3	3	3	3	3	219	219	14.2	20.1	20.1
	0.89987	0.12593	-0.545874	0.684976	Tb927.2.2880:mRNA-p1	Tb927.2.2880:mRNA-p1	Tb927.2.2880:mRNA-p1 | transcript=Tb927.2.2880:mRNA | gene=Tb927.2.2880 | organism=Trypanosoma_brucei_brucei_TREU927 | gene_product=TPR repeat/Tetratricopeptide repeat, putative | transcript_product=TPR repeat/Tetratricopeptide repeat, putative | location=	TPR repeat/Tetratricopeptide repeat	Tb927.2.2880	4	4	4	12.9	12.9	12.9	47.735	0	5.5511	65163000	5	4	3	3	3	3	3	2	3	4	3	3	3	3	3	2	3	4	3	3	3	3	3	2	3	433	433	12.9	10.9	10.9
	0.89742	0.126643	0.0471582	1.03323	Tb927.8.4430:mRNA-p1	Tb927.8.4430:mRNA-p1	Tb927.8.4430:mRNA-p1 | transcript=Tb927.8.4430:mRNA | gene=Tb927.8.4430 | organism=Trypanosoma_brucei_brucei_TREU927 | gene_product=uridine phosphorylase | transcript_product=uridine phosphorylase | location=Tb927_08_v5.1:1315431-1316456(-) | protein_lengt	uridine phosphorylase	Tb927.8.4430	17	17	17	63	63	63	36.925	0	166.43	14426000000	374	17	17	17	16	17	17	17	17	17	17	17	16	17	17	17	17	17	17	17	16	17	17	17	17	341	341	63	63	63
	0.896485	0.126916	0.15893	1.11646	Tb927.11.7570:mRNA-p1	Tb927.11.7570:mRNA-p1	Tb927.11.7570:mRNA-p1 | transcript=Tb927.11.7570:mRNA | gene=Tb927.11.7570 | organism=Trypanosoma_brucei_brucei_TREU927 | gene_product=ATP-grasp domain containing protein, putative | transcript_product=ATP-grasp domain containing protein, putative | locati	ATP-grasp domain containing protein	Tb927.11.7570	6	6	6	12.1	12.1	12.1	81.262	0	12.422	94308000	12	5	6	5	6	5	6	6	6	5	6	5	6	5	6	6	6	5	6	5	6	5	6	6	6	725	725	9.1	12.1	10.1
	0.89408	0.12762	-0.515036	0.699775	Tb927.5.3550:mRNA-p1	Tb927.5.3550:mRNA-p1	Tb927.5.3550:mRNA-p1 | transcript=Tb927.5.3550:mRNA | gene=Tb927.5.3550 | organism=Trypanosoma_brucei_brucei_TREU927 | gene_product=hypothetical protein, conserved | transcript_product=hypothetical protein, conserved | location=Tb927_05_v5.1:1172666-117394	hypothetical protein	Tb927.5.3550	2	2	2	4	4	4	47.983	0.009526	1.0891	42134000	7	1	2	2	1	1	1	1	1	1	2	2	1	1	1	1	1	1	2	2	1	1	1	1	1	424	424	2.1	4	4
	0.892817	0.127992	-0.296516	0.814216	Tb927.11.15290:mRNA-p1	Tb927.11.15290:mRNA-p1	Tb927.11.15290:mRNA-p1 | transcript=Tb927.11.15290:mRNA | gene=Tb927.11.15290 | organism=Trypanosoma_brucei_brucei_TREU927 | gene_product=eRF1 methyltransferase catalytic subunit, putative | transcript_product=eRF1 methyltransferase catalytic subunit, puta	eRF1 methyltransferase catalytic subunit	Tb927.11.15290	1	1	1	7.1	7.1	7.1	29.659	0	4.6081	19319000	4	1	1	1	1	1	1	1	1	1	1	1	1	1	1	1	1	1	1	1	1	1	1	1	1	266	266	7.1	7.1	7.1
	0.892451	0.1281	-0.24362	0.844623	Tb927.3.1150:mRNA-p1	Tb927.3.1150:mRNA-p1	Tb927.3.1150:mRNA-p1 | transcript=Tb927.3.1150:mRNA | gene=Tb927.3.1150 | organism=Trypanosoma_brucei_brucei_TREU927 | gene_product=Conserved hypothetical ATP binding protein, putative | transcript_product=Conserved hypothetical ATP binding protein, putati	Conserved hypothetical ATP binding protein	Tb927.3.1150	5	5	5	26.8	26.8	26.8	30.751	0	20.549	211690000	32	5	5	5	4	5	4	4	5	5	5	5	4	5	4	4	5	5	5	5	4	5	4	4	5	280	280	26.8	26.8	26.8
	0.889927	0.128846	-0.0877376	0.940997	Tb927.5.760:mRNA-p1	Tb927.5.760:mRNA-p1	Tb927.5.760:mRNA-p1 | transcript=Tb927.5.760:mRNA | gene=Tb927.5.760 | organism=Trypanosoma_brucei_brucei_TREU927 | gene_product=Cell cycle sequence binding phosphoprotein, putative | transcript_product=Cell cycle sequence binding phosphoprotein, putative	Cell cycle sequence binding phosphoprotein	Tb927.5.760	17	17	17	39.2	39.2	39.2	79.048	0	92.511	657310000	98	17	17	17	16	15	16	16	16	17	17	17	16	15	16	16	16	17	17	17	16	15	16	16	16	740	740	39.2	39.2	39.2
	0.888614	0.129237	-0.179625	0.882933	Tb927.7.4340:mRNA-p1	Tb927.7.4340:mRNA-p1	Tb927.7.4340:mRNA-p1 | transcript=Tb927.7.4340:mRNA | gene=Tb927.7.4340 | organism=Trypanosoma_brucei_brucei_TREU927 | gene_product=Protein of unknown function (DUF1253), putative | transcript_product=Protein of unknown function (DUF1253), putative | locat	Protein of unknown function (DUF1253)	Tb927.7.4340	11	11	11	17.5	17.5	17.5	98.13	0	20.724	199510000	34	10	10	10	9	10	9	10	9	10	10	10	9	10	9	10	9	10	10	10	9	10	9	10	9	855	855	16.3	16.3	15.4
	0.888581	0.129247	0.0656681	1.04657	Tb927.4.1680:mRNA-p1	Tb927.4.1680:mRNA-p1	Tb927.4.1680:mRNA-p1 | transcript=Tb927.4.1680:mRNA | gene=Tb927.4.1680 | organism=Trypanosoma_brucei_brucei_TREU927 | gene_product=ZFP family member, putative | transcript_product=ZFP family member, putative | location=Tb927_04_v5.1:429633-431042(-) | pro	ZFP family member	Tb927.4.1680	13	13	13	42.6	42.6	42.6	51.675	0	55.228	568450000	62	11	10	11	12	11	12	12	13	11	10	11	12	11	12	12	13	11	10	11	12	11	12	12	13	469	469	37.3	32.6	40.1
	0.887742	0.129496	0.56333	1.47768	Tb927.1.1680:mRNA-p1	Tb927.1.1680:mRNA-p1	Tb927.1.1680:mRNA-p1 | transcript=Tb927.1.1680:mRNA | gene=Tb927.1.1680 | organism=Trypanosoma_brucei_brucei_TREU927 | gene_product=Transcription elongation factor 1 domain-containing protein | transcript_product=Transcription elongation factor 1 domain-co	Transcription elongation factor 1 domain-containing protein	Tb927.1.1680	1	1	1	8	8	8	25.724	0.00049714	2.4044	6390300	4	0	0	1	1	1	1	1	1	0	0	1	1	1	1	1	1	0	0	1	1	1	1	1	1	237	237	0	0	8
	0.887186	0.129663	-0.264529	0.832471	Tb927.6.1160:mRNA-p1	Tb927.6.1160:mRNA-p1	Tb927.6.1160:mRNA-p1 | transcript=Tb927.6.1160:mRNA | gene=Tb927.6.1160 | organism=Trypanosoma_brucei_brucei_TREU927 | gene_product=leucine-rich repeat protein (LRRP), putative | transcript_product=leucine-rich repeat protein (LRRP), putative | location=Tb	leucine-rich repeat protein (LRRP)	Tb927.6.1160	2	2	2	4.5	4.5	4.5	81.133	0	6.8408	33430000	10	2	1	2	2	2	2	2	2	2	1	2	2	2	2	2	2	2	1	2	2	2	2	2	2	741	741	4.5	1.8	4.5
	0.88568	0.130113	-0.16234	0.893574	Tb927.10.6490:mRNA-p1	Tb927.10.6490:mRNA-p1	Tb927.10.6490:mRNA-p1 | transcript=Tb927.10.6490:mRNA | gene=Tb927.10.6490 | organism=Trypanosoma_brucei_brucei_TREU927 | gene_product=KIAA1430 homologue, putative | transcript_product=KIAA1430 homologue, putative | location=Tb927_10_v5.1:1644685-1645170(+	KIAA1430 homologue	Tb927.10.6490	5	5	5	27.3	27.3	27.3	19.53	0	17.933	871580000	37	5	5	5	5	5	5	5	5	5	5	5	5	5	5	5	5	5	5	5	5	5	5	5	5	161	161	27.3	27.3	27.3
	0.885014	0.130312	0.135787	1.09869	Tb927.7.5790:mRNA-p1	Tb927.7.5790:mRNA-p1	Tb927.7.5790:mRNA-p1 | transcript=Tb927.7.5790:mRNA | gene=Tb927.7.5790 | organism=Trypanosoma_brucei_brucei_TREU927 | gene_product=protein disulfide isomerase, putative | transcript_product=protein disulfide isomerase, putative | location=Tb927_07_v5.1:15	protein disulfide isomerase	Tb927.7.5790	4	4	4	30.4	30.4	30.4	15.401	0	12.644	1886500000	46	4	4	4	4	4	4	4	4	4	4	4	4	4	4	4	4	4	4	4	4	4	4	4	4	135	135	30.4	30.4	30.4
	0.883922	0.13064	0.0938535	1.06722	Tb927.8.8280:mRNA-p1	Tb927.8.8280:mRNA-p1	Tb927.8.8280:mRNA-p1 | transcript=Tb927.8.8280:mRNA | gene=Tb927.8.8280 | organism=Trypanosoma_brucei_brucei_TREU927 | gene_product=hypothetical protein, conserved | transcript_product=hypothetical protein, conserved | location=Tb927_08_v5.1:2451686-245247	hypothetical protein	Tb927.8.8280	12	12	12	52.3	52.3	52.3	30.098	0	50.818	602550000	69	11	12	12	11	11	11	11	11	11	12	12	11	11	11	11	11	11	12	12	11	11	11	11	11	262	262	52.3	52.3	52.3
	0.883702	0.130707	0.255701	1.19392	Tb927.10.8920:mRNA-p1	Tb927.10.8920:mRNA-p1	Tb927.10.8920:mRNA-p1 | transcript=Tb927.10.8920:mRNA | gene=Tb927.10.8920 | organism=Trypanosoma_brucei_brucei_TREU927 | gene_product=ras-like small GTPase, putative | transcript_product=ras-like small GTPase, putative | location=Tb927_10_v5.1:2213812-221	ras-like small GTPase	Tb927.10.8920	4	4	4	16.8	16.8	16.8	38.395	0	8.0977	63492000	8	1	3	2	2	2	3	3	3	1	3	2	2	2	3	3	3	1	3	2	2	2	3	3	3	339	339	2.4	12.4	10
	0.883414	0.130794	-0.0858107	0.942255	Tb927.1.1710:mRNA-p1	Tb927.1.1710:mRNA-p1	Tb927.1.1710:mRNA-p1 | transcript=Tb927.1.1710:mRNA | gene=Tb927.1.1710 | organism=Trypanosoma_brucei_brucei_TREU927 | gene_product=transmembrane protein, conserved | transcript_product=transmembrane protein, conserved | location=Tb927_01_v5.1:430943-43630	transmembrane protein	Tb927.1.1710	20	20	20	15	15	15	195.44	0	37.258	343760000	89	15	18	17	17	18	18	15	19	15	18	17	17	18	18	15	19	15	18	17	17	18	18	15	19	1786	1786	11.8	13.4	13.6
	0.882335	0.131119	0.0956473	1.06854	Tb927.10.830:mRNA-p1	Tb927.10.830:mRNA-p1	Tb927.10.830:mRNA-p1 | transcript=Tb927.10.830:mRNA | gene=Tb927.10.830 | organism=Trypanosoma_brucei_brucei_TREU927 | gene_product=adenylate kinase, putative | transcript_product=adenylate kinase, putative | location=Tb927_10_v5.1:215236-216018(+) | prote	adenylate kinase	Tb927.10.830	14	14	14	67.3	67.3	67.3	29.765	0	120.94	1482600000	140	14	14	14	14	13	13	14	14	14	14	14	14	13	13	14	14	14	14	14	14	13	13	14	14	260	260	67.3	67.3	67.3
	0.881837	0.131269	0.0978198	1.07016	Tb927.4.3640:mRNA-p1	Tb927.4.3640:mRNA-p1	Tb927.4.3640:mRNA-p1 | transcript=Tb927.4.3640:mRNA | gene=Tb927.4.3640 | organism=Trypanosoma_brucei_brucei_TREU927 | gene_product=serine threonine-protein phosphatase PP1, putative | transcript_product=serine threonine-protein phosphatase PP1, putative |	serine threonine-protein phosphatase PP1	Tb927.4.3640	12	5	1	54.4	29.9	10.2	33.577	0	40.19	372700000	30	12	12	12	12	12	11	11	12	5	5	5	5	5	5	5	5	1	1	1	1	1	1	1	1	294	294	54.4	54.4	54.4
	0.880263	0.131746	-0.288057	0.819004	Tb927.3.2830:mRNA-p1	Tb927.3.2830:mRNA-p1	Tb927.3.2830:mRNA-p1 | transcript=Tb927.3.2830:mRNA | gene=Tb927.3.2830 | organism=Trypanosoma_brucei_brucei_TREU927 | gene_product=brix domain containing protein, putative | transcript_product=brix domain containing protein, putative | location=Tb927_03_v	brix domain containing protein	Tb927.3.2830	4	4	4	12.6	12.6	12.6	41.62	0	4.1699	57944000	10	4	3	4	4	4	4	4	4	4	3	4	4	4	4	4	4	4	3	4	4	4	4	4	4	364	364	12.6	9.9	12.6
	0.879106	0.132097	-0.415986	0.749507	Tb927.8.6130:mRNA-p1	Tb927.8.6130:mRNA-p1	Tb927.8.6130:mRNA-p1 | transcript=Tb927.8.6130:mRNA | gene=Tb927.8.6130 | organism=Trypanosoma_brucei_brucei_TREU927 | gene_product=hypothetical protein, conserved | transcript_product=hypothetical protein, conserved | location=Tb927_08_v5.1:1789528-179041	hypothetical protein	Tb927.8.6130	2	2	2	8.1	8.1	8.1	32.895	0.00025038	2.5098	19939000	4	2	2	2	2	2	2	1	2	2	2	2	2	2	2	1	2	2	2	2	2	2	2	1	2	296	296	8.1	8.1	8.1
	0.87798	0.13244	-0.236347	0.848892	Tb927.6.3550.2:mRNA-p1;Tb927.6.3550.1:mRNA-p1	Tb927.6.3550.2:mRNA-p1;Tb927.6.3550.1:mRNA-p1	Tb927.6.3550.2:mRNA-p1 | transcript=Tb927.6.3550.2:mRNA | gene=Tb927.6.3550 | organism=Trypanosoma_brucei_brucei_TREU927 | gene_product=phospholipid-translocating P-type ATPase (flippase), putative | transcript_product=phospholipid-translocating P-type ATP	phospholipid-translocating P-type ATPase (flippase)	Tb927.6.3550	6	6	6	8.1	8.1	8.1	132.56	0	12.112	82415000	11	5	5	5	4	4	3	5	4	5	5	5	4	4	3	5	4	5	5	5	4	4	3	5	4	1196	NaN	6.8	6.7	6.8
	0.877077	0.132716	-0.0308294	0.978857	Tb927.8.1170:mRNA-p1;Tb927.8.1190:mRNA-p1;Tb11.v5.0871.1-p1	Tb927.8.1170:mRNA-p1;Tb927.8.1190:mRNA-p1;Tb11.v5.0871.1-p1	Tb927.8.1170:mRNA-p1 | transcript=Tb927.8.1170:mRNA | gene=Tb927.8.1170 | organism=Trypanosoma_brucei_brucei_TREU927 | gene_product=eukaryotic translation initiation factor 3 subunit h | transcript_product=eukaryotic translation initiation factor 3 subunit	eukaryotic translation initiation factor 3 subunit h	Tb927.8.1170	10	10	10	54.4	54.4	54.4	36.419	0	203.54	2463600000	106	10	10	10	9	8	9	10	10	10	10	10	9	8	9	10	10	10	10	10	9	8	9	10	10	331	NaN	54.4	54.4	54.4
	0.876647	0.132847	-0.181205	0.881966	Tb927.8.5960:mRNA-p1	Tb927.8.5960:mRNA-p1	Tb927.8.5960:mRNA-p1 | transcript=Tb927.8.5960:mRNA | gene=Tb927.8.5960 | organism=Trypanosoma_brucei_brucei_TREU927 | gene_product=hypothetical protein, conserved | transcript_product=hypothetical protein, conserved | location=Tb927_08_v5.1:1746896-174739	hypothetical protein	Tb927.8.5960	3	3	3	29.1	29.1	29.1	19.127	0	19.445	114550000	26	3	3	3	3	3	3	3	3	3	3	3	3	3	3	3	3	3	3	3	3	3	3	3	3	165	165	29.1	29.1	29.1
	0.876426	0.132915	0.18049	1.13327	Tb927.10.14720:mRNA-p1	Tb927.10.14720:mRNA-p1	Tb927.10.14720:mRNA-p1 | transcript=Tb927.10.14720:mRNA | gene=Tb927.10.14720 | organism=Trypanosoma_brucei_brucei_TREU927 | gene_product=peroxin 13 | transcript_product=peroxin 13 | location=Tb927_10_v5.1:3593175-3594350(-) | protein_length=391 | sequence	peroxin 13	Tb927.10.14720	3	3	3	8.4	8.4	8.4	42.143	0	4.4488	30551000	17	2	3	2	2	2	2	2	2	2	3	2	2	2	2	2	2	2	3	2	2	2	2	2	2	391	391	6.6	8.4	6.6
	0.874422	0.13353	-0.305506	0.809159	Tb927.10.9130:mRNA-p1	Tb927.10.9130:mRNA-p1	Tb927.10.9130:mRNA-p1 | transcript=Tb927.10.9130:mRNA | gene=Tb927.10.9130 | organism=Trypanosoma_brucei_brucei_TREU927 | gene_product=pre-mRNA splicing factor ATP-dependent RNA helicase, putative | transcript_product=pre-mRNA splicing factor ATP-dependent	pre-mRNA splicing factor ATP-dependent RNA helicase	Tb927.10.9130	6	6	6	15.7	15.7	15.7	76.738	0	10.903	67710000	11	3	4	5	2	4	3	4	4	3	4	5	2	4	3	4	4	3	4	5	2	4	3	4	4	689	689	5.8	10.3	11.3
	0.874292	0.13357	-0.120509	0.919863	Tb927.10.3150:mRNA-p1	Tb927.10.3150:mRNA-p1	Tb927.10.3150:mRNA-p1 | transcript=Tb927.10.3150:mRNA | gene=Tb927.10.3150 | organism=Trypanosoma_brucei_brucei_TREU927 | gene_product=N-acetyltransferase, putative | transcript_product=N-acetyltransferase, putative | location=Tb927_10_v5.1:822204-822821(+	N-acetyltransferase	Tb927.10.3150	6	6	6	35.1	35.1	35.1	23.621	0	22.813	480860000	38	5	5	6	5	6	6	6	5	5	5	6	5	6	6	6	5	5	5	6	5	6	6	6	5	205	205	30.7	30.7	35.1
	0.873243	0.133893	-0.156495	0.897202	Tb927.4.110:pseudogenic_transcript-p1	Tb927.4.110:pseudogenic_transcript-p1	Tb927.4.110:pseudogenic_transcript-p1 | transcript=Tb927.4.110:pseudogenic_transcript | gene=Tb927.4.110 | organism=Trypanosoma_brucei_brucei_TREU927 | gene_product=retrotransposon hot spot protein 1 (RHS1), interrupted | transcript_product=retrotransposon	retrotransposon hot spot protein 1 (RHS1)	Tb927.4.110	15	4	1	47.4	12.8	2.5	40.669	0	9.9091	238610000	25	14	14	15	12	13	13	14	13	4	4	4	3	3	3	4	4	1	1	1	0	1	1	1	1	359	359	44.3	44.3	47.4
	0.871542	0.134418	-0.0851593	0.94268	Tb927.11.5600:mRNA-p1	Tb927.11.5600:mRNA-p1	Tb927.11.5600:mRNA-p1 | transcript=Tb927.11.5600:mRNA | gene=Tb927.11.5600 | organism=Trypanosoma_brucei_brucei_TREU927 | gene_product=Archaic Translocase of outer membrane 14 kDa subunit | transcript_product=Archaic Translocase of outer membrane 14 kDa su	Archaic Translocase of outer membrane 14 kDa subunit	Tb927.11.5600	4	4	4	48.7	48.7	48.7	13.577	0	21.812	475730000	46	4	4	4	4	4	4	4	4	4	4	4	4	4	4	4	4	4	4	4	4	4	4	4	4	119	119	48.7	48.7	48.7
	0.870718	0.134673	-0.319555	0.801317	Tb927.10.11990:mRNA-p1	Tb927.10.11990:mRNA-p1	Tb927.10.11990:mRNA-p1 | transcript=Tb927.10.11990:mRNA | gene=Tb927.10.11990 | organism=Trypanosoma_brucei_brucei_TREU927 | gene_product=60S ribosome subunit biogenesis protein NIP7, putative | transcript_product=60S ribosome subunit biogenesis protein NI	60S ribosome subunit biogenesis protein NIP7	Tb927.10.11990	1	1	1	7.4	7.4	7.4	23.952	0	3.7454	71851000	4	1	1	1	1	1	1	1	1	1	1	1	1	1	1	1	1	1	1	1	1	1	1	1	1	215	215	7.4	7.4	7.4
	0.870526	0.134733	-0.129341	0.914249	Tb927.8.3800:mRNA-p1	Tb927.8.3800:mRNA-p1	Tb927.8.3800:mRNA-p1 | transcript=Tb927.8.3800:mRNA | gene=Tb927.8.3800 | organism=Trypanosoma_brucei_brucei_TREU927 | gene_product=guanosine diphosphatase, putative | transcript_product=guanosine diphosphatase, putative | location=Tb927_08_v5.1:1129045-11	guanosine diphosphatase	Tb927.8.3800	8	8	8	22.6	22.6	22.6	65.183	0	33.364	300570000	31	6	7	8	7	7	6	6	8	6	7	8	7	7	6	6	8	6	7	8	7	7	6	6	8	603	603	18.1	19.1	22.6
	0.870125	0.134857	0.197957	1.14707	Tb927.2.2370:mRNA-p1	Tb927.2.2370:mRNA-p1	Tb927.2.2370:mRNA-p1 | transcript=Tb927.2.2370:mRNA | gene=Tb927.2.2370 | organism=Trypanosoma_brucei_brucei_TREU927 | gene_product=Vps51/Vps67, putative | transcript_product=Vps51/Vps67, putative | location=Tb927_02_v5.1:460801-465000(-) | protein_length=	Vps51/Vps67	Tb927.2.2370	4	4	4	3.6	3.6	3.6	151.54	0	6.9642	26909000	13	4	3	4	4	3	4	4	4	4	3	4	4	3	4	4	4	4	3	4	4	3	4	4	4	1399	1399	3.6	2.5	3.6
	0.869835	0.134948	-0.0574274	0.960976	Tb927.2.3030:mRNA-p1	Tb927.2.3030:mRNA-p1	Tb927.2.3030:mRNA-p1 | transcript=Tb927.2.3030:mRNA | gene=Tb927.2.3030 | organism=Trypanosoma_brucei_brucei_TREU927 | gene_product=ATP-dependent Clp protease subunit, heat shock protein 78 (HSP78), putative | transcript_product=ATP-dependent Clp protease	ATP-dependent Clp protease subunit	Tb927.2.3030	27	27	27	41.9	41.9	41.9	90.664	0	147.21	2518800000	212	23	25	27	23	24	25	24	24	23	25	27	23	24	25	24	24	23	25	27	23	24	25	24	24	812	812	36.8	39.5	41.9
	0.869546	0.135037	-0.0894046	0.939911	Tb927.2.4850:mRNA-p1	Tb927.2.4850:mRNA-p1	Tb927.2.4850:mRNA-p1 | transcript=Tb927.2.4850:mRNA | gene=Tb927.2.4850 | organism=Trypanosoma_brucei_brucei_TREU927 | gene_product=Phosducin, putative | transcript_product=Phosducin, putative | location=Tb927_02_v5.1:861375-862133(-) | protein_length=252	Phosducin	Tb927.2.4850	7	7	7	35.7	35.7	35.7	29.04	0	35.886	547760000	61	6	5	5	6	6	5	5	6	6	5	5	6	6	5	5	6	6	5	5	6	6	5	5	6	252	252	31	27.8	27.8
	0.869102	0.135176	0.0406981	1.02861	Tb927.11.12540:mRNA-p1	Tb927.11.12540:mRNA-p1	Tb927.11.12540:mRNA-p1 | transcript=Tb927.11.12540:mRNA | gene=Tb927.11.12540 | organism=Trypanosoma_brucei_brucei_TREU927 | gene_product=leucine-rich repeat protein (LRRP), putative | transcript_product=leucine-rich repeat protein (LRRP), putative | locat	leucine-rich repeat protein (LRRP)	Tb927.11.12540	30	30	30	41.4	41.4	41.4	115.21	0	107.48	1023800000	155	28	29	29	27	28	27	26	28	28	29	29	27	28	27	26	28	28	29	29	27	28	27	26	28	1052	1052	38.8	39.4	39.4
	0.868033	0.135509	0.0738692	1.05254	Tb927.11.9780:mRNA-p1	Tb927.11.9780:mRNA-p1	Tb927.11.9780:mRNA-p1 | transcript=Tb927.11.9780:mRNA | gene=Tb927.11.9780 | organism=Trypanosoma_brucei_brucei_TREU927 | gene_product=Nucleoporin NUP119 | transcript_product=Nucleoporin NUP119 | location=Tb927_11_v5.1:2643800-2647033(-) | protein_length=1	Nucleoporin NUP119	Tb927.11.9780	12	12	12	18.1	18.1	18.1	118.85	0	57.859	384210000	56	10	12	11	11	10	10	12	12	10	12	11	11	10	10	12	12	10	12	11	11	10	10	12	12	1077	1077	16	18.1	17.5
	0.866942	0.135849	-0.079329	0.946498	Tb927.8.7400:mRNA-p1;Tb927.4.5020:mRNA-p1;Tb11.v5.0504.1-p1	Tb927.8.7400:mRNA-p1;Tb927.4.5020:mRNA-p1;Tb11.v5.0504.1-p1	Tb927.8.7400:mRNA-p1 | transcript=Tb927.8.7400:mRNA | gene=Tb927.8.7400 | organism=Trypanosoma_brucei_brucei_TREU927 | gene_product=RNA polymerase IIA largest subunit | transcript_product=RNA polymerase IIA largest subunit | location=Tb927_08_v5.1:2129045-	RNA polymerase IIA largest subunit	Tb927.8.7400	50	50	50	42.3	42.3	42.3	196.73	0	209.04	1583000000	232	42	42	40	42	39	38	41	43	42	42	40	42	39	38	41	43	42	42	40	42	39	38	41	43	1765	NaN	35	34.1	34.3
	0.866605	0.135955	-0.200818	0.870057	Tb927.4.2620:mRNA-p1	Tb927.4.2620:mRNA-p1	Tb927.4.2620:mRNA-p1 | transcript=Tb927.4.2620:mRNA | gene=Tb927.4.2620 | organism=Trypanosoma_brucei_brucei_TREU927 | gene_product=hypothetical protein, conserved | transcript_product=hypothetical protein, conserved | location=Tb927_04_v5.1:693278-694009(	hypothetical protein	Tb927.4.2620	1	1	1	4.1	4.1	4.1	26.056	0.0032825	1.525	14303000	2	1	1	1	1	1	1	1	1	1	1	1	1	1	1	1	1	1	1	1	1	1	1	1	1	243	243	4.1	4.1	4.1
	0.866413	0.136015	0.10515	1.07561	Tb927.6.2090:mRNA-p1	Tb927.6.2090:mRNA-p1	Tb927.6.2090:mRNA-p1 | transcript=Tb927.6.2090:mRNA | gene=Tb927.6.2090 | organism=Trypanosoma_brucei_brucei_TREU927 | gene_product=pdz domain containing protein, putative | transcript_product=pdz domain containing protein, putative | location=Tb927_06_v5.	pdz domain containing protein	Tb927.6.2090	15	15	15	27.5	27.5	27.5	78.295	0	34.328	1142600000	96	14	13	14	14	15	14	14	14	14	13	14	14	15	14	14	14	14	13	14	14	15	14	14	14	710	710	26.1	24.1	25.5
	0.86585	0.136192	-0.227286	0.85424	Tb927.7.5330:mRNA-p1	Tb927.7.5330:mRNA-p1	Tb927.7.5330:mRNA-p1 | transcript=Tb927.7.5330:mRNA | gene=Tb927.7.5330 | organism=Trypanosoma_brucei_brucei_TREU927 | gene_product=hypothetical protein, conserved | transcript_product=hypothetical protein, conserved | location=Tb927_07_v5.1:1415981-141829	hypothetical protein	Tb927.7.5330	2	2	2	4	4	4	82.999	0	3.466	23211000	5	2	2	2	2	2	2	2	2	2	2	2	2	2	2	2	2	2	2	2	2	2	2	2	2	771	771	4	4	4
	0.863941	0.136792	-0.093658	0.937144	Tb927.7.2170:mRNA-p1	Tb927.7.2170:mRNA-p1	Tb927.7.2170:mRNA-p1 | transcript=Tb927.7.2170:mRNA | gene=Tb927.7.2170 | organism=Trypanosoma_brucei_brucei_TREU927 | gene_product=Nucleolar protein 168 | transcript_product=Nucleolar protein 168 | location=Tb927_07_v5.1:559785-564230(-) | protein_length=	Nucleolar protein 168	Tb927.7.2170	25	25	25	20.5	20.5	20.5	168.67	0	52.046	845250000	94	20	22	19	21	20	17	20	20	20	22	19	21	20	17	20	20	20	22	19	21	20	17	20	20	1481	1481	16.1	18.1	16.3
	0.863839	0.136824	-0.194248	0.874029	Tb927.11.10860:mRNA-p1	Tb927.11.10860:mRNA-p1	Tb927.11.10860:mRNA-p1 | transcript=Tb927.11.10860:mRNA | gene=Tb927.11.10860 | organism=Trypanosoma_brucei_brucei_TREU927 | gene_product=20S-pre-rRNA D-site endonuclease NOB1 | transcript_product=20S-pre-rRNA D-site endonuclease NOB1 | location=Tb927_11_v	20S-pre-rRNA D-site endonuclease NOB1	Tb927.11.10860	6	6	6	19.7	19.7	19.7	47.301	0	11.255	77599000	28	6	5	5	6	5	5	5	5	6	5	5	6	5	5	5	5	6	5	5	6	5	5	5	5	432	432	19.7	16.9	16.9
	0.863786	0.13684	-0.216648	0.860563	Tb927.8.4690:mRNA-p1	Tb927.8.4690:mRNA-p1	Tb927.8.4690:mRNA-p1 | transcript=Tb927.8.4690:mRNA | gene=Tb927.8.4690 | organism=Trypanosoma_brucei_brucei_TREU927 | gene_product=hypothetical protein, conserved | transcript_product=hypothetical protein, conserved | location=Tb927_08_v5.1:1376573-137694	hypothetical protein	Tb927.8.4690	2	2	2	22.6	22.6	22.6	13.31	0.0030813	1.6978	34041000	9	2	2	2	2	2	2	2	2	2	2	2	2	2	2	2	2	2	2	2	2	2	2	2	2	124	124	22.6	22.6	22.6
	0.863432	0.136952	-0.212344	0.863134	Tb927.9.11250:mRNA-p1	Tb927.9.11250:mRNA-p1	Tb927.9.11250:mRNA-p1 | transcript=Tb927.9.11250:mRNA | gene=Tb927.9.11250 | organism=Trypanosoma_brucei_brucei_TREU927 | gene_product=predicted WD40 repeat protein | transcript_product=predicted WD40 repeat protein | location=Tb927_09_v5.1:1776940-1778274	predicted WD40 repeat protein	Tb927.9.11250	3	3	3	11.5	11.5	11.5	50.67	0	3.9279	60510000	3	2	2	2	3	2	3	2	3	2	2	2	3	2	3	2	3	2	2	2	3	2	3	2	3	444	444	8.8	8.8	8.8
	0.862702	0.137182	-0.158076	0.896219	Tb927.9.6320:mRNA-p1;Tb11.v5.0828.1-p1	Tb927.9.6320:mRNA-p1;Tb11.v5.0828.1-p1	Tb927.9.6320:mRNA-p1 | transcript=Tb927.9.6320:mRNA | gene=Tb927.9.6320 | organism=Trypanosoma_brucei_brucei_TREU927 | gene_product=hypothetical protein, conserved | transcript_product=hypothetical protein, conserved | location=Tb927_09_v5.1:1039345-104022	hypothetical protein	Tb927.9.6320	4	4	4	21.6	21.6	21.6	31.904	0	11.089	158310000	13	3	3	3	3	4	3	3	3	3	3	3	3	4	3	3	3	3	3	3	3	4	3	3	3	291	NaN	18.9	18.9	18.9
	0.859452	0.138213	-0.238074	0.847877	Tb927.11.12190:mRNA-p1	Tb927.11.12190:mRNA-p1	Tb927.11.12190:mRNA-p1 | transcript=Tb927.11.12190:mRNA | gene=Tb927.11.12190 | organism=Trypanosoma_brucei_brucei_TREU927 | gene_product=FHA domain containing protein, putative | transcript_product=FHA domain containing protein, putative | location=Tb927_	FHA domain containing protein	Tb927.11.12190	2	2	2	5.7	5.7	5.7	61.201	0	4.6245	31254000	8	2	2	2	2	2	2	2	2	2	2	2	2	2	2	2	2	2	2	2	2	2	2	2	2	557	557	5.7	5.7	5.7
	0.859293	0.138263	-0.347621	0.785879	Tb927.11.10840:mRNA-p1	Tb927.11.10840:mRNA-p1	Tb927.11.10840:mRNA-p1 | transcript=Tb927.11.10840:mRNA | gene=Tb927.11.10840 | organism=Trypanosoma_brucei_brucei_TREU927 | gene_product=hypothetical protein, conserved | transcript_product=hypothetical protein, conserved | location=Tb927_11_v5.1:2897192-	hypothetical protein	Tb927.11.10840	3	3	3	7	7	7	55.517	0	5.8748	23729000	9	3	1	3	3	3	3	2	3	3	1	3	3	3	3	2	3	3	1	3	3	3	3	2	3	499	499	7	3.2	7
	0.859166	0.138304	0.130245	1.09448	Tb927.10.11250:mRNA-p1;Tb11.v5.0575.1-p1	Tb927.10.11250:mRNA-p1	Tb927.10.11250:mRNA-p1 | transcript=Tb927.10.11250:mRNA | gene=Tb927.10.11250 | organism=Trypanosoma_brucei_brucei_TREU927 | gene_product=Coiled-coil domain-containing protein 40 homolog | transcript_product=Coiled-coil domain-containing protein 40 homolog	Coiled-coil domain-containing protein 40 homolog	Tb927.10.11250	31	31	31	39.9	39.9	39.9	101.14	0	84.956	1047600000	104	26	23	26	23	27	25	24	26	26	23	26	23	27	25	24	26	26	23	26	23	27	25	24	26	872	NaN	35.2	32	34.5
	0.858302	0.138579	-0.239342	0.847131	Tb11.v5.0775.1-p1;Tb927.10.7560:mRNA-p1	Tb11.v5.0775.1-p1;Tb927.10.7560:mRNA-p1	Tb11.v5.0775.1-p1 | transcript=Tb11.v5.0775.1 | gene=Tb11.v5.0775 | organism=Trypanosoma_brucei_brucei_TREU927 | gene_product=methyltransferase domain containing protein, putative | transcript_product=methyltransferase domain containing protein, putative |	methyltransferase domain containing protein	Tb11.v5.0775	3	3	3	15	15	15	31.112	0	7.9013	44252000	9	3	3	3	2	1	2	3	2	3	3	3	2	1	2	3	2	3	3	3	2	1	2	3	2	274	NaN	15	15	15
	0.858102	0.138643	-0.106988	0.928524	Tb927.11.10370:mRNA-p1	Tb927.11.10370:mRNA-p1	Tb927.11.10370:mRNA-p1 | transcript=Tb927.11.10370:mRNA | gene=Tb927.11.10370 | organism=Trypanosoma_brucei_brucei_TREU927 | gene_product=glycosyl hydrolase-like protein | transcript_product=glycosyl hydrolase-like protein | location=Tb927_11_v5.1:2764624-	glycosyl hydrolase-like protein	Tb927.11.10370	10	10	10	12.4	12.4	12.4	118.83	0	13.641	197190000	39	8	10	9	9	10	10	10	10	8	10	9	9	10	10	10	10	8	10	9	9	10	10	10	10	1055	1055	10.6	12.4	11.1
	0.856747	0.139076	0.280905	1.21496	Tb927.3.2010:mRNA-p1	Tb927.3.2010:mRNA-p1	Tb927.3.2010:mRNA-p1 | transcript=Tb927.3.2010:mRNA | gene=Tb927.3.2010 | organism=Trypanosoma_brucei_brucei_TREU927 | gene_product=hypothetical protein, conserved | transcript_product=hypothetical protein, conserved | location=Tb927_03_v5.1:522585-524249(	hypothetical protein	Tb927.3.2010	2	2	2	5.1	5.1	5.1	62.262	0	2.9074	50420000	2	1	2	2	2	1	1	1	1	1	2	2	2	1	1	1	1	1	2	2	2	1	1	1	1	554	554	2.3	5.1	5.1
	0.855195	0.139574	-0.120622	0.919791	Tb927.8.1740:mRNA-p1	Tb927.8.1740:mRNA-p1	Tb927.8.1740:mRNA-p1 | transcript=Tb927.8.1740:mRNA | gene=Tb927.8.1740 | organism=Trypanosoma_brucei_brucei_TREU927 | gene_product=Mitochondrial import inner membrane translocase subunit TIM62 | transcript_product=Mitochondrial import inner membrane trans	Mitochondrial import inner membrane translocase subunit TIM62	Tb927.8.1740	15	15	15	38.5	38.5	38.5	62.143	0	57.095	597050000	65	15	13	13	14	11	14	13	13	15	13	13	14	11	14	13	13	15	13	13	14	11	14	13	13	587	587	38.5	35.3	35.3
	0.855183	0.139578	-0.273121	0.827527	Tb927.11.15770:mRNA-p1	Tb927.11.15770:mRNA-p1	Tb927.11.15770:mRNA-p1 | transcript=Tb927.11.15770:mRNA | gene=Tb927.11.15770 | organism=Trypanosoma_brucei_brucei_TREU927 | gene_product=hypothetical protein, conserved | transcript_product=hypothetical protein, conserved | location=Tb927_11_v5.1:4175714-	hypothetical protein	Tb927.11.15770	2	2	2	8.1	8.1	8.1	38.374	0	4.2707	27433000	5	2	2	2	2	2	2	2	2	2	2	2	2	2	2	2	2	2	2	2	2	2	2	2	2	357	357	8.1	8.1	8.1
	0.85495	0.139653	-0.069767	0.952792	Tb927.10.5140:mRNA-p1	Tb927.10.5140:mRNA-p1	Tb927.10.5140:mRNA-p1 | transcript=Tb927.10.5140:mRNA | gene=Tb927.10.5140 | organism=Trypanosoma_brucei_brucei_TREU927 | gene_product=Mitogen-activated protein kinase 6 | transcript_product=Mitogen-activated protein kinase 6 | location=Tb927_10_v5.1:12613	Mitogen-activated protein kinase 6	Tb927.10.5140	24	24	23	59.7	59.7	57.9	49.74	0	95.102	2286900000	192	21	21	22	21	21	21	22	22	21	21	22	21	21	21	22	22	20	20	21	20	20	20	21	21	442	442	55.4	52.5	55.4
	0.85484	0.139688	0.0896983	1.06415	Tb927.7.4250:mRNA-p1;Tb927.7.4240:mRNA-p1	Tb927.7.4250:mRNA-p1;Tb927.7.4240:mRNA-p1	Tb927.7.4250:mRNA-p1 | transcript=Tb927.7.4250:mRNA | gene=Tb927.7.4250 | organism=Trypanosoma_brucei_brucei_TREU927 | gene_product=hypothetical protein, conserved | transcript_product=hypothetical protein, conserved | location=Tb927_07_v5.1:1132871-113320	hypothetical protein	Tb927.7.4250	4	4	4	36.6	36.6	36.6	12.486	0	19.725	220290000	21	4	4	4	4	3	4	4	4	4	4	4	4	3	4	4	4	4	4	4	4	3	4	4	4	112	NaN	36.6	36.6	36.6
	0.85467	0.139743	-0.173688	0.886573	Tb927.9.12870:mRNA-p1	Tb927.9.12870:mRNA-p1	Tb927.9.12870:mRNA-p1 | transcript=Tb927.9.12870:mRNA | gene=Tb927.9.12870 | organism=Trypanosoma_brucei_brucei_TREU927 | gene_product=trafficking protein particle complex subunit 1, putative | transcript_product=trafficking protein particle complex subuni	trafficking protein particle complex subunit 1	Tb927.9.12870	1	1	1	5.7	5.7	5.7	16.167	0.0039664	1.4414	20606000	4	1	1	1	1	1	1	1	1	1	1	1	1	1	1	1	1	1	1	1	1	1	1	1	1	140	140	5.7	5.7	5.7
	0.854216	0.139889	0.05861	1.04146	Tb927.11.12230:mRNA-p1	Tb927.11.12230:mRNA-p1	Tb927.11.12230:mRNA-p1 | transcript=Tb927.11.12230:mRNA | gene=Tb927.11.12230 | organism=Trypanosoma_brucei_brucei_TREU927 | gene_product=ATP-dependent protease ATPase subunit HslU2 | transcript_product=ATP-dependent protease ATPase subunit HslU2 | locatio	ATP-dependent protease ATPase subunit HslU2	Tb927.11.12230	17	17	17	44.8	44.8	44.8	54.897	0	86.561	538990000	84	13	15	14	14	16	14	16	14	13	15	14	14	16	14	16	14	13	15	14	14	16	14	16	14	496	496	35.5	40.9	37.5
	0.854048	0.139943	0.0905375	1.06477	Tb927.11.13500:mRNA-p1	Tb927.11.13500:mRNA-p1	Tb927.11.13500:mRNA-p1 | transcript=Tb927.11.13500:mRNA | gene=Tb927.11.13500 | organism=Trypanosoma_brucei_brucei_TREU927 | gene_product=par1 | transcript_product=par1 | location=Tb927_11_v5.1:3610617-3612395(-) | protein_length=592 | sequence_SO=chromoso	par1	Tb927.11.13500	43	43	43	74.3	74.3	74.3	68.349	0	323.31	16639000000	463	42	41	42	43	41	43	41	42	42	41	42	43	41	43	41	42	42	41	42	43	41	43	41	42	592	592	70.9	70.8	74.2
	0.852235	0.140529	-0.313128	0.804895	Tb927.10.4660:mRNA-p1	Tb927.10.4660:mRNA-p1	Tb927.10.4660:mRNA-p1 | transcript=Tb927.10.4660:mRNA | gene=Tb927.10.4660 | organism=Trypanosoma_brucei_brucei_TREU927 | gene_product=Transcription factor S-II (TFIIS), central domain containing protein, putative | transcript_product=Transcription factor	Transcription factor S-II (TFIIS)	Tb927.10.4660	1	1	1	8	8	8	20.908	0	4.7247	50001000	8	1	1	1	1	1	1	1	1	1	1	1	1	1	1	1	1	1	1	1	1	1	1	1	1	188	188	8	8	8
	0.852159	0.140553	-0.225368	0.855377	Tb927.11.13380:mRNA-p1	Tb927.11.13380:mRNA-p1	Tb927.11.13380:mRNA-p1 | transcript=Tb927.11.13380:mRNA | gene=Tb927.11.13380 | organism=Trypanosoma_brucei_brucei_TREU927 | gene_product=ATP-dependent helicase, putative | transcript_product=ATP-dependent helicase, putative | location=Tb927_11_v5.1:358613	ATP-dependent helicase	Tb927.11.13380	10	10	10	6.9	6.9	6.9	223.56	0	15.154	97643000	26	7	8	8	8	7	8	6	10	7	8	8	8	7	8	6	10	7	8	8	8	7	8	6	10	2026	2026	4.7	5.8	5.9
	0.852103	0.140571	-0.207486	0.866045	Tb927.11.1010:mRNA-p1	Tb927.11.1010:mRNA-p1	Tb927.11.1010:mRNA-p1 | transcript=Tb927.11.1010:mRNA | gene=Tb927.11.1010 | organism=Trypanosoma_brucei_brucei_TREU927 | gene_product=chaperone protein DnaJ, putative | transcript_product=chaperone protein DnaJ, putative | location=Tb927_11_v5.1:258816-25	chaperone protein DnaJ	Tb927.11.1010	3	3	3	14.8	14.8	14.8	41.739	0	6.0632	53060000	8	3	3	3	2	3	3	1	3	3	3	3	2	3	3	1	3	3	3	3	2	3	3	1	3	371	371	14.8	14.8	14.8
	0.84982	0.141312	-0.303781	0.810127	Tb927.10.4290:mRNA-p1	Tb927.10.4290:mRNA-p1	Tb927.10.4290:mRNA-p1 | transcript=Tb927.10.4290:mRNA | gene=Tb927.10.4290 | organism=Trypanosoma_brucei_brucei_TREU927 | gene_product=hypothetical protein, conserved | transcript_product=hypothetical protein, conserved | location=Tb927_10_v5.1:1117602-111	hypothetical protein	Tb927.10.4290	3	3	3	14.5	14.5	14.5	31.775	0	4.5322	50523000	13	2	3	3	3	3	3	2	3	2	3	3	3	3	3	2	3	2	3	3	3	3	3	2	3	275	275	8.7	14.5	14.5
	0.849378	0.141456	-0.501101	0.706568	Tb927.8.5410:mRNA-p1	Tb927.8.5410:mRNA-p1	Tb927.8.5410:mRNA-p1 | transcript=Tb927.8.5410:mRNA | gene=Tb927.8.5410 | organism=Trypanosoma_brucei_brucei_TREU927 | gene_product=hypothetical protein, conserved | transcript_product=hypothetical protein, conserved | location=Tb927_08_v5.1:1603879-160576	hypothetical protein	Tb927.8.5410	1	1	1	3.2	3.2	3.2	70.899	0.0088737	1.1306	9683100	1	0	1	0	1	0	1	1	1	0	1	0	1	0	1	1	1	0	1	0	1	0	1	1	1	628	628	0	3.2	0
	0.848828	0.141635	0.183447	1.13559	Tb927.10.2020:mRNA-p1	Tb927.10.2020:mRNA-p1	Tb927.10.2020:mRNA-p1 | transcript=Tb927.10.2020:mRNA | gene=Tb927.10.2020 | organism=Trypanosoma_brucei_brucei_TREU927 | gene_product=hexokinase | transcript_product=hexokinase | location=Tb927_10_v5.1:529818-531233(+) | protein_length=471 | sequence_SO=c	hexokinase	Tb927.10.2020	32	3	1	72.8	7.9	3.6	51.148	0	84.668	7123300000	103	31	30	32	31	30	30	30	30	3	3	3	3	3	3	3	3	1	1	1	1	1	1	1	1	471	471	67.1	67.1	72.8
	0.848794	0.141647	0.0812092	1.0579	Tb927.3.3900:mRNA-p1	Tb927.3.3900:mRNA-p1	Tb927.3.3900:mRNA-p1 | transcript=Tb927.3.3900:mRNA | gene=Tb927.3.3900 | organism=Trypanosoma_brucei_brucei_TREU927 | gene_product=carnitine O-palmitoyltransferase II, putative | transcript_product=carnitine O-palmitoyltransferase II, putative | location=	carnitine O-palmitoyltransferase II	Tb927.3.3900	19	19	19	44	44	44	67.395	0	99.828	692530000	91	17	16	17	17	16	19	19	13	17	16	17	17	16	19	19	13	17	16	17	17	16	19	19	13	621	621	36.4	37.4	39
	0.846351	0.142446	-0.10265	0.931321	Tb927.10.2530:mRNA-p1	Tb927.10.2530:mRNA-p1	Tb927.10.2530:mRNA-p1 | transcript=Tb927.10.2530:mRNA | gene=Tb927.10.2530 | organism=Trypanosoma_brucei_brucei_TREU927 | gene_product=adenylate kinase, putative | transcript_product=adenylate kinase, putative | location=Tb927_10_v5.1:658114-658782(+) | pr	adenylate kinase	Tb927.10.2530	11	11	11	60.4	60.4	60.4	24.941	0	51.797	2753300000	115	11	11	11	11	11	11	11	11	11	11	11	11	11	11	11	11	11	11	11	11	11	11	11	11	222	222	60.4	60.4	60.4
	0.844365	0.143099	-0.67326	0.627088	Tb927.8.3920:mRNA-p1;Tb11.v5.0737.1-p1;Tb927.8.3500:mRNA-p1	Tb927.8.3920:mRNA-p1;Tb11.v5.0737.1-p1;Tb927.8.3500:mRNA-p1	Tb927.8.3920:mRNA-p1 | transcript=Tb927.8.3920:mRNA | gene=Tb927.8.3920 | organism=Trypanosoma_brucei_brucei_TREU927 | gene_product=mms19 nucleotide excision repair protein homolog | transcript_product=mms19 nucleotide excision repair protein homolog | loc	mms19 nucleotide excision repair protein homolog	Tb927.8.3920	2	2	2	3	3	3	104.03	0	3.4127	9295000	2	0	1	1	1	0	1	1	1	0	1	1	1	0	1	1	1	0	1	1	1	0	1	1	1	947	NaN	0	1.6	1.6
	0.843401	0.143416	-0.24325	0.84484	Tb927.5.3070:mRNA-p1	Tb927.5.3070:mRNA-p1	Tb927.5.3070:mRNA-p1 | transcript=Tb927.5.3070:mRNA | gene=Tb927.5.3070 | organism=Trypanosoma_brucei_brucei_TREU927 | gene_product=Zinc finger, C3HC4 type (RING finger), putative | transcript_product=Zinc finger, C3HC4 type (RING finger), putative | locat	Zinc finger	Tb927.5.3070	1	1	1	3.5	3.5	3.5	60.341	0.0078017	1.2303	12705000	6	1	1	1	1	1	1	1	1	1	1	1	1	1	1	1	1	1	1	1	1	1	1	1	1	538	538	3.5	3.5	3.5
	0.843392	0.143419	-0.0953212	0.936064	Tb11.v5.0540.1-p1;Tb927.4.4860:mRNA-p1;Tb927.4.4820:mRNA-p1;Tb927.4.4840:mRNA-p1	Tb11.v5.0540.1-p1;Tb927.4.4860:mRNA-p1;Tb927.4.4820:mRNA-p1;Tb927.4.4840:mRNA-p1	Tb11.v5.0540.1-p1 | transcript=Tb11.v5.0540.1 | gene=Tb11.v5.0540 | organism=Trypanosoma_brucei_brucei_TREU927 | gene_product=amino acid transporter 8, putative | transcript_product=amino acid transporter 8, putative | location=Tb927_11_bin_v5.1:2354708-23	amino acid transporter 8	Tb11.v5.0540	7	7	7	20.8	20.8	20.8	52.651	0	61.67	2041200000	60	7	7	7	6	7	7	6	7	7	7	7	6	7	7	6	7	7	7	7	6	7	7	6	7	490	NaN	20.8	20.8	20.8
	0.842278	0.143788	-0.144316	0.904808	Tb927.9.9660:mRNA-p1	Tb927.9.9660:mRNA-p1	Tb927.9.9660:mRNA-p1 | transcript=Tb927.9.9660:mRNA | gene=Tb927.9.9660 | organism=Trypanosoma_brucei_brucei_TREU927 | gene_product=Mitochondrial import receptor subunit ATOM40 | transcript_product=Mitochondrial import receptor subunit ATOM40 | location=Tb	Mitochondrial import receptor subunit ATOM40	Tb927.9.9660	9	9	9	38.5	38.5	38.5	38.295	0	78.982	659960000	42	9	8	8	7	9	8	8	9	9	8	8	7	9	8	8	9	9	8	8	7	9	8	8	9	351	351	38.5	35.3	35
	0.840378	0.144418	-0.121193	0.919427	Tb927.4.1920:mRNA-p1	Tb927.4.1920:mRNA-p1	Tb927.4.1920:mRNA-p1 | transcript=Tb927.4.1920:mRNA | gene=Tb927.4.1920 | organism=Trypanosoma_brucei_brucei_TREU927 | gene_product=GPI transamidase subunit 16, putative | transcript_product=GPI transamidase subunit 16, putative | location=Tb927_04_v5.1:48	GPI transamidase subunit 16	Tb927.4.1920	21	21	21	45	45	45	75.806	0	137.02	1554300000	134	19	19	18	19	20	20	19	19	19	19	18	19	20	20	19	19	19	19	18	19	20	20	19	19	686	686	41.7	40.7	36.9
	0.840358	0.144425	-0.0712724	0.951798	Tb927.4.2450:mRNA-p1	Tb927.4.2450:mRNA-p1	Tb927.4.2450:mRNA-p1 | transcript=Tb927.4.2450:mRNA | gene=Tb927.4.2450 | organism=Trypanosoma_brucei_brucei_TREU927 | gene_product=protein disulfide isomerase 1 | transcript_product=protein disulfide isomerase 1 | location=Tb927_04_v5.1:636840-638081(+) |	protein disulfide isomerase 1	Tb927.4.2450	20	20	20	59.8	59.8	59.8	44.722	0	274.05	8327000000	240	20	20	20	20	18	19	19	20	20	20	20	20	18	19	19	20	20	20	20	20	18	19	19	20	413	413	59.8	59.8	59.8
	0.840345	0.144429	-0.0545659	0.962884	Tb927.7.710:mRNA-p1	Tb927.7.710:mRNA-p1	Tb927.7.710:mRNA-p1 | transcript=Tb927.7.710:mRNA | gene=Tb927.7.710 | organism=Trypanosoma_brucei_brucei_TREU927 | gene_product=heat shock 70 kDa protein, putative | transcript_product=heat shock 70 kDa protein, putative | location=Tb927_07_v5.1:156246-15	heat shock 70 kDa protein	Tb927.7.710	30	28	28	59.5	54.9	54.9	70.211	0	323.31	8706200000	332	30	28	30	29	29	30	30	30	28	26	28	27	27	28	28	28	28	26	28	27	27	28	28	28	639	639	59.5	58.2	59.5
	0.840218	0.144472	-0.0470357	0.967923	Tb927.7.4700:mRNA-p1	Tb927.7.4700:mRNA-p1	Tb927.7.4700:mRNA-p1 | transcript=Tb927.7.4700:mRNA | gene=Tb927.7.4700 | organism=Trypanosoma_brucei_brucei_TREU927 | gene_product=WD domain, G-beta repeat, putative | transcript_product=WD domain, G-beta repeat, putative | location=Tb927_07_v5.1:1250046-	WD domain	Tb927.7.4700	33	33	1	57.4	57.4	2.9	77.7	0	209.45	4457100000	282	30	32	29	31	30	31	32	32	30	32	29	31	30	31	32	32	1	1	1	1	1	1	1	1	698	698	53.6	57.4	52.4
	0.838159	0.145158	-0.126469	0.916071	Tb927.1.4830:mRNA-p1	Tb927.1.4830:mRNA-p1	Tb927.1.4830:mRNA-p1 | transcript=Tb927.1.4830:mRNA | gene=Tb927.1.4830 | organism=Trypanosoma_brucei_brucei_TREU927 | gene_product=phospholipase A1 | transcript_product=phospholipase A1 | location=Tb927_01_v5.1:986718-987620(+) | protein_length=300 | sequ	phospholipase A1	Tb927.1.4830	10	10	10	50.7	50.7	50.7	32.404	0	84.829	2972400000	139	10	10	10	10	10	10	10	10	10	10	10	10	10	10	10	10	10	10	10	10	10	10	10	10	300	300	50.7	50.7	50.7
	0.837263	0.145458	0.112293	1.08095	Tb927.11.9700:mRNA-p1	Tb927.11.9700:mRNA-p1	Tb927.11.9700:mRNA-p1 | transcript=Tb927.11.9700:mRNA | gene=Tb927.11.9700 | organism=Trypanosoma_brucei_brucei_TREU927 | gene_product=transcription factor BTF3, putative | transcript_product=transcription factor BTF3, putative | location=Tb927_11_v5.1:263	transcription factor BTF3	Tb927.11.9700	5	5	5	60.4	60.4	60.4	11.406	0	60.844	4475200000	111	5	5	5	5	5	5	5	5	5	5	5	5	5	5	5	5	5	5	5	5	5	5	5	5	101	101	60.4	60.4	60.4
	0.837262	0.145458	-0.17946	0.883033	Tb927.10.4100:mRNA-p1	Tb927.10.4100:mRNA-p1	Tb927.10.4100:mRNA-p1 | transcript=Tb927.10.4100:mRNA | gene=Tb927.10.4100 | organism=Trypanosoma_brucei_brucei_TREU927 | gene_product=hypothetical protein, conserved | transcript_product=hypothetical protein, conserved | location=Tb927_10_v5.1:1079673-108	hypothetical protein	Tb927.10.4100	1	1	1	1.7	1.7	1.7	74.653	0.00025304	2.6941	11862000	6	1	1	1	1	1	1	1	1	1	1	1	1	1	1	1	1	1	1	1	1	1	1	1	1	691	691	1.7	1.7	1.7
	0.836852	0.145596	0.0754066	1.05366	Tb927.8.570:mRNA-p1	Tb927.8.570:mRNA-p1	Tb927.8.570:mRNA-p1 | transcript=Tb927.8.570:mRNA | gene=Tb927.8.570 | organism=Trypanosoma_brucei_brucei_TREU927 | gene_product=proteasome regulatory non-ATP-ase subunit 10 | transcript_product=proteasome regulatory non-ATP-ase subunit 10 | location=Tb927	proteasome regulatory non-ATP-ase subunit 10	Tb927.8.570	12	12	12	51.1	51.1	51.1	35.778	0	90.654	644720000	69	11	10	10	9	11	10	11	11	11	10	10	9	11	10	11	11	11	10	10	9	11	10	11	11	331	331	48.9	44.1	44.1
	0.836672	0.145656	0.139766	1.10173	Tb927.10.650:mRNA-p1	Tb927.10.650:mRNA-p1	Tb927.10.650:mRNA-p1 | transcript=Tb927.10.650:mRNA | gene=Tb927.10.650 | organism=Trypanosoma_brucei_brucei_TREU927 | gene_product=Component of motile flagella 17 | transcript_product=Component of motile flagella 17 | location=Tb927_10_v5.1:173390-174052(	Component of motile flagella 17	Tb927.10.650	7	7	7	40.5	40.5	40.5	25.588	0	39.797	371100000	37	6	7	5	6	5	6	7	5	6	7	5	6	5	6	7	5	6	7	5	6	5	6	7	5	220	220	34.1	40.5	29.5
	0.835831	0.145938	0.270071	1.20587	Tb927.10.1580:mRNA-p1	Tb927.10.1580:mRNA-p1	Tb927.10.1580:mRNA-p1 | transcript=Tb927.10.1580:mRNA | gene=Tb927.10.1580 | organism=Trypanosoma_brucei_brucei_TREU927 | gene_product=MICOS complex subunit MIC10-1 | transcript_product=MICOS complex subunit MIC10-1 | location=Tb927_10_v5.1:433322-433666(-	MICOS complex subunit MIC10-1	Tb927.10.1580	3	3	3	26.3	26.3	26.3	12.232	0	3.8884	38742000	5	2	3	3	1	1	2	3	3	2	3	3	1	1	2	3	3	2	3	3	1	1	2	3	3	114	114	14	26.3	26.3
	0.835571	0.146025	-0.0687628	0.953455	Tb927.10.2370:mRNA-p1	Tb927.10.2370:mRNA-p1	Tb927.10.2370:mRNA-p1 | transcript=Tb927.10.2370:mRNA | gene=Tb927.10.2370 | organism=Trypanosoma_brucei_brucei_TREU927 | gene_product=Lupus La protein homolog, putative | transcript_product=Lupus La protein homolog, putative | location=Tb927_10_v5.1:60737	Lupus La protein homolog	Tb927.10.2370	23	23	23	65.4	65.4	65.4	37.659	0	135.96	4208300000	196	22	23	22	22	23	22	23	23	22	23	22	22	23	22	23	23	22	23	22	22	23	22	23	23	335	335	63	65.4	63
	0.83454	0.146373	-0.210145	0.86445	Tb927.6.2900:mRNA-p1	Tb927.6.2900:mRNA-p1	Tb927.6.2900:mRNA-p1 | transcript=Tb927.6.2900:mRNA | gene=Tb927.6.2900 | organism=Trypanosoma_brucei_brucei_TREU927 | gene_product=dendritic cell-derived IFNG-induced protein | transcript_product=dendritic cell-derived IFNG-induced protein | location=Tb92	dendritic cell-derived IFNG-induced protein	Tb927.6.2900	5	5	5	7.1	7.1	7.1	81.733	0	3.9236	37666000	2	4	5	4	4	4	4	4	4	4	5	4	4	4	4	4	4	4	5	4	4	4	4	4	4	735	735	4.9	7.1	4.9
	0.834492	0.146389	0.106286	1.07645	Tb927.10.2900:mRNA-p1;Tb11.v5.0837.1-p1	Tb927.10.2900:mRNA-p1;Tb11.v5.0837.1-p1	Tb927.10.2900:mRNA-p1 | transcript=Tb927.10.2900:mRNA | gene=Tb927.10.2900 | organism=Trypanosoma_brucei_brucei_TREU927 | gene_product=importin beta-1 subunit, putative | transcript_product=importin beta-1 subunit, putative | location=Tb927_10_v5.1:748683-	importin beta-1 subunit	Tb927.10.2900	21	21	21	37.1	37.1	37.1	95.068	0	249.32	2399700000	146	20	18	18	20	21	20	19	20	20	18	18	20	21	20	19	20	20	18	18	20	21	20	19	20	866	NaN	36.1	31.8	33
	0.834205	0.146486	0.0774922	1.05518	Tb927.10.1960:mRNA-p1	Tb927.10.1960:mRNA-p1	Tb927.10.1960:mRNA-p1 | transcript=Tb927.10.1960:mRNA | gene=Tb927.10.1960 | organism=Trypanosoma_brucei_brucei_TREU927 | gene_product=hypothetical protein, conserved | transcript_product=hypothetical protein, conserved | location=Tb927_10_v5.1:511172-5134	hypothetical protein	Tb927.10.1960	5	5	5	10	10	10	83.438	0	13.538	81267000	20	4	4	5	5	5	5	5	4	4	4	5	5	5	5	5	4	4	4	5	5	5	5	5	4	748	748	7.6	7.8	10
	0.833581	0.146696	-0.198225	0.871622	Tb927.1.4180:mRNA-p1	Tb927.1.4180:mRNA-p1	Tb927.1.4180:mRNA-p1 | transcript=Tb927.1.4180:mRNA | gene=Tb927.1.4180 | organism=Trypanosoma_brucei_brucei_TREU927 | gene_product=leucine-rich repeat protein (LRRP), putative | transcript_product=leucine-rich repeat protein (LRRP), putative | location=Tb	leucine-rich repeat protein (LRRP)	Tb927.1.4180	10	10	10	21.5	21.5	21.5	81.988	0	19.592	184960000	27	6	5	8	7	6	7	6	7	6	5	8	7	6	7	6	7	6	5	8	7	6	7	6	7	744	744	12.4	10.6	16
	0.832657	0.147009	-0.172341	0.887402	Tb927.9.11740:mRNA-p1	Tb927.9.11740:mRNA-p1	Tb927.9.11740:mRNA-p1 | transcript=Tb927.9.11740:mRNA | gene=Tb927.9.11740 | organism=Trypanosoma_brucei_brucei_TREU927 | gene_product=cyclophilin type peptidyl-prolyl cis-trans isomerase, putative | transcript_product=cyclophilin type peptidyl-prolyl cis-	cyclophilin type peptidyl-prolyl cis-trans isomerase	Tb927.9.11740	6	6	6	56.8	56.8	56.8	20.281	0	16.21	115920000	21	6	6	5	6	6	5	6	5	6	6	5	6	6	5	6	5	6	6	5	6	6	5	6	5	183	183	56.8	56.8	43.7
	0.830672	0.147682	0.479768	1.39452	Tb927.9.2270:mRNA-p1	Tb927.9.2270:mRNA-p1	Tb927.9.2270:mRNA-p1 | transcript=Tb927.9.2270:mRNA | gene=Tb927.9.2270 | organism=Trypanosoma_brucei_brucei_TREU927 | gene_product=hypothetical protein, conserved | transcript_product=hypothetical protein, conserved | location=Tb927_09_v5.1:506220-508409(	hypothetical protein	Tb927.9.2270	2	2	2	4.4	4.4	4.4	78.354	0	3.6944	14308000	5	1	2	2	2	2	2	2	2	1	2	2	2	2	2	2	2	1	2	2	2	2	2	2	2	729	729	2.2	4.4	4.4
	0.829123	0.14821	-0.0697842	0.952781	Tb927.3.5520:mRNA-p1;REV__Tb927.11.5400:mRNA-p1	Tb927.3.5520:mRNA-p1	Tb927.3.5520:mRNA-p1 | transcript=Tb927.3.5520:mRNA | gene=Tb927.3.5520 | organism=Trypanosoma_brucei_brucei_TREU927 | gene_product=26S proteasome regulatory non-ATPase subunit | transcript_product=26S proteasome regulatory non-ATPase subunit | location=Tb	26S proteasome regulatory non-ATPase subunit	Tb927.3.5520	36	36	36	54.7	54.7	54.7	99.897	0	247.48	2753500000	248	31	31	35	30	32	32	30	35	31	31	35	30	32	32	30	35	31	31	35	30	32	32	30	35	911	NaN	48.1	47.2	53.2
	0.828864	0.148298	-0.0835948	0.943703	Tb927.10.5840:mRNA-p1	Tb927.10.5840:mRNA-p1	Tb927.10.5840:mRNA-p1 | transcript=Tb927.10.5840:mRNA | gene=Tb927.10.5840 | organism=Trypanosoma_brucei_brucei_TREU927 | gene_product=translation elongation factor 1-beta, putative | transcript_product=translation elongation factor 1-beta, putative | loca	translation elongation factor 1-beta	Tb927.10.5840	14	7	7	73.1	57.7	57.7	21.959	0	284.84	10532000000	177	14	13	13	14	13	14	13	13	7	7	7	7	7	7	7	7	7	7	7	7	7	7	7	7	201	201	73.1	73.1	73.1
	0.827053	0.148918	-0.179802	0.882824	Tb927.10.1980:mRNA-p1;Tb11.v5.0642.1-p1	Tb927.10.1980:mRNA-p1	Tb927.10.1980:mRNA-p1 | transcript=Tb927.10.1980:mRNA | gene=Tb927.10.1980 | organism=Trypanosoma_brucei_brucei_TREU927 | gene_product=hypothetical protein, conserved | transcript_product=hypothetical protein, conserved | location=Tb927_10_v5.1:519240-5213	hypothetical protein	Tb927.10.1980	9	9	9	19.4	19.4	19.4	77.636	0	39.571	353030000	34	8	7	8	8	8	8	7	9	8	7	8	8	8	8	7	9	8	7	8	8	8	8	7	9	706	NaN	17.7	15.4	17.7
	0.826905	0.148969	-0.0983152	0.934123	Tb927.7.7430:mRNA-p1;Tb927.7.7420:mRNA-p1	Tb927.7.7430:mRNA-p1;Tb927.7.7420:mRNA-p1	Tb927.7.7430:mRNA-p1 | transcript=Tb927.7.7430:mRNA | gene=Tb927.7.7430 | organism=Trypanosoma_brucei_brucei_TREU927 | gene_product=ATP synthase F1, alpha subunit | transcript_product=ATP synthase F1, alpha subunit | location=Tb927_07_v5.1:2135097-2136851(	ATP synthase F1	Tb927.7.7430	25	25	25	50.9	50.9	50.9	63.502	0	118.82	5139700000	271	22	25	23	23	21	25	24	24	22	25	23	23	21	25	24	24	22	25	23	23	21	25	24	24	584	NaN	42	50.9	47.6
	0.826158	0.149225	-0.326649	0.797387	Tb927.9.14370:mRNA-p1;Tb927.8.6180:mRNA-p1	Tb927.9.14370:mRNA-p1;Tb927.8.6180:mRNA-p1	Tb927.9.14370:mRNA-p1 | transcript=Tb927.9.14370:mRNA | gene=Tb927.9.14370 | organism=Trypanosoma_brucei_brucei_TREU927 | gene_product=60S ribosomal protein L26, putative | transcript_product=60S ribosomal protein L26, putative | location=Tb927_09_v5.1:224	60S ribosomal protein L26	Tb927.9.14370	3	3	3	26.6	26.6	26.6	16.454	0	12.103	1921000000	40	3	3	3	3	3	3	3	3	3	3	3	3	3	3	3	3	3	3	3	3	3	3	3	3	143	NaN	26.6	26.6	26.6
	0.825467	0.149463	-0.143079	0.905584	Tb927.6.3210:mRNA-p1	Tb927.6.3210:mRNA-p1	Tb927.6.3210:mRNA-p1 | transcript=Tb927.6.3210:mRNA | gene=Tb927.6.3210 | organism=Trypanosoma_brucei_brucei_TREU927 | gene_product=Adenylate kinase, nuclear | transcript_product=Adenylate kinase, nuclear | location=Tb927_06_v5.1:952233-952766(+) | protein	Adenylate kinase	Tb927.6.3210	6	6	6	54.2	54.2	54.2	20.223	0	20.569	161570000	23	6	5	6	5	4	4	6	6	6	5	6	5	4	4	6	6	6	5	6	5	4	4	6	6	177	177	54.2	48.6	54.2
	0.825351	0.149503	-0.0845828	0.943057	Tb927.11.5400:mRNA-p1	Tb927.11.5400:mRNA-p1	Tb927.11.5400:mRNA-p1 | transcript=Tb927.11.5400:mRNA | gene=Tb927.11.5400 | organism=Trypanosoma_brucei_brucei_TREU927 | gene_product=signal recognition particle 54 kDa | transcript_product=signal recognition particle 54 kDa | location=Tb927_11_v5.1:15356	signal recognition particle 54 kDa	Tb927.11.5400	18	18	18	48	48	48	53.374	0	65.28	640370000	72	17	17	17	16	15	16	18	18	17	17	17	16	15	16	18	18	17	17	17	16	15	16	18	18	487	487	42.3	45.8	46.4
	0.824765	0.149705	-0.305899	0.808938	Tb927.11.14360:mRNA-p1;Tb927.11.14350:mRNA-p1	Tb927.11.14360:mRNA-p1	Tb927.11.14360:mRNA-p1 | transcript=Tb927.11.14360:mRNA | gene=Tb927.11.14360 | organism=Trypanosoma_brucei_brucei_TREU927 | gene_product=mitochondrial carrier protein | transcript_product=mitochondrial carrier protein | location=Tb927_11_v5.1:3820805-3821	mitochondrial carrier protein	Tb927.11.14360	7	7	7	26.3	26.3	26.3	38.053	0	11.469	108450000	25	6	5	6	5	5	6	6	4	6	5	6	5	5	6	6	4	6	5	6	5	5	6	6	4	339	NaN	23.9	15.6	23.6
	0.8247	0.149727	-0.414971	0.750034	Tb927.10.4250:mRNA-p1	Tb927.10.4250:mRNA-p1	Tb927.10.4250:mRNA-p1 | transcript=Tb927.10.4250:mRNA | gene=Tb927.10.4250 | organism=Trypanosoma_brucei_brucei_TREU927 | gene_product=ADP-ribosylation factor-like 2, arl2 | transcript_product=ADP-ribosylation factor-like 2, arl2 | location=Tb927_10_v5.1:1	ADP-ribosylation factor-like 2	Tb927.10.4250	3	3	3	15.6	15.6	15.6	20.796	0.00072551	1.9945	16422000	2	1	3	3	1	2	0	2	3	1	3	3	1	2	0	2	3	1	3	3	1	2	0	2	3	186	186	3.8	15.6	15.6
	0.824425	0.149822	0.221231	1.16573	Tb927.8.5450:mRNA-p1	Tb927.8.5450:mRNA-p1	Tb927.8.5450:mRNA-p1 | transcript=Tb927.8.5450:mRNA | gene=Tb927.8.5450 | organism=Trypanosoma_brucei_brucei_TREU927 | gene_product=amino acid permease 24 | transcript_product=amino acid permease 24 | location=Tb927_08_v5.1:1614773-1616239(+) | protein_len	amino acid permease 24	Tb927.8.5450	1	1	1	1.8	1.8	1.8	52.89	0.0023866	1.7775	36577000	7	1	1	1	1	1	1	1	1	1	1	1	1	1	1	1	1	1	1	1	1	1	1	1	1	488	488	1.8	1.8	1.8
	0.823284	0.150216	-0.110749	0.926107	Tb927.11.14430:mRNA-p1	Tb927.11.14430:mRNA-p1	Tb927.11.14430:mRNA-p1 | transcript=Tb927.11.14430:mRNA | gene=Tb927.11.14430 | organism=Trypanosoma_brucei_brucei_TREU927 | gene_product=proteasome regulatory non-ATP-ase subunit | transcript_product=proteasome regulatory non-ATP-ase subunit | location=Tb	proteasome regulatory non-ATP-ase subunit	Tb927.11.14430	6	6	6	27	27	27	31.281	0	15.887	255630000	34	5	5	6	5	5	6	5	4	5	5	6	5	5	6	5	4	5	5	6	5	5	6	5	4	274	274	23.7	23.7	27
	0.822599	0.150453	-0.0726533	0.950888	Tb927.7.7410:mRNA-p1	Tb927.7.7410:mRNA-p1	Tb927.7.7410:mRNA-p1 | transcript=Tb927.7.7410:mRNA | gene=Tb927.7.7410 | organism=Trypanosoma_brucei_brucei_TREU927 | gene_product=Trans-2-enoyl-ACP reductase 2, putative | transcript_product=Trans-2-enoyl-ACP reductase 2, putative | location=Tb927_07_v5.	Trans-2-enoyl-ACP reductase 2	Tb927.7.7410	12	12	12	50.1	50.1	50.1	35.787	0	46.174	496050000	70	12	11	11	11	11	12	10	10	12	11	11	11	11	12	10	10	12	11	11	11	11	12	10	10	335	335	50.1	47.8	47.8
	0.821372	0.150879	-0.335109	0.792724	Tb927.7.6600:mRNA-p1	Tb927.7.6600:mRNA-p1	Tb927.7.6600:mRNA-p1 | transcript=Tb927.7.6600:mRNA | gene=Tb927.7.6600 | organism=Trypanosoma_brucei_brucei_TREU927 | gene_product=hypothetical protein, conserved | transcript_product=hypothetical protein, conserved | location=Tb927_07_v5.1:1803709-180451	hypothetical protein	Tb927.7.6600	2	2	2	9.3	9.3	9.3	29.311	0	4.9082	22898000	4	2	2	2	2	1	2	1	2	2	2	2	2	1	2	1	2	2	2	2	2	1	2	1	2	268	268	9.3	9.3	9.3
	0.820765	0.15109	0.0862775	1.06163	Tb927.8.6760:mRNA-p1	Tb927.8.6760:mRNA-p1	Tb927.8.6760:mRNA-p1 | transcript=Tb927.8.6760:mRNA | gene=Tb927.8.6760 | organism=Trypanosoma_brucei_brucei_TREU927 | gene_product=translationally-controlled tumor protein homolog, putative | transcript_product=translationally-controlled tumor protein hom	translationally-controlled tumor protein homolog	Tb927.8.6760	12	12	4	83.5	83.5	40	19.35	0	149.14	11673000000	161	11	12	12	12	11	12	12	12	11	12	12	12	11	12	12	12	3	4	4	4	4	4	4	4	170	170	65.3	83.5	83.5
	0.820185	0.151292	-0.265117	0.832131	Tb927.8.2720:mRNA-p1	Tb927.8.2720:mRNA-p1	Tb927.8.2720:mRNA-p1 | transcript=Tb927.8.2720:mRNA | gene=Tb927.8.2720 | organism=Trypanosoma_brucei_brucei_TREU927 | gene_product=Putative serine esterase (DUF676), putative | transcript_product=Putative serine esterase (DUF676), putative | location=Tb92	Putative serine esterase (DUF676)	Tb927.8.2720	3	3	3	11.9	11.9	11.9	45.091	0	10.766	41816000	10	1	3	3	1	1	2	1	2	1	3	3	1	1	2	1	2	1	3	3	1	1	2	1	2	413	413	4.4	11.9	11.9
	0.819661	0.151474	0.190388	1.14107	Tb927.1.3010:mRNA-p1	Tb927.1.3010:mRNA-p1	Tb927.1.3010:mRNA-p1 | transcript=Tb927.1.3010:mRNA | gene=Tb927.1.3010 | organism=Trypanosoma_brucei_brucei_TREU927 | gene_product=mRNA processing protein, putative | transcript_product=mRNA processing protein, putative | location=Tb927_01_v5.1:668792-669	mRNA processing protein	Tb927.1.3010	6	6	6	27.2	27.2	27.2	40.813	0	21.429	144220000	17	5	3	4	4	4	3	4	4	5	3	4	4	4	3	4	4	5	3	4	4	4	3	4	4	372	372	24.2	12.4	19.1
	0.819492	0.151533	-0.102026	0.931724	Tb927.2.5160:mRNA-p1	Tb927.2.5160:mRNA-p1	Tb927.2.5160:mRNA-p1 | transcript=Tb927.2.5160:mRNA | gene=Tb927.2.5160 | organism=Trypanosoma_brucei_brucei_TREU927 | gene_product=chaperone protein DnaJ, putative | transcript_product=chaperone protein DnaJ, putative | location=Tb927_02_v5.1:910854-91205	chaperone protein DnaJ	Tb927.2.5160	22	22	22	64.8	64.8	64.8	44.327	0	233.29	12661000000	353	22	22	22	22	22	22	22	22	22	22	22	22	22	22	22	22	22	22	22	22	22	22	22	22	400	400	64.8	64.8	64.8
	0.819423	0.151557	-0.110056	0.926552	Tb927.8.4890:mRNA-p1	Tb927.8.4890:mRNA-p1	Tb927.8.4890:mRNA-p1 | transcript=Tb927.8.4890:mRNA | gene=Tb927.8.4890 | organism=Trypanosoma_brucei_brucei_TREU927 | gene_product=pol-associated gene 1 | transcript_product=pol-associated gene 1 | location=Tb927_08_v5.1:1441902-1443230(-) | protein_lengt	pol-associated gene 1	Tb927.8.4890	14	14	14	36.4	36.4	36.4	49.202	0	80.407	1198000000	70	11	11	10	9	11	10	10	10	11	11	10	9	11	10	10	10	11	11	10	9	11	10	10	10	442	442	33.3	30.8	30.8
	0.819204	0.151634	-0.323768	0.798981	Tb927.1.1340:mRNA-p1	Tb927.1.1340:mRNA-p1	Tb927.1.1340:mRNA-p1 | transcript=Tb927.1.1340:mRNA | gene=Tb927.1.1340 | organism=Trypanosoma_brucei_brucei_TREU927 | gene_product=Quinonprotein alcohol dehydrogenase-like protein, putative | transcript_product=Quinonprotein alcohol dehydrogenase-like pro	Quinonprotein alcohol dehydrogenase-like protein	Tb927.1.1340	2	2	2	4.2	4.2	4.2	79.368	0.001918	1.8594	17165000	3	1	2	2	2	1	1	1	2	1	2	2	2	1	1	1	2	1	2	2	2	1	1	1	2	742	742	1.3	4.2	4.2
	0.817239	0.152321	-0.110913	0.926002	Tb927.4.1310:mRNA-p1	Tb927.4.1310:mRNA-p1	Tb927.4.1310:mRNA-p1 | transcript=Tb927.4.1310:mRNA | gene=Tb927.4.1310 | organism=Trypanosoma_brucei_brucei_TREU927 | gene_product=ZFP family member, putative | transcript_product=ZFP family member, putative | location=Tb927_04_v5.1:343280-344695(-) | pro	ZFP family member	Tb927.4.1310	8	8	8	20	20	20	53.646	0	19.733	160510000	37	8	7	6	7	7	7	7	7	8	7	6	7	7	7	7	7	8	7	6	7	7	7	7	7	471	471	20	20	15.9
	0.817233	0.152324	0.168392	1.12381	Tb927.2.3020:mRNA-p1	Tb927.2.3020:mRNA-p1	Tb927.2.3020:mRNA-p1 | transcript=Tb927.2.3020:mRNA | gene=Tb927.2.3020 | organism=Trypanosoma_brucei_brucei_TREU927 | gene_product=Component of motile flagella 76 | transcript_product=Component of motile flagella 76 | location=Tb927_02_v5.1:571241-574339(	Component of motile flagella 76	Tb927.2.3020	11	11	11	14.5	14.5	14.5	118.83	0	46.573	157030000	29	9	10	9	7	8	9	9	9	9	10	9	7	8	9	9	9	9	10	9	7	8	9	9	9	1032	1032	10.7	13.4	12.4
	0.814478	0.153293	0.0978684	1.07019	Tb927.9.6360:mRNA-p1;Tb927.9.6380:mRNA-p1;Tb927.9.6370:mRNA-p1	Tb927.9.6360:mRNA-p1;Tb927.9.6380:mRNA-p1;Tb927.9.6370:mRNA-p1	Tb927.9.6360:mRNA-p1 | transcript=Tb927.9.6360:mRNA | gene=Tb927.9.6360 | organism=Trypanosoma_brucei_brucei_TREU927 | gene_product=hypothetical protein, conserved | transcript_product=hypothetical protein, conserved | location=Tb927_09_v5.1:1043316-104475	hypothetical protein	Tb927.9.6360	7	7	7	19.8	19.8	19.8	52.586	0	52.554	187650000	48	7	7	7	5	4	5	5	6	7	7	7	5	4	5	5	6	7	7	7	5	4	5	5	6	479	NaN	19.8	19.8	19.8
	0.814432	0.153309	-0.126348	0.916148	Tb927.5.4060:mRNA-p1	Tb927.5.4060:mRNA-p1	Tb927.5.4060:mRNA-p1 | transcript=Tb927.5.4060:mRNA | gene=Tb927.5.4060 | organism=Trypanosoma_brucei_brucei_TREU927 | gene_product=Nicastrin, putative | transcript_product=Nicastrin, putative | location=Tb927_05_v5.1:1304726-1306879(-) | protein_length=71	Nicastrin	Tb927.5.4060	6	6	6	9.9	9.9	9.9	77.506	0	8.5636	100160000	12	5	4	4	4	5	5	4	5	5	4	4	4	5	5	4	5	5	4	4	4	5	5	4	5	717	717	8.5	7.3	7.3
	0.814136	0.153414	0.155594	1.11388	Tb927.10.7730:mRNA-p1	Tb927.10.7730:mRNA-p1	Tb927.10.7730:mRNA-p1 | transcript=Tb927.10.7730:mRNA | gene=Tb927.10.7730 | organism=Trypanosoma_brucei_brucei_TREU927 | gene_product=Domain of unknown function (DUF4496), putative | transcript_product=Domain of unknown function (DUF4496), putative | loca	Domain of unknown function (DUF4496)	Tb927.10.7730	5	5	5	14.6	14.6	14.6	43.472	0	6.7676	38001000	6	4	4	5	4	3	2	2	4	4	4	5	4	3	2	2	4	4	4	5	4	3	2	2	4	383	383	11.7	11.7	14.6
	0.81282	0.153879	-0.123359	0.918048	Tb927.6.1870:mRNA-p1	Tb927.6.1870:mRNA-p1	Tb927.6.1870:mRNA-p1 | transcript=Tb927.6.1870:mRNA | gene=Tb927.6.1870 | organism=Trypanosoma_brucei_brucei_TREU927 | gene_product=Eukaryotic translation initiation factor 4E-4 | transcript_product=Eukaryotic translation initiation factor 4E-4 | location=	Eukaryotic translation initiation factor 4E-4	Tb927.6.1870	14	14	14	45.9	45.9	45.9	46.541	0	48.414	770780000	76	12	13	11	11	11	11	13	13	12	13	11	11	11	11	13	13	12	13	11	11	11	11	13	13	427	427	41.2	43.3	36.5
	0.812434	0.154016	-0.0593729	0.959681	Tb927.10.2950:mRNA-p1	Tb927.10.2950:mRNA-p1	Tb927.10.2950:mRNA-p1 | transcript=Tb927.10.2950:mRNA | gene=Tb927.10.2950 | organism=Trypanosoma_brucei_brucei_TREU927 | gene_product=hypothetical protein, conserved | transcript_product=hypothetical protein, conserved | location=Tb927_10_v5.1:767024-7723	hypothetical protein	Tb927.10.2950	27	27	27	22	22	22	196.95	0	76.641	589640000	98	25	26	24	25	26	25	26	25	25	26	24	25	26	25	26	25	25	26	24	25	26	25	26	25	1787	1787	20.5	21.2	19.9
	0.812137	0.154121	-0.14288	0.905709	Tb927.7.650:mRNA-p1	Tb927.7.650:mRNA-p1	Tb927.7.650:mRNA-p1 | transcript=Tb927.7.650:mRNA | gene=Tb927.7.650 | organism=Trypanosoma_brucei_brucei_TREU927 | gene_product=Nucleolar protein 105 | transcript_product=Nucleolar protein 105 | location=Tb927_07_v5.1:134015-136969(-) | protein_length=984	Nucleolar protein 105	Tb927.7.650	12	12	12	17.5	17.5	17.5	105.93	0	40.217	200110000	36	8	10	10	9	9	11	10	11	8	10	10	9	9	11	10	11	8	10	10	9	9	11	10	11	984	984	11	13.2	12.4
	0.811385	0.154389	-0.0711675	0.951867	Tb927.5.3920:mRNA-p1	Tb927.5.3920:mRNA-p1	Tb927.5.3920:mRNA-p1 | transcript=Tb927.5.3920:mRNA | gene=Tb927.5.3920 | organism=Trypanosoma_brucei_brucei_TREU927 | gene_product=Peroxisome biogenesis factor 6 | transcript_product=Peroxisome biogenesis factor 6 | location=Tb927_05_v5.1:1273846-1276794(	Peroxisome biogenesis factor 6	Tb927.5.3920	8	8	8	13.1	13.1	13.1	106.05	0	29.525	102920000	34	7	7	8	7	6	8	6	7	7	7	8	7	6	8	6	7	7	7	8	7	6	8	6	7	982	982	11.5	11.5	13.1
	0.811339	0.154405	0.104926	1.07544	Tb927.2.4330:mRNA-p1;Tb11.v5.0777.1-p1	Tb927.2.4330:mRNA-p1;Tb11.v5.0777.1-p1	Tb927.2.4330:mRNA-p1 | transcript=Tb927.2.4330:mRNA | gene=Tb927.2.4330 | organism=Trypanosoma_brucei_brucei_TREU927 | gene_product=paraflagellar rod protein 5, putative | transcript_product=paraflagellar rod protein 5, putative | location=Tb927_02_v5.1:76	paraflagellar rod protein 5	Tb927.2.4330	26	26	26	42.8	42.8	42.8	87.142	0	100.13	2847900000	149	25	23	23	24	24	24	24	24	25	23	23	24	24	24	24	24	25	23	23	24	24	24	24	24	762	NaN	42.5	35.6	38.1
	0.809669	0.155	-0.0740414	0.949973	Tb927.9.15490:mRNA-p1	Tb927.9.15490:mRNA-p1	Tb927.9.15490:mRNA-p1 | transcript=Tb927.9.15490:mRNA | gene=Tb927.9.15490 | organism=Trypanosoma_brucei_brucei_TREU927 | gene_product=ADP-ribosylation factor GTPase activating protein, putative | transcript_product=ADP-ribosylation factor GTPase activatin	ADP-ribosylation factor GTPase activating protein	Tb927.9.15490	13	13	13	43.6	43.6	43.6	45.724	0	42.076	455680000	80	13	13	13	12	12	13	13	13	13	13	13	12	12	13	13	13	13	13	13	12	12	13	13	13	413	413	43.6	43.6	43.6
	0.807867	0.155644	-0.312544	0.805221	Tb927.11.8750:mRNA-p1	Tb927.11.8750:mRNA-p1	Tb927.11.8750:mRNA-p1 | transcript=Tb927.11.8750:mRNA | gene=Tb927.11.8750 | organism=Trypanosoma_brucei_brucei_TREU927 | gene_product=hypothetical protein, conserved | transcript_product=hypothetical protein, conserved | location=Tb927_11_v5.1:2407391-240	hypothetical protein	Tb927.11.8750	2	2	2	22	22	22	14.537	0	7.0311	66059000	9	2	2	2	1	2	2	2	1	2	2	2	1	2	2	2	1	2	2	2	1	2	2	2	1	132	132	22	22	22
	0.807853	0.155649	0.0603609	1.04273	Tb927.3.1840:mRNA-p1	Tb927.3.1840:mRNA-p1	Tb927.3.1840:mRNA-p1 | transcript=Tb927.3.1840:mRNA | gene=Tb927.3.1840 | organism=Trypanosoma_brucei_brucei_TREU927 | gene_product=3-oxo-5-alpha-steroid 4-dehydrogenase, putative | transcript_product=3-oxo-5-alpha-steroid 4-dehydrogenase, putative | locat	3-oxo-5-alpha-steroid 4-dehydrogenase	Tb927.3.1840	17	17	17	40.9	40.9	40.9	33.355	0	132.99	4516400000	135	17	16	17	16	17	16	16	17	17	16	17	16	17	16	16	17	17	16	17	16	17	16	16	17	298	298	40.9	40.6	40.9
	0.807417	0.155806	-0.0984635	0.934027	Tb927.11.4190:mRNA-p1	Tb927.11.4190:mRNA-p1	Tb927.11.4190:mRNA-p1 | transcript=Tb927.11.4190:mRNA | gene=Tb927.11.4190 | organism=Trypanosoma_brucei_brucei_TREU927 | gene_product=Metallopeptidase family M24, putative | transcript_product=Metallopeptidase family M24, putative | location=Tb927_11_v5.1	Metallopeptidase family M24	Tb927.11.4190	11	11	11	30.1	30.1	30.1	59.057	0	35.313	434230000	69	11	10	10	11	11	11	11	10	11	10	10	11	11	11	11	10	11	10	10	11	11	11	11	10	538	538	30.1	28.3	28.3
	0.807286	0.155853	-0.258772	0.835799	Tb927.11.7160:mRNA-p1	Tb927.11.7160:mRNA-p1	Tb927.11.7160:mRNA-p1 | transcript=Tb927.11.7160:mRNA | gene=Tb927.11.7160 | organism=Trypanosoma_brucei_brucei_TREU927 | gene_product=cdc2-related kinase 8, putative | transcript_product=cdc2-related kinase 8, putative | location=Tb927_11_v5.1:2004513-200	cdc2-related kinase 8	Tb927.11.7160	1	1	1	3.8	3.8	3.8	45.321	0	3.0222	17837000	5	1	1	1	1	1	1	1	1	1	1	1	1	1	1	1	1	1	1	1	1	1	1	1	1	398	398	3.8	3.8	3.8
	0.806805	0.156025	0.404431	1.32357	Tb927.11.11075:mRNA-p1	Tb927.11.11075:mRNA-p1	Tb927.11.11075:mRNA-p1 | transcript=Tb927.11.11075:mRNA | gene=Tb927.11.11075 | organism=Trypanosoma_brucei_brucei_TREU927 | gene_product=hypothetical protein | transcript_product=hypothetical protein | location=Tb927_11_v5.1:2966156-2966548(+) | protein_l	hypothetical protein	Tb927.11.11075	2	2	2	14.6	14.6	14.6	14.869	0.0030682	1.6222	8797900	3	1	1	2	1	1	2	1	1	1	1	2	1	1	2	1	1	1	1	2	1	1	2	1	1	130	130	6.9	6.9	14.6
	0.806025	0.156306	-0.135096	0.910609	Tb927.2.4160:mRNA-p1	Tb927.2.4160:mRNA-p1	Tb927.2.4160:mRNA-p1 | transcript=Tb927.2.4160:mRNA | gene=Tb927.2.4160 | organism=Trypanosoma_brucei_brucei_TREU927 | gene_product=hypothetical protein, conserved | transcript_product=hypothetical protein, conserved | location=Tb927_02_v5.1:730705-733212(	hypothetical protein	Tb927.2.4160	7	7	7	11	11	11	92.648	0	12.197	112750000	25	7	6	5	6	5	6	7	7	7	6	5	6	5	6	7	7	7	6	5	6	5	6	7	7	835	835	11	9.5	7.9
	0.805938	0.156337	-0.105214	0.929667	Tb927.5.2530:mRNA-p1	Tb927.5.2530:mRNA-p1	Tb927.5.2530:mRNA-p1 | transcript=Tb927.5.2530:mRNA | gene=Tb927.5.2530 | organism=Trypanosoma_brucei_brucei_TREU927 | gene_product=RNA cytidine acetyltransferase | transcript_product=RNA cytidine acetyltransferase | location=Tb927_05_v5.1:874561-877680(+)	RNA cytidine acetyltransferase	Tb927.5.2530	17	17	17	25.1	25.1	25.1	114.91	0	42.335	401170000	72	15	15	15	16	15	16	15	15	15	15	15	16	15	16	15	15	15	15	15	16	15	16	15	15	1039	1039	22.7	22.8	22.7
	0.804842	0.156732	-0.148807	0.901996	Tb927.4.1600:mRNA-p1	Tb927.4.1600:mRNA-p1	Tb927.4.1600:mRNA-p1 | transcript=Tb927.4.1600:mRNA | gene=Tb927.4.1600 | organism=Trypanosoma_brucei_brucei_TREU927 | gene_product=AAA domain containing protein, putative | transcript_product=AAA domain containing protein, putative | location=Tb927_04_v5.	AAA domain containing protein	Tb927.4.1600	4	4	4	18.4	18.4	18.4	27.063	0	15.333	130040000	31	3	4	4	4	4	4	4	4	3	4	4	4	4	4	4	4	3	4	4	4	4	4	4	4	234	234	15.4	18.4	18.4
	0.804656	0.156799	-0.0585723	0.960214	Tb927.8.4820:mRNA-p1;Tb11.v5.0659.1-p1	Tb927.8.4820:mRNA-p1;Tb11.v5.0659.1-p1	Tb927.8.4820:mRNA-p1 | transcript=Tb927.8.4820:mRNA | gene=Tb927.8.4820 | organism=Trypanosoma_brucei_brucei_TREU927 | gene_product=eukaryotic translation initiation factor 4 gamma 3 | transcript_product=eukaryotic translation initiation factor 4 gamma 3 |	eukaryotic translation initiation factor 4 gamma 3	Tb927.8.4820	20	20	20	44.1	44.1	44.1	69.338	0	71.876	840410000	107	19	19	18	18	18	17	19	18	19	19	18	18	18	17	19	18	19	19	18	18	18	17	19	18	622	NaN	42.8	42	37.8
	0.804379	0.156899	-0.190438	0.87634	Tb927.8.7470:mRNA-p1	Tb927.8.7470:mRNA-p1	Tb927.8.7470:mRNA-p1 | transcript=Tb927.8.7470:mRNA | gene=Tb927.8.7470 | organism=Trypanosoma_brucei_brucei_TREU927 | gene_product=hypothetical protein, conserved | transcript_product=hypothetical protein, conserved | location=Tb927_08_v5.1:2150481-215219	hypothetical protein	Tb927.8.7470	4	4	1	10.7	10.7	4	61.342	0	19.227	79679000	26	4	4	4	4	4	4	4	4	4	4	4	4	4	4	4	4	1	1	1	1	1	1	1	1	570	570	10.7	10.7	10.7
	0.803727	0.157135	-0.0444884	0.969634	Tb927.7.5560:mRNA-p1	Tb927.7.5560:mRNA-p1	Tb927.7.5560:mRNA-p1 | transcript=Tb927.7.5560:mRNA | gene=Tb927.7.5560 | organism=Trypanosoma_brucei_brucei_TREU927 | gene_product=glucosamine-fructose-6-phosphate aminotransferase, putative | transcript_product=glucosamine-fructose-6-phosphate aminotrans	glucosamine-fructose-6-phosphate aminotransferase	Tb927.7.5560	14	14	14	31.7	31.7	31.7	71.523	0	64.905	461670000	86	14	13	13	12	13	14	12	14	14	13	13	12	13	14	12	14	14	13	13	12	13	14	12	14	659	659	31.7	30.2	27.8
	0.80334	0.157275	-0.0978079	0.934452	Tb927.10.3500:mRNA-p1	Tb927.10.3500:mRNA-p1	Tb927.10.3500:mRNA-p1 | transcript=Tb927.10.3500:mRNA | gene=Tb927.10.3500 | organism=Trypanosoma_brucei_brucei_TREU927 | gene_product=splicing factor u2af 65 kda subunit | transcript_product=splicing factor u2af 65 kda subunit | location=Tb927_10_v5.1:899	splicing factor u2af 65 kda subunit	Tb927.10.3500	11	11	11	18.1	18.1	18.1	96.56	0	39.273	337880000	65	10	10	8	11	9	11	11	11	10	10	8	11	9	11	11	11	10	10	8	11	9	11	11	11	878	878	16.7	15.3	11.5
	0.803151	0.157344	-0.213015	0.862732	Tb927.3.5330:mRNA-p1	Tb927.3.5330:mRNA-p1	Tb927.3.5330:mRNA-p1 | transcript=Tb927.3.5330:mRNA | gene=Tb927.3.5330 | organism=Trypanosoma_brucei_brucei_TREU927 | gene_product=centaurin beta 5 | transcript_product=centaurin beta 5 | location=Tb927_03_v5.1:1497803-1498630(+) | protein_length=275 | se	centaurin beta 5	Tb927.3.5330	3	3	3	17.8	17.8	17.8	31.232	0	12.532	31836000	7	1	2	3	1	1	1	1	2	1	2	3	1	1	1	1	2	1	2	3	1	1	1	1	2	275	275	8.4	12	17.8
	0.802654	0.157524	-0.108707	0.927419	Tb927.10.14530:mRNA-p1	Tb927.10.14530:mRNA-p1	Tb927.10.14530:mRNA-p1 | transcript=Tb927.10.14530:mRNA | gene=Tb927.10.14530 | organism=Trypanosoma_brucei_brucei_TREU927 | gene_product=19S proteasome non-atpase subunit 8 | transcript_product=19S proteasome non-atpase subunit 8 | location=Tb927_10_v5.1:	19S proteasome non-atpase subunit 8	Tb927.10.14530	10	10	10	39.6	39.6	39.6	42.35	0	82.183	1498000000	73	10	9	10	10	10	10	9	9	10	9	10	10	10	10	9	9	10	9	10	10	10	10	9	9	381	381	39.6	36.2	39.6
	0.80249	0.157583	-0.157056	0.896853	Tb927.7.5760:mRNA-p1	Tb927.7.5760:mRNA-p1	Tb927.7.5760:mRNA-p1 | transcript=Tb927.7.5760:mRNA | gene=Tb927.7.5760 | organism=Trypanosoma_brucei_brucei_TREU927 | gene_product=nuclear transport factor 2 protein, putative | transcript_product=nuclear transport factor 2 protein, putative | location=Tb	nuclear transport factor 2 protein	Tb927.7.5760	5	5	5	54.1	54.1	54.1	15.812	0	44.343	422890000	31	5	5	5	5	5	5	5	5	5	5	5	5	5	5	5	5	5	5	5	5	5	5	5	5	135	135	54.1	54.1	54.1
	0.800875	0.15817	-0.183468	0.880584	Tb927.7.1080:mRNA-p1	Tb927.7.1080:mRNA-p1	Tb927.7.1080:mRNA-p1 | transcript=Tb927.7.1080:mRNA | gene=Tb927.7.1080 | organism=Trypanosoma_brucei_brucei_TREU927 | gene_product=hypothetical protein, conserved | transcript_product=hypothetical protein, conserved | location=Tb927_07_v5.1:275408-276490(	hypothetical protein	Tb927.7.1080	9	9	9	32.5	32.5	32.5	40.968	0	19.757	176820000	30	8	7	8	8	7	8	9	8	8	7	8	8	7	8	9	8	8	7	8	8	7	8	9	8	360	360	28.1	26.7	28.1
	0.800121	0.158445	-0.231514	0.85174	Tb927.11.2860:mRNA-p1	Tb927.11.2860:mRNA-p1	Tb927.11.2860:mRNA-p1 | transcript=Tb927.11.2860:mRNA | gene=Tb927.11.2860 | organism=Trypanosoma_brucei_brucei_TREU927 | gene_product=hypothetical protein, conserved | transcript_product=hypothetical protein, conserved | location=Tb927_11_v5.1:840110-8424	hypothetical protein	Tb927.11.2860	6	6	6	9.8	9.8	9.8	83.077	0	11.698	77331000	15	5	5	4	6	5	6	5	4	5	5	4	6	5	6	5	4	5	5	4	6	5	6	5	4	769	769	8.7	8.7	6.1
	0.798303	0.15911	0.229056	1.17207	Tb927.8.7700:mRNA-p1;Tb927.8.7680:mRNA-p1	Tb927.8.7700:mRNA-p1;Tb927.8.7680:mRNA-p1	Tb927.8.7700:mRNA-p1 | transcript=Tb927.8.7700:mRNA | gene=Tb927.8.7700 | organism=Trypanosoma_brucei_brucei_TREU927 | gene_product=amino acid transporter, putative | transcript_product=amino acid transporter, putative | location=Tb927_08_v5.1:2216565-2218	amino acid transporter	Tb927.8.7700	4	3	3	16.2	14.4	14.4	51.74	0.00049764	2.4122	68795000	7	4	4	4	4	4	4	4	4	3	3	3	3	3	3	3	3	3	3	3	3	3	3	3	3	487	NaN	16.2	16.2	16.2
	0.797973	0.159231	-0.200413	0.870302	Tb927.10.6410:mRNA-p1	Tb927.10.6410:mRNA-p1	Tb927.10.6410:mRNA-p1 | transcript=Tb927.10.6410:mRNA | gene=Tb927.10.6410 | organism=Trypanosoma_brucei_brucei_TREU927 | gene_product=DNA mismatch repair protein MSH6, putative | transcript_product=DNA mismatch repair protein MSH6, putative | location=Tb9	DNA mismatch repair protein MSH6	Tb927.10.6410	5	5	5	7.2	7.2	7.2	110.32	0	9.8277	2467400000	11	5	4	5	4	5	4	5	3	5	4	5	4	5	4	5	3	5	4	5	4	5	4	5	3	997	997	7.2	5.8	7.2
	0.797458	0.15942	0.10025	1.07196	Tb927.10.13510:mRNA-p1	Tb927.10.13510:mRNA-p1	Tb927.10.13510:mRNA-p1 | transcript=Tb927.10.13510:mRNA | gene=Tb927.10.13510 | organism=Trypanosoma_brucei_brucei_TREU927 | gene_product=zinc metallopeptidase, putative | transcript_product=zinc metallopeptidase, putative | location=Tb927_10_v5.1:3296931-	zinc metallopeptidase	Tb927.10.13510	9	9	9	19.9	19.9	19.9	62.779	0	25.836	153310000	38	7	7	5	7	6	8	6	5	7	7	5	7	6	8	6	5	7	7	5	7	6	8	6	5	569	569	16.7	16.7	13.9
	0.797074	0.159561	-0.322334	0.799775	Tb927.1.1100:mRNA-p1	Tb927.1.1100:mRNA-p1	Tb927.1.1100:mRNA-p1 | transcript=Tb927.1.1100:mRNA | gene=Tb927.1.1100 | organism=Trypanosoma_brucei_brucei_TREU927 | gene_product=Basal body protein | transcript_product=Basal body protein | location=Tb927_01_v5.1:308704-311616(+) | protein_length=970 |	Basal body protein	Tb927.1.1100	4	4	4	5.2	5.2	5.2	108.81	0	3.3711	42611000	11	3	4	3	3	2	3	3	4	3	4	3	3	2	3	3	4	3	4	3	3	2	3	3	4	970	970	4	5.2	3.4
	0.796634	0.159722	-0.262376	0.833714	Tb927.8.6190:mRNA-p1	Tb927.8.6190:mRNA-p1	Tb927.8.6190:mRNA-p1 | transcript=Tb927.8.6190:mRNA | gene=Tb927.8.6190 | organism=Trypanosoma_brucei_brucei_TREU927 | gene_product=BolA-like protein, putative | transcript_product=BolA-like protein, putative | location=Tb927_08_v5.1:1801629-1801892(+) | p	BolA-like protein	Tb927.8.6190	1	1	1	16.1	16.1	16.1	9.6682	0.00096502	1.9755	27803000	8	1	1	1	1	1	1	1	1	1	1	1	1	1	1	1	1	1	1	1	1	1	1	1	1	87	87	16.1	16.1	16.1
	0.794893	0.160364	-0.118721	0.921003	Tb927.11.4290:mRNA-p1	Tb927.11.4290:mRNA-p1	Tb927.11.4290:mRNA-p1 | transcript=Tb927.11.4290:mRNA | gene=Tb927.11.4290 | organism=Trypanosoma_brucei_brucei_TREU927 | gene_product=40S ribosomal protein S12 | transcript_product=40S ribosomal protein S12 | location=Tb927_11_v5.1:1253083-1253517(-) | pr	40S ribosomal protein S12	Tb927.11.4290	8	8	8	64.6	64.6	64.6	15.869	0	46.808	670360000	64	7	7	8	7	8	7	7	8	7	7	8	7	8	7	7	8	7	7	8	7	8	7	7	8	144	144	58.3	58.3	64.6
	0.794745	0.160419	-0.082427	0.944467	Tb927.11.16480:mRNA-p1	Tb927.11.16480:mRNA-p1	Tb927.11.16480:mRNA-p1 | transcript=Tb927.11.16480:mRNA | gene=Tb927.11.16480 | organism=Trypanosoma_brucei_brucei_TREU927 | gene_product=enoyl-CoA hydratase/isomerase family protein, putative | transcript_product=enoyl-CoA hydratase/isomerase family prote	enoyl-CoA hydratase/isomerase family protein	Tb927.11.16480	13	13	13	53.3	53.3	53.3	40.234	0	51.418	482520000	45	11	10	11	11	11	10	11	10	11	10	11	11	11	10	11	10	11	10	11	11	11	10	11	10	362	362	44.2	38.4	48.3
	0.794586	0.160478	-0.0882754	0.940647	Tb927.10.8060:mRNA-p1	Tb927.10.8060:mRNA-p1	Tb927.10.8060:mRNA-p1 | transcript=Tb927.10.8060:mRNA | gene=Tb927.10.8060 | organism=Trypanosoma_brucei_brucei_TREU927 | gene_product=SET domain containing protein, putative | transcript_product=SET domain containing protein, putative | location=Tb927_10_	SET domain containing protein	Tb927.10.8060	14	14	14	38.9	38.9	38.9	51.643	0	69.105	596860000	68	14	14	13	14	14	14	13	14	14	14	13	14	14	14	13	14	14	14	13	14	14	14	13	14	457	457	38.9	38.9	36.5
	0.794556	0.160488	-0.112992	0.924669	Tb927.11.7290:mRNA-p1;Tb11.v5.0254.1-p1	Tb927.11.7290:mRNA-p1;Tb11.v5.0254.1-p1	Tb927.11.7290:mRNA-p1 | transcript=Tb927.11.7290:mRNA | gene=Tb927.11.7290 | organism=Trypanosoma_brucei_brucei_TREU927 | gene_product=pantothenate kinase subunit, putative | transcript_product=pantothenate kinase subunit, putative | location=Tb927_11_v5.1	pantothenate kinase subunit	Tb927.11.7290	16	16	16	15.6	15.6	15.6	162.1	0	41.668	324470000	56	14	15	15	16	15	16	14	15	14	15	15	16	15	16	14	15	14	15	15	16	15	16	14	15	1467	NaN	13	14.5	14.5
	0.794278	0.160591	0.308805	1.23868	Tb927.5.1870:mRNA-p1	Tb927.5.1870:mRNA-p1	Tb927.5.1870:mRNA-p1 | transcript=Tb927.5.1870:mRNA | gene=Tb927.5.1870 | organism=Trypanosoma_brucei_brucei_TREU927 | gene_product=Fidgetin, putative | transcript_product=Fidgetin, putative | location=Tb927_05_v5.1:637462-640125(+) | protein_length=887 |	Fidgetin	Tb927.5.1870	3	3	3	5.6	5.6	5.6	96.728	0	6.0332	36314000	8	3	3	3	3	3	3	2	3	3	3	3	3	3	3	2	3	3	3	3	3	3	3	2	3	887	887	5.6	5.6	5.6
	0.794172	0.160631	-0.398324	0.758739	Tb927.11.14990:mRNA-p1	Tb927.11.14990:mRNA-p1	Tb927.11.14990:mRNA-p1 | transcript=Tb927.11.14990:mRNA | gene=Tb927.11.14990 | organism=Trypanosoma_brucei_brucei_TREU927 | gene_product=hypothetical protein, conserved | transcript_product=hypothetical protein, conserved | location=Tb927_11_v5.1:3988190-	hypothetical protein	Tb927.11.14990	1	1	1	3.8	3.8	3.8	67.377	0.0046577	1.4112	11602000	1	1	1	0	1	1	1	1	0	1	1	0	1	1	1	1	0	1	1	0	1	1	1	1	0	602	602	3.8	3.8	0
	0.793366	0.160929	-0.0820117	0.944739	Tb927.11.4180:mRNA-p1	Tb927.11.4180:mRNA-p1	Tb927.11.4180:mRNA-p1 | transcript=Tb927.11.4180:mRNA | gene=Tb927.11.4180 | organism=Trypanosoma_brucei_brucei_TREU927 | gene_product=PSP1 C-terminal conserved region, putative | transcript_product=PSP1 C-terminal conserved region, putative | location=Tb9	PSP1 C-terminal conserved region	Tb927.11.4180	8	8	8	23.1	23.1	23.1	55.629	0	29.268	261400000	47	8	8	7	8	8	8	7	7	8	8	7	8	8	8	7	7	8	8	7	8	8	8	7	7	507	507	23.1	23.1	20.9
	0.790943	0.161829	-0.159038	0.895622	Tb927.8.4450:mRNA-p1	Tb927.8.4450:mRNA-p1	Tb927.8.4450:mRNA-p1 | transcript=Tb927.8.4450:mRNA | gene=Tb927.8.4450 | organism=Trypanosoma_brucei_brucei_TREU927 | gene_product=RNA-binding protein, putative | transcript_product=RNA-binding protein, putative | location=Tb927_08_v5.1:1319509-1320795(-)	RNA-binding protein	Tb927.8.4450	6	6	6	18.2	18.2	18.2	47.214	0	24.099	305030000	30	5	6	6	5	5	5	5	6	5	6	6	5	5	5	5	6	5	6	6	5	5	5	5	6	428	428	15.2	18.2	18.2
	0.790421	0.162024	-0.136354	0.909815	Tb927.4.1340:mRNA-p1	Tb927.4.1340:mRNA-p1	Tb927.4.1340:mRNA-p1 | transcript=Tb927.4.1340:mRNA | gene=Tb927.4.1340 | organism=Trypanosoma_brucei_brucei_TREU927 | gene_product=Cleavage and polyadenylation specificity factor subunit | transcript_product=Cleavage and polyadenylation specificity factor	Cleavage and polyadenylation specificity factor subunit	Tb927.4.1340	15	15	15	28.6	28.6	28.6	85.313	0	52.865	441170000	81	14	15	15	14	15	13	15	15	14	15	15	14	15	13	15	15	14	15	15	14	15	13	15	15	770	770	27.5	28.6	28.6
	0.78967	0.162304	-0.215099	0.861487	Tb927.3.1620:mRNA-p1	Tb927.3.1620:mRNA-p1	Tb927.3.1620:mRNA-p1 | transcript=Tb927.3.1620:mRNA | gene=Tb927.3.1620 | organism=Trypanosoma_brucei_brucei_TREU927 | gene_product=ER-golgi trafficking TRAPP I complex 85 kDa subunit, putative | transcript_product=ER-golgi trafficking TRAPP I complex 85 k	ER-golgi trafficking TRAPP I complex 85 kDa subunit	Tb927.3.1620	5	5	5	3.9	3.9	3.9	178.11	0	17.166	108330000	17	4	4	5	4	4	4	4	4	4	4	5	4	4	4	4	4	4	4	5	4	4	4	4	4	1631	1631	3.3	2.8	3.9
	0.789491	0.162371	-0.161848	0.89388	Tb927.7.5890:mRNA-p1	Tb927.7.5890:mRNA-p1	Tb927.7.5890:mRNA-p1 | transcript=Tb927.7.5890:mRNA | gene=Tb927.7.5890 | organism=Trypanosoma_brucei_brucei_TREU927 | gene_product=hypothetical protein, conserved | transcript_product=hypothetical protein, conserved | location=Tb927_07_v5.1:1582960-158496	hypothetical protein	Tb927.7.5890	2	2	2	4.5	4.5	4.5	73.556	0.00072499	1.9902	30086000	7	2	2	2	2	2	2	2	2	2	2	2	2	2	2	2	2	2	2	2	2	2	2	2	2	666	666	4.5	4.5	4.5
	0.78841	0.162776	-0.258849	0.835755	Tb927.10.3770:mRNA-p1	Tb927.10.3770:mRNA-p1	Tb927.10.3770:mRNA-p1 | transcript=Tb927.10.3770:mRNA | gene=Tb927.10.3770 | organism=Trypanosoma_brucei_brucei_TREU927 | gene_product=predicted TPR repeat protein | transcript_product=predicted TPR repeat protein | location=Tb927_10_v5.1:978432-980534(-)	predicted TPR repeat protein	Tb927.10.3770	2	2	2	3.3	3.3	3.3	78.604	0.00049213	2.2589	7511000	7	0	2	1	1	1	1	1	1	0	2	1	1	1	1	1	1	0	2	1	1	1	1	1	1	700	700	0	3.3	1.9
	0.787916	0.162961	-0.177711	0.884105	Tb927.11.10480:mRNA-p1	Tb927.11.10480:mRNA-p1	Tb927.11.10480:mRNA-p1 | transcript=Tb927.11.10480:mRNA | gene=Tb927.11.10480 | organism=Trypanosoma_brucei_brucei_TREU927 | gene_product=PQQ-like domain/WD domain, G-beta repeat/Utp21 specific WD40 associated putative domain containing protein, putative |	PQQ-like domain/WD domain	Tb927.11.10480	9	9	9	16.5	16.5	16.5	106.94	0	39.66	221690000	23	5	8	7	8	5	6	8	7	5	8	7	8	5	6	8	7	5	8	7	8	5	6	8	7	975	975	11.2	13.4	13.9
	0.787612	0.163075	-0.0494499	0.966305	Tb927.11.14300:mRNA-p1	Tb927.11.14300:mRNA-p1	Tb927.11.14300:mRNA-p1 | transcript=Tb927.11.14300:mRNA | gene=Tb927.11.14300 | organism=Trypanosoma_brucei_brucei_TREU927 | gene_product=Dynein intermediate chain, axonemal | transcript_product=Dynein intermediate chain, axonemal | location=Tb927_11_v5.1:	Dynein intermediate chain	Tb927.11.14300	27	27	26	60.5	60.5	59.3	68.115	0	226.67	3256800000	215	26	26	26	26	26	26	26	25	26	26	26	26	26	26	26	25	25	25	25	25	25	25	25	24	602	602	59	58.3	59
	0.786972	0.163316	0.188089	1.13925	Tb927.9.12150:mRNA-p1	Tb927.9.12150:mRNA-p1	Tb927.9.12150:mRNA-p1 | transcript=Tb927.9.12150:mRNA | gene=Tb927.9.12150 | organism=Trypanosoma_brucei_brucei_TREU927 | gene_product=transport protein particle (TRAPP) subunit, putative | transcript_product=transport protein particle (TRAPP) subunit, put	transport protein particle (TRAPP) subunit	Tb927.9.12150	4	4	4	20.8	20.8	20.8	23.01	0	9.2525	102340000	18	4	3	4	3	3	3	4	3	4	3	4	3	3	3	4	3	4	3	4	3	3	3	4	3	202	202	20.8	15.3	20.8
	0.786207	0.163604	-0.0479012	0.967343	Tb927.7.4460:mRNA-p1	Tb927.7.4460:mRNA-p1	Tb927.7.4460:mRNA-p1 | transcript=Tb927.7.4460:mRNA | gene=Tb927.7.4460 | organism=Trypanosoma_brucei_brucei_TREU927 | gene_product=von Willebrand factor type A domain containing protein, putative | transcript_product=von Willebrand factor type A domain co	von Willebrand factor type A domain containing protein	Tb927.7.4460	16	16	16	25.8	25.8	25.8	91.199	0	51.394	949930000	121	14	14	15	13	15	14	14	15	14	14	15	13	15	14	14	15	14	14	15	13	15	14	14	15	842	842	23.8	23.8	24.7
	0.785681	0.163802	-0.160069	0.894983	Tb927.8.7210:mRNA-p1	Tb927.8.7210:mRNA-p1	Tb927.8.7210:mRNA-p1 | transcript=Tb927.8.7210:mRNA | gene=Tb927.8.7210 | organism=Trypanosoma_brucei_brucei_TREU927 | gene_product=hypothetical protein, conserved | transcript_product=hypothetical protein, conserved | location=Tb927_08_v5.1:2071616-207206	hypothetical protein	Tb927.8.7210	3	3	3	30.2	30.2	30.2	16.908	0	13.423	64893000	19	3	3	2	3	3	3	3	3	3	3	2	3	3	3	3	3	3	3	2	3	3	3	3	3	149	149	30.2	30.2	19.5
	0.785001	0.164059	-1.76542	0.294142	Tb927.9.9200:mRNA-p1	Tb927.9.9200:mRNA-p1	Tb927.9.9200:mRNA-p1 | transcript=Tb927.9.9200:mRNA | gene=Tb927.9.9200 | organism=Trypanosoma_brucei_brucei_TREU927 | gene_product=alpha-1,2-mannosyltransferase, putative | transcript_product=alpha-1,2-mannosyltransferase, putative | location=Tb927_09_v5.	alpha-1	Tb927.9.9200	3	3	3	7.2	7.2	7.2	52.383	0	3.456	41216000	7	0	2	1	2	3	2	0	2	0	2	1	2	3	2	0	2	0	2	1	2	3	2	0	2	470	470	0	5.3	2.3
	0.783523	0.164618	0.206845	1.15416	Tb927.2.5010:mRNA-p1	Tb927.2.5010:mRNA-p1	Tb927.2.5010:mRNA-p1 | transcript=Tb927.2.5010:mRNA | gene=Tb927.2.5010 | organism=Trypanosoma_brucei_brucei_TREU927 | gene_product=Meiotic cell cortex C-terminal pleckstrin homology, putative | transcript_product=Meiotic cell cortex C-terminal pleckstrin	Meiotic cell cortex C-terminal pleckstrin homology	Tb927.2.5010	6	6	6	13.8	13.8	13.8	55.098	0	9.4781	181680000	14	4	4	5	6	6	5	5	5	4	4	5	6	6	5	5	5	4	4	5	6	6	5	5	5	500	500	9.6	9.6	11.8
	0.782795	0.164894	-0.109568	0.926865	Tb927.10.10620:mRNA-p1	Tb927.10.10620:mRNA-p1	Tb927.10.10620:mRNA-p1 | transcript=Tb927.10.10620:mRNA | gene=Tb927.10.10620 | organism=Trypanosoma_brucei_brucei_TREU927 | gene_product=hypothetical protein, conserved | transcript_product=hypothetical protein, conserved | location=Tb927_10_v5.1:2587958-	hypothetical protein	Tb927.10.10620	5	5	5	23.3	23.3	23.3	33.272	0	13.52	59370000	24	4	4	4	3	4	5	5	3	4	4	4	3	4	5	5	3	4	4	4	3	4	5	5	3	296	296	20.6	18.6	18.6
	0.782712	0.164925	-0.0760326	0.948663	Tb927.9.5210:mRNA-p1	Tb927.9.5210:mRNA-p1	Tb927.9.5210:mRNA-p1 | transcript=Tb927.9.5210:mRNA | gene=Tb927.9.5210 | organism=Trypanosoma_brucei_brucei_TREU927 | gene_product=glutaminyl-tRNA synthetase, putative | transcript_product=glutaminyl-tRNA synthetase, putative | location=Tb927_09_v5.1:9186	glutaminyl-tRNA synthetase	Tb927.9.5210	22	22	22	41.6	41.6	41.6	67.278	0	77.162	2095000000	160	20	22	22	19	20	19	19	21	20	22	22	19	20	19	19	21	20	22	22	19	20	19	19	21	577	577	38	41.6	41.6
	0.782278	0.165091	0.0374231	1.02628	Tb927.10.15530:mRNA-p1;Tb11.v5.0748.1-p1	Tb927.10.15530:mRNA-p1;Tb11.v5.0748.1-p1	Tb927.10.15530:mRNA-p1 | transcript=Tb927.10.15530:mRNA | gene=Tb927.10.15530 | organism=Trypanosoma_brucei_brucei_TREU927 | gene_product=ABC transport system ATP-binding protein, putative | transcript_product=ABC transport system ATP-binding protein, puta	ABC transport system ATP-binding protein	Tb927.10.15530	23	23	23	43.5	43.5	43.5	67.522	0	106.59	1092400000	160	22	22	22	23	22	21	22	22	22	22	22	23	22	21	22	22	22	22	22	23	22	21	22	22	602	NaN	42.2	42.2	42.2
	0.781958	0.165212	-0.588511	0.665029	Tb11.02.5430b.1-p1;Tb11.02.5430:mRNA-p1	Tb11.02.5430b.1-p1;Tb11.02.5430:mRNA-p1	Tb11.02.5430b.1-p1 | transcript=Tb11.02.5430b.1 | gene=Tb11.02.5430b | organism=Trypanosoma_brucei_brucei_TREU927 | gene_product=hypothetical protein, conserved | transcript_product=hypothetical protein, conserved | location=Tb927_11_bin_v5.1:664844-666076	hypothetical protein	Tb11.02.5430b	4	4	4	12.4	12.4	12.4	44.407	0	6.0794	36197000	7	1	2	3	3	1	1	4	4	1	2	3	3	1	1	4	4	1	2	3	3	1	1	4	4	410	NaN	2.9	6.3	9
	0.780561	0.165744	-0.116335	0.922528	Tb927.10.7500:mRNA-p1	Tb927.10.7500:mRNA-p1	Tb927.10.7500:mRNA-p1 | transcript=Tb927.10.7500:mRNA | gene=Tb927.10.7500 | organism=Trypanosoma_brucei_brucei_TREU927 | gene_product=fibrillarin | transcript_product=fibrillarin | location=Tb927_10_v5.1:1884735-1885637(-) | protein_length=300 | sequence_	fibrillarin	Tb927.10.7500	13	13	13	58	58	58	31.643	0	69.816	1543400000	102	13	12	13	13	13	13	13	13	13	12	13	13	13	13	13	13	13	12	13	13	13	13	13	13	300	300	58	47	58
	0.780335	0.165831	-0.131852	0.912659	Tb927.9.5900:mRNA-p1	Tb927.9.5900:mRNA-p1	Tb927.9.5900:mRNA-p1 | transcript=Tb927.9.5900:mRNA | gene=Tb927.9.5900 | organism=Trypanosoma_brucei_brucei_TREU927 | gene_product=glutamate dehydrogenase | transcript_product=glutamate dehydrogenase | location=Tb927_09_v5.1:995307-998285(+) | protein_len	glutamate dehydrogenase	Tb927.9.5900	33	33	33	48.3	48.3	48.3	112.11	0	209.96	2370300000	197	29	32	30	30	31	30	30	30	29	32	30	30	31	30	30	30	29	32	30	30	31	30	30	30	992	992	41.2	46.8	43.3
	0.779393	0.166191	0.137582	1.10006	Tb927.11.13007:mRNA-p1;Tb927.11.13003:mRNA-p1	Tb927.11.13007:mRNA-p1;Tb927.11.13003:mRNA-p1	Tb927.11.13007:mRNA-p1 | transcript=Tb927.11.13007:mRNA | gene=Tb927.11.13007 | organism=Trypanosoma_brucei_brucei_TREU927 | gene_product=ubiquitin-60S ribosomal protein L40 | transcript_product=ubiquitin-60S ribosomal protein L40 | location=Tb927_11_v5.1:	ubiquitin-60S ribosomal protein L40	Tb927.11.13007	9	9	1	53.9	53.9	7	14.656	0	101.71	14372000000	390	9	9	8	8	8	8	9	8	9	9	8	8	8	8	9	8	1	1	1	1	1	1	1	1	128	NaN	53.9	53.9	49.2
	0.778745	0.166439	0.0426297	1.02999	Tb927.11.17000:mRNA-p1;Tb11.v5.0404.1-p1	Tb927.11.17000:mRNA-p1;Tb11.v5.0404.1-p1	Tb927.11.17000:mRNA-p1 | transcript=Tb927.11.17000:mRNA | gene=Tb927.11.17000 | organism=Trypanosoma_brucei_brucei_TREU927 | gene_product=AIR9-like protein | transcript_product=AIR9-like protein | location=Tb927_11_v5.1:4532213-4535212(-) | protein_length=	AIR9-like protein	Tb927.11.17000	47	47	47	66.6	66.6	66.6	109.72	0	323.31	16884000000	498	45	45	45	46	43	45	45	44	45	45	45	46	43	45	45	44	45	45	45	46	43	45	45	44	999	NaN	62.7	65.8	59.5
	0.77863	0.166483	-0.0937557	0.93708	Tb927.6.4410:mRNA-p1;Tb927.6.4460:mRNA-p1;Tb11.v5.0903.1-p1	Tb927.6.4410:mRNA-p1;Tb927.6.4460:mRNA-p1;Tb11.v5.0903.1-p1	Tb927.6.4410:mRNA-p1 | transcript=Tb927.6.4410:mRNA | gene=Tb927.6.4410 | organism=Trypanosoma_brucei_brucei_TREU927 | gene_product=S-adenosylmethionine decarboxylase | transcript_product=S-adenosylmethionine decarboxylase | location=Tb927_06_v5.1:1240697-	S-adenosylmethionine decarboxylase	Tb927.6.4410	11	11	11	47.6	47.6	47.6	41.748	0	60.229	474920000	54	11	11	11	9	10	10	9	10	11	11	11	9	10	10	9	10	11	11	11	9	10	10	9	10	370	NaN	47.6	47.6	47.6
	0.77848	0.166541	-0.10013	0.932949	Tb927.9.3760:mRNA-p1	Tb927.9.3760:mRNA-p1	Tb927.9.3760:mRNA-p1 | transcript=Tb927.9.3760:mRNA | gene=Tb927.9.3760 | organism=Trypanosoma_brucei_brucei_TREU927 | gene_product=Nucleoporin GLE2 | transcript_product=Nucleoporin GLE2 | location=Tb927_09_v5.1:748720-749769(+) | protein_length=349 | sequ	Nucleoporin GLE2	Tb927.9.3760	10	10	10	46.4	46.4	46.4	38.351	0	57.002	246450000	40	7	7	8	9	9	9	8	8	7	7	8	9	9	9	8	8	7	7	8	9	9	9	8	8	349	349	30.9	36.1	40.4
	0.77839	0.166575	-0.0986896	0.933881	Tb927.5.2820:mRNA-p1	Tb927.5.2820:mRNA-p1	Tb927.5.2820:mRNA-p1 | transcript=Tb927.5.2820:mRNA | gene=Tb927.5.2820 | organism=Trypanosoma_brucei_brucei_TREU927 | gene_product=Serine/threonine-protein kinase NEK6, putative | transcript_product=Serine/threonine-protein kinase NEK6, putative | locatio	Serine/threonine-protein kinase NEK6	Tb927.5.2820	5	5	5	7.6	7.6	7.6	111.62	0	13.327	86895000	22	5	5	5	4	5	5	5	5	5	5	5	4	5	5	5	5	5	5	5	4	5	5	5	5	1030	1030	7.6	7.6	7.6
	0.776932	0.167135	0.0674162	1.04784	Tb927.7.4520:mRNA-p1;Tb11.v5.0265.1-p1	Tb927.7.4520:mRNA-p1;Tb11.v5.0265.1-p1	Tb927.7.4520:mRNA-p1 | transcript=Tb927.7.4520:mRNA | gene=Tb927.7.4520 | organism=Trypanosoma_brucei_brucei_TREU927 | gene_product=Thioredoxin-like, putative | transcript_product=Thioredoxin-like, putative | location=Tb927_07_v5.1:1204118-1204723(-) | pro	Thioredoxin-like	Tb927.7.4520	13	13	13	77.6	77.6	77.6	22.315	0	195.22	9092000000	175	13	13	13	11	12	12	12	12	13	13	13	11	12	12	12	12	13	13	13	11	12	12	12	12	201	NaN	77.6	77.6	77.6
	0.774028	0.168257	-0.186673	0.878629	Tb927.10.5660:mRNA-p1	Tb927.10.5660:mRNA-p1	Tb927.10.5660:mRNA-p1 | transcript=Tb927.10.5660:mRNA | gene=Tb927.10.5660 | organism=Trypanosoma_brucei_brucei_TREU927 | gene_product=heat shock protein, putative | transcript_product=heat shock protein, putative | location=Tb927_10_v5.1:1411256-1412263(+	heat shock protein	Tb927.10.5660	4	4	4	14.6	14.6	14.6	37.873	0	3.4859	27198000	11	2	1	1	3	3	2	2	3	2	1	1	3	3	2	2	3	2	1	1	3	3	2	2	3	335	335	8.4	2.1	2.1
	0.773489	0.168465	-0.124243	0.917485	Tb927.11.3760:mRNA-p1	Tb927.11.3760:mRNA-p1	Tb927.11.3760:mRNA-p1 | transcript=Tb927.11.3760:mRNA | gene=Tb927.11.3760 | organism=Trypanosoma_brucei_brucei_TREU927 | gene_product=hypothetical protein | transcript_product=hypothetical protein | location=Tb927_11_v5.1:1107164-1107886(+) | protein_leng	hypothetical protein	Tb927.11.3760	5	5	5	21.2	21.2	21.2	25.324	0	9.7917	895430000	32	5	5	5	5	5	5	5	5	5	5	5	5	5	5	5	5	5	5	5	5	5	5	5	5	240	240	21.2	21.2	21.2
	0.773107	0.168614	0.184519	1.13644	Tb927.10.3780:mRNA-p1	Tb927.10.3780:mRNA-p1	Tb927.10.3780:mRNA-p1 | transcript=Tb927.10.3780:mRNA | gene=Tb927.10.3780 | organism=Trypanosoma_brucei_brucei_TREU927 | gene_product=hypothetical protein, conserved | transcript_product=hypothetical protein, conserved | location=Tb927_10_v5.1:982038-9851	hypothetical protein	Tb927.10.3780	6	6	6	9.5	9.5	9.5	111.05	0	12.619	49240000	28	6	6	6	3	6	4	4	6	6	6	6	3	6	4	4	6	6	6	6	3	6	4	4	6	1022	1022	9.5	9.5	9.5
	0.772551	0.16883	-0.151362	0.9004	Tb927.10.9100:mRNA-p1;Tb11.v5.0680.1-p1	Tb927.10.9100:mRNA-p1;Tb11.v5.0680.1-p1	Tb927.10.9100:mRNA-p1 | transcript=Tb927.10.9100:mRNA | gene=Tb927.10.9100 | organism=Trypanosoma_brucei_brucei_TREU927 | gene_product=hypothetical protein, conserved | transcript_product=hypothetical protein, conserved | location=Tb927_10_v5.1:2256505-225	hypothetical protein	Tb927.10.9100	1	1	1	3.2	3.2	3.2	82.591	0	14.729	40474000	4	1	1	1	1	1	1	1	1	1	1	1	1	1	1	1	1	1	1	1	1	1	1	1	1	747	NaN	3.2	3.2	3.2
	0.772363	0.168903	0.123143	1.08911	Tb927.2.6100:mRNA-p1	Tb927.2.6100:mRNA-p1	Tb927.2.6100:mRNA-p1 | transcript=Tb927.2.6100:mRNA | gene=Tb927.2.6100 | organism=Trypanosoma_brucei_brucei_TREU927 | gene_product=hypothetical protein, conserved | transcript_product=hypothetical protein, conserved | location=Tb927_02_v5.1:1100463-110192	hypothetical protein	Tb927.2.6100	6	6	6	21.1	21.1	21.1	53.279	0	13.312	100190000	25	5	6	6	6	6	6	6	5	5	6	6	6	6	6	6	5	5	6	6	6	6	6	6	5	487	487	18.3	21.1	21.1
	0.772128	0.168994	0.163805	1.12024	Tb927.11.13680:mRNA-p1	Tb927.11.13680:mRNA-p1	Tb927.11.13680:mRNA-p1 | transcript=Tb927.11.13680:mRNA | gene=Tb927.11.13680 | organism=Trypanosoma_brucei_brucei_TREU927 | gene_product=hypothetical protein, conserved | transcript_product=hypothetical protein, conserved | location=Tb927_11_v5.1:3645444-	hypothetical protein	Tb927.11.13680	3	3	3	12.7	12.7	12.7	37.183	0	3.5922	42437000	9	3	2	2	3	3	3	3	3	3	2	2	3	3	3	3	3	3	2	2	3	3	3	3	3	339	339	12.7	6.5	6.5
	0.771287	0.169322	-0.210833	0.864038	Tb927.6.2440:mRNA-p1	Tb927.6.2440:mRNA-p1	Tb927.6.2440:mRNA-p1 | transcript=Tb927.6.2440:mRNA | gene=Tb927.6.2440 | organism=Trypanosoma_brucei_brucei_TREU927 | gene_product=Mo25-like, putative | transcript_product=Mo25-like, putative | location=Tb927_06_v5.1:746541-747707(+) | protein_length=388	Mo25-like	Tb927.6.2440	4	4	4	13.7	13.7	13.7	42.805	0	11.752	49124000	8	3	3	4	4	3	4	3	3	3	3	4	4	3	4	3	3	3	3	4	4	3	4	3	3	388	388	11.3	8.8	13.7
	0.770305	0.169705	-0.142717	0.905812	Tb927.9.6310:mRNA-p1	Tb927.9.6310:mRNA-p1	Tb927.9.6310:mRNA-p1 | transcript=Tb927.9.6310:mRNA | gene=Tb927.9.6310 | organism=Trypanosoma_brucei_brucei_TREU927 | gene_product=ABC transporter, putative | transcript_product=ABC transporter, putative | location=Tb927_09_v5.1:1035596-1037536(+) | prote	ABC transporter	Tb927.9.6310	4	4	4	11.6	11.6	11.6	72.215	0	18.387	98473000	20	4	3	4	4	4	3	3	4	4	3	4	4	4	3	3	4	4	3	4	4	4	3	3	4	646	646	11.6	6.3	11.6
	0.770051	0.169804	0.152281	1.11133	Tb927.9.5170:mRNA-p1	Tb927.9.5170:mRNA-p1	Tb927.9.5170:mRNA-p1 | transcript=Tb927.9.5170:mRNA | gene=Tb927.9.5170 | organism=Trypanosoma_brucei_brucei_TREU927 | gene_product=phosphomevalonate kinase protein, putative | transcript_product=phosphomevalonate kinase protein, putative | location=Tb927_	phosphomevalonate kinase protein	Tb927.9.5170	3	3	3	7	7	7	51.593	0.0004964	2.3878	37246000	10	2	3	3	3	3	3	2	3	2	3	3	3	3	3	2	3	2	3	3	3	3	3	2	3	471	471	4.9	7	7
	0.76875	0.170314	-0.717902	0.607981	Tb927.10.5280:mRNA-p1;Tb11.v5.0248.1-p1	Tb927.10.5280:mRNA-p1;Tb11.v5.0248.1-p1	Tb927.10.5280:mRNA-p1 | transcript=Tb927.10.5280:mRNA | gene=Tb927.10.5280 | organism=Trypanosoma_brucei_brucei_TREU927 | gene_product=pre-mRNA splicing factor ATP-dependent RNA helicase, putative | transcript_product=pre-mRNA splicing factor ATP-dependent	pre-mRNA splicing factor ATP-dependent RNA helicase	Tb927.10.5280	2	2	2	3.4	3.4	3.4	98.058	0	4.9268	24209000	3	1	2	2	2	2	2	2	2	1	2	2	2	2	2	2	2	1	2	2	2	2	2	2	2	880	NaN	1.4	3.4	3.4
	0.768315	0.170485	0.398184	1.31785	Tb927.8.8040:mRNA-p1	Tb927.8.8040:mRNA-p1	Tb927.8.8040:mRNA-p1 | transcript=Tb927.8.8040:mRNA | gene=Tb927.8.8040 | organism=Trypanosoma_brucei_brucei_TREU927 | gene_product=kinetoplastid-specific phospho-protein phosphatase, putative | transcript_product=kinetoplastid-specific phospho-protein pho	kinetoplastid-specific phospho-protein phosphatase	Tb927.8.8040	2	2	2	14.7	14.7	14.7	27.096	0.00072534	1.9925	13734000	1	1	2	2	2	2	1	2	2	1	2	2	2	2	1	2	2	1	2	2	2	2	1	2	2	252	252	10.3	14.7	14.7
	0.767954	0.170626	0.0820475	1.05852	Tb927.7.1920:mRNA-p1	Tb927.7.1920:mRNA-p1	Tb927.7.1920:mRNA-p1 | transcript=Tb927.7.1920:mRNA | gene=Tb927.7.1920 | organism=Trypanosoma_brucei_brucei_TREU927 | gene_product=paraflagellar rod component, putative | transcript_product=paraflagellar rod component, putative | location=Tb927_07_v5.1:45	paraflagellar rod component	Tb927.7.1920	21	21	21	64.8	64.8	64.8	59.271	0	179.42	1324100000	132	19	16	20	19	16	17	19	18	19	16	20	19	16	17	19	18	19	16	20	19	16	17	19	18	543	543	55.1	43.8	57.3
	0.767695	0.170728	0.115288	1.08319	Tb927.7.3950:mRNA-p1	Tb927.7.3950:mRNA-p1	Tb927.7.3950:mRNA-p1 | transcript=Tb927.7.3950:mRNA | gene=Tb927.7.3950 | organism=Trypanosoma_brucei_brucei_TREU927 | gene_product=RNA-editing 3 terminal uridylyl transferase 1 | transcript_product=RNA-editing 3 terminal uridylyl transferase 1 | locatio	RNA-editing 3 terminal uridylyl transferase 1	Tb927.7.3950	7	7	7	11.8	11.8	11.8	107.38	0	20.581	109390000	13	5	5	4	4	5	4	5	4	5	5	4	4	5	4	5	4	5	5	4	4	5	4	5	4	975	975	9.5	8.9	5
	0.767666	0.17074	0.106327	1.07648	Tb927.11.3160:mRNA-p1	Tb927.11.3160:mRNA-p1	Tb927.11.3160:mRNA-p1 | transcript=Tb927.11.3160:mRNA | gene=Tb927.11.3160 | organism=Trypanosoma_brucei_brucei_TREU927 | gene_product=hypothetical protein, conserved | transcript_product=hypothetical protein, conserved | location=Tb927_11_v5.1:898207-8993	hypothetical protein	Tb927.11.3160	5	5	5	14.4	14.4	14.4	43.836	0	28.53	123290000	20	2	4	4	4	4	4	3	3	2	4	4	4	4	4	3	3	2	4	4	4	4	4	3	3	390	390	6.4	12.3	12.3
	0.767431	0.170832	-0.130727	0.913371	Tb927.10.4060:mRNA-p1	Tb927.10.4060:mRNA-p1	Tb927.10.4060:mRNA-p1 | transcript=Tb927.10.4060:mRNA | gene=Tb927.10.4060 | organism=Trypanosoma_brucei_brucei_TREU927 | gene_product=Ankyrin repeats (3 copies), putative | transcript_product=Ankyrin repeats (3 copies), putative | location=Tb927_10_v5.1:1	Ankyrin repeats (3 copies)	Tb927.10.4060	10	10	10	38	38	38	39.938	0	21.319	274490000	35	8	8	8	8	8	8	9	9	8	8	8	8	8	8	9	9	8	8	8	8	8	8	9	9	368	368	29.6	29.6	29.9
	0.766412	0.171233	-0.0972886	0.934788	Tb927.11.1890:mRNA-p1	Tb927.11.1890:mRNA-p1	Tb927.11.1890:mRNA-p1 | transcript=Tb927.11.1890:mRNA | gene=Tb927.11.1890 | organism=Trypanosoma_brucei_brucei_TREU927 | gene_product=Serine-threonine kinase receptor-associated protein, putative | transcript_product=Serine-threonine kinase receptor-assoc	Serine-threonine kinase receptor-associated protein	Tb927.11.1890	17	17	17	77.6	77.6	77.6	36.025	0	156.1	3341100000	200	17	17	17	17	17	17	17	17	17	17	17	17	17	17	17	17	17	17	17	17	17	17	17	17	326	326	77.6	77.6	77.6
	0.766297	0.171279	-0.114344	0.923803	Tb927.10.13710:mRNA-p1	Tb927.10.13710:mRNA-p1	Tb927.10.13710:mRNA-p1 | transcript=Tb927.10.13710:mRNA | gene=Tb927.10.13710 | organism=Trypanosoma_brucei_brucei_TREU927 | gene_product=Activator of Hsp90 ATPase, N-terminal/Activator of Hsp90 ATPase homolog 1-like protein, putative | transcript_product=	Activator of Hsp90 ATPase	Tb927.10.13710	15	15	15	37.2	37.2	37.2	37.612	0	64.991	2787600000	119	12	13	12	14	13	15	13	13	12	13	12	14	13	15	13	13	12	13	12	14	13	15	13	13	331	331	30.8	37.2	35.3
	0.765893	0.171438	-0.0903678	0.939283	Tb927.10.15180:mRNA-p1	Tb927.10.15180:mRNA-p1	Tb927.10.15180:mRNA-p1 | transcript=Tb927.10.15180:mRNA | gene=Tb927.10.15180 | organism=Trypanosoma_brucei_brucei_TREU927 | gene_product=nucleosome assembly protein, putative | transcript_product=nucleosome assembly protein, putative | location=Tb927_10_v	nucleosome assembly protein	Tb927.10.15180	13	13	13	36.6	36.6	36.6	41.302	0	79.676	1771300000	153	13	13	13	13	13	13	13	13	13	13	13	13	13	13	13	13	13	13	13	13	13	13	13	13	366	366	36.6	36.6	36.6
	0.7655	0.171593	-0.101693	0.931939	Tb927.6.4320:mRNA-p1	Tb927.6.4320:mRNA-p1	Tb927.6.4320:mRNA-p1 | transcript=Tb927.6.4320:mRNA | gene=Tb927.6.4320 | organism=Trypanosoma_brucei_brucei_TREU927 | gene_product=Protein of unknown function (DUF2817), putative | transcript_product=Protein of unknown function (DUF2817), putative | locat	Protein of unknown function (DUF2817)	Tb927.6.4320	12	12	12	42.6	42.6	42.6	44.423	0	65.933	2047700000	133	12	12	12	12	12	12	12	12	12	12	12	12	12	12	12	12	12	12	12	12	12	12	12	12	399	399	42.6	42.6	42.6
	0.765472	0.171604	-0.155269	0.897965	Tb927.10.8690:mRNA-p1	Tb927.10.8690:mRNA-p1	Tb927.10.8690:mRNA-p1 | transcript=Tb927.10.8690:mRNA | gene=Tb927.10.8690 | organism=Trypanosoma_brucei_brucei_TREU927 | gene_product=TIGR00269 family protein, putative | transcript_product=TIGR00269 family protein, putative | location=Tb927_10_v5.1:21483	TIGR00269 family protein	Tb927.10.8690	1	1	1	6	6	6	37.923	0	8.7632	22583000	8	1	1	1	1	1	1	1	1	1	1	1	1	1	1	1	1	1	1	1	1	1	1	1	1	336	336	6	6	6
	0.764783	0.171877	-0.0681052	0.95389	Tb927.6.850:mRNA-p1;Tb11.v5.0689.1-p1	Tb927.6.850:mRNA-p1;Tb11.v5.0689.1-p1	Tb927.6.850:mRNA-p1 | transcript=Tb927.6.850:mRNA | gene=Tb927.6.850 | organism=Trypanosoma_brucei_brucei_TREU927 | gene_product=ccr4-not transcription complex subunit 2 | transcript_product=ccr4-not transcription complex subunit 2 | location=Tb927_06_v5.1	ccr4-not transcription complex subunit 2	Tb927.6.850	7	7	7	39.1	39.1	39.1	37.396	0	67.502	1398900000	62	7	7	7	7	7	7	7	7	7	7	7	7	7	7	7	7	7	7	7	7	7	7	7	7	330	NaN	39.1	39.1	39.1
	0.761537	0.173166	0.188701	1.13974	Tb927.1.2190:mRNA-p1	Tb927.1.2190:mRNA-p1	Tb927.1.2190:mRNA-p1 | transcript=Tb927.1.2190:mRNA | gene=Tb927.1.2190 | organism=Trypanosoma_brucei_brucei_TREU927 | gene_product=Raptor N-terminal CASPase like domain containing protein, putative | transcript_product=Raptor N-terminal CASPase like domai	Raptor N-terminal CASPase like domain containing protein	Tb927.1.2190	4	4	4	3.9	3.9	3.9	188	0	8.7993	66702000	14	4	4	3	4	3	4	4	4	4	4	3	4	3	4	4	4	4	4	3	4	3	4	4	4	1747	1747	3.9	3.9	3.2
	0.761426	0.17321	0.0512748	1.03618	Tb927.10.2490:mRNA-p1	Tb927.10.2490:mRNA-p1	Tb927.10.2490:mRNA-p1 | transcript=Tb927.10.2490:mRNA | gene=Tb927.10.2490 | organism=Trypanosoma_brucei_brucei_TREU927 | gene_product=glucose-6-phosphate 1-dehydrogenase | transcript_product=glucose-6-phosphate 1-dehydrogenase | location=Tb927_10_v5.1:648	glucose-6-phosphate 1-dehydrogenase	Tb927.10.2490	30	30	30	61.8	61.8	61.8	63.503	0	121.71	2220600000	235	27	29	27	28	29	26	27	29	27	29	27	28	29	26	27	29	27	29	27	28	29	26	27	29	558	558	60.2	61.8	60.2
	0.760726	0.17349	-0.251653	0.839934	Tb927.8.6800:mRNA-p1	Tb927.8.6800:mRNA-p1	Tb927.8.6800:mRNA-p1 | transcript=Tb927.8.6800:mRNA | gene=Tb927.8.6800 | organism=Trypanosoma_brucei_brucei_TREU927 | gene_product=hypothetical protein, conserved | transcript_product=hypothetical protein, conserved | location=Tb927_08_v5.1:1964868-196641	hypothetical protein	Tb927.8.6800	2	2	2	4.7	4.7	4.7	57.207	0.00025157	2.6164	13163000	6	2	2	2	2	1	2	2	1	2	2	2	2	1	2	2	1	2	2	2	2	1	2	2	1	516	516	4.7	4.7	4.7
	0.760138	0.173725	0.077704	1.05534	Tb927.6.930:mRNA-p1;Tb927.6.940:mRNA-p1	Tb927.6.930:mRNA-p1;Tb927.6.940:mRNA-p1	Tb927.6.930:mRNA-p1 | transcript=Tb927.6.930:mRNA | gene=Tb927.6.930 | organism=Trypanosoma_brucei_brucei_TREU927 | gene_product=metacaspase MCA3 | transcript_product=metacaspase MCA3 | location=Tb927_06_v5.1:397321-398394(-) | protein_length=357 | sequenc	metacaspase MCA3	Tb927.6.930	9	9	9	47.6	47.6	47.6	38.738	0	64.724	774020000	84	9	7	9	9	9	8	9	9	9	7	9	9	9	8	9	9	9	7	9	9	9	8	9	9	357	NaN	47.6	44.3	47.6
	0.759916	0.173814	0.106575	1.07667	Tb927.8.2380:mRNA-p1	Tb927.8.2380:mRNA-p1	Tb927.8.2380:mRNA-p1 | transcript=Tb927.8.2380:mRNA | gene=Tb927.8.2380 | organism=Trypanosoma_brucei_brucei_TREU927 | gene_product=ABC transporter, putative | transcript_product=ABC transporter, putative | location=Tb927_08_v5.1:713071-716547(+) | protein	ABC transporter	Tb927.8.2380	13	13	13	14.4	14.4	14.4	126.93	0	34.5	294740000	66	11	12	13	12	12	12	11	12	11	12	13	12	12	12	11	12	11	12	13	12	12	12	11	12	1158	1158	13	13.2	14.4
	0.759756	0.173878	-0.261426	0.834263	Tb927.11.14830:mRNA-p1	Tb927.11.14830:mRNA-p1	Tb927.11.14830:mRNA-p1 | transcript=Tb927.11.14830:mRNA | gene=Tb927.11.14830 | organism=Trypanosoma_brucei_brucei_TREU927 | gene_product=hypothetical protein, conserved | transcript_product=hypothetical protein, conserved | location=Tb927_11_v5.1:3940594-	hypothetical protein	Tb927.11.14830	1	1	1	13	13	13	23.288	0.0019148	1.8389	16221000	5	1	1	1	1	1	1	1	1	1	1	1	1	1	1	1	1	1	1	1	1	1	1	1	1	223	223	13	13	13
	0.759458	0.173997	-0.0992908	0.933492	Tb927.9.3280:mRNA-p1	Tb927.9.3280:mRNA-p1	Tb927.9.3280:mRNA-p1 | transcript=Tb927.9.3280:mRNA | gene=Tb927.9.3280 | organism=Trypanosoma_brucei_brucei_TREU927 | gene_product=exopolyphosphatase | transcript_product=exopolyphosphatase | location=Tb927_09_v5.1:693332-694483(+) | protein_length=383 |	exopolyphosphatase	Tb927.9.3280	10	10	10	30.8	30.8	30.8	42.865	0	31.125	349100000	49	10	9	8	7	6	9	8	8	10	9	8	7	6	9	8	8	10	9	8	7	6	9	8	8	383	383	30.8	27.9	25.6
	0.759259	0.174077	-0.186304	0.878855	Tb927.6.2600:mRNA-p1	Tb927.6.2600:mRNA-p1	Tb927.6.2600:mRNA-p1 | transcript=Tb927.6.2600:mRNA | gene=Tb927.6.2600 | organism=Trypanosoma_brucei_brucei_TREU927 | gene_product=Protein of unknown function (DUF1077), putative | transcript_product=Protein of unknown function (DUF1077), putative | locat	Protein of unknown function (DUF1077)	Tb927.6.2600	1	1	1	9.8	9.8	9.8	16.11	0	4.2079	49446000	16	1	1	1	1	1	1	1	1	1	1	1	1	1	1	1	1	1	1	1	1	1	1	1	1	143	143	9.8	9.8	9.8
	0.758426	0.174411	0.0900135	1.06438	Tb927.4.2920:mRNA-p1	Tb927.4.2920:mRNA-p1	Tb927.4.2920:mRNA-p1 | transcript=Tb927.4.2920:mRNA | gene=Tb927.4.2920 | organism=Trypanosoma_brucei_brucei_TREU927 | gene_product=hypothetical protein, conserved | transcript_product=hypothetical protein, conserved | location=Tb927_04_v5.1:774789-777689(	hypothetical protein	Tb927.4.2920	11	11	11	15	15	15	107.59	0	28.537	222990000	29	9	11	9	9	9	7	9	10	9	11	9	9	9	7	9	10	9	11	9	9	9	7	9	10	966	966	11.3	15	11.9
	0.757968	0.174595	-0.170272	0.888675	Tb927.10.11210:mRNA-p1	Tb927.10.11210:mRNA-p1	Tb927.10.11210:mRNA-p1 | transcript=Tb927.10.11210:mRNA | gene=Tb927.10.11210 | organism=Trypanosoma_brucei_brucei_TREU927 | gene_product=hypothetical protein, conserved | transcript_product=hypothetical protein, conserved | location=Tb927_10_v5.1:2743179-	hypothetical protein	Tb927.10.11210	5	5	5	12.7	12.7	12.7	50.464	0	4.1676	44274000	11	4	3	4	4	4	3	3	4	4	3	4	4	4	3	3	4	4	3	4	4	4	3	3	4	471	471	11	9.1	10.4
	0.757722	0.174694	0.219964	1.1647	Tb927.11.10630:mRNA-p1	Tb927.11.10630:mRNA-p1	Tb927.11.10630:mRNA-p1 | transcript=Tb927.11.10630:mRNA | gene=Tb927.11.10630 | organism=Trypanosoma_brucei_brucei_TREU927 | gene_product=hypothetical protein, conserved | transcript_product=hypothetical protein, conserved | location=Tb927_11_v5.1:2830653-	hypothetical protein	Tb927.11.10630	2	2	2	3	3	3	98.538	0	3.0409	14172000	5	1	1	1	2	1	1	1	1	1	1	1	2	1	1	1	1	1	1	1	2	1	1	1	1	898	898	1.9	1.9	1.9
	0.756314	0.175261	0.13885	1.10103	Tb927.11.280:mRNA-p1	Tb927.11.280:mRNA-p1	Tb927.11.280:mRNA-p1 | transcript=Tb927.11.280:mRNA | gene=Tb927.11.280 | organism=Trypanosoma_brucei_brucei_TREU927 | gene_product=hypothetical protein, conserved | transcript_product=hypothetical protein, conserved | location=Tb927_11_v5.1:64134-66080(-)	hypothetical protein	Tb927.11.280	5	5	5	13.4	13.4	13.4	71.963	0	27.161	135130000	23	5	5	4	5	5	5	5	5	5	5	4	5	5	5	5	5	5	5	4	5	5	5	5	5	648	648	13.4	13.4	11.7
	0.756038	0.175373	-0.125272	0.916831	Tb927.3.2750:mRNA-p1	Tb927.3.2750:mRNA-p1	Tb927.3.2750:mRNA-p1 | transcript=Tb927.3.2750:mRNA | gene=Tb927.3.2750 | organism=Trypanosoma_brucei_brucei_TREU927 | gene_product=hypothetical protein, conserved | transcript_product=hypothetical protein, conserved | location=Tb927_03_v5.1:703304-705919(	hypothetical protein	Tb927.3.2750	4	4	4	6.2	6.2	6.2	95.98	0	9.8099	50770000	14	3	4	3	4	4	4	4	4	3	4	3	4	4	4	4	4	3	4	3	4	4	4	4	4	871	871	3.8	6.2	3.8
	0.755276	0.175681	-0.131299	0.913009	Tb927.5.590:mRNA-p1	Tb927.5.590:mRNA-p1	Tb927.5.590:mRNA-p1 | transcript=Tb927.5.590:mRNA | gene=Tb927.5.590 | organism=Trypanosoma_brucei_brucei_TREU927 | gene_product=protein phosphatase 1, regulatory subunit, putative | transcript_product=protein phosphatase 1, regulatory subunit, putative |	protein phosphatase 1	Tb927.5.590	8	8	8	26.3	26.3	26.3	45.74	0	23.163	475660000	35	8	8	8	6	5	7	8	7	8	8	8	6	5	7	8	7	8	8	8	6	5	7	8	7	403	403	26.3	26.3	26.3
	0.754494	0.175997	-0.137107	0.909341	Tb927.11.6090:mRNA-p1;Tb11.v5.0746.1-p1	Tb927.11.6090:mRNA-p1;Tb11.v5.0746.1-p1	Tb927.11.6090:mRNA-p1 | transcript=Tb927.11.6090:mRNA | gene=Tb927.11.6090 | organism=Trypanosoma_brucei_brucei_TREU927 | gene_product=tatD related deoxyribonuclease, putative | transcript_product=tatD related deoxyribonuclease, putative | location=Tb927_1	tatD related deoxyribonuclease	Tb927.11.6090	4	4	4	15	15	15	37.431	0	9.9248	79568000	24	4	4	3	4	4	4	4	3	4	4	3	4	4	4	4	3	4	4	3	4	4	4	4	3	334	NaN	15	15	12.3
	0.754129	0.176145	-0.0928445	0.937672	Tb927.8.3710:mRNA-p1	Tb927.8.3710:mRNA-p1	Tb927.8.3710:mRNA-p1 | transcript=Tb927.8.3710:mRNA | gene=Tb927.8.3710 | organism=Trypanosoma_brucei_brucei_TREU927 | gene_product=3-5 exonuclease | transcript_product=3-5 exonuclease | location=Tb927_08_v5.1:1112356-1114725(-) | protein_length=789 |	3-5 exonuclease	Tb927.8.3710	15	15	15	29.8	29.8	29.8	84.503	0	49.104	261980000	42	12	13	12	14	14	13	13	15	12	13	12	14	14	13	13	15	12	13	12	14	14	13	13	15	789	789	26.1	27.4	23.7
	0.753951	0.176218	-0.121582	0.919179	Tb927.10.10010:mRNA-p1	Tb927.10.10010:mRNA-p1	Tb927.10.10010:mRNA-p1 | transcript=Tb927.10.10010:mRNA | gene=Tb927.10.10010 | organism=Trypanosoma_brucei_brucei_TREU927 | gene_product=mRNA turnover protein 4 homolog, putative | transcript_product=mRNA turnover protein 4 homolog, putative | location=Tb	mRNA turnover protein 4 homolog	Tb927.10.10010	11	11	11	62.8	62.8	62.8	25.628	0	43.511	765400000	58	9	9	11	10	11	10	10	10	9	9	11	10	11	10	10	10	9	9	11	10	11	10	10	10	226	226	50.4	52.2	62.8
	0.753779	0.176287	-0.0586052	0.960192	Tb927.7.6090:mRNA-p1	Tb927.7.6090:mRNA-p1	Tb927.7.6090:mRNA-p1 | transcript=Tb927.7.6090:mRNA | gene=Tb927.7.6090 | organism=Trypanosoma_brucei_brucei_TREU927 | gene_product=eukaryotic translation initiation factor 3 subunit a | transcript_product=eukaryotic translation initiation factor 3 subunit	eukaryotic translation initiation factor 3 subunit a	Tb927.7.6090	31	31	31	45.3	45.3	45.3	88.162	0	157.62	4499800000	266	29	28	28	29	30	28	28	29	29	28	28	29	30	28	28	29	29	28	28	29	30	28	28	29	762	762	42.8	42.7	42.7
	0.752898	0.176645	-0.190801	0.876119	Tb927.7.970:mRNA-p1	Tb927.7.970:mRNA-p1	Tb927.7.970:mRNA-p1 | transcript=Tb927.7.970:mRNA | gene=Tb927.7.970 | organism=Trypanosoma_brucei_brucei_TREU927 | gene_product=NMD3 family, putative | transcript_product=NMD3 family, putative | location=Tb927_07_v5.1:250779-252407(+) | protein_length=542	NMD3 family	Tb927.7.970	7	7	7	16.1	16.1	16.1	62.792	0	14.478	123950000	30	6	5	5	6	6	6	6	6	6	5	5	6	6	6	6	6	6	5	5	6	6	6	6	6	542	542	13.8	11.3	11.3
	0.750773	0.177512	0.0996785	1.07153	Tb927.7.2650:mRNA-p1	Tb927.7.2650:mRNA-p1	Tb927.7.2650:mRNA-p1 | transcript=Tb927.7.2650:mRNA | gene=Tb927.7.2650 | organism=Trypanosoma_brucei_brucei_TREU927 | gene_product=hypothetical protein, conserved | transcript_product=hypothetical protein, conserved | location=Tb927_07_v5.1:680735-682348(	hypothetical protein	Tb927.7.2650	29	29	18	55.7	55.7	38.9	62.171	0	323.31	13988000000	250	28	28	28	28	28	28	28	28	28	28	28	28	28	28	28	28	18	18	18	18	18	18	18	18	537	537	55.5	55.7	55.5
	0.750555	0.177601	0.17872	1.13188	Tb927.10.8710:mRNA-p1	Tb927.10.8710:mRNA-p1	Tb927.10.8710:mRNA-p1 | transcript=Tb927.10.8710:mRNA | gene=Tb927.10.8710 | organism=Trypanosoma_brucei_brucei_TREU927 | gene_product=centrin-3 | transcript_product=centrin-3 | location=Tb927_10_v5.1:2151778-2152275(+) | protein_length=165 | sequence_SO=c	centrin-3	Tb927.10.8710	6	6	6	54.5	54.5	54.5	18.801	0	30.087	161930000	29	6	6	6	6	5	6	5	6	6	6	6	6	5	6	5	6	6	6	6	6	5	6	5	6	165	165	54.5	54.5	54.5
	0.750443	0.177647	-0.0999451	0.933069	Tb927.11.6610:mRNA-p1	Tb927.11.6610:mRNA-p1	Tb927.11.6610:mRNA-p1 | transcript=Tb927.11.6610:mRNA | gene=Tb927.11.6610 | organism=Trypanosoma_brucei_brucei_TREU927 | gene_product=hypothetical protein, conserved | transcript_product=hypothetical protein, conserved | location=Tb927_11_v5.1:1866744-186	hypothetical protein	Tb927.11.6610	16	16	16	54.9	54.9	54.9	40.25	0	109.03	1141100000	123	15	16	16	16	16	16	16	15	15	16	16	16	16	16	16	15	15	16	16	16	16	16	16	15	364	364	50	54.9	54.9
	0.749125	0.178186	0.0226827	1.01585	Tb927.10.1170:mRNA-p1;Tb11.0560:mRNA-p1;Tb11.v5.0858.1-p1	Tb927.10.1170:mRNA-p1;Tb11.0560:mRNA-p1	Tb927.10.1170:mRNA-p1 | transcript=Tb927.10.1170:mRNA | gene=Tb927.10.1170 | organism=Trypanosoma_brucei_brucei_TREU927 | gene_product=intraflagellar transport protein 172 | transcript_product=intraflagellar transport protein 172 | location=Tb927_10_v5.1:3	intraflagellar transport protein 172	Tb927.10.1170	86	86	86	62	62	62	196.6	0	323.31	7143900000	705	81	83	82	79	82	79	76	82	81	83	82	79	82	79	76	82	81	83	82	79	82	79	76	82	1747	NaN	59	59.1	59.3
	0.749087	0.178202	0.123631	1.08947	Tb927.7.5050:mRNA-p1;Tb11.v5.0185.1-p1	Tb927.7.5050:mRNA-p1;Tb11.v5.0185.1-p1	Tb927.7.5050:mRNA-p1 | transcript=Tb927.7.5050:mRNA | gene=Tb927.7.5050 | organism=Trypanosoma_brucei_brucei_TREU927 | gene_product=hypothetical protein, conserved | transcript_product=hypothetical protein, conserved | location=Tb927_07_v5.1:1331171-133409	hypothetical protein	Tb927.7.5050	12	12	12	18.5	18.5	18.5	105.21	0	46.422	378570000	57	12	12	11	12	11	11	12	11	12	12	11	12	11	11	12	11	12	12	11	12	11	11	12	11	973	NaN	18.5	18.5	17.7
	0.748034	0.178635	-0.228827	0.853329	Tb927.2.4445:mRNA-p1	Tb927.2.4445:mRNA-p1	Tb927.2.4445:mRNA-p1 | transcript=Tb927.2.4445:mRNA | gene=Tb927.2.4445 | organism=Trypanosoma_brucei_brucei_TREU927 | gene_product=hypothetical protein, conserved | transcript_product=hypothetical protein, conserved | location=Tb927_02_v5.1:787612-788013(	hypothetical protein	Tb927.2.4445	2	2	2	30.8	30.8	30.8	15.441	0	13.452	158840000	9	2	2	2	2	2	2	2	2	2	2	2	2	2	2	2	2	2	2	2	2	2	2	2	2	133	133	30.8	30.8	30.8
	0.747709	0.178768	0.228573	1.17168	Tb927.10.360:mRNA-p1	Tb927.10.360:mRNA-p1	Tb927.10.360:mRNA-p1 | transcript=Tb927.10.360:mRNA | gene=Tb927.10.360 | organism=Trypanosoma_brucei_brucei_TREU927 | gene_product=hypothetical protein, conserved | transcript_product=hypothetical protein, conserved | location=Tb927_10_v5.1:100266-101177(	hypothetical protein	Tb927.10.360	3	3	3	12.2	12.2	12.2	33.791	0.000492	2.2569	59100000	4	3	3	3	1	2	2	1	1	3	3	3	1	2	2	1	1	3	3	3	1	2	2	1	1	303	303	12.2	12.2	12.2
	0.746492	0.17927	-0.0847349	0.942958	Tb927.11.1710:mRNA-p1	Tb927.11.1710:mRNA-p1	Tb927.11.1710:mRNA-p1 | transcript=Tb927.11.1710:mRNA | gene=Tb927.11.1710 | organism=Trypanosoma_brucei_brucei_TREU927 | gene_product=guide RNA-binding protein of 21 kDa | transcript_product=guide RNA-binding protein of 21 kDa | location=Tb927_11_v5.1:520	guide RNA-binding protein of 21 kDa	Tb927.11.1710	12	12	12	48.5	48.5	48.5	23.253	0	55.634	1783100000	124	11	11	12	12	11	12	11	11	11	11	12	12	11	12	11	11	11	11	12	12	11	12	11	11	206	206	45.6	45.6	48.5
	0.746343	0.179332	-0.141709	0.906445	Tb927.10.12240:mRNA-p1	Tb927.10.12240:mRNA-p1	Tb927.10.12240:mRNA-p1 | transcript=Tb927.10.12240:mRNA | gene=Tb927.10.12240 | organism=Trypanosoma_brucei_brucei_TREU927 | gene_product=3-ketoacyl-CoA reductase, putative | transcript_product=3-ketoacyl-CoA reductase, putative | location=Tb927_10_v5.1:29	3-ketoacyl-CoA reductase	Tb927.10.12240	5	5	5	24.5	24.5	24.5	36.075	0	16.755	171100000	21	5	5	5	3	4	5	5	4	5	5	5	3	4	5	5	4	5	5	5	3	4	5	5	4	327	327	24.5	24.5	24.5
	0.746302	0.179349	-0.150182	0.901137	Tb927.4.5110:mRNA-p1	Tb927.4.5110:mRNA-p1	Tb927.4.5110:mRNA-p1 | transcript=Tb927.4.5110:mRNA | gene=Tb927.4.5110 | organism=Trypanosoma_brucei_brucei_TREU927 | gene_product=kinetoplastid kinetochore protein 8 | transcript_product=kinetoplastid kinetochore protein 8 | location=Tb927_04_v5.1:139884	kinetoplastid kinetochore protein 8	Tb927.4.5110	7	7	7	25.1	25.1	25.1	44.568	0	13.277	117240000	26	5	6	6	5	6	7	6	6	5	6	6	5	6	7	6	6	5	6	6	5	6	7	6	6	399	399	19.8	22.1	22.1
	0.744933	0.179915	-0.339185	0.790488	Tb927.7.170:mRNA-p1	Tb927.7.170:mRNA-p1	Tb927.7.170:mRNA-p1 | transcript=Tb927.7.170:mRNA | gene=Tb927.7.170 | organism=Trypanosoma_brucei_brucei_TREU927 | gene_product=expression site-associated gene 9 (ESAG9) protein, putative | transcript_product=expression site-associated gene 9 (ESAG9) prot	expression site-associated gene 9 (ESAG9) protein	Tb927.7.170	2	2	2	8.1	8.1	8.1	27.144	0.00025056	2.5323	17435000	8	2	2	1	2	2	2	2	2	2	2	1	2	2	2	2	2	2	2	1	2	2	2	2	2	260	260	8.1	8.1	4.2
	0.744578	0.180062	0.193272	1.14335	Tb927.11.14610:mRNA-p1;Tb11.v5.1027.1-p1	Tb927.11.14610:mRNA-p1;Tb11.v5.1027.1-p1	Tb927.11.14610:mRNA-p1 | transcript=Tb927.11.14610:mRNA | gene=Tb927.11.14610 | organism=Trypanosoma_brucei_brucei_TREU927 | gene_product=procyclin-associated gene 4 (PAG4) protein, putative | transcript_product=procyclin-associated gene 4 (PAG4) protein,	procyclin-associated gene 4 (PAG4) protein	Tb927.11.14610	4	4	4	14.1	14.1	14.1	40.665	0	7.3829	66440000	11	3	3	4	3	4	4	3	2	3	3	4	3	4	4	3	2	3	3	4	3	4	4	3	2	369	NaN	11.4	12.2	14.1
	0.743289	0.180597	-0.141152	0.906795	Tb927.9.5380:mRNA-p1	Tb927.9.5380:mRNA-p1	Tb927.9.5380:mRNA-p1 | transcript=Tb927.9.5380:mRNA | gene=Tb927.9.5380 | organism=Trypanosoma_brucei_brucei_TREU927 | gene_product=Rab-GTPase-TBC domain containing protein, putative | transcript_product=Rab-GTPase-TBC domain containing protein, putative |	Rab-GTPase-TBC domain containing protein	Tb927.9.5380	5	5	5	14.4	14.4	14.4	81.195	0	18.866	121410000	21	5	4	3	4	5	4	5	4	5	4	3	4	5	4	5	4	5	4	3	4	5	4	5	4	741	741	14.4	12.6	8
	0.742612	0.180879	0.172064	1.12667	Tb927.8.2020:mRNA-p1	Tb927.8.2020:mRNA-p1	Tb927.8.2020:mRNA-p1 | transcript=Tb927.8.2020:mRNA | gene=Tb927.8.2020 | organism=Trypanosoma_brucei_brucei_TREU927 | gene_product=agmatinase, putative | transcript_product=agmatinase, putative | location=Tb927_08_v5.1:637313-638308(+) | protein_length=33	agmatinase	Tb927.8.2020	4	4	4	16.6	16.6	16.6	36.517	0.00024938	2.4564	24074000	3	3	3	3	3	1	2	2	1	3	3	3	3	1	2	2	1	3	3	3	3	1	2	2	1	331	331	12.1	13	12.1
	0.740408	0.181799	-0.199755	0.870699	Tb927.11.1180:mRNA-p1;Tb11.v5.0387.1-p1	Tb927.11.1180:mRNA-p1;Tb11.v5.0387.1-p1	Tb927.11.1180:mRNA-p1 | transcript=Tb927.11.1180:mRNA | gene=Tb927.11.1180 | organism=Trypanosoma_brucei_brucei_TREU927 | gene_product=cdc2-related kinase 6, putative | transcript_product=cdc2-related kinase 6, putative | location=Tb927_11_v5.1:346462-3474	cdc2-related kinase 6	Tb927.11.1180	5	5	5	20.6	20.6	20.6	36.728	0	15.005	79705000	18	3	4	4	3	3	3	4	4	3	4	4	3	3	3	4	4	3	4	4	3	3	3	4	4	325	NaN	12	16	16
	0.739634	0.182124	-0.0985379	0.933979	Tb927.11.11140:mRNA-p1	Tb927.11.11140:mRNA-p1	Tb927.11.11140:mRNA-p1 | transcript=Tb927.11.11140:mRNA | gene=Tb927.11.11140 | organism=Trypanosoma_brucei_brucei_TREU927 | gene_product=hypothetical protein | transcript_product=hypothetical protein | location=Tb927_11_v5.1:2980951-2983929(+) | protein_l	hypothetical protein	Tb927.11.11140	13	13	13	16.8	16.8	16.8	108.85	0	28.983	365400000	35	11	10	9	11	11	12	11	12	11	10	9	11	11	12	11	12	11	10	9	11	11	12	11	12	992	992	13.7	12.6	11.4
	0.739098	0.182348	-0.400634	0.757525	Tb927.11.2040:mRNA-p1	Tb927.11.2040:mRNA-p1	Tb927.11.2040:mRNA-p1 | transcript=Tb927.11.2040:mRNA | gene=Tb927.11.2040 | organism=Trypanosoma_brucei_brucei_TREU927 | gene_product=STE/STE11 serine/threonine-protein kinase, putative | transcript_product=STE/STE11 serine/threonine-protein kinase, putat	STE/STE11 serine/threonine-protein kinase	Tb927.11.2040	5	5	5	11.1	11.1	11.1	80.668	0	6.874	272190000	14	5	5	4	4	4	5	5	4	5	5	4	4	4	5	5	4	5	5	4	4	4	5	5	4	751	751	11.1	11.1	9.5
	0.738465	0.182614	-0.0860858	0.942075	Tb927.6.2250:mRNA-p1	Tb927.6.2250:mRNA-p1	Tb927.6.2250:mRNA-p1 | transcript=Tb927.6.2250:mRNA | gene=Tb927.6.2250 | organism=Trypanosoma_brucei_brucei_TREU927 | gene_product=rac serine-threonine kinase, putative | transcript_product=rac serine-threonine kinase, putative | location=Tb927_06_v5.1:70	rac serine-threonine kinase	Tb927.6.2250	12	12	12	41	41	41	51.889	0	79.343	816920000	89	11	12	12	11	11	12	11	11	11	12	12	11	11	12	11	11	11	12	12	11	11	12	11	11	458	458	37.3	41	41
	0.73828	0.182692	-0.234125	0.8502	Tb927.3.1600:mRNA-p1	Tb927.3.1600:mRNA-p1	Tb927.3.1600:mRNA-p1 | transcript=Tb927.3.1600:mRNA | gene=Tb927.3.1600 | organism=Trypanosoma_brucei_brucei_TREU927 | gene_product=Mitochondrial import inner membrane translocase subunit 10 | transcript_product=Mitochondrial import inner membrane transloc	Mitochondrial import inner membrane translocase subunit 10	Tb927.3.1600	4	4	4	50	50	50	11.872	0	7.8078	69737000	16	2	3	3	2	3	2	1	3	2	3	3	2	3	2	1	3	2	3	3	2	3	2	1	3	102	102	24.5	42.2	42.2
	0.73809	0.182772	-0.0841112	0.943366	Tb927.10.8080:mRNA-p1	Tb927.10.8080:mRNA-p1	Tb927.10.8080:mRNA-p1 | transcript=Tb927.10.8080:mRNA | gene=Tb927.10.8080 | organism=Trypanosoma_brucei_brucei_TREU927 | gene_product=Uncharacterized conserved protein (DUF2042), putative | transcript_product=Uncharacterized conserved protein (DUF2042), p	Uncharacterized conserved protein (DUF2042)	Tb927.10.8080	21	21	21	40.7	40.7	40.7	82.38	0	75.308	502210000	96	17	16	20	16	20	17	19	18	17	16	20	16	20	17	19	18	17	16	20	16	20	17	19	18	740	740	34.5	31.4	37
	0.737614	0.182973	-0.244864	0.843895	Tb927.7.1230:mRNA-p1	Tb927.7.1230:mRNA-p1	Tb927.7.1230:mRNA-p1 | transcript=Tb927.7.1230:mRNA | gene=Tb927.7.1230 | organism=Trypanosoma_brucei_brucei_TREU927 | gene_product=hypothetical protein, conserved | transcript_product=hypothetical protein, conserved | location=Tb927_07_v5.1:318350-320872(	hypothetical protein	Tb927.7.1230	5	5	5	11	11	11	92.929	0	18.986	98873000	21	5	5	5	4	5	5	4	5	5	5	5	4	5	5	4	5	5	5	5	4	5	5	4	5	840	840	11	11	11
	0.737269	0.183118	-0.830976	0.562149	Tb927.10.5270:mRNA-p1;Tb11.v5.0249.1-p1	Tb927.10.5270:mRNA-p1;Tb11.v5.0249.1-p1	Tb927.10.5270:mRNA-p1 | transcript=Tb927.10.5270:mRNA | gene=Tb927.10.5270 | organism=Trypanosoma_brucei_brucei_TREU927 | gene_product=mitogen-activated protein kinase kinase 5 | transcript_product=mitogen-activated protein kinase kinase 5 | location=Tb927	mitogen-activated protein kinase kinase 5	Tb927.10.5270	2	2	2	7.4	7.4	7.4	41.692	0	3.5031	12444000	5	1	2	0	1	1	2	1	2	1	2	0	1	1	2	1	2	1	2	0	1	1	2	1	2	378	NaN	3.7	7.4	0
	0.737061	0.183206	0.261033	1.19834	Tb927.11.6570:mRNA-p1	Tb927.11.6570:mRNA-p1	Tb927.11.6570:mRNA-p1 | transcript=Tb927.11.6570:mRNA | gene=Tb927.11.6570 | organism=Trypanosoma_brucei_brucei_TREU927 | gene_product=Nodulin-like, putative | transcript_product=Nodulin-like, putative | location=Tb927_11_v5.1:1847602-1849431(-) | protein_	Nodulin-like	Tb927.11.6570	2	2	2	3.9	3.9	3.9	67.604	0	4.591	53127000	7	2	2	2	2	2	2	2	2	2	2	2	2	2	2	2	2	2	2	2	2	2	2	2	2	609	609	3.9	3.9	3.9
	0.736978	0.183241	0.141509	1.10306	Tb927.8.3200:mRNA-p1	Tb927.8.3200:mRNA-p1	Tb927.8.3200:mRNA-p1 | transcript=Tb927.8.3200:mRNA | gene=Tb927.8.3200 | organism=Trypanosoma_brucei_brucei_TREU927 | gene_product=Rapamycin-insensitive companion of TOR2 | transcript_product=Rapamycin-insensitive companion of TOR2 | location=Tb927_08_v5.	Rapamycin-insensitive companion of TOR2	Tb927.8.3200	1	1	1	0.9	0.9	0.9	156.11	0.0030806	1.6919	9818100	3	1	1	1	1	1	1	1	1	1	1	1	1	1	1	1	1	1	1	1	1	1	1	1	1	1405	1405	0.9	0.9	0.9
	0.736768	0.183329	0.189577	1.14043	Tb927.8.4340:mRNA-p1	Tb927.8.4340:mRNA-p1	Tb927.8.4340:mRNA-p1 | transcript=Tb927.8.4340:mRNA | gene=Tb927.8.4340 | organism=Trypanosoma_brucei_brucei_TREU927 | gene_product=hypothetical protein, conserved | transcript_product=hypothetical protein, conserved | location=Tb927_08_v5.1:1289218-128982	hypothetical protein	Tb927.8.4340	2	2	2	10.5	10.5	10.5	22.171	0	3.2591	25875000	14	1	1	1	1	2	1	1	1	1	1	1	1	2	1	1	1	1	1	1	1	2	1	1	1	200	200	6.5	6.5	6.5
	0.736167	0.183583	-0.238223	0.847789	Tb927.11.450:mRNA-p1	Tb927.11.450:mRNA-p1	Tb927.11.450:mRNA-p1 | transcript=Tb927.11.450:mRNA | gene=Tb927.11.450 | organism=Trypanosoma_brucei_brucei_TREU927 | gene_product=hypothetical protein, conserved | transcript_product=hypothetical protein, conserved | location=Tb927_11_v5.1:99923-102388(-	hypothetical protein	Tb927.11.450	5	5	5	6.7	6.7	6.7	90.205	0	5.0971	27696000	4	3	2	4	1	4	3	3	4	3	2	4	1	4	3	3	4	3	2	4	1	4	3	3	4	821	821	4	2.8	5.4
	0.735977	0.183664	0.256167	1.1943	Tb927.5.4010:mRNA-p1	Tb927.5.4010:mRNA-p1	Tb927.5.4010:mRNA-p1 | transcript=Tb927.5.4010:mRNA | gene=Tb927.5.4010 | organism=Trypanosoma_brucei_brucei_TREU927 | gene_product=Enriched in surface-labeled proteome protein 4 | transcript_product=Enriched in surface-labeled proteome protein 4 | locatio	Enriched in surface-labeled proteome protein 4	Tb927.5.4010	1	1	1	4.9	4.9	4.9	33.932	0	4.5055	24503000	8	1	1	1	1	1	1	1	1	1	1	1	1	1	1	1	1	1	1	1	1	1	1	1	1	304	304	4.9	4.9	4.9
	0.735537	0.18385	-0.105475	0.929499	Tb927.7.1500:mRNA-p1	Tb927.7.1500:mRNA-p1	Tb927.7.1500:mRNA-p1 | transcript=Tb927.7.1500:mRNA | gene=Tb927.7.1500 | organism=Trypanosoma_brucei_brucei_TREU927 | gene_product=Cytosolic Fe-S cluster assembly factor CFD1, putative | transcript_product=Cytosolic Fe-S cluster assembly factor CFD1, puta	Cytosolic Fe-S cluster assembly factor CFD1	Tb927.7.1500	6	6	6	33.9	33.9	33.9	30.73	0	35.66	230290000	22	5	4	6	6	4	4	6	6	5	4	6	6	4	4	6	6	5	4	6	6	4	4	6	6	289	289	28	23.9	33.9
	0.734912	0.184115	0.152665	1.11162	Tb927.10.3090:mRNA-p1	Tb927.10.3090:mRNA-p1	Tb927.10.3090:mRNA-p1 | transcript=Tb927.10.3090:mRNA | gene=Tb927.10.3090 | organism=Trypanosoma_brucei_brucei_TREU927 | gene_product=hypothetical protein, conserved | transcript_product=hypothetical protein, conserved | location=Tb927_10_v5.1:807422-8099	hypothetical protein	Tb927.10.3090	5	5	5	8.5	8.5	8.5	94.961	0	4.1	71785000	5	3	3	3	4	4	4	4	4	3	3	3	4	4	4	4	4	3	3	3	4	4	4	4	4	833	833	5.9	5.9	5.5
	0.734778	0.184171	-0.157501	0.896577	Tb927.10.6290:mRNA-p1;Tb11.v5.0277.1-p1	Tb927.10.6290:mRNA-p1;Tb11.v5.0277.1-p1	Tb927.10.6290:mRNA-p1 | transcript=Tb927.10.6290:mRNA | gene=Tb927.10.6290 | organism=Trypanosoma_brucei_brucei_TREU927 | gene_product=ATP-dependent DEAD/H RNA helicase, putative | transcript_product=ATP-dependent DEAD/H RNA helicase, putative | location=T	ATP-dependent DEAD/H RNA helicase	Tb927.10.6290	7	7	7	17	17	17	57.578	0	14.249	99628000	24	6	4	5	5	3	4	5	4	6	4	5	5	3	4	5	4	6	4	5	5	3	4	5	4	512	NaN	13.9	11.7	12.5
	0.733639	0.184655	-0.129241	0.914312	Tb927.11.11720:mRNA-p1	Tb927.11.11720:mRNA-p1	Tb927.11.11720:mRNA-p1 | transcript=Tb927.11.11720:mRNA | gene=Tb927.11.11720 | organism=Trypanosoma_brucei_brucei_TREU927 | gene_product=FG-GAP repeat protein, putative | transcript_product=FG-GAP repeat protein, putative | location=Tb927_11_v5.1:3143024-	FG-GAP repeat protein	Tb927.11.11720	5	5	5	9.5	9.5	9.5	68.206	0	9.5164	116570000	15	3	4	5	4	4	5	5	5	3	4	5	4	4	5	5	5	3	4	5	4	4	5	5	5	622	622	5.3	8	9.5
	0.733302	0.184798	-0.258203	0.836129	Tb927.11.12910:mRNA-p1	Tb927.11.12910:mRNA-p1	Tb927.11.12910:mRNA-p1 | transcript=Tb927.11.12910:mRNA | gene=Tb927.11.12910 | organism=Trypanosoma_brucei_brucei_TREU927 | gene_product=prefoldin subunit, putative | transcript_product=prefoldin subunit, putative | location=Tb927_11_v5.1:3461139-3461780(	prefoldin subunit	Tb927.11.12910	2	2	2	12.7	12.7	12.7	23.598	0	7.436	46049000	11	2	2	2	2	2	2	2	2	2	2	2	2	2	2	2	2	2	2	2	2	2	2	2	2	213	213	12.7	12.7	12.7
	0.73309	0.184889	0.0855098	1.06106	Tb927.11.7470:mRNA-p1	Tb927.11.7470:mRNA-p1	Tb927.11.7470:mRNA-p1 | transcript=Tb927.11.7470:mRNA | gene=Tb927.11.7470 | organism=Trypanosoma_brucei_brucei_TREU927 | gene_product=hypothetical protein, conserved | transcript_product=hypothetical protein, conserved | location=Tb927_11_v5.1:2120179-212	hypothetical protein	Tb927.11.7470	11	11	11	74.5	74.5	74.5	26.198	0	142.29	1176200000	84	11	10	10	11	11	11	11	11	11	10	10	11	11	11	11	11	11	10	10	11	11	11	11	11	247	247	74.5	74.5	74.5
	0.730088	0.186171	0.156919	1.1149	Tb927.6.3820:mRNA-p1	Tb927.6.3820:mRNA-p1	Tb927.6.3820:mRNA-p1 | transcript=Tb927.6.3820:mRNA | gene=Tb927.6.3820 | organism=Trypanosoma_brucei_brucei_TREU927 | gene_product=hypothetical protein, conserved | transcript_product=hypothetical protein, conserved | location=Tb927_06_v5.1:1131402-113394	hypothetical protein	Tb927.6.3820	9	9	9	15.8	15.8	15.8	93.659	0	18.091	109940000	24	8	6	8	7	7	8	8	8	8	6	8	7	7	8	8	8	8	6	8	7	7	8	8	8	847	847	14.3	10.9	13.9
	0.729895	0.186254	0.42116	1.339	Tb927.5.3570:mRNA-p1	Tb927.5.3570:mRNA-p1	Tb927.5.3570:mRNA-p1 | transcript=Tb927.5.3570:mRNA | gene=Tb927.5.3570 | organism=Trypanosoma_brucei_brucei_TREU927 | gene_product=hypothetical protein, conserved | transcript_product=hypothetical protein, conserved | location=Tb927_05_v5.1:1176645-117746	hypothetical protein	Tb927.5.3570	1	1	1	6.6	6.6	6.6	29.735	0	4.7415	32609000	3	1	0	1	1	1	1	1	1	1	0	1	1	1	1	1	1	1	0	1	1	1	1	1	1	273	273	6.6	0	6.6
	0.729686	0.186344	-0.188542	0.877492	Tb927.10.2750:mRNA-p1	Tb927.10.2750:mRNA-p1	Tb927.10.2750:mRNA-p1 | transcript=Tb927.10.2750:mRNA | gene=Tb927.10.2750 | organism=Trypanosoma_brucei_brucei_TREU927 | gene_product=deoxyhypusine synthase | transcript_product=deoxyhypusine synthase | location=Tb927_10_v5.1:704204-705589(+) | protein_le	deoxyhypusine synthase	Tb927.10.2750	3	3	3	10	10	10	50.17	0	18.041	38986000	14	2	3	3	3	1	2	1	2	2	3	3	3	1	2	1	2	2	3	3	3	1	2	1	2	461	461	6.3	10	10
	0.729569	0.186394	-0.0820422	0.944719	Tb927.7.270:mRNA-p1	Tb927.7.270:mRNA-p1	Tb927.7.270:mRNA-p1 | transcript=Tb927.7.270:mRNA | gene=Tb927.7.270 | organism=Trypanosoma_brucei_brucei_TREU927 | gene_product=Ribosome production factor 2 homolog | transcript_product=Ribosome production factor 2 homolog | location=Tb927_07_v5.1:47961-4	Ribosome production factor 2 homolog	Tb927.7.270	17	17	17	54.6	54.6	54.6	41.798	0	41.729	409640000	76	14	14	15	14	13	16	14	13	14	14	15	14	13	16	14	13	14	14	15	14	13	16	14	13	370	370	45.1	45.1	47.6
	0.729255	0.186528	-0.0977874	0.934465	Tb927.11.13180:mRNA-p1	Tb927.11.13180:mRNA-p1	Tb927.11.13180:mRNA-p1 | transcript=Tb927.11.13180:mRNA | gene=Tb927.11.13180 | organism=Trypanosoma_brucei_brucei_TREU927 | gene_product=Present in the outer mitochondrial membrane proteome 10 | transcript_product=Present in the outer mitochondrial membra	Present in the outer mitochondrial membrane proteome 10	Tb927.11.13180	16	16	16	41.2	41.2	41.2	61.21	0	116.58	1110300000	113	14	14	13	14	14	14	15	13	14	14	13	14	14	14	15	13	14	14	13	14	14	14	15	13	560	560	36.6	39.3	36.4
	0.729252	0.18653	0.240467	1.18138	Tb927.7.5310:mRNA-p1	Tb927.7.5310:mRNA-p1	Tb927.7.5310:mRNA-p1 | transcript=Tb927.7.5310:mRNA | gene=Tb927.7.5310 | organism=Trypanosoma_brucei_brucei_TREU927 | gene_product=YEATS family, putative | transcript_product=YEATS family, putative | location=Tb927_07_v5.1:1409810-1411798(+) | protein_len	YEATS family	Tb927.7.5310	5	5	5	13.9	13.9	13.9	72.641	0	14.387	94608000	19	4	5	4	5	5	5	5	3	4	5	4	5	5	5	5	3	4	5	4	5	5	5	5	3	662	662	12.5	13.9	12.5
	0.729116	0.186588	-0.0419908	0.971314	Tb927.10.6640:mRNA-p1	Tb927.10.6640:mRNA-p1	Tb927.10.6640:mRNA-p1 | transcript=Tb927.10.6640:mRNA | gene=Tb927.10.6640 | organism=Trypanosoma_brucei_brucei_TREU927 | gene_product=transmembrane emp24 domain-containing protein | transcript_product=transmembrane emp24 domain-containing protein | locati	transmembrane emp24 domain-containing protein	Tb927.10.6640	10	10	10	51.4	51.4	51.4	28.188	0	143.24	950210000	112	10	10	8	10	9	9	9	9	10	10	8	10	9	9	9	9	10	10	8	10	9	9	9	9	253	253	51.4	51.4	37.2
	0.728865	0.186696	-0.0808034	0.945531	Tb927.7.3430:mRNA-p1	Tb927.7.3430:mRNA-p1	Tb927.7.3430:mRNA-p1 | transcript=Tb927.7.3430:mRNA | gene=Tb927.7.3430 | organism=Trypanosoma_brucei_brucei_TREU927 | gene_product=cyclophilin-type peptidyl-prolyl cis-trans isomerase, putative | transcript_product=cyclophilin-type peptidyl-prolyl cis-tra	cyclophilin-type peptidyl-prolyl cis-trans isomerase	Tb927.7.3430	4	4	4	25.1	25.1	25.1	25.548	0	13.06	82520000	26	4	4	4	4	4	4	4	4	4	4	4	4	4	4	4	4	4	4	4	4	4	4	4	4	231	231	25.1	25.1	25.1
	0.728515	0.186846	0.0406995	1.02861	Tb927.7.920:mRNA-p1;Tb11.v5.0698.1-p1	Tb927.7.920:mRNA-p1	Tb927.7.920:mRNA-p1 | transcript=Tb927.7.920:mRNA | gene=Tb927.7.920 | organism=Trypanosoma_brucei_brucei_TREU927 | gene_product=Inner arm dynein 5-1 | transcript_product=Inner arm dynein 5-1 | location=Tb927_07_v5.1:216317-228655(-) | protein_length=4112	Inner arm dynein 5-1	Tb927.7.920	76	74	74	24.7	24.3	24.3	468.08	0	266.49	2016000000	324	65	69	65	58	65	64	62	67	63	67	63	56	63	62	60	65	63	67	63	56	63	62	60	65	4112	NaN	21.7	22.7	21.5
	0.727712	0.187192	-0.18514	0.879564	Tb927.3.5430:mRNA-p1	Tb927.3.5430:mRNA-p1	Tb927.3.5430:mRNA-p1 | transcript=Tb927.3.5430:mRNA | gene=Tb927.3.5430 | organism=Trypanosoma_brucei_brucei_TREU927 | gene_product=hypothetical protein, conserved | transcript_product=hypothetical protein, conserved | location=Tb927_03_v5.1:1519765-152058	hypothetical protein	Tb927.3.5430	5	5	5	22.1	22.1	22.1	31.212	0	11.912	255900000	28	5	5	5	5	5	4	4	4	5	5	5	5	5	4	4	4	5	5	5	5	5	4	4	4	271	271	22.1	22.1	22.1
	0.727486	0.18729	-0.0766673	0.948246	Tb927.10.6010:mRNA-p1;Tb11.v5.0195.1-p1	Tb927.10.6010:mRNA-p1;Tb11.v5.0195.1-p1	Tb927.10.6010:mRNA-p1 | transcript=Tb927.10.6010:mRNA | gene=Tb927.10.6010 | organism=Trypanosoma_brucei_brucei_TREU927 | gene_product=Cohesin subunit SCC3, putative | transcript_product=Cohesin subunit SCC3, putative | location=Tb927_10_v5.1:1512569-15160	Cohesin subunit SCC3	Tb927.10.6010	18	18	18	21.1	21.1	21.1	128.01	0	42.95	524440000	63	14	13	17	15	15	14	14	15	14	13	17	15	15	14	14	15	14	13	17	15	15	14	14	15	1164	NaN	18.1	16.9	21
	0.727019	0.187491	-0.223292	0.856608	Tb927.9.3850:mRNA-p1	Tb927.9.3850:mRNA-p1	Tb927.9.3850:mRNA-p1 | transcript=Tb927.9.3850:mRNA | gene=Tb927.9.3850 | organism=Trypanosoma_brucei_brucei_TREU927 | gene_product=Protein of unknown function (DUF788), putative | transcript_product=Protein of unknown function (DUF788), putative | locatio	Protein of unknown function (DUF788)	Tb927.9.3850	1	1	1	10.8	10.8	10.8	19.651	0	9.4527	16527000	8	1	1	1	1	1	1	1	1	1	1	1	1	1	1	1	1	1	1	1	1	1	1	1	1	176	176	10.8	10.8	10.8
	0.725573	0.188117	-0.0841045	0.94337	Tb927.10.3900:mRNA-p1	Tb927.10.3900:mRNA-p1	Tb927.10.3900:mRNA-p1 | transcript=Tb927.10.3900:mRNA | gene=Tb927.10.3900 | organism=Trypanosoma_brucei_brucei_TREU927 | gene_product=CAMK/CAMKL family protein kinase, putative | transcript_product=CAMK/CAMKL family protein kinase, putative | location=Tb9	CAMK/CAMKL family protein kinase	Tb927.10.3900	17	17	17	32.3	32.3	32.3	83.218	0	33.67	432440000	76	16	15	15	15	15	16	16	16	16	15	15	15	15	16	16	16	16	15	15	15	15	16	16	16	740	740	31.1	28	29.7
	0.723704	0.188928	0.133646	1.09706	Tb927.7.4060:mRNA-p1	Tb927.7.4060:mRNA-p1	Tb927.7.4060:mRNA-p1 | transcript=Tb927.7.4060:mRNA | gene=Tb927.7.4060 | organism=Trypanosoma_brucei_brucei_TREU927 | gene_product=cysteine peptidase, Clan CA, family C2, putative | transcript_product=cysteine peptidase, Clan CA, family C2, putative | loc	cysteine peptidase	Tb927.7.4060	11	3	3	89.6	34.8	34.8	12.873	0	21.531	1046800000	51	11	11	11	11	11	11	11	10	3	3	3	3	3	3	3	3	3	3	3	3	3	3	3	3	115	115	89.6	89.6	89.6
	0.723597	0.188974	-0.150629	0.900858	Tb927.8.3880.1:mRNA-p1;Tb927.8.3880.2:mRNA-p1;Tb927.8.3890:mRNA-p1;Tb927.8.3900:mRNA-p1	Tb927.8.3880.1:mRNA-p1;Tb927.8.3880.2:mRNA-p1;Tb927.8.3890:mRNA-p1;Tb927.8.3900:mRNA-p1	Tb927.8.3880.1:mRNA-p1 | transcript=Tb927.8.3880.1:mRNA | gene=Tb927.8.3880 | organism=Trypanosoma_brucei_brucei_TREU927 | gene_product=hypothetical protein, conserved | transcript_product=hypothetical protein, conserved | location=Tb927_08_v5.1:1157696-11	hypothetical protein	Tb927.8.3880	2	2	2	10.8	10.8	10.8	26.713	0	5.3193	62217000	16	2	2	2	2	2	2	2	2	2	2	2	2	2	2	2	2	2	2	2	2	2	2	2	2	241	NaN	10.8	10.8	10.8
	0.722768	0.189335	-0.237356	0.848298	Tb927.11.16020:mRNA-p1	Tb927.11.16020:mRNA-p1	Tb927.11.16020:mRNA-p1 | transcript=Tb927.11.16020:mRNA | gene=Tb927.11.16020 | organism=Trypanosoma_brucei_brucei_TREU927 | gene_product=RNA-binding protein, putative | transcript_product=RNA-binding protein, putative | location=Tb927_11_v5.1:4243478-4244	RNA-binding protein	Tb927.11.16020	4	4	4	13.6	13.6	13.6	50.194	0	8.5319	94561000	17	3	3	3	4	3	4	4	2	3	3	3	4	3	4	4	2	3	3	3	4	3	4	4	2	433	433	9.5	10.6	10.6
	0.722732	0.189351	-0.109893	0.926657	Tb927.10.14130:mRNA-p1	Tb927.10.14130:mRNA-p1	Tb927.10.14130:mRNA-p1 | transcript=Tb927.10.14130:mRNA | gene=Tb927.10.14130 | organism=Trypanosoma_brucei_brucei_TREU927 | gene_product=SRP19 protein, putative | transcript_product=SRP19 protein, putative | location=Tb927_10_v5.1:3432891-3433349(-) | pro	SRP19 protein	Tb927.10.14130	5	5	5	45.4	45.4	45.4	17.116	0	20.743	145950000	26	4	5	5	5	4	5	4	5	4	5	5	5	4	5	4	5	4	5	5	5	4	5	4	5	152	152	38.8	45.4	45.4
	0.722712	0.18936	-0.782105	0.581518	Tb927.11.7040:mRNA-p1	Tb927.11.7040:mRNA-p1	Tb927.11.7040:mRNA-p1 | transcript=Tb927.11.7040:mRNA | gene=Tb927.11.7040 | organism=Trypanosoma_brucei_brucei_TREU927 | gene_product=pterin-4-alpha-carbinolamine dehydratase, putative | transcript_product=pterin-4-alpha-carbinolamine dehydratase, putativ	pterin-4-alpha-carbinolamine dehydratase	Tb927.11.7040	2	2	2	28.3	28.3	28.3	13.059	0.0030828	1.6991	25362000	4	1	1	0	2	2	2	1	1	1	1	0	2	2	2	1	1	1	1	0	2	2	2	1	1	113	113	18.6	18.6	0
	0.721421	0.189924	-0.0954099	0.936006	Tb927.9.1380:mRNA-p1	Tb927.9.1380:mRNA-p1	Tb927.9.1380:mRNA-p1 | transcript=Tb927.9.1380:mRNA | gene=Tb927.9.1380 | organism=Trypanosoma_brucei_brucei_TREU927 | gene_product=hypothetical protein, conserved | transcript_product=hypothetical protein, conserved | location=Tb927_09_v5.1:343679-344818(	hypothetical protein	Tb927.9.1380	13	13	13	44.1	44.1	44.1	42.439	0	45.448	571230000	79	11	11	12	10	11	13	10	12	11	11	12	10	11	13	10	12	11	11	12	10	11	13	10	12	379	379	39.6	39.6	42.2
	0.721281	0.189985	-0.201954	0.869372	Tb927.10.3340:mRNA-p1;Tb11.v5.1022.1-p1	Tb927.10.3340:mRNA-p1;Tb11.v5.1022.1-p1	Tb927.10.3340:mRNA-p1 | transcript=Tb927.10.3340:mRNA | gene=Tb927.10.3340 | organism=Trypanosoma_brucei_brucei_TREU927 | gene_product=CMGC/MAPK protein kinase, putative | transcript_product=CMGC/MAPK protein kinase, putative | location=Tb927_10_v5.1:85942	CMGC/MAPK protein kinase	Tb927.10.3340	3	3	3	7	7	7	98.706	0	3.6198	66460000	2	3	3	2	3	3	3	3	3	3	3	2	3	3	3	3	3	3	3	2	3	3	3	3	3	891	NaN	7	7	4.6
	0.720771	0.190208	-0.133446	0.911651	Tb927.8.6930:mRNA-p1	Tb927.8.6930:mRNA-p1	Tb927.8.6930:mRNA-p1 | transcript=Tb927.8.6930:mRNA | gene=Tb927.8.6930 | organism=Trypanosoma_brucei_brucei_TREU927 | gene_product=serine/threonine-protein kinase NRKB, putative | transcript_product=serine/threonine-protein kinase NRKB, putative | locatio	serine/threonine-protein kinase NRKB	Tb927.8.6930	8	8	2	23.9	23.9	7.9	47.915	0	31.216	458480000	56	8	8	8	8	8	8	8	7	8	8	8	8	8	8	8	7	2	2	2	2	2	2	2	1	431	431	23.9	23.9	23.9
	0.720485	0.190333	0.0947618	1.06789	Tb927.4.3420:mRNA-p1	Tb927.4.3420:mRNA-p1	Tb927.4.3420:mRNA-p1 | transcript=Tb927.4.3420:mRNA | gene=Tb927.4.3420 | organism=Trypanosoma_brucei_brucei_TREU927 | gene_product=wee1-like protein kinase | transcript_product=wee1-like protein kinase | location=Tb927_04_v5.1:892337-894148(-) | protein_l	wee1-like protein kinase	Tb927.4.3420	1	1	1	2.5	2.5	2.5	66.217	0.00049456	2.3246	7259700	2	1	1	1	1	1	1	1	1	1	1	1	1	1	1	1	1	1	1	1	1	1	1	1	1	603	603	2.5	2.5	2.5
	0.719953	0.190567	0.08146	1.05809	Tb927.9.13920:mRNA-p1;Tb927.9.13860:mRNA-p1;Tb927.9.13820:mRNA-p1;Tb927.9.13795:mRNA-p1;Tb927.9.13785:mRNA-p1	Tb927.9.13920:mRNA-p1;Tb927.9.13860:mRNA-p1;Tb927.9.13820:mRNA-p1;Tb927.9.13795:mRNA-p1;Tb927.9.13785:mRNA-p1	Tb927.9.13920:mRNA-p1 | transcript=Tb927.9.13920:mRNA | gene=Tb927.9.13920 | organism=Trypanosoma_brucei_brucei_TREU927 | gene_product=kinetoplastid membrane protein 11-1 | transcript_product=kinetoplastid membrane protein 11-1 | location=Tb927_09_v5.1:218	kinetoplastid membrane protein 11-1	Tb927.9.13920	14	14	14	87	87	87	11.076	0	48.152	51445000000	218	12	12	14	13	12	12	13	14	12	12	14	13	12	12	13	14	12	12	14	13	12	12	13	14	92	NaN	83.7	83.7	87
	0.719012	0.19098	0.174056	1.12823	Tb927.1.2260:mRNA-p1	Tb927.1.2260:mRNA-p1	Tb927.1.2260:mRNA-p1 | transcript=Tb927.1.2260:mRNA | gene=Tb927.1.2260 | organism=Trypanosoma_brucei_brucei_TREU927 | gene_product=small myristoylated protein 1-2 | transcript_product=small myristoylated protein 1-2 | location=Tb927_01_v5.1:564977-565366(	small myristoylated protein 1-2	Tb927.1.2260	7	4	4	53.5	33.3	33.3	14.03	0	14.84	557220000	27	7	7	7	7	7	7	7	7	4	4	4	4	4	4	4	4	4	4	4	4	4	4	4	4	129	129	53.5	53.5	53.5
	0.718814	0.191067	-0.129528	0.91413	Tb927.11.7380:mRNA-p1	Tb927.11.7380:mRNA-p1	Tb927.11.7380:mRNA-p1 | transcript=Tb927.11.7380:mRNA | gene=Tb927.11.7380 | organism=Trypanosoma_brucei_brucei_TREU927 | gene_product=glycerol-3-phosphate dehydrogenase (FAD-dependent), mitochondrial | transcript_product=glycerol-3-phosphate dehydrogenase	glycerol-3-phosphate dehydrogenase (FAD-dependent)	Tb927.11.7380	32	32	32	65.3	65.3	65.3	66.991	0	273.32	11253000000	455	32	32	31	32	32	32	32	31	32	32	31	32	32	32	32	31	32	32	31	32	32	32	32	31	603	603	65.3	65.3	63.3
	0.718426	0.191238	-0.132479	0.912262	Tb927.10.12260:mRNA-p1	Tb927.10.12260:mRNA-p1	Tb927.10.12260:mRNA-p1 | transcript=Tb927.10.12260:mRNA | gene=Tb927.10.12260 | organism=Trypanosoma_brucei_brucei_TREU927 | gene_product=cytosolic nonspecific dipeptidase, putative | transcript_product=cytosolic nonspecific dipeptidase, putative | locatio	cytosolic nonspecific dipeptidase	Tb927.10.12260	13	12	12	40.6	38.9	38.9	51.578	0	83.375	721300000	60	12	12	11	11	11	13	11	11	11	11	10	10	10	12	10	10	11	11	10	10	10	12	10	10	475	475	39.2	39.2	39.2
	0.717773	0.191526	0.251231	1.19022	Tb927.11.17670:mRNA-p1	Tb927.11.17670:mRNA-p1	Tb927.11.17670:mRNA-p1 | transcript=Tb927.11.17670:mRNA | gene=Tb927.11.17670 | organism=Trypanosoma_brucei_brucei_TREU927 | gene_product=variant surface glycoprotein (VSG), degenerate | transcript_product=variant surface glycoprotein (VSG), degenerate | l	variant surface glycoprotein (VSG)	Tb927.11.17670	1	1	1	1.8	1.8	1.8	47.04	0.0035039	1.4625	423630000	3	1	1	1	1	1	1	1	1	1	1	1	1	1	1	1	1	1	1	1	1	1	1	1	1	438	438	1.8	1.8	1.8
	0.717037	0.19185	0.189044	1.14001	Tb927.3.1170:mRNA-p1	Tb927.3.1170:mRNA-p1	Tb927.3.1170:mRNA-p1 | transcript=Tb927.3.1170:mRNA | gene=Tb927.3.1170 | organism=Trypanosoma_brucei_brucei_TREU927 | gene_product=TAP42-like family, putative | transcript_product=TAP42-like family, putative | location=Tb927_03_v5.1:282405-283598(+) | pro	TAP42-like family	Tb927.3.1170	5	5	5	16.6	16.6	16.6	45.363	0	9.0064	70435000	12	4	4	3	2	3	3	4	3	4	4	3	2	3	3	4	3	4	4	3	2	3	3	4	3	397	397	14.4	14.4	11.3
	0.716714	0.191993	-0.439716	0.73728	Tb11.v5.0536.1-p1;Tb927.1.1050:mRNA-p1	Tb11.v5.0536.1-p1;Tb927.1.1050:mRNA-p1	Tb11.v5.0536.1-p1 | transcript=Tb11.v5.0536.1 | gene=Tb11.v5.0536 | organism=Trypanosoma_brucei_brucei_TREU927 | gene_product=hypothetical protein, conserved | transcript_product=hypothetical protein, conserved | location=Tb927_11_bin_v5.1:2322458-2324113(	hypothetical protein	Tb11.v5.0536	2	2	2	3.4	3.4	3.4	61.861	0.00072657	2.0049	14888000	8	2	2	2	2	2	2	2	2	2	2	2	2	2	2	2	2	2	2	2	2	2	2	2	2	551	NaN	3.4	3.4	3.4
	0.716106	0.192262	0.0924401	1.06617	Tb927.8.6160:mRNA-p1;Tb927.8.6150:mRNA-p1	Tb927.8.6160:mRNA-p1;Tb927.8.6150:mRNA-p1	Tb927.8.6160:mRNA-p1 | transcript=Tb927.8.6160:mRNA | gene=Tb927.8.6160 | organism=Trypanosoma_brucei_brucei_TREU927 | gene_product=40S ribosomal protein S8, putative | transcript_product=40S ribosomal protein S8, putative | location=Tb927_08_v5.1:1796603-	40S ribosomal protein S8	Tb927.8.6160	6	6	6	34.5	34.5	34.5	24.937	0	68.094	4746400000	127	6	6	6	6	6	6	6	6	6	6	6	6	6	6	6	6	6	6	6	6	6	6	6	6	220	NaN	34.5	34.5	34.5
	0.715646	0.192466	-0.183847	0.880352	Tb927.10.5540:mRNA-p1	Tb927.10.5540:mRNA-p1	Tb927.10.5540:mRNA-p1 | transcript=Tb927.10.5540:mRNA | gene=Tb927.10.5540 | organism=Trypanosoma_brucei_brucei_TREU927 | gene_product=hypothetical protein, conserved | transcript_product=hypothetical protein, conserved | location=Tb927_10_v5.1:1390380-139	hypothetical protein	Tb927.10.5540	3	3	3	12.5	12.5	12.5	30.445	0	4.3589	56097000	19	3	3	3	3	2	2	3	3	3	3	3	3	2	2	3	3	3	3	3	3	2	2	3	3	271	271	12.5	12.5	12.5
	0.71523	0.192651	-0.104539	0.930102	Tb927.8.1090:mRNA-p1	Tb927.8.1090:mRNA-p1	Tb927.8.1090:mRNA-p1 | transcript=Tb927.8.1090:mRNA | gene=Tb927.8.1090 | organism=Trypanosoma_brucei_brucei_TREU927 | gene_product=NPAPL | transcript_product=NPAPL | location=Tb927_08_v5.1:347671-349911(-) | protein_length=746 | sequence_SO=chromosome | S	NPAPL	Tb927.8.1090	8	8	8	17	17	17	81.678	0	25.009	201830000	35	7	6	7	6	7	7	7	6	7	6	7	6	7	7	7	6	7	6	7	6	7	7	7	6	746	746	15.7	14.5	15.7
	0.713677	0.193341	0.176734	1.13032	Tb927.7.4750:mRNA-p1;Tb11.v5.0158.1-p1	Tb927.7.4750:mRNA-p1;Tb11.v5.0158.1-p1	Tb927.7.4750:mRNA-p1 | transcript=Tb927.7.4750:mRNA | gene=Tb927.7.4750 | organism=Trypanosoma_brucei_brucei_TREU927 | gene_product=hypothetical protein, conserved | transcript_product=hypothetical protein, conserved | location=Tb927_07_v5.1:1260954-126219	hypothetical protein	Tb927.7.4750	7	7	7	31	31	31	45.395	0	86.516	223550000	27	7	7	7	6	6	6	6	7	7	7	7	6	6	6	6	7	7	7	7	6	6	6	6	7	413	NaN	31	31	31
[truncated: 3,498 more rows]
[truncated: 30 more columns]
